# Supplementary material for: Regulatory network characterization of anthocyanin metabolites in purple sweetpotato via joint transcriptomics and metabolomics
Source: Front Plant Sci. 2023 Feb 9;14:1030236. doi: 10.3389/fpls.2023.1030236 (PMC9951203; doi:10.3389/fpls.2023.1030236)
Supplement: Supplementary file 1 [file Table_1.xlsx]

## Sheet: Table1
Metabolte name	Log2(Fold Change)
	DZ88 vs 1143-1	DZ54 vs 1143-1	DZ88 vs HS	DZ54 vs HS	DZ54 vs DZ88	HS vs 1143-1
Anthocyanin (13)
Cyanidin 3-(6′′-caffeoylsophoroside)-5-glucoside	13.0514	13.5228	13.0514	13.5228	#	#
Cyanidin 3-caffeoyl-p-hydroxybenzoylsophoroside-5-glucoside	17.25	18.5799	17.25	18.5799	1.32993	#
Cyanidin 3-feruloyl-p-hydroxybenzoylsophorside-5-glucoside	17.7491	20.9227	17.7491	20.9227	3.17359	#
Cyanidin 3-feruloylsophorside-5-glucoside	13.69	12.8552	13.69	12.8552	#	#
Cyanidin 3-p-hydroxybenzoylsophoroside-5-glucoside	15.4894	15.9064	15.4894	15.9064	#	#
Cyanidin-3-(sinapoyl)diglucoside-5-xyloside	13.5838	12.8208	13.5838	12.8208	#	#
Peonidin	-4.97047	-2.17007	#	#	2.8004	-1.56747
peonidin 3-caffeoyl-p-hydroxybenzoyl-sophoroside-5-glucoside	17.1304	20.385	17.1304	20.385	3.25463	#
Peonidin 3-feruloylsophoroside-5-glucoside	12.7387	14.5331	12.7387	14.5331	1.79442	#
Peonidin-3-(6′-p-hydroxybenzoyl)-sophoroside-5-glucoside	12.8185	14.6312	12.8185	14.6312	1.81267	#
Pelargonidin 3-caffeoyl-p-hydroxybenzoylsophorside-5-glucoside	12.7769	15.2338	12.7769	15.2338	2.457	#
Petunidin 3-O-glucoside	11.9761	13.6353	11.9761	13.6353	1.65921	#
Malvidin	#	1.85948	1.10959	2.48717	1.37758	#
Quercetin derivatives (16)
Quercetin 3-alpha-L-arabinofuranoside (Avicularin)	-9.31827	-9.31827	-12.1921	-12.1921	#	2.87386
Quercetin 3-O-glucoside(Isotrifoliin)	-2.01106	-2.99326	-3.20416	-4.18636	#	1.1931
Quercetin 3-O-β-D-xylopyranoside	#	#	-11.7072	-11.7072	#	11.7072
Quercetin O-acetylhexoside	-2.12335	-11.5114	-4.26622	-13.6543	-9.38803	4.74723
Quercetin-3-O-α-L-rhamnopyranoside	-19.3837	-19.3837	-17.3261	-17.3261	#	-2.05759
Quercetinn 3-O-(6′′-O-malonyl)-galactoside	-12.4512	-12.4512	-14.0529	-14.0529	#	1.60167
Quercetin-O-glucoside	-2.5138	-3.36214	-3.611	-4.45934	#	#
methylQuercetin O-hexoside	#	1.96029	#	-2.78694	#	4.74723
Isoquercitrin	-2.36417	-3.46775	-3.43203	-4.5356	-1.10357	#
Isorhamnetin-O-gallate	-1.10309	#	#	#	1.09659	#
Isorhamnetin O-acetyl-hexoside	#	#	#	-3.28991	-2.68251	#
Isorhamnetin-3-O-β-D-glucoside	2.39802	2.43516	-2.53938	-2.50224	#	4.9374
Isorhamnetin 3-O-β-(2''-O-acetyl-β-D-glucuronide)	-13.5574	-13.5574	-11.896	-11.896	#	-1.66141
Hyperin	-2.38802	-3.45679	-3.30446	-4.37323	-1.06877	1.267
Spiraeoside	-2.19755	-3.10722	-3.46455	-4.37422	#	1.23594
Gossypitrin	-2.17286	-2.99045	-3.4088	-4.22638	#	#
Kaempferol derivatives (5)
6-Hydroxykaempferol-7-O-glucoside	-2.25309	-2.78109	-3.55124	-4.07923	#	1.29815
Astragalin	-5.93646	-7.59213	-3.25957	#	#	-2.67689
Kaempferol 3-O-(6′′-O-malonyl)-galactoside	-12.8835	-12.8835	-11.7813	-11.7813	#	#
Kaempferol 7-O-glucosdie	-18.7405	-18.7405	-16.2487	-16.2487	#	-2.49181
Trifolin	-6.27334	-18.9922	-3.47972	-16.1986	-12.7189	-2.79362
Luteolin derivatives (4)
Luteolin-4'-O-β-D-glucoside	-19.6546	-19.6546	-17.6253	-17.6253	#	-2.02927
Luteolin-7-O-glucoside	-5.36347	-20.9237	-2.96907	-18.5293	-15.5602	-2.39441
Luteolin 3'-O-β-D-glucoside	-19.5045	-19.5045	-17.6658	-17.6658	#	-1.83865
6-Hydroxyluteolin 5-glucoside	-2.12729	-2.9416	-3.35663	-4.17094	#	1.22934
Quinic acid derivatives (9)
1-O-Caffeoylquinic acid(1-Caffeoylquinic acid)	1.34744	2.225	1.11563	1.99319	#	#
4-O-Caffeoylquinic acid(Cryptochlorogenic acid)	#	2.04178	#	1.15714	1.04809	#
5-O-Caffeoylquinic acid(Neochlorogenic acid)	1.16355	1.91987	#	1.75123	#	#
3,5-di-O-Caffeoylquinic acid(Isochlorogenic acid A)	1.08456	1.99883	#	#	#	1.0225
3,4-di-O-caffeoylquinic acid(Isochlorogenic acid B)	#	1.98845	#	1.08923	1.21009	#
4,5-di-O-caffeoylquinic acid(Isochlorogenic acid C)	1.01975	#	#	#	#	#
Trihydroxycinnamoylquinic acid	#	#	1.26929	#	#	-1.10296
Maleoyl-caffeoylquinic acid	1.40641	1.88614	14.4815	14.9612	#	-13.0751
3-O-p-Coumaroyl quinic acid	2.30923	2.48056	2.0033	2.17462	#	#
