# Supplementary material for: Regulatory network characterization of anthocyanin metabolites in purple sweetpotato via joint transcriptomics and metabolomics
Source: Front Plant Sci. 2023 Feb 9;14:1030236. doi: 10.3389/fpls.2023.1030236 (PMC9951203; doi:10.3389/fpls.2023.1030236)
Supplement: Supplementary Table 1 — Primers used in quantitative reverse transcription polymerase chain reaction (qRT-PCR) in this study. [file Table_2.xlsx]

## Sheet: Table S1
Table S1. Primers used in quantitative reverse transcription polymerase chain reaction (qRT-PCR) in this study
Gene name	Gene ID	Direction	Primer sequence (5'-3')
PAL	g57989	Forward	TCGCTGAGCTATTACATGAAGGCT
		Reverse	TATGACTTCAATCTGAGGGCCGAG
C4H	g48358	Forward	CCGCTCACTGGAAGAAACC
		Reverse	TGGGCAGGGCAAGGATAA
4CL	g60727	Forward	CTATTGTCGTTGGGCTCCACT
		Reverse	GAAATACTGAGCGGAGCTGCAC
CHS	g8138	Forward	CCTCGGTCGTCTCGAACAA
		Reverse	TCCTCCACTTGGTCCAGAATC
CHI	g3524	Forward	TGCAGAGAGCAAAGCTATCGAG
		Reverse	CGGCATTGAACCGTCTTTGGA
F3H	g29398	Forward	TCCGCAACGACATTGTGAAGG
		Reverse	GGACATGTCAAACCGGAGCTT
F3'H	g55964	Forward	AGTTCACGACGCGAACTTCT
		Reverse	TGGCGAACATGCGAGAAGTCA
FLS	g13825	Forward	CCTCCTTCTGCGGTGAACTACA
		Reverse	TCCAGCCGCTTCCTTCAACTC
DFR	g17020	Forward	GCATCCCAAAGCAGAAGGAAGA
		Reverse	AACCACAGGCAAGTCCTTTTCA
ANS	g15751	Forward	GGATCAACTCGGAGGACTTGGA
		Reverse	CGTCGCCTGGTCATTAGCATAC
UFGT	g25051	Forward	CTCCGATTAGCCCATCCAATT
		Reverse	CGCTACATCGCACTCTGAACT
AT	g30878	Forward	GTTAGTCGTGGCGGAGTCTGA
		Reverse	TGGTGATTGGTCACGCCGAT
GST	g29615	Forward	CCGTGGTGGATCAATGGCTAGA
		Reverse	CGTCCAACACTTTTCCCAGCT
HCT	g31004	Forward	CCATCATGGTCCTGCAGATGATC
		Reverse	CATGAACGCGAGCTTCAACCCA
IbMYB1	g17138	Forward	TGACGACACAACCGGAAAC
		Reverse	ACATCTTCCCACCACTTCACG
IbbHLH2	g9535	Forward	CCACCTCCGCCTTCTCAAGTT
		Reverse	ATAGTAGCATCGCCGCCGT

## Sheet: Table S2
Table S2. Information of the total 418 metabolites detected in the four experimental sweet potato materials through the metabolomic analysis
Index	Q1 (Da)	Molecular Weight (Da)	Formula	Ionization model	Compounds	Class I	Class II	CAS	Level	mix01	mix02	mix03	1143-1 (mean value of the three biological replicates)	HS (mean value of the three biological replicates)	DZ88 (mean value of the three biological replicates)	DZ54 (mean value of the three biological replicates)
pme3011	104.06	103.063	C4H9NO2	[M+H]+	γ-Aminobutyric acid	Organic acids	Organic acids	56-12-2	B	107860	87100	106800	131955	73144.3	189333	59553
pme3017	104	103.063	C4H9NO2	[M+H]+	2-Aminoisobutyric acid	Amino acids and derivatives	Amino acids and derivatives	62-57-7	A	1839800	1847900	2169900	1739400	2134000	2092500	2.20007e+06
pme3033	104	103.063	C4H9NO2	[M+H]+	N,N-Dimethylglycine	Amino acids and derivatives	Amino acids and derivatives	1118-68-9	A	188310	164960	200270	192183	191973	218047	194043
wxhqs0331	1039	1039.27	C49H51O25	[M]+	Pelargonidin 3-caffeoyl-p-hydroxybenzoylsophorside-5-glucoside	Flavonoids	Anthocyanins	-	A	133490	145080	121750	9	9	63162.3	346807
mws0576	103.05	104.047	C4H8O3	[M-H]-	3-Hydroxybutyrate	Organic acids	Organic acids	300-85-6	B	971100	1256300	1326200	1723700	793127	1466200	1.13837e+06
mws0890	104.03	105.043	C3H7NO3	[M-H]-	D-Serine	Amino acids and derivatives	Amino acids and derivatives	312-84-5	A	44627	41744	27193	59438.3	18364	55600	28836.7
wxhqs0341	1055	1055.27	C49H51O26	[M]+	Cyanidin 3-caffeoyl-p-hydroxybenzoylsophoroside-5-glucoside	Flavonoids	Anthocyanins	-	A	1083600	1218900	1290100	9	9	1.40283e+06	3526600
Hmbp0904	107.05	106.041	C7H6O	[M+H]+	Benzaldehyde	Others	Others	100-52-7	A	580920	569010	602140	877880	581560	429937	192763
Rfmf00643	1069	1069.28	C50H53O26	[M]+	peonidin 3-caffeoyl-p-hydroxybenzoyl-sophoroside-5-glucoside	Flavonoids	Anthocyanins	-	A	4155100	4236400	4590100	9	9	1291250	1.2324e+07
LShqs0241	1069	1069.28	C50H53O26	[M]+	Cyanidin 3-feruloyl-p-hydroxybenzoylsophorside-5-glucoside	Flavonoids	Anthocyanins	-	B	5974100	6179800	6340900	9	9	1.98266e+06	1.78893e+07
mws0255	112	111.043	C4H5N3O	[M+H]+	Cytosine	Nucleotides and derivatives	Nucleotides and derivatives	71-30-7	B	116620	116710	115700	99051	112957	117071	100557
pme2122	112.08	111.08	C5H9N3	[M+H]+	Histamine	Amino acids and derivatives	Amino acids and derivatives	51-45-6	A	138850	117760	156900	119750	155757	141710	108835
pme0006	116.1	115.063	C5H9NO2	[M+H]+	L-Proline	Amino acids and derivatives	Amino acids and derivatives	147-85-3	A	5810800	4640200	5768800	6105600	2.97483e+06	4.01067e+06	4.56343e+06
mws2628	118.09	117.079	C5H11NO2	[M+H]+	N-Methyl-4-aminobutyric acid	Organic acids	Organic acids	1119-48-8	B	11282	9074.5	9627.6	2663.93	17630.7	14054.8	9
pme2634	118	117.079	C5H11NO2	[M+H]+	DL-Norvaline	Amino acids and derivatives	Amino acids and derivatives	6600-40-4	A	25318000	19624000	21383000	2.62727e+07	1.0433e+07	1.83207e+07	9.77293e+06
mws0191	118.1	117.079	C5H11NO2	[M+H]+	Betaine	Alkaloids	Alkaloids	107-43-7	A	22595000	19558000	22671000	10604000	1.68017e+07	2.15123e+07	19624000
mws0256	118.1	117.079	C5H11NO2	[M+H]+	L-Valine	Amino acids and derivatives	Amino acids and derivatives	72-18-4	A	28931000	24763000	27534000	3.30937e+07	14099000	23600000	13111000
mws0470	117.02	118.027	C4H6O4	[M-H]-	Methylmalonic acid	Organic acids	Organic acids	516-05-2	A	14292000	18052000	17668000	2.41023e+07	1.49363e+07	1.36937e+07	1.56507e+07
mws0192	117.03	118.027	C4H6O4	[M-H]-	Succinic acid	Organic acids	Organic acids	110-15-6	A	14572000	18265000	18355000	2.48683e+07	1.53533e+07	1.40383e+07	1.60457e+07
mws0671	120.1	119.058	C4H9NO3	[M+H]+	L-Homoserine	Organic acids	Organic acids	672-15-1	B	2293800	1663400	1874500	1883100	1692400	1583500	1094690
mws0230	120	119.058	C4H9NO3	[M+H]+	L-(-)-Threonine	Amino acids and derivatives	Amino acids and derivatives	72-19-5	A	1496300	1032000	1238000	1.65563e+06	1.45517e+06	1.04668e+06	546113
pmp1287	120.08	119.074	C8H9N	[M+H]+	N-Benzylmethylene isomethylamine	Alkaloids	Alkaloids	-	A	21089000	17972000	19232000	2.19347e+07	1.76493e+07	1.24633e+07	6.96737e+06
mws0628	121.04	122.037	C7H6O2	[M-H]-	4-Hydroxybenzaldehyde	Phenolic acids	Phenolic acids	123-08-0	A	150800	171930	158670	265720	160343	136610	98577
mws0133	123.1	122.048	C6H6N2O	[M+H]+	Nicotinamide	Others	Vitamin	98-92-0	B	357840	296300	374860	183470	288417	230057	251257
pme0490	124	123.032	C6H5NO2	[M+H]+	Nicotinic acid	Others	Vitamin	59-67-6	B	118220	70056	86777	32817	102370	68856.7	77153.3
mws0572	126.1	125.059	C5H7N3O	[M+H]+	5-Methylcytosine	Nucleotides and derivatives	Nucleotides and derivatives	554-01-8	B	36815	31706	39311	25016.3	24189	23991	29425
pmp1086	127	126.032	C6H6O3	[M+H]+	5-Hydroxymethylfurfural	Phenolic acids	Phenolic acids	67-47-0	A	1104500	767330	661710	887170	945447	601847	341297
Rfmb319	130.09	129.079	C6H11NO2	[M+H]+	Pipecolic acid	Amino acids and derivatives	Amino acids and derivatives	4043-87-2	B	2174600	1712600	1876700	808220	1596800	858953	1.78217e+06
mws0712	130.1	131.058	C5H9NO3	[M-H]-	N-Propionylglycine	Amino acids and derivatives	Amino acids and derivatives	21709-90-0	B	39151	46560	41417	32074.7	65633.3	52972.7	56204
mws0216	132.06	131.058	C5H9NO3	[M+H]+	Trans-4-Hydroxy-L-proline	Amino acids and derivatives	Amino acids and derivatives	51-35-4	B	10478000	8674300	9968000	12423400	3784900	8329900	3.01767e+06
mws1587	132.1	131.095	C6H13NO2	[M+H]+	α-Aminocaproic acid	Amino acids and derivatives	Amino acids and derivatives	327-57-1	A	65487000	60829000	58973000	61622000	3.39447e+07	4.74577e+07	2.88513e+07
mws0227	132.1	131.095	C6H13NO2	[M+H]+	L-Leucine	Amino acids and derivatives	Amino acids and derivatives	61-90-5	A	60952000	57110000	56875000	5.93907e+07	3.08607e+07	44124000	2.60607e+07
mws0258	132	131.095	C6H13NO2	[M+H]+	L-Isoleucine	Amino acids and derivatives	Amino acids and derivatives	73-32-5	A	63907000	58132000	58711000	6.05407e+07	3.13533e+07	4.51593e+07	27116000
pme0274	132.09	131.095	C6H13NO2	[M+H]+	6-Aminocaproic acid	Organic acids	Organic acids	60-32-2	B	11308000	8627700	8747200	1.04999e+07	3.55553e+06	7.09247e+06	3013500
pmp1198	132.1	131.095	C6H13NO2	[M+H]+	6-Deoxyfagomine	Alkaloids	Alkaloids	197449-09-5	A	2524100	2014000	2248700	2480300	770593	1674100	691463
mws0473	131.04	132.042	C5H8O4	[M-H]-	2-Methylsuccinic acid	Organic acids	Organic acids	498-21-5	A	1573200	1984400	1904400	2.33977e+06	2.61657e+06	1.22643e+06	1.48237e+06
mws0001	133.05	132.054	C4H8N2O3	[M+H]+	L-Asparagine Anhydrous	Amino acids and derivatives	Amino acids and derivatives	70-47-3	A	21770000	15338000	16789000	11289100	2081800	1.94943e+07	1.29073e+07
mws0219	132	133.038	C4H7NO4	[M-H]-	L-AsparticAcid	Amino acids and derivatives	Amino acids and derivatives	56-84-8	A	10858000	13176000	12443000	17552000	7858900	18377000	1.26653e+07
mws0275	133	134.022	C4H6O5	[M-H]-	L-(-)-Malic acid	Organic acids	Organic acids	636-61-3	A	67572000	75414000	73887000	7.51423e+07	6.40007e+07	78517000	6.66873e+07
pme0040	136.1	135.054	C5H5N5	[M+H]+	Adenine	Nucleotides and derivatives	Nucleotides and derivatives	73-24-5	A	5658400	4413500	4645600	2.97207e+06	3.50587e+06	4.68133e+06	1.85423e+06
pmb0374	136.1	135.054	C5H5N5	[M+H]+	Aminopurine	Alkaloids	Alkaloids	452-06-2	A	227400	150950	141800	94578	119030	143007	90238.7
pme1173	137	136.039	C5H4N4O	[M+H]+	Allopurinol	Nucleotides and derivatives	Nucleotides and derivatives	315-30-0	B	21924	16260	18485	12808	13733	16242.3	9519.73
pme2268	138	137.048	C7H7NO2	[M+H]+	Trigonelline	Alkaloids	Alkaloids	535-83-1	A	2442800	1811600	1913400	9	2.03993e+06	2999157	9
mws0146	138.05	137.048	C7H7NO2	[M+H]+	Nicotinic Acid Methyl Ester(Methyl Nicotinate)	Alkaloids	Alkaloids	93-60-7	A	326510	283410	275270	18312.7	33013.3	212660	165337
pme1002	138.08	137.084	C8H11NO	[M+H]+	L-Tyramine	Amino acids and derivatives	Amino acids and derivatives	51-67-2	A	1358700	1045600	1103000	300768	1860100	708543	410760
Hmln1566	137.02	138.032	C7H6O3	[M-H]-	salicylic acid	Phenolic acids	Phenolic acids	-	A	1360200	1604100	1542500	717780	558190	807490	3.35023e+06
mws0749	137.03	138.032	C7H6O3	[M-H]-	4-Hydroxybenzoic acid	Phenolic acids	Phenolic acids	99-96-7	A	1959800	2306800	2168600	942073	715557	1194010	4.78127e+06
Hmgn1653	137.02	138.032	C7H6O3	[M-H]-	Protocatechuic aldehyde	Flavonoids	Flavanols	139-85-5	B	1192900	1701100	1825100	807213	627923	954113	3.41953e+06
mws2368	137.07	138.068	C8H10O2	[M-H]-	Tyrosol	Phenolic acids	Phenolic acids	501-94-0	B	125190	157930	157070	59077	97719.3	143810	220523
pme3207	141.03	142.027	C6H6O4	[M-H]-	Trans,trans-Muconic acid	Organic acids	Organic acids	3588-17-8	B	9026800	9220300	9018100	3.84513e+06	7.39133e+06	1.68533e+07	10865500
Rfmb3181	144.1	144.103	C7H14NO2+	[M]+	Proline betaine(ProBet)	Amino acids and derivatives	Amino acids and derivatives	1195-94-4	A	2133600	1498600	1765600	1.27027e+06	1.59183e+06	862370	606897
pme0295	146.07	145.074	C6H11NO3	[M+H]+	4-Acetamidobutyric acid	Organic acids	Organic acids	3025-96-5	B	169280	124460	152610	9	237690	77989.7	9
mws0567	146.09	145.085	C5H11N3O2	[M+H]+	4-Guanidinobutyric acid	Organic acids	Organic acids	463-00-3	B	1559600	1068900	1199800	979867	333777	883707	1.21767e+06
mws0017	146.2	145.158	C7H19N3	[M+H]+	Spermidine	Alkaloids	Phenolamine	124-20-9	A	440990	304120	333290	208020	370263	275463	207997
pme0193	147.07	146.069	C5H10N2O3	[M+H]+	L-Glutamine	Amino acids and derivatives	Amino acids and derivatives	56-85-9	B	1706700	1151600	1408700	1761900	600293	1032960	456880
pme0026	147	146.106	C6H14N2O2	[M+H]+	L-(+)-Lysine	Amino acids and derivatives	Amino acids and derivatives	56-87-1	B	1675500	1070600	1236600	1.58207e+06	557197	945713	426997
mws1050	148.05	147.053	C5H9NO4	[M+H]+	O-Acetylserine	Amino acids and derivatives	Amino acids and derivatives	5147-00-2	B	288400	202060	218620	143643	127013	112790	148300
mws1706	148.1	147.053	C5H9NO4	[M+H]+	Glutamic acid	Amino acids and derivatives	Amino acids and derivatives	617-65-2	A	74305000	54403000	55885000	50357000	5.00527e+07	43883000	3.73157e+07
pmp1285	149.02	148.016	C8H4O3	[M+H]+	Phthalic anhydride	Phenolic acids	Phenolic acids	85-44-9	A	318300	275060	297970	201403	202010	254577	323320
mws1024	147.1	148.052	C9H8O2	[M-H]-	p-Coumaraldehyde	Phenolic acids	Phenolic acids	2538-87-6	B	9165.7	16840	13269	30911	8782.9	9065.93	11625.9
mws2213	147.05	148.052	C9H8O2	[M-H]-	Cinnamic acid	Phenolic acids	Phenolic acids	140-10-3	B	13893	15025	11762	17133.7	23917	7476.57	8887.37
pme1210	150	149.051	C5H11NO2S	[M+H]+	L-Methionine	Amino acids and derivatives	Amino acids and derivatives	63-68-3	B	3451800	2229300	2549400	3.11957e+06	542057	1804690	667970
mws0847	150	149.07	C6H7N5	[M+H]+	1-Methyladenine	Nucleotides and derivatives	Nucleotides and derivatives	5142-22-3	B	112800	78670	86687	94259.3	9	53985.3	21575.3
mws0262	149	150.016	C4H6O6	[M-H]-	L-(+)-Tartaric acid	Organic acids	Organic acids	87-69-4	B	49741	57170	63780	67967.7	53577	64900	31094
pmp0468	151.03	150.032	C8H6O3	[M+H]+	Piperonal	Phenolic acids	Phenolic acids	120-57-0	B	39219	33528	28365	9	9	36251	72191
pme2019	149	150.053	C5H10O5	[M-H]-	DL-Arabinose	Others	Saccharides and Alcohols	147-81-9	B	444890	551800	619640	743010	475527	553773	435963
pme3305	149	150.068	C9H10O2	[M-H]-	p-Coumaryl alcohol	Phenolic acids	Phenolic acids	3690-05-9	B	91248	133920	103650	282000	228613	52057	43266.7
pme0183	152.1	151.049	C5H5N5O	[M+H]+	2-Hydroxy-6-aminopurine	Nucleotides and derivatives	Nucleotides and derivatives	3373-53-3	B	155720	162550	125360	185023	106558	149607	76268.7
pme1109	152	151.049	C5H5N5O	[M+H]+	Guanine	Nucleotides and derivatives	Nucleotides and derivatives	73-40-5	A	457980	332680	342870	282207	220173	293723	124347
mws0458	151.05	152.047	C8H8O3	[M-H]-	Vanillin	Phenolic acids	Phenolic acids	121-33-5	B	838630	1009200	909370	1.06417e+06	383983	1.89863e+06	625350
mws0438	151.15	152.069	C5H12O5	[M-H]-	L-Arabitol	Others	Saccharides and Alcohols	7643-75-6	B	22954	23956	28028	27454	22211.3	27021	30483
mws0437	151.15	152.069	C5H12O5	[M-H]-	D-Arabitol	Others	Saccharides and Alcohols	488-82-4	B	15733	27248	24416	25223	22703.3	23887	26398
mws0183	153.1	154.027	C7H6O4	[M-H]-	Protocatechuic acid	Flavonoids	Flavanols	99-50-3	B	302220	442960	506600	9	848043	382103	270283
pmn1575	153	154.027	C7H6O4	[M-H]-	Gentisic acid	Phenolic acids	Phenolic acids	490-79-9	A	355440	463340	501310	9	856250	406433	310353
mws0639	153.2	154.027	C7H6O4	[M-H]-	2,3-Dihydroxybenzoic Acid	Organic acids	Organic acids	303-38-8	B	371020	485220	529450	9	808677	404517	320353
pmb3099	153	154.04	C4H11O4P	[M-H]-	Diethyl phosphate	Organic acids	Organic acids	598-02-7	B	176350	227220	205760	231717	289040	253103	284913
mws0254	156.1	155.07	C6H9N3O2	[M+H]+	L-Histidine	Amino acids and derivatives	Amino acids and derivatives	71-00-1	A	1326100	1020800	1048000	1.30875e+06	324097	1.15212e+06	405753
pme3382	160	161.069	C6H11NO4	[M-H]-	N-Acetylthreonine	Amino acids and derivatives	Amino acids and derivatives	17093-74-2	B	24944	30304	30355	37788.7	32475.3	37072.3	24807.3
pmf0608	161.03	162.032	C9H6O3	[M-H]-	Oxalic acid	Phenolic acids	Phenolic acids	93-35-6	B	10626000	13247000	14074000	6.65227e+06	1.17523e+07	1.16827e+07	1.62637e+07
pme2914	161	162.053	C6H10O5	[M-H]-	3-Hydroxy-3-methylpentane-1,5-dioic acid	Amino acids and derivatives	Amino acids and derivatives	503-49-1	B	750880	1059500	1041700	932323	773897	913780	1.61903e+06
pmf0440	163.1	162.068	C10H10O2	[M+H]+	4-MethoxycinnaMaldehyde	Phenolic acids	Phenolic acids	1963-36-6	B	103260	98523	100280	88770	101872	87686.3	120683
mws0159	163.05	164.047	C9H8O3	[M-H]-	Phenylpyruvic acid	Organic acids	Organic acids	156-06-9	B	190760	266340	286330	387163	223563	172153	128402
pme1436	163.05	164.047	C9H8O3	[M-H]-	p-Coumaric acid	Phenolic acids	Phenolic acids	501-98-4	B	409860	503460	478050	614770	484467	412657	593493
pme2617	166	165.046	C5H11NO3S	[M+H]+	Methionine sulfoxide	Amino acids and derivatives	Amino acids and derivatives	62697-73-8	B	2772800	1975800	1966000	1398800	1.64077e+06	1.29137e+06	1.41073e+06
pmp1213	166.08	165.079	C9H11NO2	[M+H]+	Phenylalanine	Amino acids and derivatives	Amino acids and derivatives	63-91-2	A	47686000	46781000	45897000	4.98747e+07	4.79657e+07	4.32713e+07	3.40657e+07
pme0281	165.03	166.027	C8H6O4	[M-H]-	Terephthalic acid	Phenolic acids	Phenolic acids	100-21-0	A	614180	790080	690670	1.20603e+06	880840	882360	657613
mws0344	165.05	166.048	C5H10O6	[M-H]-	D-Xylonic acid	Organic acids	Organic acids	526-91-0	A	5082800	6799600	6292800	9040600	6.87417e+06	7.85533e+06	5.22857e+06
mws0467	165.06	166.063	C9H10O3	[M-H]-	3-(4-Hydroxyphenyl)-propionic acid	Phenolic acids	Phenolic acids	501-97-3	B	198840	243250	243980	269587	207760	235933	198487
Hmbp1276	169.05	168.042	C8H8O4	[M+H]+	Gallacetophenone	Others	Others	528-21-2	B	464450	545510	610500	9	9	432810	843370
mws0028	167	168.042	C8H8O4	[M-H]-	Vanillic acid	Phenolic acids	Phenolic acids	121-34-6	B	376120	525480	456210	52051	87294.7	418140	699873
pme1383	170.1	169.074	C8H11NO3	[M+H]+	Pyridoxine	Others	Vitamin	65-23-6	A	1670600	1510600	1571700	584420	873320	1.14504e+06	1523400
pme0124	173.2	172.085	C7H12N2O3	[M+H]+	Glycyl-L-proline	Amino acids and derivatives	Amino acids and derivatives	704-15-4	B	7561	4777.4	6867.7	6477.93	4486.7	5072.13	4066.5
pme3009	175	174.016	C6H6O6	[M+H]+	Trans-Citridic acid	Organic acids	Organic acids	4023-65-8	B	68441	37900	37246	31063.3	30253.7	31245.7	27210.7
mws1401	175	174.1	C7H14N2O3	[M+H]+	L-theanine	Amino acids and derivatives	Amino acids and derivatives	3081-61-6	B	31246	26161	35102	12971	9	12033.7	37227
mws0260	175	174.112	C6H14N4O2	[M+H]+	L-(+)-Arginine	Amino acids and derivatives	Amino acids and derivatives	74-79-3	B	877800	702770	830350	823687	341187	688263	305087
pme0008	176.1	175.096	C6H13N3O3	[M+H]+	L-Citrulline	Amino acids and derivatives	Amino acids and derivatives	372-75-8	B	598140	512450	598690	432503	368857	305393	294177
Hmfn531	175.03	176.033	C6H8O6	[M-H]-	L-Ascorbic acid	Others	Vitamin	50-81-7	B	100580	96995	108720	146733	129650	118750	104561
pme2253	177.14	178.048	C6H10O6	[M-H]-	L-Gulonic-γ-lactone	Others	Saccharides and Alcohols	1128-23-0	B	142780	149740	163150	199640	159530	172113	77593.7
mws1195	179.1	178.063	C10H10O3	[M+H]+	Methyl p-coumarate	Phenolic acids	Phenolic acids	3943-97-3	A	2854600	2962100	2767800	415510	142050	1.00198e+06	8.19477e+06
mws1200	177	178.063	C10H10O3	[M-H]-	Trans-4-Hydroxycinnamic Acid Methyl Ester	Phenolic acids	Phenolic acids	19367-38-5	A	3762800	4245800	3847800	686020	216677	1.65583e+06	1.17712e+07
pmn1682	179.03	180.042	C9H8O4	[M-H]-	Sorbic acid	Phenolic acids	Phenolic acids	110-44-1	A	3386400	4518700	4450000	4.71523e+06	5.24477e+06	2.83687e+06	3913900
mws2212	179.04	180.042	C9H8O4	[M-H]-	Caffeic acid	Phenolic acids	Phenolic acids	331-39-5	A	5189100	6495600	6504900	7294100	7.47283e+06	4.30523e+06	6.52363e+06
mws4170	179.06	180.063	C6H12O6	[M-H]-	D-Glucose	Others	Saccharides and Alcohols	14431-43-7	A	10129000	15903000	12956000	20553000	1.03833e+07	13768000	7.93963e+06
mws0198	179	180.063	C6H12O6	[M-H]-	D-(+)-Glucose	Others	Saccharides and Alcohols	50-99-7	A	6485600	6936600	5867900	9.37717e+06	5.42923e+06	6419100	3794300
pme0516	179.16	180.063	C6H12O6	[M-H]-	Inositol	Others	Saccharides and Alcohols	87-89-8	B	947540	1040600	967620	594797	1.20813e+06	1.39827e+06	1.77953e+06
mws0250	182.1	181.074	C9H11NO3	[M+H]+	L-(-)-Tyrosine	Amino acids and derivatives	Amino acids and derivatives	60-18-4	A	17691000	17913000	17649000	2.33187e+07	1.00029e+07	8979700	4.31283e+06
mws1350	181.06	182.058	C9H10O4	[M-H]-	Syringic Aldehyde	Phenolic acids	Phenolic acids	134-96-3	B	47426	58305	57819	60924.3	44113.7	23876	85664
Lmyn0239	181.07	182.079	C6H14O6	[M-H]-	Cordycepic acid	Others	Saccharides and Alcohols	69-65-8	B	163640	220070	255240	234310	159950	255473	155023
mws0214	181	182.079	C6H14O6	[M-H]-	D-Sorbitol	Others	Saccharides and Alcohols	50-70-4	B	60584	94206	81394	101826	67352.3	100026	61923.3
pme2237	181.08	182.079	C6H14O6	[M-H]-	Dulcitol	Others	Saccharides and Alcohols	608-66-2	B	35737	46960	40292	51737.7	9	55378.3	54954.3
pme2596	184.05	183.053	C8H9NO4	[M+H]+	4-Pyridoxic acid	Others	Vitamin	82-82-6	B	53521	49040	57614	44696	20988.7	45193.7	53655.3
pmn1492	187.1	188.047	C11H8O3	[M-H]-	Ayapin	Lignans and Coumarins	Coumarins	494-56-4	A	110700	123210	126830	121426	74135	70154	170607
pme0137	187.2	188.08	C7H12N2O4	[M-H]-	N-α-Acetyl-L-glutamine	Amino acids and derivatives	Amino acids and derivatives	2490-97-3	B	407130	397610	463570	961400	555140	565710	274477
pmn1380	187.1	188.105	C9H16O4	[M-H]-	Eucommiol	Others	Others	55930-44-4	A	180580	201200	215260	220463	117447	118749	268903
mws0237	187.1	188.105	C9H16O4	[M-H]-	Anchoic Acid	Organic acids	Organic acids	123-99-9	A	1815700	2060700	2014100	2164400	1.20477e+06	1.15564e+06	2.87307e+06
mws0736	189.1	188.116	C8H16N2O3	[M+H]+	N-Glycyl-L-leucine	Amino acids and derivatives	Amino acids and derivatives	869-19-2	B	60949	61275	58814	41540	70096.7	33483	37941
pme0122	189.2	188.116	C8H16N2O3	[M+H]+	N6-Acetyl-L-lysine	Amino acids and derivatives	Amino acids and derivatives	692-04-6	B	550320	538470	532580	1436200	192947	315957	218483
pme0278	191.09	190.095	C7H14N2O4	[M+H]+	2,6-Diaminooimelic acid	Amino acids and derivatives	Amino acids and derivatives	583-93-7	B	76308	73927	94130	103226	51995.3	59560	53345.7
mws0281	191	192.027	C6H8O7	[M-H]-	Citric Acid	Organic acids	Organic acids	77-92-9	B	8743200	20721000	21848000	19726000	1.75347e+07	1.62283e+07	2.20447e+07
Hmjp2337	193.04	192.033	C10H8O4	[M+H]+	isoscopoletin	Lignans and Coumarins	Coumarins	-	A	5432500	6459400	5449500	6.51943e+06	2.75777e+06	5675800	4296300
pme2993	193.1	192.042	C10H8O4	[M+H]+	Scopoletin(7-Hydroxy-5-methoxycoumarin)	Lignans and Coumarins	Coumarins	92-61-5	A	555690	636070	719800	309533	255650	609417	1276200
Hmcp2123	193.05	192.042	C10H8O4	[M+H]+	6-hydroxy-7-methoxycoumarin	Others	Others	776-86-3	A	551960	596170	583270	257777	216207	524673	1.05948e+06
Hmdp2169	193.05	192.043	C10H8O4	[M+H]+	6-hydroxy-7-methoxy-coumarin	Others	Others	-	A	723000	895590	810620	366567	287863	786870	1.57647e+06
mws0277	191	192.063	C7H12O6	[M-H]-	Kinic acid	Organic acids	Organic acids	77-95-2	A	21624000	26316000	27999000	3.49323e+07	3.07067e+07	2.40917e+07	2.50717e+07
mws1213	193.1	194.043	C6H10O7	[M-H]-	Aldehydo-D-galacturonate	Organic acids	Organic acids	685-73-4	B	436390	485080	452180	661463	444173	493617	315183
pme3705	193.14	194.043	C6H10O7	[M-H]-	D-Glucoronic acid	Others	Saccharides and Alcohols	6556-12-3	B	396980	415640	465690	570330	410747	507003	309490
pmb0423	193.1	194.058	C10H10O4	[M-H]-	Hydroxy-methoxycinnamate	Phenolic acids	Phenolic acids	-	B	42550	55287	56090	40542.3	55421.3	78525.7	68906.3
mws0014	193.06	194.058	C10H10O4	[M-H]-	Ferulic acid	Phenolic acids	Phenolic acids	1135-24-6	A	36813	54732	54379	57426	42682	70236.3	45600.7
pme0534	195.16	196.058	C6H12O7	[M-H]-	Gluconic acid	Others	Saccharides and Alcohols	526-95-4	B	432330	480580	492650	818660	565877	554877	286653
pme3827	198.2	197.069	C9H11NO4	[M+H]+	3,4-Dihydroxy-DL-phenylalanine	Amino acids and derivatives	Amino acids and derivatives	63-84-3	B	240950	292670	165230	300273	143330	84039.7	38094.3
pme1419	164	199.032	C6H14ClNO2S	[M-Cl]+	L-Methionine methyl ester	Amino acids and derivatives	Amino acids and derivatives	2491-18-1	B	58867	58500	51779	39222.3	93680	18992	12674
Lmzn2605	201.11	202.101	C10H18O4	[M-H]-	Sebacic acid	Others	Others	111-20-6	B	9508.3	9871.8	12054	8538.87	8207.13	7774.97	14611
pmp0967	205.1	204.09	C11H12N2O2	[M+H]+	Tryptophan	Amino acids and derivatives	Amino acids and derivatives	73-22-3	A	37328000	37798000	37314000	40826000	3.20217e+07	27004000	1.55042e+07
mws1212	209.1	208.074	C11H12O4	[M+H]+	Methyl ferulate	Phenolic acids	Phenolic acids	2309-07-1	A	567210	611810	633310	145727	116183	607720	552157
pme3443	207.1	208.074	C11H12O4	[M-H]-	Sinapinaldehyde	Phenolic acids	Phenolic acids	4206-58-0	B	25408	26945	29918	11873.6	36362.3	10805.4	40056.3
pmb2620	207.1	208.074	C11H12O4	[M-H]-	3,4-Dimethoxycinnamic acid	Phenolic acids	Phenolic acids	14737-89-4	A	403660	438740	421620	98394.7	79480.3	461107	392670
pme0109	212.2	211.084	C10H13NO4	[M+H]+	(-)-3-(3,4-Dihydroxyphenyl)-2-methylalanine	Amino acids and derivatives	Amino acids and derivatives	555-30-6	B	196220	220600	204320	320053	73816.3	217887	222997
mws1337	220.2	219.111	C9H17NO5	[M+H]+	D-Pantothenic Acid	Others	Vitamin	79-83-4	A	7709400	7731700	7865800	7.58563e+06	6.48627e+06	7.10103e+06	7.17943e+06
pme1228	221.1	220.085	C11H12N2O3	[M+H]+	5-Hydroxy-L-tryptophan	Amino acids and derivatives	Amino acids and derivatives	56-69-9	B	18441	11237	16793	20866	17713	10877.1	13040.3
pme1194	228	227.091	C9H13N3O4	[M+H]+	Deoxycytidine	Nucleotides and derivatives	Nucleotides and derivatives	951-77-9	B	51763	57858	41639	40192.7	45629	48570.7	83348.3
mws0119	227.2	228.209	C14H28O2	[M-H]-	Myristic Acid	Lipids	Free fatty acids	544-63-8	A	616450	683160	613210	666130	545287	596063	1128430
mws4176	237.12	236.116	C12H16N2O3	[M+H]+	DL-Alanyl-DL-phenylalanine	Amino acids and derivatives	Amino acids and derivatives	1999-45-7	B	89731	97993	85056	101950	189140	52245	38737
pme0264	243.09	242.09	C10H14N2O5	[M+H]+	Thymidine	Nucleotides and derivatives	Nucleotides and derivatives	50-89-5	B	60164	45020	47114	49302.3	24351.3	31798.3	61177.7
pme3732	244.09	243.086	C9H13N3O5	[M+H]+	Cytidine	Nucleotides and derivatives	Nucleotides and derivatives	65-46-3	B	1540700	1586300	1569600	1073460	1705200	2.05567e+06	1.06539e+06
mws0976	243	244.07	C9H12N2O6	[M-H]-	β-Pseudouridine	Nucleotides and derivatives	Nucleotides and derivatives	1445-07-4	B	24449	28866	33593	8253	23860.7	45694.3	9
mws0248	243.1	244.07	C9H12N2O6	[M-H]-	Uridine	Nucleotides and derivatives	Nucleotides and derivatives	58-96-8	A	148480	206670	229210	143067	271127	339613	209053
pmb2591	245	246.1	C13H14N2O3	[M-H]-	Acetyltryptophan	Amino acids and derivatives	Amino acids and derivatives	2280-01-5	B	19376	30634	18713	9	9	43694.3	14787.8
pmn1578	255.23	256.24	C16H32O2	[M-H]-	Hexadecanoic acid	Phenolic acids	Phenolic acids	57-10-3	A	1437500	1412900	1521600	1.33043e+06	1314100	2.01253e+06	2.00653e+06
mws1090	259	260.03	C6H13O9P	[M-H]-	Glucose-1-phosphate	Others	Saccharides and Alcohols	59-56-3	A	440340	553290	557680	567903	366597	241033	954880
mws0866	259	260.03	C6H13O9P	[M-H]-	D-Glucose 6-phosphate	Others	Saccharides and Alcohols	56-73-5	B	465280	644490	598170	738447	361903	302697	1.02718e+06
pme1184	268.1	267.097	C10H13N5O4	[M+H]+	Deoxyguanosine	Nucleotides and derivatives	Nucleotides and derivatives	961-07-9	B	42086	52445	38973	21101.7	39539.3	28707	50677
pme0230	268.1	267.097	C10H13N5O4	[M+H]+	Adenosine	Nucleotides and derivatives	Nucleotides and derivatives	58-61-7	A	30836000	31915000	32233000	2.93877e+07	3.25133e+07	3.47283e+07	28332000
mws1060	267.08	268.081	C10H12N4O5	[M-H]-	9-(β-D-Arabinofuranosyl)hypoxanthine	Nucleotides and derivatives	Nucleotides and derivatives	7013-16-3	A	29865	30043	46010	44803	32166.3	51584.3	37843.3
mws1297	269.1	270.11	C13H18O6	[M-H]-	Benzyl β-D-Glucopyranoside	Phenolic acids	Phenolic acids	4304-12-5	A	12765	13139	16737	27053.3	9	9947.33	26950.3
mws0914	271	272.069	C15H12O5	[M-H]-	Pinobanksin	Flavonoids	Dihydroflavonol	548-82-3	B	10563	13753	10873	4563	14080	3381.33	14637
mws1140	271.07	272.069	C15H12O5	[M-H]-	Naringenin chalcone(4,2',4',6'-Tetrahydroxychalcone)	Flavonoids	Chalcones	73692-50-9	B	11598	11620	11312	6247.37	12709	12120.7	14144.2
pmp1264	274.28	273.267	C16H35NO2	[M+H]+	Hexadecylsphingosine	Lipids	Sphingolipids	-	A	2215200	2594000	2942600	2646500	2775200	2904700	3.23653e+06
mws1038	277.13	278.13	C11H22N2O4S	[M-H]-	(R)-Pantetheine	Others	Others	496-65-1	A	55156	24978	34292	48395.7	71265	67055.3	52547.7
pmp1230	279.2	278.152	C16H22O4	[M+H]+	Senkyunolide M	Others	Others	-	A	543750	545570	613540	627640	587580	653947	797850
mws5035	279.17	278.163	C15H22N2O3	[M+H]+	Leucylphenylalanine	Amino acids and derivatives	Amino acids and derivatives	56217-82-4	B	70914	73130	83868	51420.7	107743	48159.7	37203.3
pmb0889	279.3	278.225	C18H30O2	[M+H]+	Punicic acid	Lipids	Free fatty acids	544-72-9	B	568040	593030	571510	600323	414153	462840	492003
mws0366	277.22	278.225	C18H30O2	[M-H]-	γ-Linolenic Acid	Lipids	Free fatty acids	506-26-3	B	5479700	4011900	6407600	3279200	6.00443e+06	8.26133e+06	5.92117e+06
mws0629	281.3	280.106	C13H16N2O5	[M+H]+	Asp-phe	Amino acids and derivatives	Amino acids and derivatives	13433-09-5	B	58318	61741	64682	74020.3	46450.7	51548	65799
mws1491	279.2	280.24	C18H32O2	[M-H]-	Linoleic acid	Lipids	Free fatty acids	60-33-3	A	419090	539920	462760	564493	566980	527513	563533
YC512118	282.28	281.272	C18H35NO	[M+H]+	Octadecenoic amide	Others	Others	-	A	48287	39169	67152	33258.7	53862.3	53515.7	54541.7
mws2623	281.25	282.256	C18H34O2	[M-H]-	11-Octadecanoic acid(Vaccenic acid)	Lipids	Free fatty acids	506-17-2	A	111310	140240	90983	103475	116333	95683	213367
pme1178	284.09	283.092	C10H13N5O5	[M+H]+	Guanosine	Nucleotides and derivatives	Nucleotides and derivatives	118-00-3	A	5567600	6226300	6696700	4.29787e+06	5.57963e+06	8167700	5234800
pmp0460	284.1	283.121	C17H17NO3	[M+H]+	N-cis-Paprazine	Alkaloids	Phenolamine	-	B	194310	232430	264040	497897	507417	36886.6	9079.13
pmn1729	282.11	283.121	C17H17NO3	[M-H]-	N-z-p-Coumaroyl tyramine	Alkaloids	Phenolamine	-	A	105690	122370	119390	250654	250618	14737	2804.6
pmp1178	284.1	283.121	C17H17NO3	[M+H]+	N-cis-sinapoyltyramine	Alkaloids	Phenolamine	-	B	229230	261700	318250	583047	553283	44141.9	9602.73
mws0668	283	284.076	C10H12N4O6	[M-H]-	Xanthosine	Nucleotides and derivatives	Nucleotides and derivatives	146-80-5	B	73349	96162	82112	68740.7	72982.7	94377.3	120283
pme3473	271.07	286.048	C15H10O6	[M-H]-	Butin	Flavonoids	Flavonoid	-	B	14045	12803	13149	6540.17	14765.7	10370.6	13845
mws1521	285.1	286.105	C13H18O7	[M-H]-	Salicin	Phenolic acids	Phenolic acids	138-52-3	B	187610	230500	268290	999940	118350	63772.7	40065.7
pme2963	287.06	288.063	C15H12O6	[M-H]-	Aromadedrin (Dihydrokaempferol)	Flavonoids	Flavonoid	-	A	11299	9350.3	11055	2748.6	10423	10023.4	18464.5
pmb3081	289.1	290.004	C6H11PO11	[M-H]-	Glucarate O-Phosphoric acid	Others	Saccharides and Alcohols	-	B	3012200	2637600	4242200	5.23743e+06	4002100	2.93673e+06	3.60767e+06
pme0460	291	290.079	C15H14O6	[M+H]+	L-Epicatechin	Flavonoids	Flavanols	490-46-0	B	54964	67369	89212	3079.03	183783	22198.7	116738
pmb2787	293.2	294.22	C18H30O3	[M-H]-	9-KODE	Lipids	Free fatty acids	54232-59-6	B	9260.4	7356.8	6886.2	9313.1	8854.77	10350.4	9626.17
pmb2786	293	294.22	C18H30O3	[M-H]-	9-HOTrE	Lipids	Free fatty acids	89886-42-0	B	34962	42871	45064	41939.3	43517	57127.7	44999.7
pmb2792	293	294.22	C18H30O3	[M-H]-	13-HOTrE(r)	Lipids	Free fatty acids	74784-20-6	B	99736	125770	121470	86620	89694.7	93548.7	97898
Lmhn2068	295.05	296.053	C13H12O8	[M-H]-	caffeoylmalic acid	Phenolic acids	Phenolic acids	-	B	26093	28792	32392	147297	9	20945.7	13968
Rfmb0901	295.23	296.235	C18H32O3	[M-H]-	9-Hydroxy-10,12-octadecadienoic acid	Lipids	Free fatty acids	15514-85-9	A	208900	235020	228030	252700	182883	252610	240473
pmn1688	295.23	296.235	C18H32O3	[M-H]-	9S-Hyroxy-10E,12E-octadecadienoic acid	Lipids	Free fatty acids	-	A	206950	228510	230120	254493	187203	262703	243963
pmb2778	295	296.235	C18H32O3	[M-H]-	9,10-EODE	Lipids	Free fatty acids	65167-83-1	A	823850	903060	894490	948193	610413	1057590	991627
pme1474	298	297.09	C11H15N5O3S	[M+H]+	5'-Deoxy-5'-(methylthio)adenosine	Nucleotides and derivatives	Nucleotides and derivatives	2457-80-9	A	10929000	11811000	12053000	7.24547e+06	1.61023e+07	7286700	12561000
mws0724	298.1	299.087	C10H13N5O6	[M-H]-	8-Hydroxyguanosine	Nucleotides and derivatives	Nucleotides and derivatives	3868-31-3	B	48884	51790	42624	76047	51713	42409.7	32841
Zmhp3514	301.07	300.063	C16H12O6	[M+H]+	6,7,8-tetrahydroxy-5-methoxyflavone	Flavonoids	Flavonoid	-	B	25099	32706	20996	9	9	99849.3	9
Zmxn1862	299.08	300.084	C13H16O8	[M-H]-	Salicylic acid O-glycoside	Phenolic acids	Phenolic acids	-	A	6030400	8064500	7956800	9	235103	3.30983e+06	1.63513e+07
Zmxn1997	299.08	300.084	C13H16O8	[M-H]-	isosalicylic acid O-glycoside	Phenolic acids	Phenolic acids	-	A	5535600	6296900	7204600	9	227030	4366200	16699000
Hmtn1302	299.08	300.085	C13H16O8	[M-H]-	glucosyloxybenzoic acid	Phenolic acids	Phenolic acids	-	A	2596200	2932700	3174000	5.41367e+06	1.25917e+06	6.13557e+06	1.90893e+06
pmb0563	301.1	301.071	C16H13O6	[M]+	Peonidin	Flavonoids	Anthocyanins	134-01-0	A	2686000	3989200	3905900	5418400	1.82817e+06	172826	1.20397e+06
Hmyp2315	303.04	302.042	C15H10O7	[M+H]+	3,5,7,4,- tetrahydroxy-Coumaronochromone	Others	Others	-	A	53218	53252	58278	51317.7	128337	10030.4	9
mws0920	301	302.043	C15H10O7	[M-H]-	Tricetin	Flavonoids	Flavonoid	520-31-0	B	73365	89657	91906	10777	180100	50532	9
mws1375	304.15	303.143	C12H21N3O6	[M+H]+	Nicotianamine	Amino acids and derivatives	Amino acids and derivatives	34441-14-0	B	577950	573100	496340	594033	470293	526077	546347
Lmhn3074	309.06	310.069	C14H14O8	[M-H]-	feruloylmalic acid	Phenolic acids	Phenolic acids	-	B	41624	75499	93742	42836.3	27945.7	99792	55421.7
pme3967	312	311.123	C12H17N5O5	[M+H]+	2-(Dimethylamino)guanosine	Nucleotides and derivatives	Nucleotides and derivatives	2140-67-2	A	3471100	4384500	5444200	4.87507e+06	3.09983e+06	1897500	8.95957e+06
Lmhn1477	311.04	312.048	C13H12O9	[M-H]-	Caffeoyltartaric acid (Caftaric acid)	Phenolic acids	Phenolic acids	67879-58-7	B	23555	34820	37696	38945	27084.3	15189.3	59078
mad1395	311.08	312.048	C13H12O9	[M-H]-	Caffeoyl-pentose	Phenolic acids	Phenolic acids	-	B	10679	14856	16165	19873	12499	4795.87	26204.7
Rfmb0871	311.22	312.23	C18H32O4	[M-H]-	13-Oxo-9-hydroxy-10-octadecenoic acid	Lipids	Free fatty acids	-	A	253600	295280	301740	314693	195097	382231	225773
pmp1256	314.14	313.131	C18H19NO4	[M+H]+	N-Cis-feruloyltyramine	Alkaloids	Phenolamine	80510-09-4	A	113880	134870	186890	288142	290400	38916.3	47059
pmp1255	314.14	313.131	C18H19NO4	[M+H]+	N-Trans-feruloyltyramine	Alkaloids	Phenolamine	66648-43-9	A	101510	109130	163020	257770	246203	29366	38781.7
pmp1200	314.1	313.131	C18H19NO4	[M+H]+	Methoxy-N-Caffeoyltyramine	Alkaloids	Phenolamine	-	A	50352	56529	98135	137679	149072	19436.3	24326.9
pmb2871	315.1	316.079	C13H16O9	[M-H]-	2,5-Dihydroxy benzoic acid O-hexside	Phenolic acids	Phenolic acids	-	A	704000	1205800	1221600	649030	458927	2.05173e+06	920663
Hmtn1120	315.11	316.116	C14H20O8	[M-H]-	5-(2-hydroxyethyl)-2-O-glucosylohenol	Phenolic acids	Phenolic acids	-	B	583530	702890	730410	864353	62389.3	1.08901e+06	764043
Lmzp3276	318.3	317.292	C18H39NO3	[M+H]+	2-amino-octadecane-1，3，4-triol	Others	Others	-	A	258420	258070	317500	341157	315103	306363	327910
pmb2221	318.3	317.293	C18H39NO3	[M+H]+	4-Hydroxysphinganine	Lipids	Sphingolipids	554-62-1	A	119410	116870	114410	139733	146197	123747	166363
mws0582	322.4	321.1	C11H19N3O6S	[M+H]+	S-(methyl)glutathione	Amino acids and derivatives	Amino acids and derivatives	2922-56-7	B	30674	47468	38535	43443.3	27620.7	36773	21908
pme3188	323	324.036	C9H13N2O9P	[M-H]-	Uridine 5'-monophosphate	Nucleotides and derivatives	Nucleotides and derivatives	58-97-9	A	80085	101120	90521	69389.7	118934	115471	124833
pmf0359	325.08	324.085	C15H16O8	[M+H]+	Skimmin	Lignans and Coumarins	Coumarins	93-39-0	A	3210400	4261500	4942500	2.05773e+06	246593	8.48267e+06	11504000
pmn1419	325.09	326.1	C15H18O8	[M-H]-	1-O-[(E)-p-Cumaroyl]-β-D-glucopyranose	Phenolic acids	Phenolic acids	-	B	36773	39656	35020	81470.3	42108.7	57017	23140.7
Zmxn2709	325.09	326.1	C15H18O8	[M-H]-	p-Coumaric acid-O-glycoside	Phenolic acids	Phenolic acids	-	B	50573	52514	55019	16017	9	51110.3	114717
Lmtn2233	327.11	328.116	C15H20O8	[M-H]-	androsin	Others	Others	531-28-2	B	157250	207470	221790	36463.3	9	650433	164180
pmn1691	327.22	328.225	C18H32O5	[M-H]-	9,12,13-Trihyroxy-10,15-octadecadienoic acid	Lipids	Free fatty acids	-	A	37187	43315	38935	37527	47644.7	42911.3	31898.3
HmLn6021	327.22	328.225	C18H32O5	[M-H]-	oxylipin	Others	Others	-	A	103930	114950	115540	117160	126297	105416	74331.3
mws0884	328.1	329.053	C10H12N5O6P	[M-H]-	Cyclic AMP	Nucleotides and derivatives	Nucleotides and derivatives	60-92-4	A	28727	30597	37365	27361.3	42314.3	49697.7	28718.7
pmb3894	329.1	330.074	C17H14O7	[M-H]-	Di-O-methylquercetin	Flavonoids	Flavonols	2068-02-2	A	652490	746070	747420	879440	844340	548140	497100
pmb2850	329	330.074	C17H14O7	[M-H]-	Tricin	Flavonoids	Flavonoid	-	A	21969	19733	25638	23435	11682	23975	15407
Lmgn3181	329.07	330.075	C17H14O7	[M-H]-	5,7-dihydroxy-2'-methoxy-3 ', 4'-methyleneoxy-dihydro isoflavone	Flavonoids	Flavonoid	-	B	17427	19004	22314	21017.8	9	18406	15729.3
Zmhn1883	329.09	330.095	C14H18O9	[M-H]-	Vanillic acid glycoside	Phenolic acids	Phenolic acids	-	A	432230	574710	572070	9868.5	9	773107	1.12993e+06
Lmtn2565	329.11	330.095	C14H18O9	[M-H]-	1'-O-vanilloyl-β-D-glucoside	Phenolic acids	Phenolic acids	-	A	277290	328200	272270	89288	98474.3	518590	489293
HmLn2358	329.09	330.095	C14H18O9	[M-H]-	Vanilloy β-D-glucoside	Others	Others	-	A	779990	939090	1004800	26723.7	26528.7	1138750	1.86877e+06
Zmhn1375	329.09	330.096	C14H18O9	[M-H]-	vanillic acid-C-glucoside	Others	Others	-	A	511020	652790	656430	9292	9	749800	1.28417e+06
pmn1517	329.1	330.132	C15H22O8	[M-H]-	3,4,5-Trimethoxyphenyl-β-D-Glucopyranoside	Phenolic acids	Phenolic acids	-	B	6770400	7895700	7879400	1.96253e+06	2.25133e+06	1.21875e+07	1.23453e+07
pmn1694	329.23	330.241	C18H34O5	[M-H]-	9,10,13-Trihyroxy-11-octadecadienoic acid	Lipids	Free fatty acids	-	A	720690	839900	775630	931193	891500	596940	542863
pmn1495	329.2	330.277	C19H38O4	[M-H]-	Hexadecanoic acid 2,3-dihydroxypropyl ester	Lipids	Glycerol ester	542-44-9	A	753970	871370	781060	998147	927743	673717	577087
pme3184	332	331.068	C10H14N5O6P	[M+H]+	2'-Deoxyadenosine-5'-monophosphate	Nucleotides and derivatives	Nucleotides and derivatives	653-63-4	B	292390	345950	408300	429807	417690	323647	589207
pmb0549	331.08	331.081	C17H15O7+	[M]+	Malvidin	Flavonoids	Anthocyanins	643-84-5	B	14996	10840	16536	10925	7070.8	15257.7	39644.3
HmLn0873	331.07	332.075	C13H16O10	[M-H]-	2-O-galloyl-β-D- glucose	Phenolic acids	Phenolic acids	-	B	134580	185590	239040	198923	101296	295340	251540
mws0675	335.1	334.057	C11H15N2O8P	[M+H]+	β-Nicotinamide mononucleotide	Nucleotides and derivatives	Nucleotides and derivatives	1094-61-7	B	610290	616700	696320	553430	795877	856293	676037
pmb3074	337.1	338.1	C16H18O8	[M-H]-	3-O-p-Coumaroyl quinic acid	Phenolic acids	Phenolic acids	1899-30-5	A	46867000	49723000	48814000	10549900	13042000	5.22873e+07	5.88803e+07
mws1015	339.1	340.079	C15H16O9	[M-H]-	Esculin(6,7-DihydroxyCoumarin-6-glucoside)	Lignans and Coumarins	Coumarins	531-75-9	A	114160	110460	140500	125047	74723	79074.3	141136
mws5040	365.11	341.108	C12H21O11Na	[M+H]+	Turanose	Others	Saccharides and Alcohols	547-25-1	B	20563000	16279000	21084000	15052000	1.70203e+07	1.88997e+07	1.77823e+07
mws0380	341.11	342.116	C12H22O11	[M-H]-	Lactose	Others	Saccharides and Alcohols	63-42-3	A	1484100	2067400	2929500	3.04253e+06	2.21627e+06	2.14533e+06	1874800
mws0264	341	342.116	C12H22O11	[M-H]-	D-(+)-TrehaloseAnhydrous	Others	Saccharides and Alcohols	99-20-7	A	4976200	4237400	4810200	6.12253e+06	4.77533e+06	4.31443e+06	5.14763e+06
mws1080	341.1	342.116	C12H22O11	[M-H]-	Galactinol	Others	Saccharides and Alcohols	3687-64-7	A	21475000	25062000	24499000	2.68037e+07	2.48033e+07	21104000	24196000
mws5038	341.11	342.116	C12H22O11	[M-H]-	Isomaltulose	Others	Saccharides and Alcohols	13718-94-0	A	5328900	7348000	7842100	8.42367e+06	6308500	6.89493e+06	7.37063e+06
pme0519	341	342.116	C12H22O11	[M-H]-	D-(+)-Sucrose	Others	Saccharides and Alcohols	57-50-1	A	13488000	14702000	16307000	1.58787e+07	16116000	1.32607e+07	1.34877e+07
mws1333	341.12	342.116	C12H22O11	[M-H]-	Melibiose	Others	Saccharides and Alcohols	585-99-9	A	3162500	4596400	5387400	4214200	3.55973e+06	3.95633e+06	3534800
mws0906	341	342.132	C16H22O8	[M-H]-	Coniferin	Phenolic acids	Phenolic acids	531-29-3	B	4527000	6126800	6116500	1572270	2.98917e+06	1.31794e+07	4.92463e+06
pmb2211	343.1	342.288	C19H38N2O3	[M+H]+	Cocamidopropyl betaine	Alkaloids	Alkaloids	4292-10-8	A	11075	9057.1	10616	10878.6	8622.97	10114	9153.23
mws0609	344.2	345.047	C10H12N5O7P	[M-H]-	Guanosine 3',5'-cyclic monophosphate	Nucleotides and derivatives	Nucleotides and derivatives	7665-99-8	B	15298	15300	12850	28682.3	17726	22586.3	7994.17
pmb0801	346	345.106	C14H19NO9	[M+H]+	4-Pyridoxic acid O-hexoside	Others	Vitamin	-	B	24035	23909	28360	31921.7	15652.3	32507	39030.3
Hmcn0783	345.12	346.127	C15H22O9	[M-H]-	Aucubin	Others	Others	479-98-1	B	106930	133960	167890	9	21418.3	168373	321663
pme2977	347.3	346.25	C22H34O3	[M+H]+	Troxerutin (Trihydroxyethyl rutin)	Flavonoids	Flavonoid	-	A	110970	85780	108800	90177	103154	79603.3	78301.3
pmb0981	348.2	347.063	C10H14N5O7P	[M+H]+	Adenosine 5'-monophosphate	Nucleotides and derivatives	Nucleotides and derivatives	61-19-8	B	904080	976100	1092700	766820	1.09747e+06	1075000	1.27417e+06
Lmnp6339	353.27	352.261	C21H36O4	[M+H]+	Monoacylglycerol (acyl 18: 2) isomer 6	Lipids	Glycerol ester	-	A	8797500	6392000	7700700	3.12937e+06	5.59783e+06	4520300	2848650
pmb0160	353.3	352.262	C21H36O4	[M+H]+	MAG(18:3)isomer5	Lipids	Glycerol ester	-	A	3885000	3394900	3592100	4476300	3.72553e+06	4.86977e+06	3959910
pmb2444	353.2	352.262	C21H36O4	[M+H]+	MAG(18:3)isomer1	Lipids	Glycerol ester	-	A	7186600	5219500	5640100	2504300	4004000	4.04063e+06	2.48873e+06
pmb2325	353.1	352.262	C21H36O4	[M+H]+	MAG(18:3)isomer2	Lipids	Glycerol ester	-	A	68966	58387	54773	96202.3	196823	99591.3	129310
pmb1656	353.1	352.262	C21H36O4	[M+H]+	MAG(18:3)isomer4	Lipids	Glycerol ester	-	A	55919	36406	41648	42955.7	45449.7	56525.7	65480.3
pmb1605	353.3	352.262	C21H36O4	[M+H]+	MAG(18:3)isomer3	Lipids	Glycerol ester	-	A	8773800	6633900	7663400	3.07167e+06	5502800	4.45157e+06	2912800
mws2108	353.1	354.095	C16H18O9	[M-H]-	Cryptochlorogenic acid	Phenolic acids	Phenolic acids	905-99-7	A	18544000	21468000	24704000	7.77627e+06	1.43573e+07	1.54847e+07	32019000
mws0748	353.1	354.095	C16H18O9	[M-H]-	1-Caffeoylquinic acid	Phenolic acids	Phenolic acids	1241-87-8	A	29254000	39236000	41931000	14031000	1.64767e+07	3.57033e+07	6.55963e+07
pme1816	353	354.095	C16H18O9	[M-H]-	Neochlorogenic acid(5-O-Caffeoylquinic acid)	Phenolic acids	Phenolic acids	906-33-2	A	35855000	46705000	51358000	1.95167e+07	2.19367e+07	43719000	7.38487e+07
pme1399	355.15	354.147	C21H22O5	[M+H]+	Xanthohumol	Flavonoids	Chalcones	6754-58-1	B	16773	12954	17293	10801.1	9735.03	8900.47	5235.6
pmp1283	355.29	354.277	C21H38O4	[M+H]+	Glyceryl linoleate	Lipids	Glycerol ester	26545-74-4	A	991700	794120	889550	433557	583397	441203	322600
Lmnp6896	355.29	354.277	C21H38O4	[M+H]+	Monoacylglycerol (acyl 18: 2) isomer 3	Lipids	Glycerol ester	-	A	3193100	2646800	2836100	1.45767e+06	1.89993e+06	1406800	1051840
pmb0890	355.1	354.277	C21H38O4	[M+H]+	MAG(18:2)	Lipids	Glycerol ester	-	A	1018800	767130	743150	1209700	1.24133e+06	1069610	1.18789e+06
pmb0164	355.1	354.277	C21H38O4	[M+H]+	MAG(18:2)isomer1	Lipids	Glycerol ester	-	A	1117000	920760	984380	708910	728650	626380	311178
Zmhn2422	355.1	356.11	C16H20O9	[M-H]-	Feruloyl glucose	Phenolic acids	Phenolic acids	-	A	14340000	21040000	19454000	5.89637e+06	1.15887e+07	17815000	3.37303e+07
mws2625	359.15	358.142	C20H22O6	[M+H]+	Matairesinol	Lignans and Coumarins	Lignans	580-72-3	B	165670	115040	141440	57092.7	40324	157290	187350
mws0097	357.14	358.142	C20H22O6	[M-H]-	Pinoresinol	Lignans and Coumarins	Lignans	487-36-5	A	32339	27847	31121	16918.3	27496.3	28023.7	43169.7
pme0085	359.3	360.085	C18H16O8	[M-H]-	Rosmarinic acid	Phenolic acids	Phenolic acids	537-15-5	B	59892	60004	79832	110576	98992.3	81032	5143.47
pmb3107	359.1	360.106	C15H20O10	[M-H]-	Syringic acid O-glucoside	Phenolic acids	Phenolic acids	-	B	379780	431680	437030	802540	576050	164397	290833
pmp1048	361.13	360.142	C16H24O9	[M+H]+	Ixoroside	Terpenoids	Sesquiterpenoids	58514-30-0	B	40917	33773	40427	32225	27940.7	30710.3	36579
pmb0998	364.1	363.058	C10H14N5O8P	[M+H]+	Guanosine 5'-monophosphate	Nucleotides and derivatives	Nucleotides and derivatives	85-32-5	B	11930	11972	16862	11900.9	16883	13407.5	18342
pmb0752	369.1	368.111	C17H20O9	[M+H]+	3-O-Feruloyl quinic acid	Phenolic acids	Phenolic acids	1899-29-2	A	337100	400750	437280	341960	222333	352947	383727
mws0179	367	368.111	C17H20O9	[M-H]-	Chlorogenic acid methyl ester	Phenolic acids	Phenolic acids	29708-87-0	B	72439000	72338000	66575000	5.53727e+07	6.09593e+07	7.57887e+07	7.12593e+07
Lmtn3598	367.14	368.147	C18H24O8	[M-H]-	3-Prenyl-4-O-β-D-glucopyranosyloxy-4-hydroxyl-benzoic acid	Phenolic acids	Phenolic acids	-	B	16123	17466	18574	9	40248.3	8212.47	3468.33
pmn1695	371.1	372.106	C16H20O10	[M-H]-	Trihydroxycinnamoylquinic acid	Phenolic acids	Phenolic acids	-	A	2845500	3071200	3395400	3.96303e+06	1.84503e+06	4.44733e+06	2.85233e+06
pme1550	373.12	372.121	C20H20O7	[M+H]+	Tangeretin	Flavonoids	Flavonoid	-	B	13746	8257.6	11764	5176.5	6882.2	4836.2	14270.3
mws0011	371.1	372.142	C17H24O9	[M-H]-	Syringin	Phenolic acids	Phenolic acids	118-34-3	B	105520	179670	188000	58586.7	78289.3	179167	450137
Lmmn2139	379.98	379.984	C15H8O10S	[M-H]-	1，3，8，9-terahydroxycoumestan	Others	Others	-	B	66351	87282	86262	336637	25471	9	30778
pme3337	384	383.108	C14H17N5O8	[M+H]+	N6-Succinyl Adenosine	Nucleotides and derivatives	Nucleotides and derivatives	4542-23-8	B	86381	73242	93601	48417.7	36426	47811.3	107623
Zmhn2513	385.11	386.121	C17H22O10	[M-H]-	Isosinapic acid-hexoside	Phenolic acids	Phenolic acids	-	B	20929	29388	17255	40512.7	9	29495	17280.3
Zmhn2227	385.11	386.121	C17H22O10	[M-H]-	Sinapic acid-hexoside	Phenolic acids	Phenolic acids	-	B	14300	17198	22845	41117	16132.3	23323.3	17694.5
Zmhn1970	389.12	390.131	C20H22O8	[M-H]-	piceid	Others	Others	-	B	584000	728450	696150	22961.7	34234	630943	1.06517e+06
mws0043	403.13	402.132	C21H22O8	[M+H]+	Nobiletin	Flavonoids	Flavonoid	478-01-3	B	27357	19449	22917	7346.7	8173.67	7243.13	38620
pme3007	403	404.002	C9H14N2O12P2	[M-H]-	Uridine 5’-diphosphate	Nucleotides and derivatives	Nucleotides and derivatives	27821-45-0	B	38246	50422	46253	54503	47259.3	48290	52428.3
Lmhn1773	416.06	415.054	C19H13NO10	[M-H]-	caffeoylnicotinoyltartaric acid	Phenolic acids	Phenolic acids	-	B	165200	243170	277170	104127	102818	239930	476167
pma6199	417.2	416.111	C21H20O9	[M+H]+	Chrysin O-hexoside	Flavonoids	Flavonoid	-	B	23369	14205	16816	9	9	8680.77	30486.3
pmb0864	426.3	425.254	C19H40NO7P	[M+H]+	LysoPE 14:0	Lipids	LPE	-	B	11086	9181	7873.2	9681.57	1249.37	8742.67	18873.1
mad1424	427.06	426.043	C17H14O13	[M+H]+	Ditartaroyl-hydroxylcoumarin	Phenolic acids	Phenolic acids	-	B	154140	119980	145130	42679.3	58625	55688.7	95193.3
Lmhn3586	431.06	432.069	C20H16O11	[M-H]-	caffeoylp-Hydroxybenzoyltartaric acid	Phenolic acids	Phenolic acids	-	B	1086300	1392600	1406900	9	9	825610	3402000
mws1434	431.11	432.106	C21H20O10	[M-H]-	Isovitexin	Flavonoids	Flavonoid carbonoside	29702-25-8	B	239120	221060	167510	67217.3	156857	149002	245140
pmp0116	433.1	432.106	C21H20O10	[M+H]+	Apigenin-8-C-glucoside	Flavonoids	Flavonoid carbonoside	3681-93-4	B	176340	256230	257280	9	9	81540.7	404920
Lmzp4294	433.15	433.149	C22H25O9+	[M]+	heptamethoxyflavone	Flavonoids	Flavonoid	-	B	3674.3	4671	5459	912.333	9	9	4261.93
Lmdp3509	435.09	434.084	C20H18O11	[M+H]+	Quercetin 3-O-β-D-xylopyranoside	Flavonoids	Flavonols	549-32-6	B	15382	11713	15659	9	30092	9	9
pme0361	435.08	434.085	C20H18O11	[M+H]+	Quercetin 3-alpha-L-arabinofuranoside (Avicularin)	Flavonoids	Flavonoid	-	B	18265	22468	16150	5745.43	42115.3	9	9
mws2118	435.13	436.137	C21H24O10	[M-H]-	Phloretin 2'-O-glucoside	Flavonoids	Isoflavones	60-81-1	B	161030	180690	154310	44995.3	51025.7	221923	316430
mws1397	441.3	442.09	C22H18O10	[M-H]-	(-)-Epicatechin gallate	Flavonoids	Flavanols	1257-08-5	B	10181	16827	24277	4682.33	9	11625.5	12477.9
Hmpp3270	449.1	448.091	C21H20O11	[M+H]+	Luteolin-4'-O-β-D-glucoside	Flavonoids	Flavonoid	-	A	4212200	3805000	3603600	7427700	1.81963e+06	9	9
Zmhn3410	447.09	448.1	C21H20O11	[M-H]-	orientin	Flavonoids	Flavonoid	28608-75-5	A	655920	812000	1033200	4.08323e+06	628920	56283	9
Lmbp3393	449.11	448.1	C21H20O11	[M+H]+	Quercetin-3-O-α-L-rhamnopyranoside	Flavonoids	Flavonoid	-	A	3230400	3062900	2967100	6.15637e+06	1.47887e+06	9	9
Hmcp2316	449.11	448.1	C21H20O11	[M+H]+	isorhamnetin-O-Pentoside	Flavonoids	Flavonoid	-	A	37882	30683	31462	34568.3	25973.7	19764.7	28066
mws0913	447	448.101	C21H20O11	[M-H]-	Trifolin	Flavonoids	Flavonols	23627-87-4	A	666030	903980	857380	4693200	676870	60674.3	9
mws2209	447.1	448.101	C21H20O11	[M-H]-	Astragalin	Flavonoids	Flavonols	480-10-4	A	641410	896130	849560	3896500	609327	63624	20193.7
mws0089	447.09	448.101	C21H20O11	[M-H]-	Kaempferol 7-O-glucosdie	Flavonoids	Flavonols	16290-07-6	A	630150	919610	887680	3.94187e+06	700797	9	9
pmn1405	447.1	448.101	C21H20O11	[M-H]-	Luteolin-7-O-glucoside	Flavonoids	Flavonoid	5373-11-5	A	3313700	4475000	4862800	1.79023e+07	3.40503e+06	434853	9
Zmhn1905	447.09	448.101	C21H20O10	[M-H]-	hydroxyl aloe-emodin-O-glucoside	Others	Others	-	B	759050	924630	906070	4.14623e+06	679673	61920.7	16960.3
Lmlp3531	449.11	448.101	C21H20O11	[M+H]+	Luteolin 3'-O-β-D-glucoside	Flavonoids	Flavonoid	5154-41-6	A	3867500	3963700	3863100	6693900	1871500	9	9
pme2457	447.3	448.101	C21H20O11	[M-H]-	Luteolin 7-O-glucoside (Cynaroside)	Flavonoids	Flavonoid	-	B	272690	365710	343900	1761020	278810	16739	9
mws1361	449.1	450.116	C21H22O11	[M-H]-	Astilbin	Flavonoids	Dihydroflavonol	29838-67-3	B	220820	319140	323380	9	963630	39843.7	13730
pmb3023	449.1	450.116	C21H22O11	[M-H]-	Eriodictyol C-hexoside	Flavonoids	Dihydroflavone	-	B	618380	885390	804020	16456.6	41872.7	430897	1978400
Lmzn2203	449.11	450.117	C21H22O11	[M-H]-	eriodictyol-7-glucoside	Flavonoids	Flavonoid	-	A	523030	681500	603730	111708	153660	1559400	700533
Lmln1727	449.11	450.117	C21H22O11	[M-H]-	Hovetrichoside C isomer	Flavonoids	Flavonoid	-	B	1210600	1543800	1369600	25675.7	9	664907	3.08943e+06
Lmln1441	449.11	450.117	C21H22O11	[M-H]-	Hovetrichoside C	Flavonoids	Flavonoid	-	B	38815	50694	49797	9	9	22431.3	103957
Li512113	451.1	452.096	C20H20O12	[M-H]-	Maleoyl-caffeoylquinic acid	Phenolic acids	Phenolic acids	-	B	98509	172430	194110	77666.7	9	205877	287090
pmp1277	454.3	453.286	C21H44NO7P	[M+H]+	3-{(2-Aminoethoxy)(hydroxy)phosphoryl]oxy}-2-hydroxypropyl palmitate	Alkaloids	Alkaloids	-	A	1801900	1868500	1890700	1.96713e+06	1.22293e+06	843897	1.96557e+06
pmb0876	454.2	453.286	C21H44NO7P	[M+H]+	LysoPE 16:0	Lipids	LPE	53862-35-4	A	1821600	1852800	1916700	1.93063e+06	1226890	836910	1.90077e+06
pmd0160	452.3	453.286	C21H44NO7P	[M-H]-	LysoPE 16:0(2n isomer)	Lipids	LPE	-	A	2772100	3091000	2862900	4.13957e+06	2.34253e+06	1.76007e+06	4.14943e+06
Lmhn3811	457.08	458.085	C22H18O11	[M-H]-	p-coumaroylcaffeoyltartaric acid	Phenolic acids	Phenolic acids	-	B	78534	106020	98490	9	9	66794	251190
pmb2999	461.1	462.116	C22H22O11	[M-H]-	Chrysoeriol 5-O-hexoside	Flavonoids	Flavonoid	-	B	545920	822930	648520	1.9981e+06	3.20593e+06	9	9
Lmdp4307	463.16	462.152	C23H26O10	[M+H]+	Farrerol 7-O-glucoside	Flavonoids	Dihydroflavone	885044-12-2	B	160340	173200	192170	70900.3	134670	255103	9
Lmdp3286	465.1	464.095	C21H20O12	[M+H]+	isohyperoside	Flavonoids	Flavonols	35589-21-0	B	5380900	6011700	6219400	5.05347e+06	1.09993e+07	946210	695797
Zmhn3162	463.09	464.095	C21H20O12	[M-H]-	Quercetin-O-glucoside	Flavonoids	Flavonoid	-	B	5895800	7557400	7379600	8.10577e+06	1.73413e+07	1.41927e+06	788293
mws0091	463.09	464.096	C21H20O12	[M-H]-	Isoquercitrin	Flavonoids	Flavonols	482-35-9	B	5902100	7565400	8381900	7.82103e+06	1.63953e+07	1.51907e+06	706917
mws0061	463.1	464.096	C21H20O12	[M-H]-	Hyperin	Flavonoids	Flavonols	482-36-0	A	9477500	10172000	10669000	12688700	2.39493e+07	2424100	1155630
mws0856	463	464.096	C21H20O12	[M-H]-	Spiraeoside	Flavonoids	Flavonols	20229-56-5	B	6307000	6076900	6783000	7179400	17278000	1.56517e+06	833147
pmp1309	465.1	464.096	C21H20O12	[M+H]+	6-Hydroxykaempferol-7-O-glucoside	Flavonoids	Flavonols	-	A	4342600	4857100	4957700	4.05487e+06	9.97143e+06	850607	589910
mws1329	463.09	464.096	C21H20O12	[M-H]-	Gossypitrin	Flavonoids	Flavonols	491-50-9	A	4883400	6848900	7332500	6.48823e+06	15282000	1438900	816417
Hmcn1884	463.09	464.096	C21H20O12	[M-H]-	6-Hydroxyluteolin 5-glucoside	Others	Others	-	B	4321200	6703300	5973000	5.61177e+06	1.31573e+07	1.28447e+06	730447
pme3211	463	464.096	C21H20O12	[M-H]-	Quercetin 3-O-glucoside(Isotrifoliin)	Flavonoids	Flavonols	21637-25-2	A	6252500	7548900	7617500	7.26953e+06	1.66213e+07	1803500	912947
pme1598	463.13	464.132	C22H24O11	[M-H]-	Hesperetin 5-O-glucoside	Flavonoids	Dihydroflavonol	69651-80-5	B	4817100	7071800	6955000	6.62263e+06	1.45617e+07	1.47417e+06	768930
pmd0130	468.3	467.301	C22H46NO7P	[M+H]+	LysoPC 14:0(2n isomer)	Lipids	LPC	-	B	13227	12338	12097	25691.3	4513.17	21561.4	24354.7
Hmmp2121	469.12	468.113	C23H16O11	[M+H]+	Isorhamnetin-O-gallate	Flavonoids	Flavonols	-	B	58240	69007	66071	61185	49355.3	28482.7	60910
mad2400	471.1	472.101	C23H20O11	[M-H]-	p-Coumaroylferuloyltartaric acid	Phenolic acids	Phenolic acids	-	B	428610	390670	327140	9	9	258993	432370
Lmhn3422	473.07	474.08	C22H18O12	[M-H]-	Dicaffeoyltartaric acid (Chicoric acid)	Phenolic acids	Phenolic acids	70831-56-0	B	3483000	4195900	3850500	26576.7	83548.3	2539000	8996700
pmp1272	478.29	477.286	C23H44NO7P	[M+H]+	3-{(2-Aminoethoxy)(hydroxy)phosphoryl]oxy}-2-12-octadecadienoate	Alkaloids	Alkaloids	-	A	35061000	34504000	34190000	3.10703e+07	20402000	3.09113e+07	2.65283e+07
pmb0874	478.6	477.286	C23H44NO7P	[M+H]+	LysoPE 18:2(2n isomer)	Lipids	LPE	-	A	12361000	11835000	10857000	1.02114e+07	3.63167e+06	1.03736e+07	7.91057e+06
Hmpp3242	479.11	478.101	C22H22O12	[M+H]+	Isorhamnetin-3-O-β-D-glucoside	Flavonoids	Flavonoid	-	B	249160	314870	290410	24201.3	741557	127560	130887
pmf0374	477.1	478.111	C22H22O12	[M-H]-	2,6-Dimethyl-7-octene-2,3,6-triol	Others	Others	5041-82-7	B	152860	166850	169760	32563.7	432870	134623	219897
pmb0595	479.2	478.111	C22H22O12	[M+H]+	Isorhamnetin 5-O-hexoside	Flavonoids	Flavonoid	-	A	334600	356030	369400	37195.7	925957	119303	126930
pma6639	479.2	478.111	C22H22O12	[M+H]+	Isorhamnetin O-hexoside	Flavonoids	Flavonoid	-	A	455730	525090	479760	44205.3	1.15523e+06	157996	176643
mws0997	479	478.111	C22H22O12	[M+H]+	Petunidin 3-O-glucoside	Flavonoids	Anthocyanins	6988-81-4	B	61886	65011	56778	9	9	36259	114522
pma0214	479	478.111	C22H22O12	[M+H]+	methylQuercetin O-hexoside	Flavonoids	Flavonoid	-	A	325740	349180	357760	33975	912467	77039.3	132210
pma0249	479.12	478.111	C22H22O12	[M+H]+	Selgin 5-O-hexoside	Flavonoids	Flavonoid	-	B	157170	207140	149300	9	9	288923	192870
Hmcp2207	479.12	478.111	C22H22O12	[M+H]+	Isorhamnetin-7-O-β -D-glucopyranoside	Flavonoids	Flavonoid	-	B	497290	527990	472300	50364.3	1.26347e+06	170263	182907
mws4169	479.15	478.148	C23H26O11	[M+H]+	Calceorioside B	Phenolic acids	Phenolic acids	105471-98-5	A	87096	94539	103530	37619	97218	28854	96263
pmp1280	480.31	479.301	C23H46NO7P	[M+H]+	3-{[(2-Aminoethoxy)(hydroxy)phosphoryl]oxy}-2-hydroxypropyl-9,12-octadecenoate	Alkaloids	Alkaloids	-	A	752010	820450	857900	574823	206510	625723	639533
mws0289	478.1	479.301	C23H46NO7P	[M-H]-	LysoPE 18:1	Lipids	LPE	89576-29-4	B	1221400	1305800	1224900	1.09122e+06	351337	1232050	1.1138e+06
pmb0856	480.31	479.301	C23H46NO7P	[M+H]+	LysoPE 18:1(2n isomer)	Lipids	LPE	-	B	544400	605220	570600	930863	234450	821243	1937220
pmb2319	482.3	481.317	C23H48NO7P	[M+H]+	LysoPC 15:0	Lipids	LPC	-	B	50943	59523	53294	55387.7	40300.3	35754	35378.3
Hmyn7081	481.26	482.262	C22H43O9P	[M-H]-	LysoPG(16:1)	Lipids	Glycerol ester	-	B	4692.6	5359.3	5838.4	9098.33	4659.93	3517.63	4113.37
Hmyn7168	483.27	484.278	C22H45O9P	[M-H]-	LysoPG(16:0)	Lipids	Glycerol ester	-	A	3636800	6985800	4775100	6663500	6.25423e+06	2981100	8283610
Lmhn3935	487.09	488.095	C23H20O12	[M-H]-	feruloylcaffeoyltartaric acid	Phenolic acids	Phenolic acids	-	B	876750	988010	980490	10147.2	24912.7	1068770	2174000
Hmjn3948	487.35	488.35	C30H48O5	[M-H]-	madasiatic acid	Others	Others	-	B	20929	11632	17809	31229.3	13126.7	14955	6546.57
Hmjn5244	487.34	488.352	C30H48O5	[M-H]-	tormentic acid	Terpenoids	Triterpene	-	B	50983	50198	54880	65246.3	9	78958.3	71237.7
pmb0863	492.3	491.301	C24H46NO7P	[M+H]+	LysoPC 16:2(2n isomer)	Lipids	LPC	-	A	117070	129700	125060	148827	46477.7	464683	257150
pmb2984	491.1	492.126	C23H24O12	[M-H]-	Acetyl-eriodictyol O-hexoside	Flavonoids	Flavonoid	-	A	108450	123260	128180	9	9	268337	320457
Hmcp2268	493.13	492.126	C23H24O12	[M+H]+	Limocitrin 3-rhamnoside	Flavonoids	Flavonoid	-	B	114200	169460	119300	9	9	364497	9
pmb0736	493.1	492.127	C23H24O12	[M+H]+	Tricin 7-O-hexoside	Flavonoids	Flavonoid	-	B	117780	159450	145570	9	9	400057	9
pmp1270	494.33	493.282	C24H48NO7P	[M+H]+	LysoPC(16:2)	Lipids	LPC	-	B	840480	920520	904110	1.32497e+06	289070	2.27047e+06	2.06883e+06
pmb0855	496.3	495.333	C24H50NO7P	[M+H]+	LysoPC 16:0	Lipids	LPC	17364-16-8	A	8922300	10655000	10440000	1.39853e+07	8.82123e+06	7.71983e+06	10228400
pmd0132	496.33	495.333	C24H50NO7P	[M+H]+	LysoPC 16:0(2n isomer)	Lipids	LPC	-	A	3470600	3882200	3674000	5.52087e+06	2.33937e+06	3.61253e+06	4999700
pmp1278	496.34	495.333	C24H50NO7P	[M+H]+	LysoPC(16:0)	Lipids	LPC	-	A	10367000	11618000	10890000	1.52717e+07	9.89773e+06	8.35483e+06	11549500
pmb3051	495.1	496.137	C26H24O10	[M-H]-	Tricin 4'-O-syringyl alcohol	Flavonoids	Flavonoid	-	B	10022	11986	14376	13657.6	2298.67	14826.3	10187.4
pma0825	503	502.111	C24H22O12	[M+H]+	Chrysin O-malonylhexoside	Flavonoids	Flavonoid	-	A	17081	16104	17169	9	9	21792.7	45038
Lmhn3668	501.1	502.111	C24H22O12	[M-H]-	p-coumaroylsinapoyltartaric acid	Phenolic acids	Phenolic acids	-	B	10966	14152	11397	9	9	16350	11240
mad2394	501.11	502.111	C24H22O12	[M-H]-	Sinapoyl-p-coumaroyltartaric acid	Phenolic acids	Phenolic acids	-	B	34214	38472	37824	18691	19223.3	52802	61572.7
pmb3000	503.1	504.127	C24H24O12	[M-H]-	Chrysoeriol O-acetylhexoside	Flavonoids	Flavonoid	-	B	367100	430660	504460	9	9	660677	976333
pme0500	503.44	504.169	C18H32O16	[M-H]-	D-(+)-Melezitose	Others	Saccharides and Alcohols	597-12-6	A	180410	143110	146910	294067	195570	122506	78057.7
mws1589	503.2	504.169	C18H32O16	[M-H]-	Panose	Others	Saccharides and Alcohols	33401-87-5	A	106240	101970	123750	229153	172163	52712.7	58611
pmb3026	505.1	506.106	C23H22O13	[M-H]-	Quercetin O-acetylhexoside	Flavonoids	Flavonoid	-	B	23790	24530	33018	26273.3	116033	6030.07	9
Hmcn0773	507.17	508.18	C21H32O14	[M-H]-	6'-O-glucosylaucubin	Others	Others	-	B	125690	137610	143500	227400	190800	105093	41429.7
Hmjp7544	515.31	514.303	C27H46O9	[M+H]+	Glyceryl linoleate-O-Hexoside	Lipids	Glycerol ester	-	B	316590	388210	448050	152673	297320	209977	169373
Hmqp6235	516.3	515.297	C21H46N3O9P	[M+H]+	LysoPC 18:4	Lipids	LPC	-	A	1346400	1631000	1559200	272313	186970	3.06987e+06	1.16311e+06
pmn1382	515.12	516.127	C25H24O12	[M-H]-	Isochlorogenic acid A	Phenolic acids	Phenolic acids	2450-53-5	A	13986000	16611000	13275000	5.35367e+06	1.08757e+07	11353700	2.13973e+07
Hmln2535	515.12	516.127	C25H24O12	[M-H]-	4,5-DiCQA	Flavonoids	Flavonoid	-	B	43244000	57095000	27529000	2.22257e+07	4.41797e+07	45064000	27656000
Li512115	515.12	516.127	C25H24O12	[M-H]-	3,4-Dicaffeoylquinic acid	Phenolic acids	Phenolic acids	14534-61-3	A	12808000	20355000	19137000	6.71183e+06	12518000	11512000	2.66333e+07
pmp1279	518.32	517.313	C21H48N3O9P	[M+H]+	Bis(N,N-diethylethanaminium)-2-acetamido-1,5-anhydro-2-deoxy-1-[-hydroxy(phosphonato)methyl]-D-glucitol	Alkaloids	Alkaloids	-	B	507680	531350	478830	627923	337273	287280	420347
pmb0865	518.2	517.317	C26H48NO7P	[M+H]+	LysoPC 18:3(2n isomer)	Lipids	LPC	-	A	30852000	31397000	31032000	3.44687e+07	21489000	2.99643e+07	19873003
pmn1424	517.23	518.236	C24H38O12	[M-H]-	(6S,7E,9R)-6,9-Dihydroxy-4,7-megastigmadin-3-one-9-O-D-xylopyranosyl(1-6)-glucopyranoside	Others	Others	-	A	285280	278040	285790	529057	127397	778287	68472
pma0791	521	520.121	C24H24O13	[M+H]+	Naringenin O-malonylhexoside	Flavonoids	Flavonoid	-	A	37431	33038	41923	3787.4	117852	18318.3	50649.3
pmb3013	519.1	520.122	C24H24O13	[M-H]-	Isorhamnetin O-acetyl-hexoside	Flavonoids	Flavonols	-	B	20812	19371	18955	3419.87	41632	27326.3	4256.63
pmn1739	519.2	520.158	C25H28O12	[M-H]-	6'-trans-Cinnamoyl-8-epikingisidic acid	Phenolic acids	Phenolic acids	-	B	44721	49721	51533	12460.3	30782.7	27448.7	95768.7
pmp0682	538.22	520.195	C26H32O11	[M+NH4]+	Matairesinoside	Lignans and Coumarins	Lignans	23202-85-9	A	599530	748060	716670	349617	208547	953813	1.53314e+06
pmn1378	519.16	520.195	C26H32O11	[M-H]-	Terpineol monoglucoside	Lignans and Coumarins	Lignans	-	A	15280000	16629000	15364000	11736000	7.39677e+06	1.82148e+07	1.92337e+07
Rfmb25714	519.19	520.195	C26H32O11	[M-H]-	Pinoresinol-Hexose	Lignans and Coumarins	Lignans	-	B	143050	170510	192340	151500	89507	311487	136747
pmp1281	522.36	521.348	C26H52NO7P	[M+H]+	LysoPC(18:1)	Lipids	LPC	-	A	3166800	3691600	3659100	1883400	754947	3.75073e+06	3016400
pmb3041	521.1	522.101	C23H22O14	[M-H]-	Tricin O-saccharic acid	Flavonoids	Flavonoid	-	B	1658200	1846500	2142900	3.39393e+06	678723	1641700	2.23257e+06
pmd0136	524.36	523.364	C26H54NO7P	[M+H]+	LysoPC 18:0	Lipids	LPC	-	A	72091	92214	80281	90080	60103.3	36612	71266.3
pmp1286	524.37	523.364	C26H54NO7P	[M+H]+	LysoPC(18:0)	Lipids	LPC	-	A	214420	253920	231050	435473	232057	97764.7	258577
mws0126	524.37	523.364	C26H54NO7P	[M+H]+	1-Stearoyl-sn-glycero-3-phosphocholine	Lipids	LPC	19420-57-6	A	192670	238040	212140	428693	221323	98546.3	267037
pmb3053	523.1	524.132	C27H24O11	[M-H]-	Tricin O-eudesmic acid	Flavonoids	Flavonoid	-	B	6758.7	4768.2	4207.9	4992.83	9	3611.03	9
pmp0235	527.15	526.148	C27H26O11	[M+H]+	Salcolin B	Flavonoids	Flavonoid	-	A	13151	12486	12306	17822.2	5988.53	13939.7	8689.07
pmp0234	527.15	526.148	C27H26O11	[M+H]+	Salcolin A	Flavonoids	Flavonoid	-	A	9743.2	15151	11896	17481.7	5897.37	15561	9158.27
Lmhn3801	531.12	532.122	C25H24O13	[M-H]-	feruloylsinapoyltartaric acid	Phenolic acids	Phenolic acids	-	B	117520	137050	145620	82420.7	50239.3	325530	76125
Hmln2402	533.1	534.101	C24H22O14	[M-H]-	Kaempferol 3-O-(6′′-O-malonyl)-galactoside	Flavonoids	Flavonoid	-	B	26124	30153	31947	68008.3	31678	9	9
pmn1645	533.1	534.101	C24H22O14	[M-H]-	Isorhamnetin 3-O-β-(2''-O-acetyl-β-D-glucuronide)	Flavonoids	Flavonols	-	B	31572	32319	40616	108496	34299	9	9
pmp1274	542.32	541.317	C28H48NO7P	[M+H]+	2-Hydroxy-5,8,11,14,17-icosapentaenoyloxy ]propyl-2-(trimethylammonio)ethyl phosphate	Alkaloids	Alkaloids	-	A	686410	857540	643750	730000	386780	717127	551573
Hmln2189	549.09	550.096	C24H22O15	[M-H]-	Quercetinn 3-O-(6′′-O-malonyl)-galactoside	Flavonoids	Flavonoid	-	B	52000	71061	60650	50400.7	152963	9	9
Hmln2355	549.2	550.204	C27H34O12	[M-H]-	4-demethyltraxillaside	Flavonoids	Flavonoid	-	B	75439	86106	92956	68177	138827	97056	144923
Hmyn7087	555.28	556.299	C25H49O11P	[M-H]-	LysoPI(P-16:0)	Lipids	Glycerol ester	-	B	33707	20284	35303	12318.1	25771	68871.3	17691.3
pmb3032	561.1	562.132	C26H26O14	[M-H]-	Tricin O-malonyl rhamnoside	Flavonoids	Flavonoid	-	B	49722	62237	48971	6892.3	19788.3	179165	8326.67
pmb3114	561.1	562.148	C30H26O11	[M-H]-	Epicatechin-epiafzelechin	Tannins	Proanthocyanidins	-	B	14369	12470	12301	9	9	13884	3563.03
pmb2922	565.1	566.055	C15H24N2O17P2	[M-H]-	Uridine 5'-diphospho-D-glucose	Nucleotides and derivatives	Nucleotides and derivatives	133-89-1	A	4799800	4979400	6808600	6.29113e+06	4698200	6.70507e+06	6.62983e+06
Lmqn1932	579.21	580.216	C28H36O13	[M-H]-	syringaresinol- 4′-O-β -D-monoglucoside	Others	Others	137038-13-2	B	4395100	5420700	5654800	3.29277e+06	6.80593e+06	3299800	5743500
pme1665	593.16	594.159	C27H30O15	[M-H]-	Isovitexin 7-O-glucoside(Saponarin)	Flavonoids	Flavonoid carbonoside	20310-89-8	B	15480	15008	17881	9	9	9196.57	38026
Hmgp1944	625.21	624.205	C29H36O15	[M+H]+	Isoacteoside	Others	Others	61303-13-7	B	34703	67898	66837	51575.3	9	9	129740
pmn1736	623.2	624.206	C29H36O15	[M-H]-	Verbascoside	Phenolic acids	Phenolic acids	61276-17-3	B	92040	75127	137240	9	9	90929.3	237180
Rfmf01741	625	626.148	C27H30O17	[M-H]-	Quercetin-3-O-hexose-hexoside	Flavonoids	Flavonoid	-	A	1566300	1937400	1858600	8549.13	9	2945500	2.67773e+06
Lmzn1572	637.11	638.112	C27H26O18	[M-H]-	scutellarin －7 － O － diglucuronide	Flavonoids	Flavonoid	-	B	102030	123620	117970	9	9	236246	177683
Hmyn5706	653.38	654.38	C31H58O14	[M-H]-	DMGM(16:0)	Lipids	Glycerol ester	-	B	59442	71471	69891	59666	39281.7	82822.3	57378
pmn1588	665.2	666.222	C24H42O21	[M-H]-	Nystose	Others	Saccharides and Alcohols	13133-07-8	B	507260	651030	692680	450387	607250	696557	985183
pmn1370	681.24	682.247	C32H42O16	[M-H]-	Pinoresinol diglucoside	Lignans and Coumarins	Lignans	63902-38-5	A	51904	44629	57650	41410.7	26942.7	78309	53412.3
pmb3039	703.1	704.138	C35H28O16	[M-H]-	Tricin O-oxalic acid O-coumaroyl shikimic acid	Flavonoids	Flavonoid	-	B	4850.5	8322.3	6573.2	9	9	8454.97	13927.3
pme2746	784.2	785.157	C27H33N9O15P2	[M-H]-	Flavin adenine dinucleotide(FAD)	Nucleotides and derivatives	Nucleotides and derivatives	146-14-5	A	122770	163550	175540	179830	130390	194547	190843
pmb0662	787.2	786.201	C37H38O19	[M+H]+	C-Hexosyl-luteolin O-feruloylhexoside	Flavonoids	Flavonoid carbonoside	-	B	81671	64079	96671	9	9	45957	191070
pmf0617	787.2	787.229	C34H43O21	[M]+	Peonidin 3-sophoroside-5-glucoside.	Flavonoids	Anthocyanins	-	A	675520	517960	669100	9	9	436713	929770
pmb0666	801.1	800.216	C38H40O19	[M+H]+	6-C-Hexosyl-apigenin O-sinapoylhexoside	Flavonoids	Flavonoid carbonoside	-	B	81895	43942	83555	9	9	93951.3	59653.7
pmf0618	893.2	893.235	C40H45O23	[M]+	Cyanidin 3-p-hydroxybenzoylsophoroside-5-glucoside	Flavonoids	Anthocyanins	-	A	309240	368870	383000	9	9	414023	552780
LShqs0161	907	907.25	C41H47O23	[M]+	Peonidin-3-(6′-p-hydroxybenzoyl)-sophoroside-5-glucoside	Flavonoids	Anthocyanins	-	A	147020	181210	127190	9	9	65013.3	228387
Rfmf00521	935	935.245	C42H47O24	[M]+	Cyanidin 3-(6′′-caffeoylsophoroside)-5-glucoside	Flavonoids	Anthocyanins	-	A	35941	55357	73657	9	9	76404.3	105926
Hmmp2008	949.25	948.247	C40H52O26	[M+H]+	Isorhamnetin-O-Hexoside-O-rhamnoside-O-Hexoside-O-Hexoside	Flavonoids	Flavonols	-	B	164540	174810	145670	9	9	58709.3	431617
CWJp2348	949.26	948.254	C43H48O24	[M+H]+	Kaempferol-3-O-rhamnosyl-sophoroside-7-Oglucoside	Flavonoids	Flavonoid	-	B	145310	166500	155380	9	9	63826.3	415470
wxhqs0304	949	949.261	C43H49O24	[M]+	Cyanidin 3-feruloylsophorside-5-glucoside	Flavonoids	Anthocyanins	-	A	63396	67730	73130	9	9	118942	66685.3
LShqs0072	949	949.261	C43H49O24	[M]+	Cyanidin-3-(sinapoyl)diglucoside-5-xyloside	Flavonoids	Anthocyanins	-	A	69293	88771	84406	9	9	110502	65117
pmf0619	963.3	963.277	C44H51O24	[M]+	Peonidin 3-feruloylsophoroside-5-glucoside.	Flavonoids	Anthocyanins	-	B	104960	115500	76603	9	9	61513.7	213377
Note: The value '9.00' represents that the matched metabolites were undetectable in the sweet potato experimental materials

## Sheet: Table S3
Table S3. Summary of the RNA-seq results for validation of the raw data validity
Sample	Raw Reads	Clean Reads	Clean Base(G)	Error Rate(%)	Q20(%)	Q30(%)	GC Content(%)	Reads mapped	Unique mapped	Multi mapped
1143-1_1	63136866	62083612	9.31	0.03	97.51	93.09	45.43	53140588(85.60%)	50406293(81.19%)	3676284(4.40%)
1143-1_2	62683084	61344974	9.2	0.03	97.54	93.14	45.52	52645780(85.82%)	49976593(81.47%)	3592318(4.35%)
1143-1_3	56447320	55250006	8.29	0.03	97.63	93.41	45.48	47520453(86.01%)	45064813(81.57%)	3315981(4.44%)
HS_1	62240220	60952110	9.14	0.03	97.22	92.49	45.8	51512242(84.51%)	48848563(80.14%)	3604452(4.37%)
HS_2	57669644	56094710	8.41	0.03	97.79	93.62	45.78	47549097(84.77%)	45071514(80.35%)	3357807(4.42%)
HS_3	60403778	59365922	8.9	0.03	97.65	93.34	45.74	50280699(84.70%)	47682218(80.32%)	3536972(4.38%)
DZGS88_1	68081880	66532368	9.98	0.03	97.42	92.91	46.06	56978561(85.64%)	53522147(80.45%)	4948969(5.20%)
DZGS88_2	58766184	57429652	8.61	0.03	97.62	93.37	46.28	49533423(86.25%)	46459954(80.90%)	4436739(5.35%)
DZGS88_3	58232890	56786268	8.52	0.03	97.48	93.13	46.19	48598046(85.58%)	45539042(80.19%)	4408297(5.39%)
DZGS54_1	64208400	62793326	9.42	0.03	97.55	93.24	46.18	53710396(85.54%)	50162418(79.88%)	5230170(5.65%)
DZGS54_2	56472224	55302648	8.3	0.03	97.74	93.6	46.46	47492806(85.88%)	44064257(79.68%)	5005911(6.20%)
DZGS54_3	63713222	62242350	9.34	0.03	97.71	93.54	46.19	53404400(85.80%)	49771327(79.96%)	5324096(5.84%)

## Sheet: Table S4
Table S4. Detailed message of 1214 differentially expressed genes (782 upregulated and 432 downregulated) identified from the comparative transcriptomics
						1143-1_readcount			HS_readcount			DZ88_readcount			DZ54_readcount			1143-1_fpkm	HS_fpkm	DZ88_fpkm	DZ54_fpkm	DZ88 vs 1143-1					DZ54 vs 1143-1					DZ88 vs HS					DZ54 vs HS
Gene ID	chr	start	end	strand	gene_description	1143-1_1_readcount	1143-1_2_readcount	1143-1_3_readcount	HS_1_readcount	HS_2_readcount	HS_3_readcount	DZ88_1_readcount	DZ88_2_readcount	DZ88_3_readcount	DZ54_1_readcount	DZ54_2_readcount	DZ54_3_readcount	mean value of the three biological replicates	mean value of the three biological replicates	mean value of the three biological replicates	mean value of the three biological replicates	FoldChange	log2 Fold Change	pvalue	padj	regulated	FoldChange	log2FoldChange	pvalue	padj	regulated	FoldChange	log2FoldChange	pvalue	padj	regulated	FoldChange	log2FoldChange	pvalue	padj	regulated
g10210	LG3	5511551	5514578	-	Eukaryotic-type carbonic anhydrase	9	4	8	6	0	2	88	382	145	158	104	294	0.156667	0.0566667	4.65667	4.09333	33.05	5.047	9.68175e-15	2.4072e-13	up	28.236	4.819	2.55414e-22	9.00851e-21	up	79.292	6.309	1.30595e-14	2.59719e-13	up	67.334	6.073	1.90487e-20	3.01392e-19	up
g10267	LG3	5953851	5956339	-	PA domain	39	78	32	54	60	52	1971	8427	3627	247	250	193	0.456667	0.52	44.26	2.16333	107.297	6.745	1.03369e-19	4.45614e-18	up	5.112	2.354	3.13491e-12	4.26073e-11	up	85.984	6.426	3.53497e-24	1.68655e-22	up	4.107	2.038	2.04354e-14	2.0575e-13	up
g10307	LG3	6214786	6217474	+	Ribosomal L18 of archaea, bacteria, mitoch. and chloroplast	23	33	46	68	51	51	170	173	161	363	320	365	0.68	1.13667	3.31333	6.96667	5.351	2.42	2.63099e-11	4.17836e-10	up	11.085	3.471	1.35177e-37	1.20896e-35	up	2.936	1.554	3.11999e-08	2.81281e-07	up	6.058	2.599	1.51122e-33	4.89402e-32	up
g10596	LG3	8610332	8613543	-	--	24	11	11	0	2	0	37	45	27	53	34	62	0.246667	0.0133333	0.596667	0.816667	2.618	1.388	0.017805	0.0453346	up	3.513	1.813	0.000277009	0.00107924	up	53.392	5.739	3.68131e-06	2.36112e-05	up	71.894	6.168	9.75242e-08	5.0695e-07	up
g10615	LG3	8741375	8750664	+	Reovirus minor core protein Mu-2	79	27	38	29	37	42	505	485	450	268	166	236	0.413333	0.32	4.16	1.94333	11.026	3.463	5.87757e-24	3.79245e-22	up	5.057	2.338	4.34656e-11	5.11014e-10	up	13.137	3.716	7.93993e-53	1.67646e-50	up	6.025	2.591	9.784e-20	1.48146e-18	up
g10719	LG3	9493832	9495537	+	Cytochrome P450	264	171	70	146	120	80	1517	1011	777	1070	871	492	2.13333	1.52333	14.0367	10.7	7.168	2.842	2.07256e-14	4.94411e-13	up	5.398	2.432	2.69609e-05	0.000129401	up	9.262	3.211	7.18277e-34	6.05351e-32	up	6.963	2.8	3.56929e-23	6.68007e-22	up
g10743	LG3	9673887	9674542	+	--	22	22	32	19	17	26	76	129	49	46	48	68	0.973333	0.8	3.22667	2.07333	3.647	1.867	0.000271025	0.0012031	up	2.298	1.2	0.00454937	0.0130517	up	4.076	2.027	9.79119e-05	0.000465463	up	2.563	1.358	0.00259863	0.00673395	up
g10891	LG3	10894233	10897166	+	SMP-30/Gluconolactonase/LRE-like region	29	32	19	39	16	43	100	69	118	92	78	118	0.416667	0.516667	1.50667	1.52	3.948	1.981	1.46592e-06	1.0844e-05	up	3.917	1.97	1.83301e-08	1.53166e-07	up	2.916	1.544	0.00098546	0.00369419	up	2.889	1.531	0.000159212	0.000519763	up
g10894	LG3	10908773	10911688	+	Zinc-binding RING-finger	13	12	23	49	24	19	96	53	110	78	70	85	0.25	0.473333	1.32	1.2	5.812	2.539	7.08446e-07	5.55931e-06	up	5.226	2.386	1.63583e-08	1.37753e-07	up	2.79	1.48	0.0035238	0.0113023	up	2.498	1.32	0.00193526	0.00516403	up
g1100	LG1	6532704	6534161	-	Methyltransferase domain	1705	1293	937	942	2590	1561	8439	9531	8568	4266	4391	3820	29.7	40.1967	203.09	96.8033	7.487	2.904	3.18672e-46	8.01791e-44	up	3.508	1.811	6.22251e-24	2.50319e-22	up	5.099	2.35	2.62854e-07	2.05839e-06	up	2.392	1.258	0.00590241	0.0141213	up
g1102	LG1	6548997	6553121	-	--	68	54	82	35	84	91	278	161	132	172	159	154	0.926667	0.973333	2.51333	2.21333	2.971	1.571	5.33934e-06	3.50797e-05	up	2.579	1.367	6.11721e-07	4.01209e-06	up	2.604	1.381	0.00116203	0.00427734	up	2.259	1.176	0.000875617	0.00250036	up
g11219	LG3	13229077	13232131	+	OB-fold nucleic acid binding domain	13	7	16	13	42	24	575	493	476	876	664	907	0.126667	0.293333	5.49	8.79333	46.598	5.542	2.55158e-67	1.45823e-64	up	73.451	6.199	2.4564e-102	2.0086e-99	up	19.027	4.25	5.56091e-34	4.70662e-32	up	30.032	4.908	1.66265e-75	2.51473e-73	up
g11473	LG3	15072294	15072850	+	--	0	8	4	0	0	0	100	90	57	43	46	50	0.18	0	3.67	2.11667	22.175	4.471	1.85026e-10	2.59901e-09	up	12.59	3.654	2.61582e-07	1.82816e-06	up	437.568	8.773	6.76079e-12	9.9877e-11	up	248.034	7.954	9.82444e-10	6.3794e-09	up
g11765	LG3	17410171	17410795	-	AP2 domain	0	0	0	2	0	0	8	25	6	27	11	10	0	0.0233333	0.47	0.563333	78.936	6.303	0.000280513	0.00124164	up	93.483	6.547	1.483e-05	7.54285e-05	up	19.928	4.317	0.00767452	0.0222051	up	23.505	4.555	0.00131832	0.00363169	up
g11824	LG3	17878045	17881434	-	--	762	600	534	162	131	132	1517	860	1399	1538	1288	1694	11.8233	2.71333	23.5233	28.5867	2.17	1.117	4.06618e-07	3.33403e-06	up	2.596	1.376	1.04249e-24	4.50102e-23	up	8.712	3.123	1.34721e-44	1.90311e-42	up	10.413	3.38	6.1458e-140	2.9527e-137	up
g12079	LG3	19580758	19581412	-	--	37	50	46	102	102	97	548	587	598	209	192	276	1.5	3.46	19.5933	7.69	14.29	3.837	4.03645e-54	1.45476e-51	up	5.506	2.461	1.2041e-20	3.72832e-19	up	5.708	2.513	3.1036e-35	2.77472e-33	up	2.198	1.137	4.91178e-07	2.33452e-06	up
g12096	LG3	19699922	19714357	-	Helix-loop-helix DNA-binding domain	0	0	0	1	2	0	61	1	64	112	124	105	0	0.02	0.84	2.34333	244.2	7.932	3.72678e-06	2.53554e-05	up	677.627	9.404	1.88468e-14	3.29034e-13	up	40.258	5.331	0.00020589	0.00091082	up	112.37	6.812	6.52749e-14	6.30322e-13	up
g12112	LG3	19815774	19816916	+	--	85	92	62	42	52	57	274	400	162	85	213	229	2.75667	1.79333	9.7	6.27667	3.855	1.947	1.25307e-07	1.12726e-06	up	2.448	1.292	0.000798264	0.00278971	up	5.465	2.45	1.39297e-10	1.74045e-09	up	3.47	1.795	5.62242e-06	2.31291e-05	up
g12215	LG3	20612220	20612660	-	--	12	0	8	9	14	20	146	210	71	114	51	53	0.336667	0.733333	7.11333	3.64667	23.354	4.546	2.54401e-10	3.49136e-09	up	11.719	3.551	3.0101e-07	2.08048e-06	up	9.777	3.289	6.27203e-10	7.18731e-09	up	4.91	2.296	8.5651e-06	3.43319e-05	up
g12253	LG3	20863488	20864171	-	zinc-ribbon domain	0	0	0	0	0	0	11	20	10	5	8	11	0	0	0.443333	0.266667	82.185	6.361	9.1508e-05	0.000457883	up	47.478	5.569	0.00120331	0.00402199	up	74.163	6.213	0.000193959	0.000863816	up	42.841	5.421	0.002612	0.00676473	up
g12301	LG3	21199030	21200386	+	--	30	25	14	20	14	13	151	272	126	40	62	71	0.526667	0.373333	4.29333	1.37	8.889	3.152	2.45818e-12	4.53386e-11	up	2.774	1.472	0.00126602	0.00421273	up	11.681	3.546	1.02781e-14	2.06367e-13	up	3.647	1.867	0.000132326	0.000438372	up
g12427	LG3	22291557	22292162	+	--	0	0	0	0	0	0	10	8	6	6	8	12	0	0	0.286667	0.32	46.997	5.554	0.00248153	0.00838957	up	51.24	5.679	0.000727923	0.00257397	up	42.448	5.408	0.00438337	0.0136716	up	46.233	5.531	0.00166262	0.004492	up
g12432	LG3	22325274	22327647	+	Protein of unknown function (DUF812)	26	50	34	13	11	42	70	102	60	159	210	245	0.853333	0.52	1.81333	4.86	2.317	1.213	0.00703765	0.0207015	up	6.098	2.608	1.31363e-15	2.53898e-14	up	3.507	1.81	0.00270907	0.00900715	up	9.212	3.204	1.45206e-13	1.36473e-12	up
g12433	LG3	22329496	22343179	-	ABC transporter	0	0	0	0	0	0	180	445	182	624	575	678	0	0	1.13333	2.62333	1631.01	10.672	5.0198e-17	1.60525e-15	up	3698.45	11.853	2.09764e-23	8.08137e-22	up	1471.01	10.523	1.34881e-16	3.29889e-15	up	3337.09	11.704	7.45742e-23	1.37056e-21	up
g1255	LG1	7474077	7474520	+	Protein kinase domain	0	0	0	0	0	0	58	81	27	16	13	9	0	0	2.74333	0.643333	328.398	8.359	7.28392e-10	9.36956e-09	up	75.265	6.234	5.07151e-05	0.000231146	up	296.446	8.212	1.97282e-09	2.11938e-08	up	67.925	6.086	0.000138344	0.00045642	up
g12966	LG4	1307700	1308788	-	Sulfotransferase family	5	13	0	5	4	0	24	30	27	13	39	38	0.12	0.0633333	0.55	0.626667	5.071	2.342	0.0159772	0.0413968	up	5.664	2.502	0.00643547	0.0176951	up	8.948	3.162	0.000716173	0.00277081	up	9.999	3.322	0.000285042	0.000891468	up
g1307	LG1	7834545	7842395	-	Zinc knuckle	505	333	251	229	335	233	729	1124	520	938	772	801	1.21333	0.923333	2.68	2.86	2.425	1.278	0.000101828	0.000503975	up	2.535	1.342	1.36408e-10	1.5144e-09	up	2.938	1.555	7.27053e-07	5.30327e-06	up	3.076	1.621	1.19759e-18	1.67947e-17	up
g13084	LG4	2175132	2177100	-	Rx N-terminal domain	0	0	0	0	0	0	17	22	6	24	10	1	0	0	0.28	0.223333	88.601	6.469	8.11612e-05	0.000411098	up	68.739	6.103	0.000707412	0.00251009	up	79.993	6.322	0.000168271	0.000759726	up	62.033	5.955	0.00114105	0.00318315	up
g13091	LG4	2202833	2203690	-	Jacalin-like lectin domain	83	117	36	0	0	0	117	409	180	238	129	359	2.38	0	7.43333	7.43667	3.421	1.774	0.00104073	0.00393967	up	3.325	1.733	1.75537e-05	8.78169e-05	up	1298.84	10.343	1.68414e-15	3.65911e-14	up	1264.46	10.304	5.55786e-17	6.89239e-16	up
g13093	LG4	2217073	2217930	-	Jacalin-like lectin domain	18	23	9	0	6	0	47	110	67	60	13	55	0.596667	0.0766667	2.76	1.52667	5.059	2.339	3.4267e-05	0.000188823	up	2.728	1.448	0.0209378	0.049114	up	36.898	5.205	6.75481e-08	5.80122e-07	up	19.845	4.311	2.32724e-05	8.71982e-05	up
g13106	LG4	2274110	2274969	-	Jacalin-like lectin domain	105	52	35	4	8	0	188	245	246	137	102	288	2.07333	0.136667	7.53	5.76667	3.978	1.992	7.86501e-07	6.12244e-06	up	2.98	1.575	0.000302521	0.0011683	up	56.191	5.812	2.76643e-24	1.32785e-22	up	42.067	5.395	6.65352e-19	9.52699e-18	up
g13242	LG4	3204358	3209447	-	haloacid dehalogenase-like hydrolase	159	146	126	49	62	46	668	1220	682	1989	1767	1985	1.00333	0.38	6.08667	13.6167	6.634	2.73	7.16857e-20	3.13419e-18	up	14.521	3.86	2.2791e-208	8.3014e-205	up	16.324	4.029	6.50688e-36	6.06316e-34	up	35.852	5.164	5.7873e-232	9.8473e-229	up
g13249	LG4	3251891	3254507	-	Reverse transcriptase-like	0	0	0	0	0	0	26	59	21	12	14	2	0	0	1.01333	0.276667	213.27	7.737	6.4283e-08	6.06233e-07	up	56.789	5.828	0.000956801	0.0032808	up	192.396	7.588	1.61573e-07	1.31185e-06	up	51.265	5.68	0.00176332	0.00473896	up
g13250	LG4	3255652	3259914	+	zinc-binding in reverse transcriptase	0	0	0	0	0	0	602	921	645	384	321	377	0	0	5.21	2.60667	4344.32	12.085	2.12115e-23	1.31765e-21	up	2128.86	11.056	2.05616e-20	6.24595e-19	up	3920.13	11.937	6.20801e-23	2.62727e-21	up	1920.85	10.908	7.28296e-20	1.11187e-18	up
g13319	LG4	3665874	3669522	-	Hydroxyethylthiazole kinase family	74	70	88	74	73	92	455	255	305	207	146	233	1.21	1.26333	5.19	3.05333	4.683	2.228	1.63343e-16	4.94667e-15	up	2.713	1.44	1.36257e-08	1.16158e-07	up	4.128	2.045	3.80264e-15	7.96968e-14	up	2.386	1.255	5.8421e-07	2.74935e-06	up
g13438	LG4	4423826	4425830	-	Prolyl oligopeptidase family	149	148	177	103	63	119	758	875	504	671	599	640	2.61333	1.58667	11.6733	10.6033	4.897	2.292	6.41636e-19	2.56174e-17	up	4.37	2.128	2.55151e-36	2.16592e-34	up	7.427	2.893	4.57856e-24	2.15084e-22	up	6.61	2.725	8.80732e-41	4.0276e-39	up
g13445	LG4	4451251	4452680	-	Chlorophyllase	15	7	5	1	4	0	16	75	50	292	216	252	0.18	0.0366667	0.983333	5.18333	6.015	2.589	0.000823473	0.00321458	up	30.679	4.939	9.66638e-41	1.01922e-38	up	28.487	4.832	6.1759e-06	3.79728e-05	up	148.424	7.214	1.74261e-25	3.75728e-24	up
g13451	LG4	4481567	4485444	+	--	16	25	13	28	34	37	80	43	142	151	72	56	0.576667	1.09	2.88667	3.02	5.439	2.443	1.75956e-05	0.000103289	up	5.603	2.486	2.55208e-07	1.78735e-06	up	2.659	1.411	0.0072504	0.0211637	up	2.74	1.454	0.00091376	0.00259927	up
g13454	LG4	4491857	4492576	+	--	6	7	2	7	0	0	23	10	58	80	32	17	0.153333	0.07	0.95	1.32667	6.839	2.774	0.00237229	0.00806865	up	9.377	3.229	2.1672e-05	0.000106348	up	13.374	3.741	0.00454582	0.0141172	up	18.232	4.188	4.16191e-05	0.00014956	up
g13631	LG4	5748802	5752653	-	Leucine rich repeat	0	2	0	0	0	0	28	4	5	23	20	35	0.00333333	0	0.09	0.2	19.054	4.252	0.0115198	0.0314693	up	42.282	5.402	1.11975e-05	5.83951e-05	up	61.897	5.952	0.00164423	0.00580208	up	137.627	7.105	3.88377e-07	1.86986e-06	up
g13827	LG4	7346388	7348350	-	--	82	132	122	255	190	305	648	816	727	565	536	684	2.09667	4.74333	13.7167	11.22	7.151	2.838	2.04955e-26	1.54995e-24	up	5.745	2.522	1.3513e-31	9.13026e-30	up	2.917	1.545	2.01616e-11	2.8101e-10	up	2.34	1.227	1.58467e-11	1.2409e-10	up
g13867	LG4	7684448	7687687	+	AUX/IAA family	1720	2229	1437	1548	1350	1246	5405	3161	4566	4754	3343	3810	37.9033	29.93	92.24	85	2.649	1.405	8.39947e-12	1.42684e-10	up	2.405	1.266	2.94558e-16	6.12458e-15	up	3.099	1.632	4.25178e-21	1.55552e-19	up	2.81	1.49	1.63873e-38	6.73926e-37	up
g13917	LG4	8056289	8059394	+	non-haem dioxygenase in morphine synthesis N-terminal	183	136	94	160	184	134	468	471	430	421	291	283	2.09333	2.50667	7.02	5.15	3.663	1.873	3.79732e-14	8.78611e-13	up	2.64	1.4	3.19898e-08	2.57532e-07	up	2.821	1.496	1.53328e-12	2.43649e-11	up	2.033	1.024	5.55251e-06	2.286e-05	up
g13933	LG4	8142129	8148071	+	Ciliary rootlet component, centrosome cohesion	29	12	21	13	26	25	96	179	78	97	46	93	0.13	0.136667	0.746667	0.493333	6.308	2.657	2.19992e-07	1.89346e-06	up	4.077	2.027	7.31151e-06	3.95772e-05	up	5.471	2.452	1.55248e-06	1.06952e-05	up	3.54	1.824	6.42827e-05	0.000223852	up
g1398	LG1	8494464	8496120	-	Lateral organ boundaries (LOB) domain	242	78	71	282	347	302	2460	3983	1608	723	626	901	2.68667	6.66333	56.4	15.85	23.134	4.532	4.09042e-12	7.29221e-11	up	6.352	2.667	8.8026e-07	5.60989e-06	up	8.558	3.097	1.96326e-25	1.00817e-23	up	2.355	1.236	2.03405e-14	2.04844e-13	up
g13985	LG4	8564185	8571638	+	Plant protein of unknown function	37	33	28	0	0	0	70	38	80	110	60	70	0.39	0	0.75	0.956667	2.097	1.069	0.0167763	0.043121	up	2.65	1.406	0.000120454	0.000506797	up	335.197	8.389	2.26606e-10	2.75417e-09	up	423.042	8.725	4.91339e-12	4.02262e-11	up
g14096	LG4	9449164	9451226	-	Cytochrome P450	22	28	14	18	19	33	133	289	164	83	69	102	0.28	0.313333	2.60333	1.12333	10.28	3.362	1.41371e-13	3.02273e-12	up	4.321	2.111	3.43154e-08	2.75148e-07	up	8.423	3.074	2.11191e-11	2.93309e-10	up	3.544	1.826	6.28053e-06	2.56504e-05	up
g14113	LG4	9598383	9602414	+	EamA-like transporter family	93	111	56	122	143	142	262	330	454	482	306	331	1.51	2.44667	6.24	6.61667	4.513	2.174	3.41201e-10	4.58353e-09	up	4.695	2.231	1.06456e-17	2.55871e-16	up	2.572	1.363	6.37462e-06	3.91099e-05	up	2.68	1.422	3.71799e-11	2.80494e-10	up
g14148	LG4	9814930	9816540	-	UDP-glucoronosyl and UDP-glucosyl transferase	28	28	2	0	8	0	142	159	34	107	110	64	0.27	0.04	1.58333	1.38	6.402	2.678	0.000558786	0.00228151	up	5.476	2.453	6.71519e-05	0.000298257	up	39.247	5.295	0.00334304	0.0107993	up	33.781	5.078	0.00205048	0.00543914	up
g14163	LG4	9919465	9921490	+	DNL zinc finger	57	50	59	64	57	66	198	175	174	218	167	274	0.816667	0.936667	2.68333	3.25333	3.587	1.843	3.49073e-12	6.2678e-11	up	4.276	2.096	3.11869e-16	6.46439e-15	up	2.883	1.527	1.36501e-09	1.49556e-08	up	3.434	1.78	1.91997e-12	1.63414e-11	up
g14219	LG4	10416555	10417127	-	--	33	14	12	18	21	6	127	147	130	61	47	51	0.746667	0.593333	5.21667	2.06667	7.617	2.929	2.30804e-11	3.69037e-10	up	2.962	1.566	0.00119463	0.00399575	up	8.872	3.149	2.315e-11	3.19965e-10	up	3.447	1.786	0.000851426	0.00243998	up
g14220	LG4	10420468	10420887	-	--	36	19	20	7	10	4	174	174	104	94	26	47	1.30667	0.376667	7.87667	2.90333	6.588	2.72	5.60785e-12	9.77525e-11	up	2.384	1.253	0.018261	0.043619	up	21.041	4.395	5.9416e-19	1.79902e-17	up	7.588	2.924	6.34467e-06	2.58916e-05	up
g14320	LG4	11201900	11204705	+	gag-polypeptide of LTR copia-type	0	0	0	0	0	0	10	4	9	13	5	3	0	0	0.0766667	0.0733333	44.944	5.49	0.00368309	0.011811	up	40.954	5.356	0.00370761	0.0109383	up	40.608	5.344	0.00622806	0.0185659	up	36.951	5.208	0.00684175	0.0160961	up
g14583	LG4	13314735	13319202	+	EamA-like transporter family	78	205	60	84	73	60	708	307	309	292	251	148	1.81333	1.19	6.91333	3.77667	4.126	2.045	6.1382e-06	3.97988e-05	up	2.233	1.159	0.00632982	0.0174343	up	5.844	2.547	9.28486e-15	1.86898e-13	up	3.154	1.657	9.61543e-08	5.00019e-07	up
g14712	LG4	14357811	14361063	+	Tetraspanin family	60	43	22	44	51	61	81	142	100	135	194	204	0.866667	1.12667	2.30667	3.84	2.912	1.542	0.000779809	0.00306266	up	4.741	2.245	4.1419e-10	4.32846e-09	up	2.07	1.05	0.00794861	0.0228688	up	3.378	1.756	9.3579e-09	5.47569e-08	up
g15089	LG4	17381337	17390890	-	GAG-pre-integrase domain	3	2	0	0	0	0	9	13	40	29	18	33	0.00666667	0	0.106667	0.133333	14.31	3.839	0.0012178	0.00452015	up	17.405	4.121	7.19277e-06	3.89977e-05	up	114.633	6.841	2.79151e-05	0.000149904	up	140.486	7.134	3.132e-07	1.52609e-06	up
g15168	LG4	17837740	17839036	+	Domain of unknown function (DUF2431)	0	0	0	0	0	0	2	22	11	57	52	76	0	0	0.353333	1.82	72.586	6.182	0.000923677	0.00354657	up	363.161	8.504	1.54267e-11	1.93278e-10	up	65.413	6.032	0.0015916	0.00563793	up	327.65	8.356	5.59284e-11	4.15113e-10	up
g15230	LG4	18305686	18307341	-	Complex1_LYR-like	59	61	50	31	27	21	140	117	137	118	87	120	0.756667	0.36	1.75	1.45667	2.536	1.342	2.22845e-06	1.59053e-05	up	2.072	1.051	0.000123132	0.00051687	up	4.919	2.298	2.75193e-11	3.76163e-10	up	4.015	2.005	7.32817e-09	4.33522e-08	up
g15296	LG4	18890743	18891381	+	--	4	1	0	0	1	2	8	27	12	8	7	22	0.0533333	0.0366667	0.553333	0.426667	10.827	3.437	0.00581969	0.017572	up	8.09	3.016	0.0124187	0.0313812	up	15.811	3.983	0.00288391	0.0095033	up	11.85	3.567	0.00750575	0.017483	up
g15331	LG4	19180700	19194261	-	RNase H-like domain found in reverse transcriptase	60	34	52	45	59	24	136	56	136	153	116	144	0.313333	0.276667	0.69	0.883333	2.428	1.28	0.00426352	0.0134128	up	3.062	1.615	6.93821e-08	5.30522e-07	up	2.489	1.316	0.00814246	0.0233402	up	3.138	1.65	3.68459e-06	1.55506e-05	up
g15395	LG4	19668589	19669818	+	--	2	2	2	0	0	2	159	92	152	205	146	182	0.0733333	0.0233333	4.94333	6.61667	72.949	6.189	1.14234e-18	4.39415e-17	up	96.224	6.588	1.96898e-24	8.2956e-23	up	197.724	7.627	4.42608e-12	6.69307e-11	up	260.373	8.024	3.89962e-14	3.82994e-13	up
g15613	LG4	21264395	21268235	-	Coiled-coil domain-containing protein 124 /Oxs1	0	0	1	6	1	0	11	28	12	24	3	29	0.00666667	0.0366667	0.273333	0.283333	52.914	5.726	0.000201802	0.000926876	up	54.466	5.767	0.000192336	0.000775676	up	7.444	2.896	0.0195015	0.0490877	up	7.647	2.935	0.0153304	0.0330281	up
g15653	LG4	21555520	21557355	-	EF-hand	113	125	160	85	75	118	664	556	436	288	343	326	1.67333	1.18	6.85	4.06667	4.473	2.161	4.38935e-19	1.77909e-17	up	2.617	1.388	6.70259e-09	5.97315e-08	up	5.838	2.546	3.17198e-27	1.80908e-25	up	3.41	1.77	1.74651e-13	1.62762e-12	up
g15751	LG4	22409630	22411709	-	non-haem dioxygenase in morphine synthesis N-terminal	13	1	15	181	283	619	51518	64468	45666	36174	37712	50040	0.166667	6.17	903.933	699.193	6058.76	12.565	1.02338e-79	7.87312e-77	up	4597.37	12.167	5.99608e-78	2.26646e-75	up	147.882	7.208	7.91249e-39	8.72461e-37	up	112.177	6.81	1.05138e-36	3.92819e-35	up
g15769	LG4	22567142	22572765	+	--	19	35	5	0	0	0	81	106	72	144	124	170	0.26	0	1.18667	2.02	4.912	2.296	0.000134617	0.000646113	up	8.17	3.03	7.78468e-11	8.91168e-10	up	465.496	8.863	3.513e-12	5.37375e-11	up	775.974	9.6	3.62838e-15	3.90235e-14	up
g15799	LG4	22786498	22805662	+	AAA domain	0	0	0	0	0	0	20	0	15	10	17	29	0	0	0.176667	0.293333	66.814	6.062	0.00649398	0.0193398	up	110.3	6.785	3.89796e-06	2.21625e-05	up	60.439	5.917	0.00975122	0.0272626	up	99.515	6.637	1.05669e-05	4.17654e-05	up
g15809	LG4	22907623	22908402	+	--	0	0	0	0	0	0	6	6	12	26	20	16	0	0	0.3	0.776667	48.313	5.594	0.00262396	0.00880156	up	122.45	6.936	8.56505e-07	5.47047e-06	up	43.61	5.447	0.00453998	0.0141015	up	110.5	6.788	2.77947e-06	1.19341e-05	up
g15887	LG4	23506049	23508452	-	Reverse transcriptase (RNA-dependent DNA polymerase)	0	0	0	0	0	0	3	19	3	9	8	2	0	0	0.0766667	0.06	51.275	5.68	0.00484945	0.0150192	up	38.076	5.251	0.00547937	0.0153709	up	46.214	5.53	0.00755922	0.0219214	up	34.37	5.103	0.00972034	0.0219917	up
g15907	LG4	23674349	23675759	-	--	8	4	5	0	0	0	102	35	80	32	37	41	0.176667	0	2.25333	1.17667	13.737	3.78	2.1682e-09	2.60633e-08	up	7.089	2.826	3.02209e-06	1.75385e-05	up	380.866	8.573	1.10111e-10	1.39599e-09	up	196.446	7.618	1.11733e-08	6.47855e-08	up
g16037	LG4	24829449	24830622	-	--	38	41	39	110	65	85	210	254	152	284	185	171	0.743333	1.65667	3.86333	4.05667	5.706	2.512	8.60899e-15	2.15386e-13	up	5.88	2.556	1.80443e-18	4.59618e-17	up	2.352	1.234	0.00010002	0.000474349	up	2.42	1.275	6.55833e-06	2.67288e-05	up
g16046	LG4	24884866	24889712	-	Polysaccharide biosynthesis protein	203	205	188	272	171	238	2130	2926	2162	1609	1107	1534	3.33333	3.87	40.69	23.9367	13.364	3.74	7.31855e-71	4.64728e-68	up	7.705	2.946	3.60486e-97	2.49028e-94	up	10.601	3.406	7.94691e-54	1.78222e-51	up	6.104	2.61	7.70439e-61	7.0702e-59	up
g16054	LG4	24934651	24935612	-	LURP-one-related	183	122	80	23	18	22	251	270	268	369	183	280	3.61667	0.613333	7.54667	7.92	2.281	1.189	0.000113704	0.000557167	up	2.348	1.231	4.5974e-05	0.000211316	up	12.435	3.636	4.05984e-32	3.1111e-30	up	12.805	3.679	1.00617e-30	2.85538e-29	up
g16110	LG4	25431614	25433112	+	HSF-type DNA-binding	83	105	66	74	71	91	797	237	784	242	139	183	1.55667	1.48333	11.1067	3.49	7.749	2.954	3.32212e-13	6.82596e-12	up	2.404	1.265	2.49793e-06	1.47118e-05	up	7.505	2.908	2.14068e-13	3.75329e-12	up	2.326	1.218	4.5003e-06	1.87587e-05	up
g16120	LG4	25516601	25517701	-	Flavodoxin-like fold	10	8	10	9	9	2	79	63	54	150	84	148	0.283333	0.206667	1.96	3.86	7.577	2.922	2.11645e-09	2.55026e-08	up	14.64	3.872	2.31034e-20	6.99158e-19	up	9.569	3.258	8.50189e-08	7.20039e-07	up	18.47	4.207	2.00103e-17	2.55682e-16	up
g16136	LG4	25646496	25649738	+	RING-variant domain	0	2	2	2	5	2	16	23	15	10	15	17	0.02	0.0433333	0.246667	0.19	14.72	3.88	0.000516672	0.00213153	up	11.395	3.51	0.00164397	0.00532103	up	5.913	2.564	0.00611254	0.0182585	up	4.574	2.193	0.023238	0.0477662	up
g16137	LG4	25653587	25654661	-	Flavodoxin-like fold	56	48	22	6	45	18	153	207	212	123	82	114	1.02	0.596667	4.77	2.64333	5.097	2.35	1.6693e-09	2.04096e-08	up	2.768	1.469	4.87966e-05	0.000223011	up	8.127	3.023	2.93799e-07	2.28405e-06	up	4.421	2.144	9.35069e-05	0.000317603	up
g16287	LG4	26899534	26901190	+	Glutathione S-transferase, C-terminal domain	34	19	45	2	21	2	55	174	50	150	177	112	0.803333	0.213333	2.29667	3.64	3.151	1.656	0.0080024	0.0231245	up	4.899	2.292	6.16888e-09	5.5295e-08	up	10.962	3.454	0.000137736	0.000635454	up	17.036	4.091	0.000106083	0.000357141	up
g16342	LG4	27330070	27332919	+	Interleukin-12 alpha subunit	7	14	5	5	11	5	23	55	20	71	21	57	0.0966667	0.0833333	0.376667	0.556667	4.222	2.078	0.00587307	0.0177227	up	6.118	2.613	2.68953e-05	0.000129117	up	4.637	2.213	0.00490271	0.0150769	up	6.737	2.752	2.65534e-05	9.86322e-05	up
g16370	LG4	27518348	27520612	+	Haemolysin-III related	121	118	112	102	96	131	492	420	455	185	238	316	2.08	1.99333	8.1	4.45	4.251	2.088	1.66363e-29	1.55137e-27	up	2.296	1.199	1.59694e-06	9.75671e-06	up	4.097	2.035	2.38874e-23	1.05123e-21	up	2.211	1.145	1.32124e-05	5.13568e-05	up
g16391	LG4	27684192	27684896	-	Leucine Rich Repeat	23	12	10	3	2	1	88	85	38	28	37	32	0.463333	0.0633333	2.18	1.03667	5.118	2.356	1.54162e-05	9.17199e-05	up	2.392	1.258	0.0211199	0.0494642	up	34.35	5.102	2.12426e-10	2.59215e-09	up	16.059	4.005	2.35069e-06	1.01787e-05	up
g16408	LG4	27812929	27816718	-	Leucine rich repeat N-terminal domain	142	98	39	9	7	6	154	246	158	312	434	358	0.53	0.0433333	1.09333	2.19667	2.258	1.175	0.00864386	0.0246769	up	4.447	2.153	1.48188e-09	1.44182e-08	up	25.331	4.663	1.5575e-22	6.46029e-21	up	49.943	5.642	3.53659e-46	2.00868e-44	up
g16431	LG4	28003170	28006166	+	Leucine Rich Repeat	7	7	0	10	0	4	19	43	33	13	20	56	0.0366667	0.0366667	0.263333	0.243333	7.782	2.96	0.00128894	0.00475243	up	6.99	2.805	0.00220265	0.00690614	up	6.988	2.805	0.00443849	0.0138185	up	6.27	2.648	0.00560487	0.0134742	up
g16611	LG5	18129	21261	-	Cell division control protein 24, OB domain 3	1358	1161	950	63	63	76	4570	3546	3624	3133	2280	2745	11.4033	0.683333	38.5733	27.1833	3.694	1.885	6.95791e-44	1.52104e-41	up	2.56	1.356	1.24288e-26	6.11774e-25	up	56.999	5.833	0	0	up	39.469	5.303	8.3577e-280	2.1331e-276	up
g16696	LG5	653100	655058	-	AAA ATPase domain	506	353	550	514	502	515	2750	3287	2284	1787	1859	1462	5.66	6.23667	33.2267	20.77	6.437	2.686	5.12477e-30	4.96408e-28	up	3.957	1.985	1.17924e-21	3.92106e-20	up	5.377	2.427	2.24387e-45	3.25075e-43	up	3.303	1.724	1.81878e-31	5.36272e-30	up
g16719	LG5	773680	775606	+	Cytochrome P450	327	246	317	255	595	339	918	1914	598	1815	1192	783	3.85	5.3	14.89	16.5333	4.256	2.09	5.84287e-08	5.55871e-07	up	4.626	2.21	5.9795e-17	1.33994e-15	up	2.846	1.509	0.0172509	0.0442675	up	3.096	1.631	0.00163466	0.00442436	up
g1688	LG1	10685122	10689609	-	--	3	7	20	5	11	8	83	130	31	31	29	38	0.106667	0.0833333	0.84	0.34	8.625	3.109	5.16989e-05	0.000274444	up	3.449	1.786	0.011326	0.028958	up	9.962	3.316	9.58459e-07	6.84267e-06	up	3.977	1.992	0.00139553	0.00382812	up
g17020	LG5	2516982	2519851	+	NAD(P)H-binding	4	2	12	200	288	446	31817	38311	23303	15838	16028	20184	0.11	5.67333	554.48	312.96	5570.05	12.443	1.18129e-83	1.00548e-80	up	3109.66	11.603	6.473e-123	7.8592e-120	up	98.606	6.624	1.5387e-132	1.9087e-129	up	54.596	5.771	5.06847e-62	4.79123e-60	up
g17021	LG5	2521382	2523346	+	Polysaccharide biosynthesis protein	46	26	26	45	43	123	1232	1188	991	155	197	333	0.593333	1.31	20.7933	4.23	38.14	5.253	3.3549e-105	4.4737e-102	up	7.627	2.931	3.30106e-16	6.82618e-15	up	15.966	3.997	6.37355e-31	4.59162e-29	up	3.185	1.671	4.10202e-05	0.000147674	up
g17109	LG5	3110129	3112343	-	Myb-like DNA-binding domain	0	0	0	0	0	0	6	11	7	8	13	6	0	0	0.106667	0.123333	48.254	5.593	0.0024478	0.00828895	up	54.578	5.77	0.000566109	0.00205828	up	43.544	5.444	0.00428666	0.0134036	up	49.274	5.623	0.0012683	0.00350596	up
g17112	LG5	3130359	3130933	-	--	196	204	125	175	166	128	751	842	561	478	775	867	6.66667	6.14333	27.5667	27.7267	4.518	2.176	2.46461e-19	1.02705e-17	up	4.467	2.159	7.56173e-17	1.67205e-15	up	4.528	2.179	1.18441e-21	4.58239e-20	up	4.475	2.162	4.07996e-19	5.93353e-18	up
g17113	LG5	3131638	3133728	+	--	8	15	4	4	14	44	563	398	518	105	250	184	0.15	0.37	8.57333	3.24	59.868	5.904	1.15853e-55	4.58882e-53	up	22.435	4.488	5.78037e-19	1.53889e-17	up	23.398	4.548	7.12431e-08	6.10666e-07	up	8.743	3.128	0.00082852	0.00237968	up
g17138	LG5	3295050	3297267	+	Myb-like DNA-binding domain	0	0	2	0	0	0	658	296	353	312	345	430	0.01	0	6.52333	5.62	694.199	9.439	1.06373e-18	4.12352e-17	up	591.722	9.209	1.19059e-18	3.08759e-17	up	2279.19	11.154	7.01692e-20	2.31151e-18	up	1935.87	10.919	9.3987e-20	1.42576e-18	up
g17172	LG5	3561080	3562028	-	VQ motif	0	2	0	0	0	0	39	88	38	27	41	20	0.0166667	0	1.29667	0.706667	92.151	6.526	9.43941e-08	8.67965e-07	up	49.206	5.621	5.2724e-06	2.92346e-05	up	299.983	8.229	1.89684e-09	2.04217e-08	up	160.263	7.324	1.50348e-07	7.63461e-07	up
g17259	LG5	4211461	4214022	+	Zinc-finger domain of monoamine-oxidase A repressor R1	16	20	6	12	24	21	45	38	55	65	76	32	0.213333	0.3	0.713333	0.913333	3.653	1.869	0.0012233	0.00453761	up	4.629	2.211	0.000101107	0.000434009	up	2.383	1.253	0.0184811	0.0469359	up	3.02	1.594	0.00287799	0.00738059	up
g17276	LG5	4341927	4343503	-	PMR5 N terminal Domain	34	12	70	26	108	54	164	373	119	152	146	138	0.6	0.983333	3.33	2.22667	6.122	2.614	3.21722e-05	0.000178262	up	4.011	2.004	5.98289e-05	0.000268538	up	3.435	1.78	0.00209972	0.00720258	up	2.251	1.171	0.0071241	0.0166787	up
g17358	LG5	4934733	4936361	+	UDP-glucoronosyl and UDP-glucosyl transferase	0	2	0	0	0	4	12	42	7	46	60	43	0.01	0.02	0.303333	0.74	34.379	5.103	0.000715521	0.00283691	up	82.427	6.365	2.64984e-08	2.15926e-07	up	15.468	3.951	0.00608126	0.0181829	up	37.173	5.216	2.24629e-08	1.25746e-07	up
g17579	LG5	6538285	6539889	+	Plant protein 1589 of unknown function (A_thal_3526)	39	67	38	16	27	39	180	378	177	233	221	230	1.49333	0.873333	7.75333	7.23	5.689	2.508	5.0843e-09	5.78327e-08	up	5.192	2.376	4.33104e-18	1.07052e-16	up	8.96	3.163	1.29345e-11	1.84954e-10	up	8.19	3.034	1.67158e-21	2.82309e-20	up
g17610	LG5	6763661	6767082	-	Leucine Rich repeat	1	5	3	5	7	5	17	44	24	76	55	65	0.0266667	0.0466667	0.226667	0.523333	10.521	3.395	0.00016267	0.000765511	up	23.567	4.559	7.9639e-13	1.15403e-11	up	5.022	2.328	0.00281278	0.00929825	up	11.248	3.492	1.39724e-10	9.9597e-10	up
g17734	LG5	7645722	7646581	-	Cystatin domain	3	1	2	6	4	0	60	39	34	46	62	49	0.05	0.0866667	1.12333	1.37667	23.876	4.577	1.51367e-08	1.59816e-07	up	28.868	4.851	1.33094e-10	1.47925e-09	up	12.932	3.693	7.01233e-06	4.26989e-05	up	15.631	3.966	3.95862e-08	2.15372e-07	up
g17759	LG5	7820704	7824068	-	RNA silencing suppressor P21 C-terminal domain	4	0	7	5	3	0	27	8	42	33	14	31	0.03	0.02	0.196667	0.2	7.504	2.908	0.00763809	0.022213	up	7.441	2.895	0.000994689	0.00339618	up	9.54	3.254	0.00337541	0.0108924	up	9.405	3.233	0.000442069	0.00133807	up
g17766	LG5	7880876	7884498	-	Leucine rich repeat N-terminal domain	3	4	4	0	2	0	37	78	18	96	106	143	0.0366667	0.00666667	0.416667	1.09333	13.312	3.735	5.32455e-06	3.49998e-05	up	34.099	5.092	1.46103e-20	4.47547e-19	up	65.559	6.035	4.18059e-06	2.65391e-05	up	168.909	7.4	9.18406e-12	7.34959e-11	up
g17771	LG5	7922802	7926618	-	Leucine Rich repeat	0	2	0	0	0	0	12	12	5	17	18	27	0.00666667	0	0.0833333	0.176667	15.806	3.982	0.0131433	0.0351727	up	33.797	5.079	6.4552e-05	0.000287762	up	51.283	5.68	0.00191219	0.00662747	up	109.96	6.781	2.84239e-06	1.21854e-05	up
g17773	LG5	7935415	7938468	-	RNA silencing suppressor P21 C-terminal domain	13	2	6	6	5	9	43	55	40	31	58	66	0.0633333	0.06	0.413333	0.47	7.279	2.864	3.54074e-05	0.000194544	up	8.165	3.029	3.62763e-06	2.077e-05	up	6.856	2.777	5.28921e-06	3.2898e-05	up	7.694	2.944	1.27304e-06	5.72166e-06	up
g17832	LG5	8350872	8352595	+	Ribonuclease T2 family	5	4	4	27	24	45	98	229	68	53	187	132	0.11	0.83	3.38667	3.28333	33.793	5.079	3.40589e-14	7.91706e-13	up	32.137	5.006	2.3831e-15	4.51247e-14	up	4.13	2.046	0.000172235	0.000776036	up	3.928	1.974	5.69769e-05	0.000200549	up
g17956	LG5	9333271	9334851	-	Fungal family of unknown function (DUF1776)	4	0	3	0	0	0	120	155	188	32	47	128	0.0533333	0	3.52	1.55667	73.404	6.198	1.31632e-19	5.63203e-18	up	31.738	4.988	1.48422e-09	1.44345e-08	up	839.92	9.714	7.35434e-15	1.49862e-13	up	363.42	8.505	1.76229e-10	1.2408e-09	up
g17970	LG5	9480956	9482436	+	NAD dependent epimerase/dehydratase family	4	4	0	0	2	0	561	655	956	61	42	164	0.06	0.0166667	16.91	2.03667	303.427	8.245	7.09723e-43	1.45602e-40	up	35.917	5.167	1.46365e-11	1.83894e-10	up	1086.69	10.086	2.5226e-21	9.49142e-20	up	127.253	6.992	1.92899e-09	1.21696e-08	up
g17971	LG5	9483066	9485999	+	Fungal family of unknown function (DUF1776)	10	7	6	0	2	0	347	365	674	30	32	141	0.133333	0.0133333	8.32	1.19	67.293	6.072	7.66978e-39	1.24727e-36	up	9.429	3.237	2.36343e-06	1.39875e-05	up	693.932	9.439	3.23061e-18	9.13385e-17	up	96.532	6.593	7.80874e-08	4.10248e-07	up
g17975	LG5	9507233	9509863	+	NAD dependent epimerase/dehydratase family	1	2	4	0	0	0	418	770	576	6	46	117	0.05	0	11.8333	1.13	279.646	8.127	3.93874e-37	5.96854e-35	up	25.74	4.686	2.53813e-06	1.49222e-05	up	3210.95	11.649	1.66995e-21	6.3862e-20	up	298.77	8.223	5.28239e-05	0.000186881	up
g17992	LG5	9611736	9613768	-	--	0	0	0	0	0	0	75	46	30	34	12	21	0	0	1.77	0.803333	291.744	8.189	9.17702e-10	1.16437e-08	up	129.505	7.017	8.21559e-07	5.2651e-06	up	263.635	8.042	2.6077e-09	2.76181e-08	up	116.818	6.868	2.41534e-06	1.04442e-05	up
g17993	LG5	9615672	9617208	-	GRAS domain family	12	10	4	30	37	24	279	427	244	137	122	168	0.123333	0.45	4.58	2.06667	40.638	5.345	1.00179e-32	1.12259e-30	up	17.929	4.164	4.07498e-24	1.65826e-22	up	10.354	3.372	3.7183e-21	1.37173e-19	up	4.578	2.195	1.10051e-11	8.75033e-11	up
g18137	LG5	10727634	10731322	+	Clc-like	172	244	86	59	108	80	316	500	600	450	323	440	1.63667	0.843333	4.78	4.04667	3.193	1.675	2.05373e-05	0.000118816	up	2.645	1.403	1.68752e-06	1.02632e-05	up	5.732	2.519	2.67272e-12	4.12976e-11	up	4.761	2.251	3.65225e-20	5.66452e-19	up
g18180	LG5	11043057	11044971	+	Actin	0	0	0	0	0	0	38	99	34	51	41	36	0	0	1.65	1.23333	345.406	8.432	1.00341e-09	1.26869e-08	up	252.718	7.981	7.16341e-10	7.26992e-09	up	311.536	8.283	2.59408e-09	2.74885e-08	up	228.049	7.833	2.58215e-09	1.60718e-08	up
g18251	LG5	11624699	11628088	+	MuDR family transposase	0	0	0	0	0	0	16	0	12	16	7	17	0	0	0.123333	0.176667	53.457	5.74	0.0138222	0.0366633	up	77.283	6.272	4.68893e-05	0.000215079	up	48.355	5.596	0.0198732	0.0498808	up	69.703	6.123	0.000125425	0.000416963	up
g1846	LG1	11979053	11980173	+	Eukaryotic protein of unknown function (DUF953)	20	18	40	19	13	24	106	105	101	89	81	114	0.773333	0.546667	3.02333	2.77333	4.312	2.108	2.05311e-06	1.47698e-05	up	3.892	1.961	2.27261e-06	1.34959e-05	up	5.522	2.465	6.61239e-10	7.56205e-09	up	4.975	2.315	4.87476e-09	2.94091e-08	up
g185	LG1	1015043	1015618	-	Protease inhibitor/seed storage/LTP family	27	17	32	41	97	51	183	353	137	137	600	517	0.983333	2.50333	8.67333	16.62	9.73	3.282	2.33879e-12	4.32962e-11	up	18.308	4.194	4.43726e-09	4.06464e-08	up	3.512	1.812	0.000153856	0.000701184	up	6.617	2.726	0.000259566	0.000818208	up
g18611	LG5	14302873	14308525	+	--	0	0	0	0	0	0	9	6	7	10	10	8	0	0	0.0833333	0.11	43.149	5.431	0.00383419	0.0122295	up	55.58	5.796	0.00038552	0.00145675	up	38.976	5.284	0.00655785	0.0194206	up	50.161	5.648	0.000951	0.00269672	up
g18942	LG5	16677478	16681786	-	Amino acid permease	12	24	16	18	11	17	42	70	31	49	28	56	0.24	0.216667	0.666667	0.616667	3.025	1.597	0.00571879	0.0173315	up	2.741	1.455	0.00343505	0.0102207	up	3.104	1.634	0.00458182	0.0142168	up	2.809	1.49	0.00377968	0.00946938	up
g19062	LG5	17554962	17555586	+	gag-polypeptide of LTR copia-type	1	0	0	0	0	0	4	26	6	9	2	21	0.01	0	0.44	0.37	37.962	5.246	0.00270538	0.00903709	up	31.188	4.963	0.00327307	0.00979695	up	66.667	6.059	0.00124309	0.00454033	up	54.753	5.775	0.00132906	0.00365856	up
g19167	LG5	18500676	18502526	+	Hydroxymethylglutaryl-coenzyme A reductase	35	16	16	6	49	11	226	504	434	250	129	255	0.263333	0.276667	4.73667	2.52	19.678	4.298	3.58839e-22	1.95045e-20	up	10.208	3.352	1.00568e-19	2.85777e-18	up	17.384	4.12	1.18897e-05	6.89258e-05	up	9.042	3.177	0.00032577	0.00100692	up
g19329	LG5	19972508	19976590	+	--	40	32	27	13	8	14	87	214	97	46	58	84	0.263333	0.0933333	1.08333	0.513333	4.509	2.173	5.2985e-06	3.484e-05	up	2.075	1.053	0.0079146	0.0211932	up	11.49	3.522	1.02749e-10	1.30893e-09	up	5.29	2.403	1.74015e-06	7.67745e-06	up
g19429	LG5	20647945	20651850	-	--	32	28	37	69	50	90	243	98	203	167	188	274	0.286667	0.633333	1.59667	1.89	6.008	2.587	1.01273e-10	1.47971e-09	up	7.021	2.812	6.25892e-20	1.80674e-18	up	2.541	1.345	0.000542438	0.00216904	up	2.959	1.565	1.24969e-07	6.40964e-07	up
g19432	LG5	20665075	20666525	+	--	513	460	416	203	228	309	926	1194	777	1616	1378	1844	7.69	4.19667	16.13	27.12	2.296	1.199	2.06737e-08	2.12719e-07	up	3.784	1.92	2.26017e-58	4.76623e-56	up	3.878	1.955	1.11032e-15	2.46363e-14	up	6.39	2.676	2.32247e-65	2.45072e-63	up
g19492	LG5	21215607	21223833	+	Reverse transcriptase-like	70	51	28	56	44	78	168	569	230	330	289	354	0.21	0.26	1.42667	1.41667	7.407	2.889	1.25718e-08	1.34367e-07	up	7.168	2.842	6.45666e-26	3.05069e-24	up	5.526	2.466	3.17283e-07	2.45269e-06	up	5.368	2.424	4.27067e-24	8.45786e-23	up
g19584	LG5	21885141	21888843	-	PMR5 N terminal Domain	89	35	68	124	94	136	494	474	393	277	271	265	0.75	1.40667	5.29333	3.22	7.733	2.951	3.37962e-20	1.52598e-18	up	4.625	2.21	6.74376e-13	9.85421e-12	up	3.795	1.924	5.19267e-20	1.73067e-18	up	2.268	1.181	3.85101e-08	2.09937e-07	up
g19598	LG5	22009856	22010970	-	Protein of unknown function (DUF1191)	26	45	24	20	8	13	297	138	181	140	143	148	0.623333	0.273333	3.99667	2.89333	6.957	2.798	2.30886e-13	4.8258e-12	up	4.968	2.313	8.4147e-13	1.2154e-11	up	14.607	3.869	2.90652e-19	8.99956e-18	up	10.404	3.379	1.40101e-18	1.96002e-17	up
g19713	LG5	22964604	22975223	+	Haspin like kinase domain	452	487	505	436	389	306	1243	1354	835	1156	1107	1323	2.39	1.90667	5.64667	5.99333	2.582	1.369	2.02545e-10	2.82426e-09	up	2.694	1.43	4.54888e-26	2.16461e-24	up	2.987	1.579	1.01519e-12	1.64682e-11	up	3.113	1.638	8.33324e-29	2.16617e-27	up
g19793	LG5	23636661	23642900	-	P-loop containing dynein motor region	1915	1211	1006	1306	1375	886	5305	7855	4759	2295	2090	3279	7.69333	6.86667	33.87	14.52	4.833	2.273	2.68867e-17	8.91137e-16	up	2.026	1.019	8.00837e-07	5.14382e-06	up	4.985	2.318	2.84633e-21	1.05962e-19	up	2.092	1.065	1.32461e-09	8.47857e-09	up
g19864	LG5	24124532	24126290	+	Methyltransferase domain	0	0	0	0	1	0	5895	8105	2577	7388	5890	8860	0	0.00666667	127.423	172.187	32762.9	15	4.22917e-28	3.5921e-26	up	43337.3	15.403	1.29247e-38	1.23593e-36	up	15184.3	13.89	2.39072e-25	1.22293e-23	up	20075.8	14.293	1.36073e-33	4.4207e-32	up
g19878	LG5	24236731	24238872	+	Leucine Rich Repeat	11	27	23	20	28	26	70	61	44	119	74	79	0.456667	0.566667	1.28667	2.03667	3.086	1.626	0.00140533	0.00511922	up	4.796	2.262	1.28963e-07	9.44288e-07	up	2.307	1.206	0.00644139	0.0191142	up	3.579	1.839	2.12213e-06	9.24584e-06	up
g20001	LG5	25223619	25225305	-	Methyltransferase domain	0	0	0	0	1	0	4845	7019	2186	1307	991	1407	0	0.00666667	91.6367	24.4133	27819.7	14.764	5.7927e-27	4.56175e-25	up	7256.19	12.825	3.25881e-27	1.65489e-25	up	12892.2	13.654	6.02506e-24	2.78747e-22	up	3361.46	11.715	5.23144e-23	9.70633e-22	up
g20072	LG5	25684164	25689287	+	--	99	116	65	63	49	63	164	211	162	290	159	202	0.66	0.42	1.27667	1.55	2.126	1.088	0.000471088	0.00196803	up	2.523	1.335	1.78278e-06	1.0795e-05	up	3.054	1.611	8.44657e-08	7.1566e-07	up	3.624	1.857	1.91846e-11	1.48859e-10	up
g20081	LG5	25737462	25741157	+	Leucine Rich repeats (2 copies)	28	28	44	77	50	72	285	184	270	222	185	278	0.246667	0.49	1.78	1.66667	7.963	2.993	7.59448e-19	3.00215e-17	up	7.356	2.879	2.68004e-22	9.42768e-21	up	3.66	1.872	6.84202e-11	8.91349e-10	up	3.371	1.753	6.0784e-12	4.92703e-11	up
g20103	LG5	25881413	25882857	-	--	9	5	1	2	3	1	34	23	39	33	28	28	0.0833333	0.0366667	0.553333	0.516667	7.132	2.834	0.000324541	0.00141343	up	6.572	2.716	0.000152091	0.000626486	up	15.732	3.976	7.31849e-06	4.43862e-05	up	14.53	3.861	6.58306e-06	2.68269e-05	up
g20109	LG5	25922691	25927131	-	MTH538 TIR-like domain (DUF1863)	7	11	12	8	19	13	57	58	63	63	60	98	0.0666667	0.09	0.393333	0.49	6.477	2.695	1.43841e-07	1.2796e-06	up	7.934	2.988	2.06687e-10	2.24305e-09	up	4.376	2.13	5.63274e-05	0.000282384	up	5.357	2.421	5.92149e-07	2.78493e-06	up
g20110	LG5	25929125	25933101	-	Leucine Rich repeats (2 copies)	194	252	84	169	160	143	595	845	538	2012	1405	1832	1.51333	1.4	5.77333	15.3467	4.174	2.061	1.03017e-08	1.11353e-07	up	10.856	3.44	2.35335e-38	2.20307e-36	up	4.164	2.058	9.14991e-17	2.27146e-15	up	10.845	3.439	1.5348e-140	7.4616e-138	up
g20111	LG5	25933631	25935151	-	ATPase family associated with various cellular activities (AAA)	224	211	106	146	123	179	429	505	334	1137	955	1021	2.83	2.42	6.73333	16.7233	2.598	1.378	4.46317e-06	2.98178e-05	up	6.331	2.662	1.94745e-35	1.57952e-33	up	2.802	1.487	2.04172e-09	2.18807e-08	up	6.829	2.772	2.33705e-72	3.1707e-70	up
g20117	LG5	25978736	25982386	+	--	53	45	38	217	228	227	659	859	514	653	427	448	0.563333	2.86667	8.49	6.42667	16.455	4.04	6.52153e-47	1.71641e-44	up	12.207	3.61	2.94908e-53	5.02811e-51	up	2.991	1.581	1.9332e-11	2.70301e-10	up	2.22	1.151	5.38011e-10	3.59999e-09	up
g20164	LG5	26265588	26270066	-	TIR domain	494	512	398	116	63	92	3275	2604	2896	2741	2087	2607	3.79333	0.746667	23.7467	20.3533	6.827	2.771	2.12312e-98	2.35932e-95	up	5.754	2.525	1.028e-108	8.7637e-106	up	31.982	4.999	3.3807e-164	7.894e-161	up	26.906	4.75	1.0414e-209	1.1814e-206	up
g20167	LG5	26286190	26291446	-	AAA ATPase domain	1270	1207	992	683	478	442	4077	2725	3388	3345	2896	3560	7.82667	3.69667	22.94	22.45	3.196	1.676	4.15045e-30	4.05962e-28	up	3.078	1.622	1.42817e-60	3.25128e-58	up	6.243	2.642	2.33768e-47	3.80304e-45	up	6.007	2.587	1.09619e-79	1.79779e-77	up
g20202	LG5	26483698	26484133	-	--	72	46	31	8	27	13	138	171	87	94	125	74	2.48667	0.843333	6.67667	5.09	2.94	1.556	0.000178759	0.00083125	up	2.203	1.139	0.00413993	0.012047	up	8.036	3.007	1.19368e-08	1.14591e-07	up	6.034	2.593	2.37448e-07	1.17649e-06	up
g20297	LG5	27035763	27037520	+	Protein phosphatase 2C	2250	2727	1656	1984	1561	1472	8324	4839	6517	8530	7004	4778	32.1833	24.9967	95.3033	100.98	3.224	1.689	1.24998e-16	3.84067e-15	up	3.373	1.754	1.675e-16	3.59081e-15	up	3.833	1.939	7.57439e-29	4.81065e-27	up	4.006	2.002	8.48983e-14	8.13466e-13	up
g20330	LG5	27227973	27230785	-	UDP-glucoronosyl and UDP-glucosyl transferase	139	160	136	129	84	59	360	291	185	518	538	1018	2.01333	1.28	3.81667	9.65667	2.072	1.051	7.96405e-05	0.000404317	up	5.148	2.364	3.89504e-21	1.25251e-19	up	3.003	1.587	4.37783e-06	2.76716e-05	up	7.449	2.897	8.95762e-24	1.73943e-22	up
g20342	LG5	27305559	27314777	+	Reverse transcriptase-like	112	83	13	8	19	11	615	555	1255	224	149	369	0.343333	0.0666667	4.21667	1.26333	13.357	3.739	8.99219e-06	5.63211e-05	up	3.923	1.972	0.0139686	0.0347456	up	63.604	5.991	9.45231e-42	1.22218e-39	up	18.731	4.227	1.53537e-24	3.13657e-23	up
g20349	LG5	27348609	27350278	+	Transferase family	59	25	7	12	12	0	304	325	675	69	76	162	0.44	0.123333	6.64667	1.54333	16.443	4.039	1.26806e-12	2.4483e-11	up	3.734	1.901	0.00130037	0.00431557	up	54.454	5.767	7.26919e-07	5.30326e-06	up	12.394	3.632	1.6048e-08	9.14656e-08	up
g20353	LG5	27368109	27370244	-	Major intrinsic protein	413	347	318	291	214	250	738	454	1232	874	1521	865	5.9	4.22	13.45	18.5	2.488	1.315	0.000100889	0.000499948	up	3.386	1.759	1.19111e-11	1.51361e-10	up	3.206	1.681	5.73197e-07	4.25609e-06	up	4.36	2.124	9.60916e-18	1.26096e-16	up
g20403	LG5	27834549	27837069	+	MSP (Major sperm protein) domain	128	76	109	104	44	72	401	262	192	176	228	213	1.55667	1.10333	4.16667	3.12667	2.924	1.548	8.17137e-07	6.33764e-06	up	2.163	1.113	5.51566e-05	0.000249487	up	3.793	1.923	6.24315e-08	5.38626e-07	up	2.8	1.486	2.4063e-06	1.04084e-05	up
g2041	LG1	13651638	13655799	+	Domain of unknown function (DUF4219)	95	124	117	236	140	146	311	569	302	671	407	385	0.73	1.14667	2.59	3.19667	3.884	1.957	8.07908e-09	8.87922e-08	up	4.7	2.233	2.29458e-19	6.30527e-18	up	2.276	1.187	0.000531328	0.00212986	up	2.751	1.46	5.87485e-09	3.51415e-08	up
g20441	LG5	28028974	28031006	-	Chalcone-flavanone isomerase	25	25	36	102	118	181	2324	2823	1530	882	1131	1113	0.543333	2.56333	41.68	19.9433	84.362	6.399	3.9335e-101	4.62821e-98	up	39.73	5.312	2.6012e-101	1.96644e-98	up	16.418	4.037	7.96046e-50	1.46972e-47	up	7.716	2.948	7.61344e-42	3.65777e-40	up
g20463	LG5	28159811	28164766	+	Chlorophyll A-B binding protein	149	149	89	121	95	142	791	1331	523	535	536	574	1.24	1.17333	8.56667	5.38333	7.597	2.925	9.5955e-17	2.98963e-15	up	4.671	2.224	3.45871e-29	2.0026e-27	up	7.364	2.881	1.3171e-17	3.52069e-16	up	4.532	2.18	3.18889e-32	9.70379e-31	up
g20500	LG5	28390918	28393670	-	Plant invertase/pectin methylesterase inhibitor	65	40	14	38	50	22	1391	2172	1649	359	355	340	0.496667	0.486667	22.59	4.59	49.525	5.63	4.05293e-48	1.14991e-45	up	9.86	3.302	4.1975e-20	1.23421e-18	up	47.17	5.56	4.96252e-72	1.82395e-69	up	9.411	3.234	1.68537e-30	4.73027e-29	up
g20503	LG5	28407736	28408590	-	Plant invertase/pectin methylesterase inhibitor	92	94	85	121	76	177	346	360	313	170	297	359	2.33333	3.27	8.79	7.26	4.117	2.042	3.65734e-21	1.8404e-19	up	3.344	1.742	7.23079e-09	6.40539e-08	up	2.707	1.437	2.73572e-06	1.79703e-05	up	2.197	1.136	0.000759009	0.0021964	up
g20587	LG5	28939878	28943484	+	Cytochrome P450	43	39	10	0	14	21	188	328	49	160	181	82	0.356667	0.143333	2.22333	1.71667	6.868	2.78	2.79905e-05	0.000157138	up	5.194	2.377	1.2068e-06	7.50121e-06	up	15.759	3.978	0.00629426	0.0187379	up	11.97	3.581	0.00529452	0.012802	up
g20601	LG5	29026399	29028906	-	Polysaccharide biosynthesis C-terminal domain	7	5	3	7	11	13	1047	161	1207	342	411	452	0.0633333	0.136667	10.2767	5.25333	175.581	7.456	3.33639e-16	9.7354e-15	up	88.093	6.461	3.08924e-50	4.65325e-48	up	75.666	6.242	2.60936e-13	4.53099e-12	up	38.314	5.26	1.04361e-53	7.54302e-52	up
g20683	LG5	29507312	29511513	-	Sugar-tranasporters, 12 TM	276	376	246	204	172	158	723	795	554	494	489	671	3.33333	2.03333	7.71333	6.23333	2.529	1.339	4.5759e-09	5.24074e-08	up	2.006	1.004	3.25075e-07	2.23372e-06	up	3.831	1.938	1.36348e-20	4.80242e-19	up	3.037	1.603	1.23763e-18	1.73443e-17	up
g20861	LG5	30497314	30500882	+	Cofactor assembly of complex C subunit B, CCB2/CCB4	27	10	13	61	44	23	187	98	153	74	99	143	0.203333	0.536667	1.77667	1.31	9.53	3.252	5.553e-13	1.11296e-11	up	6.931	2.793	7.73739e-10	7.81286e-09	up	3.344	1.741	4.25623e-05	0.000218792	up	2.429	1.281	0.00224607	0.00590273	up
g21274	LG6	3029484	3035105	-	Ankyrin repeats (many copies)	24	18	10	14	27	17	278	16	209	98	52	105	0.296667	0.346667	2.84667	1.47667	10.359	3.373	9.77565e-06	6.07259e-05	up	5.304	2.407	3.56859e-08	2.85395e-07	up	8.213	3.038	6.77374e-05	0.000333437	up	4.221	2.078	3.23075e-06	1.37246e-05	up
g21310	LG6	3336284	3339292	-	Retinal pigment epithelial membrane protein	13	14	12	9	19	6	82	66	52	72	51	99	0.256667	0.233333	1.3	1.46333	5.556	2.474	5.22507e-08	5.02231e-07	up	6.128	2.615	2.07362e-09	1.9763e-08	up	5.693	2.509	1.06505e-05	6.22915e-05	up	6.279	2.651	5.03607e-07	2.38942e-06	up
g21333	LG6	3558100	3559972	-	--	4	6	21	16	9	20	80	20	38	49	80	49	0.146667	0.21	0.616667	0.843333	4.537	2.182	0.0068223	0.0201511	up	6.212	2.635	4.7059e-05	0.000215783	up	2.937	1.554	0.0180839	0.0460566	up	3.983	1.994	0.000116879	0.000390715	up
g21335	LG6	3580267	3588012	-	Retinal pigment epithelial membrane protein	45	67	26	149	139	107	435	245	247	258	220	406	0.546667	1.62	3.66	3.57	7.264	2.861	8.36621e-16	2.34377e-14	up	6.967	2.801	1.59499e-17	3.76584e-16	up	2.271	1.184	1.13097e-05	6.57787e-05	up	2.176	1.122	8.44975e-06	3.38894e-05	up
g21441	LG6	4357151	4360500	+	Hpt domain	20	12	12	34	39	38	99	94	57	107	148	156	0.453333	1.17333	2.56333	4.34	6.193	2.631	1.16947e-08	1.25462e-07	up	10.283	3.362	2.41028e-18	6.08139e-17	up	2.202	1.139	0.00329554	0.0106719	up	3.657	1.871	1.0967e-08	6.36347e-08	up
g21443	LG6	4380351	4382045	+	AUX/IAA family	364	506	217	168	153	162	705	688	632	610	1615	1408	7.39333	3.39667	13.9567	25.8267	2.058	1.041	0.000134165	0.000644329	up	3.759	1.91	0.00046588	0.00172613	up	4.139	2.049	1.60689e-36	1.52963e-34	up	7.554	2.917	3.09749e-10	2.1294e-09	up
g21771	LG6	6978650	6979669	-	Flavodoxin-like fold	34	16	34	9	16	11	78	59	88	204	159	166	0.75	0.333333	2	4.75	2.916	1.544	0.000829749	0.00323466	up	6.82	2.77	6.68063e-17	1.48625e-15	up	6.14	2.618	1.28206e-07	1.05628e-06	up	14.363	3.844	1.8646e-25	4.01395e-24	up
g21922	LG6	7988301	7997862	-	Cid1 family poly A polymerase	15	23	19	28	30	40	114	124	77	63	65	83	0.0866667	0.156667	0.48	0.326667	6.013	2.588	4.11055e-10	5.47048e-09	up	4.02	2.007	5.13354e-07	3.4167e-06	up	3.163	1.661	1.46414e-05	8.33367e-05	up	2.113	1.079	0.00448141	0.0110398	up
g21961	LG6	8225604	8230922	-	AAA ATPase domain	0	1	1	0	0	0	40	36	42	223	474	349	0.00666667	0	0.263333	2.43333	64.414	6.009	3.32381e-07	2.77481e-06	up	581.991	9.185	1.28237e-17	3.05111e-16	up	211.341	7.723	1.10788e-08	1.06715e-07	up	1903.55	10.894	5.54067e-19	7.96987e-18	up
g22000	LG6	8508018	8517392	+	Rx N-terminal domain	42	47	62	45	30	33	249	143	238	315	304	250	0.23	0.166667	0.943333	1.33333	4.492	2.167	1.79203e-10	2.5243e-09	up	6.26	2.646	5.83925e-23	2.15038e-21	up	5.736	2.52	9.06794e-14	1.64738e-12	up	7.967	2.994	1.98106e-28	5.03739e-27	up
g22029	LG6	8692692	8694219	+	--	22	48	32	27	31	35	86	79	61	95	114	112	0.836667	0.776667	1.84333	2.68	2.403	1.265	0.00338289	0.0109617	up	3.441	1.783	1.45896e-06	8.96841e-06	up	2.383	1.253	0.00110283	0.00408329	up	3.407	1.769	2.62538e-07	1.2925e-06	up
g22034	LG6	8724529	8725341	+	--	344	239	280	264	252	194	1861	2076	1346	1670	1515	1697	9.03333	7.59667	55.1867	51.7467	6.693	2.743	2.49716e-36	3.61952e-34	up	6.163	2.624	5.04362e-73	1.69817e-70	up	7.331	2.874	4.31327e-43	5.84353e-41	up	6.748	2.754	2.89086e-92	6.52232e-90	up
g22072	LG6	8995176	8995884	-	--	18	25	26	12	32	18	122	109	82	87	62	95	0.72	0.67	3.23	2.55333	4.902	2.293	2.37572e-09	2.83618e-08	up	3.801	1.926	2.70939e-07	1.88927e-06	up	4.899	2.292	1.04975e-06	7.45302e-06	up	3.796	1.925	2.22272e-05	8.36042e-05	up
g22156	LG6	9594019	9596730	+	GDSL-like Lipase/Acylhydrolase	15	25	34	31	20	77	21994	24938	17836	8860	8864	12038	0.436667	0.753333	376.77	175.053	951.452	9.894	2.1132e-292	2.8179e-288	up	435.028	8.765	0	0	up	503.089	8.975	5.83799e-51	1.12495e-48	up	229.175	7.84	3.49751e-40	1.57126e-38	up
g22254	LG6	10416143	10418031	+	GAG-pre-integrase domain	9	12	11	29	24	20	84	87	49	122	57	82	0.196667	0.453333	1.33	1.58667	7.457	2.899	5.87346e-09	6.61323e-08	up	8.743	3.128	7.21087e-12	9.4356e-11	up	2.96	1.566	0.00040431	0.00166675	up	3.466	1.793	1.23761e-05	4.8364e-05	up
g22283	LG6	10627282	10629215	-	zinc-binding in reverse transcriptase	0	0	0	0	0	0	17	55	7	73	50	50	0	0	0.54	1.18333	159.66	7.319	5.25855e-06	3.46e-05	up	339.991	8.409	3.41246e-11	4.06805e-10	up	143.972	7.17	1.09728e-05	6.39876e-05	up	306.773	8.261	1.21613e-10	8.72965e-10	up
g22284	LG6	10629690	10630649	+	--	0	0	0	0	0	0	23	20	21	29	20	30	0	0	0.49	0.61	126.521	6.983	1.51894e-06	1.11927e-05	up	154.444	7.271	8.49707e-08	6.40429e-07	up	114.25	6.836	3.94216e-06	2.5154e-05	up	139.329	7.122	3.02635e-07	1.47814e-06	up
g22315	LG6	10867793	10868884	+	Wall-associated receptor kinase galacturonan-binding	6	5	4	3	0	0	21	14	15	29	21	32	0.103333	0.02	0.33	0.556667	3.62	1.856	0.0182917	0.0462787	up	5.925	2.567	9.26052e-05	0.000400736	up	16.509	4.045	0.00250643	0.00841304	up	26.851	4.747	2.07686e-05	7.84142e-05	up
g22336	LG6	11005549	11008843	+	MULE transposase domain	0	0	0	0	0	0	6	9	4	15	22	23	0	0	0.06	0.21	37.794	5.24	0.00832265	0.0238998	up	119.273	6.898	1.13207e-06	7.05809e-06	up	34.113	5.092	0.01324	0.0354464	up	107.641	6.75	3.60182e-06	1.5217e-05	up
g22339	LG6	11016913	11024034	-	GRAM domain	10	14	3	24	22	51	176	139	119	240	214	271	0.0533333	0.196667	0.863333	1.47	17.578	4.136	7.15664e-19	2.83748e-17	up	29.335	4.875	1.05047e-38	1.01665e-36	up	4.386	2.133	1.46452e-07	1.19667e-06	up	7.335	2.875	2.59967e-19	3.83675e-18	up
g22385	LG6	11366664	11372838	-	Leucine rich repeat	97	100	68	5	2	2	1401	210	1294	484	464	490	0.573333	0.0166667	6.23333	3.17667	11.798	3.56	1.17961e-06	8.87036e-06	up	5.942	2.571	1.98433e-42	2.29124e-40	up	314.098	8.295	1.01026e-17	2.7262e-16	up	157.318	7.298	1.4231e-45	7.89609e-44	up
g224	LG1	1196910	1197539	+	Domain of unknown function (DUF4228)	18	17	33	31	19	25	186	125	129	51	78	97	0.81	0.89	5.09333	2.69	6.908	2.788	2.71501e-12	4.97544e-11	up	3.591	1.844	6.42842e-05	0.00028676	up	5.745	2.522	3.76738e-13	6.41004e-12	up	2.985	1.578	0.000248139	0.000785157	up
g2269	LG1	15615714	15626644	-	FAM91 C-terminus	27	37	11	19	27	25	81	82	66	84	75	88	0.136667	0.133333	0.423333	0.463333	3.378	1.756	0.000283183	0.00125152	up	3.624	1.858	1.25675e-05	6.47557e-05	up	3.169	1.664	4.73182e-05	0.000241054	up	3.403	1.767	3.11942e-06	1.32778e-05	up
g22721	LG6	13917711	13926069	+	NB-ARC domain	6	6	5	2	5	2	66	15	63	37	31	37	0.03	0.0166667	0.233333	0.173333	9.121	3.189	1.78062e-05	0.000104433	up	6.718	2.748	3.36824e-06	1.93985e-05	up	15.414	3.946	6.12593e-06	3.76891e-05	up	11.365	3.507	2.96637e-06	1.26633e-05	up
g22854	LG6	14933826	14934927	+	--	0	12	0	0	0	0	139	168	114	76	62	62	0.103333	0	3.72	1.78667	39.177	5.292	0.00323178	0.010542	up	18.486	4.208	0.0186233	0.0443679	up	754.631	9.56	1.39056e-14	2.76128e-13	up	355.771	8.475	2.14583e-11	1.65776e-10	up
g22941	LG6	15541713	15550734	-	Reverse transcriptase (RNA-dependent DNA polymerase)	31	31	34	20	33	29	78	77	96	64	52	78	0.14	0.12	0.36	0.283333	2.867	1.52	5.25626e-05	0.000278254	up	2.181	1.125	0.00168878	0.00545021	up	3.024	1.596	0.000139069	0.000640859	up	2.299	1.201	0.00360036	0.00905903	up
g23245	LG6	17658745	17664071	-	Zinc knuckle	16	2	9	15	26	6	35	104	31	133	63	72	0.0466667	0.08	0.29	0.446667	7.073	2.822	0.000460999	0.00193139	up	10.714	3.421	2.14779e-09	2.04553e-08	up	3.606	1.85	0.0135036	0.0360304	up	5.486	2.456	3.50168e-06	1.48185e-05	up
g23481	LG6	19311592	19315554	+	Xyloglucan endo-transglycosylase (XET) C-terminus	76	86	66	196	303	329	1169	1767	1201	457	904	1386	1.42	5.32	26.1167	17.4767	20.097	4.329	6.81897e-63	3.40991e-60	up	13.184	3.721	5.34413e-30	3.24429e-28	up	4.96	2.31	1.87308e-17	4.93705e-16	up	3.254	1.702	0.000804798	0.00231709	up
g23506	LG6	19534104	19538686	+	Leucine Rich repeats (2 copies)	14	25	34	65	34	49	139	144	99	146	131	112	0.293333	0.593333	1.50667	1.56667	5.631	2.493	8.22803e-09	9.02805e-08	up	5.757	2.525	5.23396e-11	6.11219e-10	up	2.555	1.354	0.000142449	0.000654609	up	2.605	1.381	2.12595e-05	8.01936e-05	up
g2370	LG1	16377145	16381345	-	Negative regulator of sigma F	61	73	54	34	65	69	396	149	171	176	118	121	0.913333	0.843333	3.39333	2.04333	4.031	2.011	7.09975e-08	6.6657e-07	up	2.398	1.262	6.66285e-06	3.63162e-05	up	4.045	2.016	2.18051e-06	1.45789e-05	up	2.404	1.265	0.000253854	0.000802122	up
g23749	LG6	21303769	21308535	-	Protein tyrosine kinase	78	108	91	84	122	105	317	270	165	304	213	323	1.08667	1.25667	2.92	3.31667	2.925	1.548	2.49036e-07	2.1256e-06	up	3.268	1.708	6.51671e-14	1.07495e-12	up	2.347	1.231	5.61749e-05	0.000281655	up	2.619	1.389	3.87699e-09	2.36341e-08	up
g23781	LG6	21652479	21654912	+	--	0	0	0	4	1	0	19	42	10	37	48	52	0	0.0333333	0.483333	0.936667	142.297	7.153	3.52252e-06	2.40654e-05	up	271.696	8.086	3.72639e-10	3.91467e-09	up	14.311	3.839	0.00123469	0.00451175	up	27.196	4.765	3.72724e-08	2.03652e-07	up
g23801	LG6	21771161	21778646	-	Uncharacterised protein family (UPF0227)	65	102	76	114	133	102	313	183	261	434	288	386	0.766667	1.13333	2.37667	3.52667	3.367	1.751	3.0275e-09	3.55802e-08	up	4.921	2.299	1.70604e-23	6.61082e-22	up	2.114	1.08	5.52863e-05	0.000277656	up	3.086	1.626	4.4786e-15	4.77401e-14	up
g23851	LG6	22183590	22186060	+	Orsellinic acid/F9775 biosynthesis cluster protein D	5	6	13	5	3	3	32	17	26	38	23	16	0.0866667	0.0366667	0.263333	0.273333	3.318	1.73	0.0176127	0.0449215	up	3.43	1.778	0.011328	0.0289611	up	6.673	2.738	0.000641574	0.00251197	up	6.881	2.783	0.000506682	0.00151674	up
g23879	LG6	22395770	22397818	+	Rx N-terminal domain	4	0	8	0	2	3	24	43	22	123	70	29	0.0966667	0.04	0.693333	1.73333	8.03	3.005	0.00179816	0.00634912	up	19.807	4.308	3.11723e-08	2.51102e-07	up	17.677	4.144	4.38004e-05	0.000224574	up	43.493	5.443	5.65225e-10	3.77159e-09	up
g23889	LG6	22487313	22497466	-	ATPase family associated with various cellular activities (AAA)	2	0	2	16	18	18	169	4	99	1413	1218	1234	0.00666667	0.0666667	0.313333	4.69333	70.598	6.142	3.94042e-07	3.23822e-06	up	1053.17	10.041	1.61099e-42	1.88735e-40	up	4.931	2.302	0.00989176	0.0276108	up	73.031	6.19	6.8675e-149	3.7393e-146	up
g24062	LG6	23882592	23884089	+	Pyridoxal-dependent decarboxylase, C-terminal sheet domain	184	171	135	101	117	77	714	422	484	582	408	277	2.39667	1.49	7.86667	6.31667	3.575	1.838	1.33205e-17	4.57412e-16	up	2.832	1.502	2.06759e-08	1.71339e-07	up	5.325	2.413	7.30652e-22	2.86877e-20	up	4.213	2.075	3.22797e-13	2.93587e-12	up
g24084	LG6	24043413	24049787	-	Multicopper oxidase	230	304	198	38	28	68	514	695	316	777	942	834	2.42667	0.453333	5.07667	8.68333	2.289	1.194	0.000128168	0.000619398	up	3.844	1.943	7.75568e-23	2.84306e-21	up	11.288	3.497	9.66712e-20	3.13254e-18	up	18.939	4.243	4.72618e-62	4.47803e-60	up
g24235	LG6	25024195	25026881	+	Ribonuclease T2 family	7	4	0	8	5	8	43	56	41	46	45	44	0.0833333	0.173333	1.14	1.11	14.288	3.837	9.54173e-07	7.31259e-06	up	13.619	3.768	7.04207e-08	5.37949e-07	up	6.638	2.731	4.83502e-06	3.03105e-05	up	6.35	2.667	2.80859e-06	1.20503e-05	up
g24300	LG6	25565726	25577098	-	HAD-hyrolase-like	1576	1916	655	197	584	165	4448	6278	5871	1977	3485	2718	19.2033	4.64667	79.1633	39.6567	4.51	2.173	2.63752e-11	4.18706e-10	up	2.223	1.153	0.0156849	0.038383	up	17.222	4.106	1.20766e-10	1.52427e-09	up	8.504	3.088	3.35129e-06	1.42041e-05	up
g24315	LG6	25689873	25690464	+	Peptidase inhibitor I78 family	13	19	3	3	18	18	47	62	85	96	74	95	0.5	0.593333	2.91	3.93667	6.274	2.649	4.03835e-05	0.000219563	up	8.312	3.055	4.60611e-10	4.78612e-09	up	4.94	2.305	0.00070883	0.00274536	up	6.584	2.719	1.91585e-07	9.60558e-07	up
g24461	LG6	26590348	26592856	+	Protein kinase domain	12	13	2	6	2	1	25	58	20	58	57	37	0.126667	0.0433333	0.503333	0.746667	4.326	2.113	0.00936481	0.0264184	up	6.288	2.653	1.19289e-05	6.18007e-05	up	11.558	3.531	0.00013872	0.000639471	up	16.829	4.073	2.464e-08	1.37336e-07	up
g24464	LG6	26599798	26606848	+	Protein-kinase domain of FAM69	0	0	0	0	0	0	11	2	8	3	4	8	0	0	0.0566667	0.04	40.442	5.338	0.00824099	0.0236976	up	29.383	4.877	0.0137033	0.0341767	up	36.562	5.192	0.0128072	0.0344408	up	26.507	4.728	0.0236484	0.0485169	up
g24488	LG6	26752560	26754465	+	Ferritin-like domain	10	0	3	16	39	61	230	68	79	64	89	100	0.08	0.736667	2.24667	1.59667	30.683	4.939	2.09517e-10	2.91539e-09	up	21.509	4.427	8.09421e-12	1.0533e-10	up	3.057	1.612	0.00618203	0.0184466	up	2.146	1.101	0.0208075	0.0434126	up
g24556	LG6	27217370	27218781	+	Peroxidase	0	0	0	4	30	6	106	145	31	58	60	39	0	0.253333	1.69	0.97	555.291	9.117	1.63623e-11	2.68708e-10	up	312.843	8.289	1.13082e-10	1.26595e-09	up	6.75	2.755	0.000703397	0.00272616	up	3.814	1.931	0.00589728	0.0141099	up
g24559	LG6	27228700	27230125	+	Peroxidase	0	0	0	0	4	3	10	42	7	34	5	12	0	0.0433333	0.356667	0.3	120.114	6.908	3.42341e-05	0.00018867	up	97.288	6.604	2.81268e-05	0.000134594	up	8.413	3.073	0.013855	0.0367943	up	6.836	2.773	0.0160414	0.0343857	up
g24635	LG6	27747895	27748904	-	--	40	52	61	50	39	37	368	450	280	66	58	170	1.69667	1.40667	12.0633	3.22667	7.804	2.964	1.401e-21	7.25997e-20	up	2.039	1.028	0.0207708	0.0487873	up	8.627	3.109	3.74617e-26	2.00952e-24	up	2.255	1.173	0.0076147	0.0177095	up
g24664	LG6	27947233	27947746	-	--	1	0	0	0	0	0	45	74	18	20	27	19	0.0133333	0	1.96	0.97	139.599	7.125	3.60017e-07	2.98435e-06	up	67.768	6.083	1.08681e-05	5.68402e-05	up	245.401	7.939	2.74492e-08	2.49964e-07	up	119.159	6.897	1.50958e-06	6.71389e-06	up
g2468	LG1	17184114	17189924	+	Helix-loop-helix DNA-binding domain	4	17	10	0	2	0	38	62	23	30	52	89	0.183333	0.0133333	0.72	1.01333	4.34	2.118	0.00329067	0.0107053	up	5.975	2.579	3.76729e-05	0.000176193	up	60.453	5.918	2.91875e-06	1.90716e-05	up	83.393	6.382	6.30796e-08	3.34978e-07	up
g24684	LG6	28063162	28065396	+	Myb-like DNA-binding domain	154	90	84	120	73	68	171	306	123	212	275	469	2.16333	1.76333	4.01	6.42	2.037	1.027	0.0130533	0.034977	up	3.187	1.672	2.03832e-07	1.45216e-06	up	2.301	1.202	0.00392669	0.0124071	up	3.599	1.848	4.80489e-09	2.90091e-08	up
g24724	LG6	28320428	28322995	-	NAD dependent epimerase/dehydratase family	0	0	0	2	1	2	17	35	54	16	18	68	0	0.0333333	0.716667	0.663333	216.551	7.759	6.74596e-08	6.35591e-07	up	196.961	7.622	8.85212e-08	6.65312e-07	up	21.623	4.435	6.68007e-06	4.08512e-05	up	19.678	4.299	1.33516e-05	5.18879e-05	up
g24798	LG6	28835157	28841012	+	--	7	0	3	0	0	6	52	74	56	23	18	13	0.0366667	0.0233333	0.67	0.2	20.222	4.338	1.2615e-08	1.34756e-07	up	5.939	2.57	0.00738263	0.0199816	up	30.348	4.924	1.6254e-07	1.31916e-06	up	8.914	3.156	0.00764153	0.0177648	up
g24837	LG6	29035400	29037020	+	UDP-glucoronosyl and UDP-glucosyl transferase	626	597	404	200	289	373	2136	1625	1083	2011	2655	3547	8.05667	4.41	23.83	41.6167	3.227	1.69	1.99703e-13	4.19817e-12	up	5.546	2.472	9.55976e-33	6.88905e-31	up	5.443	2.445	4.39791e-20	1.47945e-18	up	9.349	3.225	3.41009e-21	5.64941e-20	up
g24879	LG6	29277029	29278677	+	Plant protein of unknown function	27	24	22	27	11	25	85	129	51	64	49	63	0.366667	0.32	1.33667	0.896667	3.991	1.997	2.76371e-05	0.000155349	up	2.617	1.388	0.000231761	0.000918765	up	4.199	2.07	0.000118603	0.000554905	up	2.749	1.459	0.00153685	0.00418347	up
g24894	LG6	29386829	29389386	+	Response regulator receiver domain	71	74	59	42	38	62	258	280	221	319	359	492	1.04	0.74	3.88667	6.06333	4.081	2.029	6.30632e-16	1.78798e-14	up	6.253	2.644	1.13348e-29	6.7784e-28	up	5.288	2.403	3.49638e-16	8.1978e-15	up	8.096	3.017	1.97663e-30	5.52118e-29	up
g24923	LG6	29551395	29554749	+	--	1	0	0	2	4	1	1894	2288	2395	856	803	998	0.00333333	0.0266667	26.3833	10.6833	6758.61	12.723	2.39651e-26	1.80891e-24	up	2686.29	11.391	8.72275e-22	2.92709e-20	up	936.177	9.871	1.5139e-64	4.55261e-62	up	372.153	8.54	1.34731e-51	9.04934e-50	up
g24960	LG6	29737971	29739675	+	Leucine Rich repeat	1719	1358	707	639	844	458	5461	6377	4379	4912	5395	8628	21.9833	11.7733	95.7233	112.813	4.768	2.253	1.47804e-16	4.50336e-15	up	5.507	2.461	1.04022e-10	1.17041e-09	up	8.21	3.037	1.00751e-36	9.70704e-35	up	9.484	3.246	2.43135e-19	3.60134e-18	up
g24990	LG6	29931326	29933388	+	Peroxidase	12	5	10	5	12	17	83	234	39	41	38	55	0.153333	0.196667	2.05	0.773333	14.658	3.874	5.52098e-08	5.27381e-07	up	5.376	2.427	6.54957e-06	3.57328e-05	up	10.455	3.386	3.17434e-06	2.05925e-05	up	3.839	1.941	0.000746133	0.00216159	up
g25051	LG6	30309495	30316929	+	UDP-glucoronosyl and UDP-glucosyl transferase	7	20	10	10	3	15	15336	21480	16874	8215	7685	10080	0.103333	0.08	150.493	73.0067	1604.6	10.648	2.2181e-224	9.8596e-221	up	763.122	9.576	4.3184e-279	2.8838e-275	up	1925.88	10.911	1.88472e-92	1.15098e-89	up	909.886	9.83	5.4067e-249	9.5997e-246	up
g25053	LG6	30325541	30326650	-	SH3-binding, glutamic acid-rich protein	2	3	2	0	0	0	8	29	10	39	6	8	0.0466667	0	0.316667	0.346667	7.546	2.916	0.00623645	0.018659	up	8.007	3.001	0.00442606	0.0127555	up	86.282	6.431	0.000144611	0.000663545	up	91.41	6.514	5.89325e-05	0.000206772	up
g25128	LG6	30804777	30809022	-	Calcineurin-like phosphoesterase superfamily domain	125	67	83	54	46	70	352	377	186	432	301	320	1.36333	0.86	4.51667	5.28333	3.629	1.86	8.02539e-08	7.46294e-07	up	4.167	2.059	4.20225e-16	8.60355e-15	up	5.288	2.403	7.62904e-13	1.25449e-11	up	6.068	2.601	2.80375e-27	6.64521e-26	up
g25216	LG6	31313648	31315476	-	Eukaryotic-type carbonic anhydrase	75	48	37	18	35	20	424	919	299	243	153	155	1.22333	0.583333	12.7967	4.29	11.502	3.524	8.95721e-16	2.49884e-14	up	3.762	1.912	1.29242e-09	1.26796e-08	up	22.319	4.48	4.9217e-22	1.96152e-20	up	7.329	2.874	1.25826e-15	1.40392e-14	up
g25267	LG7	1	4671	-	--	275	249	263	219	153	183	628	968	388	600	580	661	4.03	2.88667	10.16	9.54	2.766	1.468	5.08442e-06	3.35647e-05	up	2.546	1.348	1.79303e-20	5.46738e-19	up	3.556	1.83	1.77171e-08	1.65556e-07	up	3.268	1.709	1.94483e-25	4.18226e-24	up
g25276	LG7	82526	86373	+	AP2 domain	16	8	26	16	26	20	98	287	101	96	75	43	0.243333	0.3	2.33	1.02333	10.715	3.422	1.62556e-08	1.70692e-07	up	4.622	2.209	3.80908e-05	0.000177919	up	7.865	2.975	5.45899e-08	4.76147e-07	up	3.393	1.763	0.000205992	0.000660965	up
g25292	LG7	205761	209170	-	FAR1 DNA-binding domain	2	3	5	82	66	52	325	181	266	282	170	171	0.0366667	0.75	2.81667	2.30667	83.166	6.378	6.86818e-31	7.00923e-29	up	67.232	6.071	9.46617e-29	5.26779e-27	up	3.772	1.915	1.89507e-10	2.33111e-09	up	3.044	1.606	3.99685e-08	2.17249e-07	up
g25437	LG7	998258	999251	+	--	46	57	21	76	39	43	261	222	225	207	159	218	1.02667	1.34667	5.94	4.95	6.292	2.653	8.69457e-15	2.17256e-13	up	5.15	2.365	1.87762e-13	2.92385e-12	up	4.434	2.149	2.61102e-12	4.04388e-11	up	3.627	1.859	3.42841e-10	2.33967e-09	up
g25445	LG7	1044526	1045313	-	RING/Ubox like zinc-binding domain	15	11	8	14	2	0	93	46	100	39	43	41	0.313333	0.15	2.22667	1.17	7.693	2.943	1.79296e-08	1.86644e-07	up	3.983	1.994	7.90318e-05	0.000346603	up	14.915	3.899	1.11548e-05	6.49479e-05	up	7.714	2.947	0.000570586	0.00168946	up
g25494	LG7	1320863	1323678	-	RING-type zinc-finger	63	34	39	25	69	38	115	134	77	154	114	99	0.44	0.44	1.05	1.19667	2.631	1.396	0.000417218	0.00176735	up	2.951	1.561	4.29966e-06	2.42572e-05	up	2.404	1.265	0.00811813	0.0232839	up	2.7	1.433	0.000461431	0.001392	up
g25524	LG7	1532583	1536800	-	Anthranilate synthase component I, N terminal region	237	132	38	4	4	0	875	1364	1360	619	278	566	1.33333	0.0266667	12.31	4.91	10.125	3.34	1.612e-06	1.18305e-05	up	3.94	1.978	0.0044463	0.0128055	up	451.599	8.819	7.45867e-52	1.51057e-49	up	176.067	7.46	2.87126e-38	1.1667e-36	up
g25528	LG7	1568855	1570978	+	Hs1pro-1 N-terminus	1137	706	688	735	500	540	1967	2180	1180	1938	1553	1282	10.1533	7.28333	21.39	19.5367	2.309	1.207	3.94169e-06	2.66679e-05	up	2.072	1.051	3.43558e-07	2.35385e-06	up	2.962	1.566	2.56903e-11	3.52497e-10	up	2.656	1.409	4.46451e-16	5.15603e-15	up
g25533	LG7	1588496	1590170	-	Transferase family	28	43	61	37	89	29	311	204	321	217	186	150	0.683333	0.823333	4.25333	2.86333	6.809	2.767	4.7789e-14	1.09059e-12	up	4.521	2.177	3.42441e-10	3.61448e-09	up	5.233	2.388	5.75145e-08	4.99134e-07	up	3.474	1.796	8.71371e-06	3.48933e-05	up
g25561	LG7	1757277	1759918	-	non-haem dioxygenase in morphine synthesis N-terminal	0	0	0	6	6	5	186	76	88	64	36	32	0	0.09	1.79667	0.7	672.295	9.393	1.60737e-13	3.4113e-12	up	258.772	8.016	9.61804e-10	9.56243e-09	up	19.731	4.302	2.17487e-14	4.22573e-13	up	7.578	2.922	3.5286e-06	1.49216e-05	up
g25644	LG7	2305751	2311153	+	2-oxoglutarate dehydrogenase N-terminus	61	50	64	44	69	74	212	232	199	227	215	262	0.373333	0.41	1.37	1.51667	4.016	2.006	3.73686e-13	7.61943e-12	up	4.365	2.126	2.296e-19	6.30527e-18	up	3.389	1.761	1.00659e-08	9.79091e-08	up	3.681	1.88	1.67755e-12	1.4349e-11	up
g25720	LG7	2791633	2794117	-	Plants and Prokaryotes Conserved (PCC) domain	183	141	145	297	220	317	905	673	837	712	700	845	2.94333	5.33667	15.1433	14.3733	5.617	2.49	2.53429e-40	4.44667e-38	up	5.247	2.391	5.99192e-49	8.60496e-47	up	2.856	1.514	2.64688e-16	6.28773e-15	up	2.665	1.414	8.11622e-19	1.15525e-17	up
g25751	LG7	2933755	2934926	+	AN1-like Zinc finger	189	165	108	54	88	116	961	1184	770	572	465	611	3.22667	1.86667	20.58	11.7267	6.978	2.803	5.70494e-29	5.12867e-27	up	3.895	1.962	2.01409e-24	8.47672e-23	up	11.143	3.478	3.608e-32	2.78096e-30	up	6.227	2.638	7.34422e-28	1.80781e-26	up
g25932	LG7	4215247	4215919	+	Arabinogalactan peptide	38	24	19	22	27	56	177	170	158	83	82	78	0.996667	1.33333	6.27333	3.07	6.864	2.779	2.01651e-16	6.00227e-15	up	3.302	1.724	3.98383e-06	2.25931e-05	up	4.746	2.247	1.84944e-08	1.72413e-07	up	2.282	1.19	0.0051146	0.012411	up
g26078	LG7	5293970	5298398	-	Domain of unknown function (DUF4219)	161	88	84	135	109	109	545	615	511	807	442	462	0.726667	0.793333	3.69	3.78333	5.555	2.474	2.9595e-19	1.22435e-17	up	5.593	2.484	1.38045e-18	3.54782e-17	up	4.694	2.231	2.66222e-27	1.52933e-25	up	4.727	2.241	6.31421e-22	1.09445e-20	up
g261	LG1	1351050	1355146	+	Phosphotransferase enzyme family	144	116	62	97	179	83	280	593	318	335	247	241	0.863333	1.01	3.28667	2.26667	4.177	2.062	1.89519e-07	1.64928e-06	up	2.812	1.491	1.26811e-07	9.29551e-07	up	3.298	1.722	3.12614e-05	0.000165965	up	2.227	1.155	0.000154162	0.000504407	up
g26104	LG7	5515922	5519616	+	Domain of unknown function (DUF3403)	91	78	70	19	15	5	267	137	362	207	192	191	0.63	0.106667	2.03	1.58	3.518	1.815	1.39947e-06	1.0387e-05	up	2.699	1.432	1.62905e-10	1.79227e-09	up	19.416	4.279	6.58791e-17	1.65616e-15	up	14.893	3.897	1.06914e-24	2.20285e-23	up
g26165	LG7	5979014	5996297	+	Anaphase-promoting complex subunit 4 WD40 domain	72	60	48	71	55	52	194	231	142	310	213	371	0.286667	0.29	0.903333	1.43333	3.464	1.792	1.03834e-08	1.12176e-07	up	5.371	2.425	1.59846e-22	5.71836e-21	up	3.151	1.656	1.41928e-07	1.16329e-06	up	4.885	2.288	8.82155e-20	1.3412e-18	up
g26173	LG7	6033594	6036897	+	Secreted protein acidic and rich in cysteine Ca binding region	85	37	40	5	4	5	410	267	194	149	80	87	1.27333	0.113333	6.78	2.51667	5.815	2.54	1.57552e-11	2.59164e-10	up	2.125	1.088	0.00630375	0.0173721	up	60.243	5.913	2.37473e-32	1.83752e-30	up	21.991	4.459	2.69963e-16	3.17343e-15	up
g26299	LG7	7051704	7053114	+	Prephenate dehydrogenase	80	68	54	14	88	19	214	270	194	446	456	249	1.12333	0.71	3.81	6.59333	3.706	1.89	5.54612e-11	8.37887e-10	up	6.317	2.659	3.79312e-19	1.02619e-17	up	5.423	2.439	6.52806e-05	0.000322503	up	9.248	3.209	0.000215742	0.000689486	up
g26478	LG7	8548129	8550325	+	--	457	585	502	445	414	518	1827	1387	1534	1127	938	1031	9.3	8.45667	28.45	18.8567	3.336	1.738	1.23931e-27	1.0286e-25	up	2.177	1.122	1.83732e-15	3.50219e-14	up	3.386	1.76	1.50248e-37	1.51373e-35	up	2.207	1.142	5.58299e-20	8.57115e-19	up
g26497	LG7	8693254	8695513	-	FNIP Repeat	32	34	33	21	24	25	123	144	106	82	68	44	0.38	0.273333	1.43333	0.753333	4.125	2.044	1.52546e-09	1.87542e-08	up	2.142	1.099	0.00574118	0.0160078	up	5.265	2.396	6.36716e-11	8.31943e-10	up	2.733	1.451	0.00100542	0.00283689	up
g26510	LG7	8773808	8778644	-	Leucine Rich repeats (2 copies)	21	17	11	21	25	6	799	675	785	470	367	530	0.163333	0.18	7.57333	4.61667	50.568	5.66	3.48947e-90	3.24642e-87	up	30.283	4.92	2.42676e-69	7.14949e-67	up	42.726	5.417	4.71175e-60	1.22244e-57	up	25.579	4.677	3.03177e-50	1.94974e-48	up
g26511	LG7	8779389	8781937	+	--	0	0	0	0	0	0	1	26	20	16	14	16	0	0	0.37	0.35	98.148	6.617	0.000391479	0.00167141	up	90.608	6.502	9.38808e-06	4.96702e-05	up	88.434	6.467	0.000678328	0.00263879	up	81.757	6.353	2.94513e-05	0.000108596	up
g26527	LG7	8909781	8911244	-	GrpE	102	88	73	55	31	62	238	209	260	191	116	196	1.55667	0.89	4.20667	2.99	2.957	1.564	4.37679e-10	5.79972e-09	up	2.066	1.047	4.54278e-05	0.000209021	up	4.749	2.248	1.18241e-12	1.90178e-11	up	3.313	1.728	7.00109e-08	3.69766e-07	up
g26528	LG7	8911379	8913610	+	--	181	182	150	115	93	97	428	328	501	428	244	277	2.42	1.47	5.97667	4.52	2.69	1.428	1.31187e-09	1.62784e-08	up	2.002	1.001	8.17259e-06	4.38062e-05	up	4.081	2.029	2.16308e-16	5.18499e-15	up	3.035	1.602	2.42328e-11	1.86224e-10	up
g26851	LG7	11683264	11684755	+	--	0	0	0	1	2	6	46	53	27	13	40	25	0	0.0733333	1.03333	0.666667	248.705	7.958	3.94128e-09	4.56488e-08	up	158.516	7.308	2.69099e-07	1.87708e-06	up	13.771	3.784	3.98795e-06	2.54259e-05	up	8.771	3.133	0.000602513	0.00177575	up
g26948	LG7	12527568	12529183	-	Protein phosphatase 2C	55	61	56	77	77	64	699	407	465	315	210	175	1.14667	1.48	10.31	4.70667	9.823	3.296	9.66327e-42	1.85855e-39	up	4.419	2.144	4.78722e-14	7.99539e-13	up	6.999	2.807	6.59285e-32	4.96591e-30	up	3.145	1.653	3.64693e-09	2.23049e-08	up
g27001	LG7	13066238	13069243	-	--	0	0	0	0	0	0	1	37	5	54	12	29	0	0	0.203333	0.43	89.629	6.486	0.00113737	0.00425835	up	182.036	7.508	9.07973e-08	6.80377e-07	up	80.718	6.335	0.00181586	0.00632842	up	164.212	7.359	2.2975e-07	1.14015e-06	up
g27115	LG7	13928989	13929541	-	--	0	1	4	8	11	24	41	188	40	113	167	182	0.07	0.586667	3.66333	6.28	59.309	5.89	8.28659e-09	9.07984e-08	up	100.769	6.655	1.21101e-19	3.41222e-18	up	6.358	2.669	0.000431644	0.00176969	up	10.634	3.411	3.61895e-15	3.89323e-14	up
g27129	LG7	14020933	14025261	-	Lytic transglycolase	6	0	0	5	24	77	138	174	83	124	217	431	0.0233333	0.45	1.62667	3.22333	72.989	6.19	9.74922e-15	2.42247e-13	up	144.259	7.173	1.79564e-06	1.0863e-05	up	3.668	1.875	0.0105106	0.0290988	up	7.106	2.829	0.00698554	0.0163919	up
g27132	LG7	14050881	14052691	-	Late embryogenesis abundant protein	113	55	19	32	47	33	905	1439	1042	212	293	458	2.06333	1.30333	38.74	11.0367	20.586	4.364	3.20808e-22	1.75807e-20	up	5.738	2.521	3.7915e-08	3.01836e-07	up	30.102	4.912	4.95114e-62	1.39387e-59	up	8.399	3.07	5.60627e-21	9.15407e-20	up
g27347	LG7	15648743	15650827	+	--	25	12	40	56	24	35	142	72	119	124	116	74	0.426667	0.626667	1.78	1.72667	4.598	2.201	1.55727e-05	9.24861e-05	up	4.414	2.142	5.04291e-06	2.80709e-05	up	2.848	1.51	0.00045577	0.00185804	up	2.725	1.446	0.000333869	0.00102993	up
g27524	LG7	16948381	16953018	-	--	40	36	30	76	72	92	190	130	203	296	267	290	0.446667	1.03667	2.21	3.65667	5.4	2.433	7.4759e-14	1.66615e-12	up	8.782	3.135	3.37387e-40	3.48404e-38	up	2.148	1.103	0.000186786	0.000835246	up	3.493	1.804	2.29882e-17	2.92451e-16	up
g27661	LG7	17908069	17908774	-	Leucine Rich Repeat	0	0	0	0	0	0	14	8	38	30	18	18	0	0	0.643333	0.693333	121.259	6.922	1.67249e-05	9.86843e-05	up	129.395	7.016	5.41618e-07	3.58894e-06	up	109.454	6.774	3.53318e-05	0.000185221	up	116.747	6.867	1.76381e-06	7.77426e-06	up
g27791	LG7	18751677	18754991	-	--	0	0	0	0	0	0	8	15	2	18	15	12	0	0	0.15	0.273333	49.665	5.634	0.00410834	0.0129893	up	89.015	6.476	1.23532e-05	6.37748e-05	up	44.819	5.486	0.00662249	0.0195784	up	80.33	6.328	3.70351e-05	0.000134412	up
g27928	LG7	19739189	19746498	-	Lanthionine synthetase C-like protein	17	8	0	1	0	0	92	8	74	82	63	94	0.0966667	0.00333333	0.69	0.976667	7.647	2.935	0.00570349	0.0172907	up	10.594	3.405	1.15824e-07	8.54489e-07	up	155.333	7.279	9.6103e-07	6.85623e-06	up	216.755	7.76	5.62892e-10	3.75725e-09	up
g28050	LG7	20638389	20641818	-	--	0	0	0	0	0	0	14	34	26	21	24	31	0	0	0.536667	0.546667	150.302	7.232	9.61808e-07	7.36545e-06	up	149.956	7.228	1.23425e-07	9.06388e-07	up	135.58	7.083	2.34558e-06	1.56064e-05	up	135.308	7.08	4.26044e-07	2.03847e-06	up
g28179	LG7	21544711	21549765	-	DASH complex subunit Dam1	2	1	2	1	0	2	89	4	70	101	73	97	0.03	0.02	0.963333	1.64667	34.417	5.105	5.63153e-06	3.6818e-05	up	58.638	5.874	1.37884e-15	2.65477e-14	up	52.369	5.711	1.07597e-05	6.28838e-05	up	88.304	6.464	2.24072e-12	1.89176e-11	up
g28285	LG7	22189717	22192785	+	Cytoskeletal-regulatory complex EF hand	1	9	1	8	11	23	149	149	282	68	81	114	0.0633333	0.253333	3.48	1.57667	58.938	5.881	2.23796e-18	8.30517e-17	up	26.163	4.709	4.06844e-13	6.10525e-12	up	13.841	3.791	5.45615e-14	1.01443e-12	up	6.145	2.619	6.00185e-08	3.19637e-07	up
g28746	LG7	25383622	25386264	+	Multicopper oxidase	27	1	11	15	61	14	71	184	45	162	78	46	0.15	0.36	1.16667	1.11	8.661	3.115	0.000222137	0.00101041	up	8.015	3.003	3.16955e-05	0.000150094	up	3.274	1.711	0.0197013	0.0495153	up	3.043	1.606	0.00890445	0.0203464	up
g28829	LG7	26014847	26018467	+	Domain of unknown function (DUF966)	97	158	105	226	211	230	1815	428	1417	1911	1520	1898	1.11667	2.12	11.2033	16.7633	10.848	3.439	7.961e-17	2.49984e-15	up	16.058	4.005	7.0448e-118	7.8407e-115	up	5.292	2.404	2.35491e-10	2.85516e-09	up	7.817	2.967	2.3686e-153	1.4437e-150	up
g2896	LG1	20345842	20353891	+	Early Flowering 4 domain	55	50	43	16	12	8	219	151	149	213	203	208	0.806667	0.2	2.80667	3.46	3.799	1.926	5.26113e-12	9.20698e-11	up	4.608	2.204	2.81203e-20	8.42704e-19	up	14.082	3.816	4.08688e-22	1.64365e-20	up	17.071	4.093	2.90521e-31	8.50467e-30	up
g29201	LG7	28738507	28740826	+	Glutamine amidotransferase class-I	93	33	22	47	54	46	312	245	284	368	183	435	0.606667	0.626667	3.50333	4.10333	6.324	2.661	2.81971e-09	3.32652e-08	up	7.249	2.858	3.10998e-11	3.73412e-10	up	5.618	2.49	2.76042e-23	1.2028e-21	up	6.446	2.688	1.43917e-19	2.15754e-18	up
g29398	LG7	30184882	30186832	+	non-haem dioxygenase in morphine synthesis N-terminal	1145	1148	2642	791	857	1382	115670	108959	99297	57908	57220	81086	30.0367	18.3933	1923.87	1179.25	70.009	6.129	5.86129e-35	7.71318e-33	up	42.179	5.398	6.1742e-26	2.92413e-24	up	105.397	6.72	1.5272e-252	1.0103e-248	up	63.413	5.987	4.58322e-90	9.69767e-88	up
g29481	LG7	30647756	30653839	+	Polysaccharide biosynthesis C-terminal domain	1003	1281	780	1196	1512	1027	2099	2401	3593	2347	3641	4834	9.66	12.1733	26.0933	34.95	2.95	1.561	7.78835e-09	8.59037e-08	up	3.882	1.957	1.69707e-16	3.63617e-15	up	2.161	1.112	1.99807e-05	0.000110495	up	2.845	1.508	1.12302e-05	4.41888e-05	up
g29515	LG7	30858289	30859133	-	Dirigent-like protein	2497	1533	1716	1550	2156	1171	10752	12382	9412	2687	4230	3865	49.9533	43.74	284.327	96.2767	6.239	2.641	1.17579e-37	1.80913e-35	up	2.079	1.056	1.43356e-06	8.82391e-06	up	6.56	2.714	8.05233e-32	6.01953e-30	up	2.186	1.129	0.00265467	0.00686261	up
g29519	LG7	30872768	30877063	+	Integrase core domain	10	2	2	4	0	0	31	24	22	178	108	166	0.0233333	0.00666667	0.143333	0.86	6.067	2.601	0.00197915	0.00689384	up	35.025	5.13	3.34705e-23	1.25803e-21	up	19.119	4.257	0.000259148	0.00111692	up	110.101	6.783	1.97024e-17	2.51985e-16	up
g29520	LG7	30877189	30880433	-	Protein kinase domain	29	18	16	53	80	126	358	304	341	493	300	433	0.303333	1.29	4.87667	5.99	17.465	4.126	1.58366e-43	3.38792e-41	up	21.055	4.396	3.22016e-54	5.6838e-52	up	3.809	1.93	2.83343e-09	2.98892e-08	up	4.591	2.199	1.14969e-14	1.18262e-13	up
g29560	LG7	31102739	31105250	-	Intermediate filament protein	32	24	41	0	11	14	174	102	83	113	97	83	0.393333	0.103333	1.42333	1.20333	3.927	1.973	1.43033e-06	1.06003e-05	up	3.275	1.712	2.04993e-06	1.22846e-05	up	13.714	3.778	1.32841e-07	1.0931e-06	up	11.45	3.517	5.23444e-09	3.14768e-08	up
g29615	LG7	31555964	31557849	-	Glutathione S-transferase, C-terminal domain	18	18	26	46	89	183	56439	45942	43726	26026	28239	33819	0.42	2.16333	966.373	594.19	2556.84	11.32	0	0	up	1546.82	10.595	0	0	up	449.623	8.813	1.84352e-59	4.75186e-57	up	271.908	8.087	2.40651e-48	1.44098e-46	up
g29741	LG7	32493280	32495598	-	AP2 domain	7	6	8	2	2	20	147	14	88	51	28	36	0.156667	0.176667	1.76	0.843333	12.398	3.632	2.96406e-06	2.05935e-05	up	5.888	2.558	8.80502e-06	4.68452e-05	up	9.903	3.308	0.000701867	0.00272076	up	4.679	2.226	0.00646493	0.0153155	up
g29786	LG7	32839751	32841812	+	short chain dehydrogenase	205	168	98	207	189	106	438	619	578	388	393	417	2.37333	2.61667	8.43333	6.20333	3.893	1.961	6.81524e-11	1.01657e-09	up	2.806	1.489	2.52139e-10	2.71061e-09	up	3.253	1.702	2.88464e-08	2.61728e-07	up	2.348	1.231	3.68154e-07	1.77555e-06	up
g29845	LG7	33215319	33220725	-	zinc-binding in reverse transcriptase	0	0	0	0	0	0	43	65	21	141	67	113	0	0	0.196667	0.486667	255.861	7.999	9.14251e-09	9.95498e-08	up	623.141	9.283	7.70219e-14	1.25961e-12	up	230.942	7.851	2.39665e-08	2.20169e-07	up	562.174	9.135	2.44331e-13	2.24572e-12	up
g29885	LG7	33467783	33473458	-	Endonuclease/Exonuclease/phosphatase family	79	47	26	0	0	0	265	667	217	888	548	988	0.21	0	1.62333	3.38667	8.569	3.099	6.08019e-10	7.88454e-09	up	17.352	4.117	2.00399e-45	2.60695e-43	up	2091.63	11.03	4.7361e-18	1.32022e-16	up	4254.86	12.055	5.97642e-24	1.17449e-22	up
g29910	LG7	33638122	33639666	+	--	56	19	9	12	22	10	148	180	126	96	83	85	0.483333	0.27	2.68333	1.57333	6.081	2.604	2.74182e-06	1.9245e-05	up	3.504	1.809	0.000686488	0.00244233	up	10.149	3.343	1.58262e-14	3.12082e-13	up	5.859	2.551	6.33523e-09	3.77406e-08	up
g30081	LG7	34690377	34694927	-	Transmembrane amino acid transporter protein	192	80	74	10	16	10	235	184	370	1149	888	1430	1.40333	0.15	3.27667	14.3233	2.555	1.353	0.00147208	0.00533235	up	10.955	3.453	1.24086e-33	9.20694e-32	up	21.737	4.442	9.64229e-24	4.3693e-22	up	93.647	6.549	7.4557e-113	2.6475e-110	up
g30102	LG7	34805801	34808417	+	WRKY DNA -binding domain	168	120	73	98	128	88	252	294	246	332	312	134	1.44	1.30333	3.21	3.22	2.442	1.288	3.84589e-05	0.000210069	up	2.411	1.269	0.00079078	0.00276665	up	2.49	1.316	1.30857e-06	9.15629e-06	up	2.457	1.297	0.00019126	0.000616503	up
g30319	LG8	472363	478679	+	FANCI helical domain 1	243	249	178	98	116	137	298	695	291	924	723	847	1.14	0.616667	2.23333	4.32333	2.146	1.102	0.0036232	0.0116422	up	4.056	2.02	4.99463e-42	5.63718e-40	up	3.669	1.875	1.46868e-06	1.01602e-05	up	6.948	2.797	8.81174e-64	8.84141e-62	up
g30499	LG8	1389085	1391753	-	Protein of unknown function (DUF642)	529	415	389	548	462	696	1164	2219	1163	937	1536	1468	8.00333	10.47	27.69	24.3067	3.801	1.926	8.7097e-11	1.28525e-09	up	3.271	1.71	8.41085e-15	1.52075e-13	up	2.674	1.419	1.23651e-06	8.68267e-06	up	2.303	1.203	1.26733e-08	7.30268e-08	up
g30573	LG8	1818364	1819845	+	F-box-like	0	0	0	0	0	0	19	64	34	75	70	100	0	0	0.72	1.49	238.674	7.899	3.33523e-08	3.3174e-07	up	481.27	8.911	7.46044e-13	1.08579e-11	up	215.22	7.75	8.34258e-08	7.07907e-07	up	434.218	8.762	2.6628e-12	2.23517e-11	up
g30627	LG8	2054421	2056401	-	Polyphenol oxidase middle domain	9093	10803	5366	13045	10309	8158	33194	61162	38831	22842	36434	33819	92.8533	119.497	501.74	354.547	5.924	2.566	3.89438e-18	1.40609e-16	up	4.108	2.038	5.31191e-09	4.8163e-08	up	4.245	2.086	8.91099e-16	1.9973e-14	up	2.945	1.558	4.98279e-07	2.36635e-06	up
g30638	LG8	2121363	2125311	-	Histidine biosynthesis protein	0	0	0	2	2	9	33	37	33	51	71	66	0	0.0666667	0.52	0.97	204.86	7.678	1.57512e-08	1.65911e-07	up	374.362	8.548	1.4633e-11	1.83894e-10	up	7.873	2.977	0.000201336	0.000893251	up	14.374	3.845	3.50472e-09	2.1464e-08	up
g3071	LG1	21697274	21704232	+	D-isomer specific 2-hydroxyacid dehydrogenase, NAD binding domain	2819	2556	2310	1168	1719	1212	7045	7838	6210	4526	4426	5691	40.3767	22.1933	111.263	78.04	3.015	1.592	4.92575e-27	3.92539e-25	up	2.076	1.054	1.05443e-20	3.28267e-19	up	5.058	2.339	3.89161e-32	2.98795e-30	up	3.483	1.8	1.49004e-30	4.19935e-29	up
g30809	LG8	3012700	3013947	-	Torus domain	351	394	634	3844	4171	4011	26137	14918	21351	10140	9020	8889	8.74	76.8233	386.28	177.62	48.165	5.59	2.64868e-95	2.64902e-92	up	21.868	4.451	1.90419e-94	1.15599e-91	up	5.056	2.338	2.56972e-45	3.70928e-43	up	2.291	1.196	7.43607e-37	2.79877e-35	up
g30877	LG8	3390973	3394315	+	Transferase family	5	10	12	16	29	20	61	51	89	58	61	53	0.15	0.366667	1.10667	0.953333	8.123	3.022	1.1857e-07	1.07195e-06	up	6.923	2.791	4.36722e-08	3.44248e-07	up	3.054	1.611	0.00128633	0.00468318	up	2.599	1.378	0.00228494	0.00599385	up
g31004	LG8	4099133	4100104	-	Transferase family	108	55	73	39	47	34	601	101	610	185	148	140	1.99	1.03667	10.9667	4.05	5.996	2.584	1.49629e-06	1.104e-05	up	2.189	1.13	0.000150395	0.000620076	up	10.576	3.403	1.81359e-10	2.23712e-09	up	3.862	1.949	8.69215e-11	6.33633e-10	up
g31005	LG8	4103382	4104804	-	Transferase family	158	198	40	55	42	13	511	416	759	292	166	340	2.30667	0.67	10.1567	4.75667	4.796	2.262	1.00854e-06	7.69825e-06	up	2.202	1.139	0.00775759	0.0208424	up	15.266	3.932	1.15287e-19	3.70854e-18	up	7.011	2.81	1.70512e-12	1.45674e-11	up
g31085	LG8	4562987	4566881	+	Reverse transcriptase-like	58	15	48	39	43	59	221	112	65	153	109	60	1.36333	1.61	4.30667	3.65	3.46	1.791	0.00147395	0.00533767	up	2.9	1.536	0.00251164	0.00774165	up	2.692	1.429	0.00173799	0.00609019	up	2.251	1.171	0.00391335	0.00977428	up
g31370	LG8	6655181	6657147	+	HAD superfamily, subfamily IIIB (Acid phosphatase)	32	18	18	0	12	11	39	46	55	43	56	52	0.49	0.173333	1.01667	1.11	2.29	1.196	0.0164976	0.0425093	up	2.452	1.294	0.00355733	0.0105386	up	5.987	2.582	0.00320079	0.010399	up	6.427	2.684	0.000232747	0.000739493	up
g31438	LG8	7103779	7107490	+	HCO3- transporter family	28	26	4	8	3	12	132	201	297	52	32	138	0.193333	0.0766667	2.19667	0.753333	12.437	3.637	2.21364e-10	3.06576e-09	up	4.151	2.054	0.00202418	0.00641434	up	27.82	4.798	1.60797e-18	4.68292e-17	up	9.291	3.216	9.73239e-07	4.45662e-06	up
g31535	LG8	7697786	7700038	-	Eukaryotic aspartyl protease	251	406	300	102	192	168	2203	2540	1647	972	1244	1701	3.87	1.92333	25.8333	16.0767	7.291	2.866	7.87732e-33	8.95262e-31	up	4.454	2.155	1.88369e-20	5.73072e-19	up	13.56	3.761	7.29935e-47	1.15437e-44	up	8.283	3.05	1.60402e-36	5.93864e-35	up
g31600	LG8	8157170	8160053	+	Glutamine synthetase, beta-Grasp domain	51	66	24	44	48	21	187	248	301	212	159	300	0.783333	0.653333	4.21333	3.79667	5.87	2.553	1.81551e-10	2.55378e-09	up	5.178	2.372	5.8908e-12	7.77426e-11	up	6.507	2.702	1.46351e-11	2.08073e-10	up	5.748	2.523	1.73217e-13	1.61536e-12	up
g31810	LG8	9951271	9952342	+	Leucine Rich Repeat	30	22	31	0	0	0	66	43	69	186	129	183	0.576667	0	1.22	3.44333	2.329	1.22	0.00548429	0.0167097	up	6.468	2.693	3.11216e-19	8.48841e-18	up	317.351	8.31	2.17581e-10	2.6518e-09	up	879.053	9.78	8.99502e-16	1.01472e-14	up
g31941	LG8	11057761	11062863	-	--	96	108	94	54	50	48	324	190	221	316	130	244	2.46	1.28	5.99	5.67	2.657	1.41	2.18043e-08	2.23261e-07	up	2.473	1.306	6.93393e-06	3.77065e-05	up	4.706	2.235	7.81195e-16	1.75891e-14	up	4.374	2.129	8.39528e-12	6.73817e-11	up
g31959	LG8	11183198	11187663	-	Sulfotransferase family	32	1	6	34	18	39	272	281	202	114	141	225	0.19	0.46	3.76333	2.42333	21.7	4.44	4.32648e-05	0.000233325	up	13.706	3.777	0.000712077	0.00252507	up	8.212	3.038	1.62303e-19	5.17065e-18	up	5.193	2.376	3.51241e-10	2.3938e-09	up
g3216	LG1	22949614	22950316	-	CP12 domain	10	3	7	0	0	1	13	40	23	42	21	37	0.21	0.01	0.816667	1.04667	4.275	2.096	0.0110986	0.0305029	up	5.369	2.425	0.000170152	0.000693539	up	71.657	6.163	3.37936e-05	0.000177933	up	89.958	6.491	1.52579e-06	6.78007e-06	up
g32315	LG8	14079928	14088432	-	Family of unknown function (DUF5488)	24	52	26	15	0	14	63	117	61	143	99	131	0.206667	0.06	0.496667	0.766667	2.624	1.392	0.0061946	0.018556	up	3.963	1.987	3.35444e-08	2.69128e-07	up	8.459	3.081	0.000147586	0.000675245	up	12.698	3.666	2.30509e-11	1.77342e-10	up
g32410	LG8	14942352	14951375	-	Protein of unknown function (DUF1258)	0	4	4	0	4	1	103	28	88	9	13	25	0.0133333	0.00666667	0.28	0.0633333	29.005	4.858	6.30769e-09	7.05252e-08	up	6.269	2.648	0.00998691	0.0259329	up	41.927	5.39	1.04338e-08	1.01165e-07	up	9.033	3.175	0.00642307	0.0152313	up
g32538	LG8	15881987	15884905	-	Protein of unknown function (DUF 659)	1	0	0	8	8	4	74	32	74	174	93	165	0.00333333	0.0666667	0.576667	1.39667	181.276	7.502	1.30863e-08	1.39456e-07	up	431.003	8.752	9.23477e-13	1.3281e-11	up	8.791	3.136	7.97001e-07	5.77212e-06	up	20.888	4.385	6.12037e-21	9.96561e-20	up
g32813	LG8	17859099	17861965	-	Trypsin and protease inhibitor	10	2	8	0	0	0	24	22	34	18	27	18	0.176667	0	0.716667	0.57	4.4	2.137	0.0056213	0.0170726	up	3.479	1.799	0.0177759	0.0426152	up	144.204	7.172	6.71034e-07	4.92634e-06	up	114.075	6.834	2.37984e-06	1.03005e-05	up
g3295	LG1	23567231	23568346	+	Ribosomal protein S27	22	25	15	30	26	39	294	93	143	120	179	216	0.61	0.956667	5.09	5.18667	9.079	3.183	3.66775e-12	6.56503e-11	up	9.134	3.191	1.64024e-18	4.18597e-17	up	5.336	2.416	4.45488e-08	3.92708e-07	up	5.36	2.422	2.20483e-12	1.863e-11	up
g33005	LG8	19271541	19274180	-	--	0	0	0	0	0	0	594	738	469	330	223	264	0	0	11.6767	5.33333	3576.85	11.804	1.56695e-22	8.76725e-21	up	1601.68	10.645	8.33215e-19	2.19634e-17	up	3228.74	11.657	4.71486e-22	1.88286e-20	up	1445.16	10.497	2.81497e-18	3.8498e-17	up
g33093	LG8	19833804	19834737	+	Trypsin and protease inhibitor	210	104	83	80	167	42	415	762	401	521	428	203	3.09	2.36667	12.5733	9.27	4.472	2.161	3.18595e-08	3.1784e-07	up	3.234	1.694	8.15434e-06	4.372e-05	up	5.384	2.429	2.48685e-07	1.95515e-06	up	3.9	1.963	0.00413107	0.0102616	up
g33435	LG8	22680860	22681420	+	--	0	0	0	0	0	0	17	0	15	19	10	20	0	0	0.413333	0.643333	61.525	5.943	0.00864887	0.0246895	up	95.092	6.571	7.91441e-06	4.25533e-05	up	55.64	5.798	0.0127928	0.0344068	up	85.772	6.422	2.37191e-05	8.87338e-05	up
g33596	LG8	24026834	24028942	+	Got1/Sft2-like family	2	3	1	26	9	9	36	69	34	45	48	92	0.04	0.293333	0.926667	1.22667	25.809	4.69	3.59637e-08	3.54835e-07	up	33.433	5.063	2.96015e-11	3.56919e-10	up	3.191	1.674	0.0116821	0.031849	up	4.132	2.047	0.000252328	0.000797486	up
g33658	LG8	24604896	24608300	+	--	0	0	0	0	0	0	6	7	5	3	2	13	0	0	0.103333	0.103333	35.719	5.159	0.00963974	0.0270585	up	34.429	5.106	0.0102537	0.0265414	up	32.247	5.011	0.0152782	0.0399333	up	31.046	4.956	0.0166971	0.0356751	up
g3372	LG1	24082407	24089428	+	Galactose mutarotase-like	7	0	8	25	14	23	97	93	100	71	34	54	0.0466667	0.183333	0.846667	0.463333	21.035	4.395	3.81462e-12	6.81571e-11	up	11.27	3.494	5.6773e-07	3.74132e-06	up	4.646	2.216	3.03082e-08	2.73926e-07	up	2.495	1.319	0.0056011	0.0134659	up
g33834	LG8	25900231	25903701	-	Ubiquitin-conjugating enzyme	20	59	12	33	38	28	101	124	196	82	82	233	0.603333	0.69	2.90333	2.68667	5.218	2.383	3.90338e-05	0.000213006	up	4.729	2.241	7.5801e-05	0.000333529	up	4.26	2.091	7.30716e-07	5.32705e-06	up	3.864	1.95	1.00196e-05	3.97638e-05	up
g34085	LG9	777984	783830	+	Leucine-zipper of ternary complex factor MIP1	22	11	13	2	9	11	361	51	421	31	36	95	0.1	0.0466667	1.86	0.363333	19.659	4.297	2.45735e-11	3.91815e-10	up	3.803	1.927	0.000764116	0.00268254	up	36.645	5.196	1.03829e-12	1.68225e-11	up	7.085	2.825	4.49564e-05	0.000160452	up
g34132	LG9	994496	995719	+	Plant protein of unknown function (DUF641)	44	45	42	21	19	29	141	293	129	73	101	93	1.08333	0.58	4.70333	2.25667	4.77	2.254	8.2367e-08	7.64878e-07	up	2.239	1.163	0.000430578	0.00160753	up	8.182	3.033	3.89459e-11	5.23167e-10	up	3.841	1.942	1.07349e-06	4.885e-06	up
g34155	LG9	1119812	1121625	+	UDP-glucoronosyl and UDP-glucosyl transferase	1754	1897	1773	436	375	613	22187	19985	21137	7786	6844	9065	23.8467	6.37333	278.233	105.157	12.744	3.672	2.1751e-211	8.7015e-208	up	4.733	2.243	5.9379e-102	4.665e-99	up	43.974	5.459	2.3963e-226	1.189e-222	up	16.315	4.028	1.2649e-177	1.1229e-174	up
g34169	LG9	1185852	1187401	+	NAD dependent epimerase/dehydratase family	1299	1228	934	1166	941	913	2396	2365	1976	2726	2700	3365	17.4233	15.5867	34.07	45.0767	2.137	1.095	3.60079e-13	7.35698e-12	up	2.777	1.474	1.49036e-29	8.85967e-28	up	2.203	1.139	4.40701e-16	1.02063e-14	up	2.861	1.517	1.183e-37	4.6363e-36	up
g34304	LG9	1869828	1872451	+	Protein of unknown function (DUF677)	32	32	60	48	53	28	124	144	62	108	105	119	0.493333	0.52	1.28667	1.32333	2.851	1.511	0.00147282	0.00533407	up	2.879	1.525	2.62206e-05	0.000126181	up	2.503	1.324	0.0034834	0.0111872	up	2.522	1.335	0.000102577	0.000345909	up
g34344	LG9	2092071	2097073	-	Mlo family	23	9	15	0	6	2	48	137	42	52	44	18	0.183333	0.0333333	0.9	0.456667	5.413	2.437	0.000176049	0.00082008	up	2.677	1.421	0.0193856	0.0459627	up	28.127	4.814	1.20831e-07	9.9883e-07	up	13.953	3.803	2.00488e-05	7.58154e-05	up
g34384	LG9	2321932	2323058	+	MBOAT, membrane-bound O-acyltransferase family	27	28	6	17	11	5	111	220	156	76	48	39	0.39	0.22	3.23333	1.07667	9.071	3.181	2.55608e-09	3.0343e-08	up	2.955	1.563	0.0053386	0.0150243	up	14.878	3.895	7.49567e-14	1.37814e-12	up	4.85	2.278	6.73891e-05	0.000233872	up
g34507	LG9	3061975	3065847	+	--	17	33	16	32	24	14	70	40	74	90	78	95	0.213333	0.233333	0.603333	0.873333	3.045	1.606	0.00155302	0.00558358	up	4.343	2.119	5.5489e-08	4.30784e-07	up	2.587	1.371	0.00740244	0.0215474	up	3.686	1.882	2.89693e-06	1.23941e-05	up
g34520	LG9	3161351	3162640	-	Glutamine amidotransferase domain	228	230	243	297	349	298	1097	1769	774	832	717	681	5.03	6.92	26.14	16.1767	5.702	2.512	1.4594e-16	4.45334e-15	up	3.461	1.791	2.72356e-29	1.58612e-27	up	3.82	1.934	5.39679e-11	7.11241e-10	up	2.318	1.213	1.10368e-14	1.13873e-13	up
g34667	LG9	4101554	4102528	-	Domain of unknown function (DUF4228)	62	47	45	12	16	20	117	211	167	153	130	143	1.16	0.373333	3.8	3.26	3.59	1.844	7.09654e-07	5.5677e-06	up	3.017	1.593	1.57387e-09	1.52688e-08	up	10.339	3.37	2.37958e-14	4.59423e-13	up	8.698	3.121	2.00524e-18	2.77493e-17	up
g34786	LG9	4937201	4939030	+	3-beta hydroxysteroid dehydrogenase/isomerase family	0	0	0	2	12	4	65	442	27	50	131	165	0	0.126667	3.62667	2.34667	1096.79	10.099	3.14132e-06	2.17307e-05	up	689.597	9.43	1.95613e-13	3.03902e-12	up	29.668	4.891	0.000214499	0.000944801	up	18.848	4.236	2.19146e-11	1.69046e-10	up
g34874	LG9	5599382	5602010	-	--	0	1	0	3	0	0	16	38	16	48	45	36	0.00666667	0.0233333	0.553333	1.02	72.489	6.18	2.65806e-05	0.000149874	up	131.308	7.037	4.89195e-08	3.83123e-07	up	23.767	4.571	0.000431948	0.00177075	up	42.737	5.417	1.27045e-07	6.51203e-07	up
g35092	LG9	7338408	7339644	+	AP2 domain	95	75	90	61	101	70	206	168	151	259	353	155	1.55333	1.42	3.10667	4.71667	2.189	1.13	9.88299e-06	6.1345e-05	up	3.281	1.714	5.19863e-07	3.45543e-06	up	2.204	1.14	0.000230896	0.00100863	up	3.302	1.724	1.28715e-06	5.78318e-06	up
g35139	LG9	7625074	7626901	-	AP2 domain	10	3	24	11	6	4	131	12	100	71	61	81	0.16	0.09	0.99	0.893333	6.763	2.758	0.00180067	0.00635629	up	6.102	2.609	1.14645e-05	5.96558e-05	up	11.14	3.478	2.69836e-05	0.000145374	up	9.952	3.315	2.71229e-10	1.87763e-09	up
g35146	LG9	7681523	7686731	-	Pyridoxal-phosphate dependent enzyme	65	112	74	285	260	285	2370	1611	2752	736	891	830	2.04333	6.91	55.04	20.45	29.33	4.874	1.30703e-72	8.86236e-70	up	10.746	3.426	5.59798e-51	8.7274e-49	up	8.013	3.002	4.02751e-47	6.42056e-45	up	2.932	1.552	9.17228e-22	1.57713e-20	up
g3524	LG1	25284099	25287354	-	Chalcone isomerase like	234	138	130	213	163	247	6469	7754	5787	3819	3903	4087	4.30667	5.48333	173.537	103.71	44.116	5.463	1.3489e-122	2.1585e-119	up	25.869	4.693	1.0046e-147	1.7501e-144	up	31.917	4.996	7.7304e-157	1.3948e-153	up	18.716	4.226	3.5509e-222	5.0003e-219	up
g35331	LG9	9027552	9028277	-	Reverse transcriptase-like	2	3	0	0	0	0	33	74	31	71	71	98	0.0566667	0	1.61667	2.80667	31.045	4.956	1.70244e-07	1.49388e-06	up	52.403	5.712	4.89794e-14	8.1633e-13	up	250.767	7.97	1.09569e-08	1.05747e-07	up	426.007	8.735	3.37095e-12	2.80308e-11	up
g35582	LG9	11044609	11050301	+	PA domain	5	8	6	7	9	4	31	47	23	16	25	36	0.0366667	0.0366667	0.183333	0.143333	5.839	2.546	0.000182956	0.000849088	up	4.416	2.143	0.00161167	0.00522788	up	4.99	2.319	0.00106106	0.00394481	up	3.773	1.916	0.00805636	0.0186	up
g35656	LG9	11560051	11563506	+	PA domain	6	27	14	9	13	18	61	119	40	87	80	89	0.143333	0.126667	0.69	0.81	5.155	2.366	0.000396168	0.00168927	up	5.917	2.565	1.24566e-07	9.14265e-07	up	5.47	2.452	5.18405e-05	0.000262008	up	6.277	2.65	7.81113e-10	5.1267e-09	up
g35739	LG9	12279539	12282279	+	Domain of unknown function DUF223	645	709	540	44	60	52	1749	1045	1405	1373	1111	1350	6.6	0.56	14.5633	13.5467	2.404	1.265	5.64884e-12	9.84241e-11	up	2.202	1.139	7.89669e-22	2.66103e-20	up	26.215	4.712	1.38202e-95	9.6244e-93	up	24.022	4.586	1.9808e-162	1.371e-159	up
g35749	LG9	12363348	12375866	+	Reverse transcriptase (RNA-dependent DNA polymerase)	0	0	0	0	0	0	10	27	10	10	11	13	0	0	0.12	0.0866667	95.036	6.57	5.33005e-05	0.000281639	up	67.16	6.07	0.000101606	0.000435684	up	85.723	6.422	0.00011167	0.00052502	up	60.603	5.921	0.000276562	0.0008671	up
g35753	LG9	12393903	12394603	-	--	700	643	760	562	516	431	2696	1915	2169	1745	1438	1834	22.2	16.2	70.81	53.2433	3.482	1.8	6.27901e-30	6.02378e-28	up	2.578	1.366	1.2225e-25	5.65612e-24	up	4.4	2.137	2.43842e-46	3.76626e-44	up	3.252	1.701	4.37149e-44	2.29754e-42	up
g35761	LG9	12460093	12462781	-	Root hair defective 3 GTP-binding protein (RHD3)	6	1	1	13	9	4	469	430	409	66	63	74	0.0333333	0.123333	5.97333	0.943333	179.064	7.484	5.47221e-41	1.00883e-38	up	27.833	4.799	8.4303e-13	1.21721e-11	up	49.616	5.633	1.14741e-54	2.66353e-52	up	7.677	2.941	1.33867e-08	7.69204e-08	up
g3586	LG1	25773999	25777202	-	Chalcone-flavanone isomerase	163	136	150	113	147	233	6845	7283	5837	3197	3770	3837	3.54	3.96667	157.21	86.59	48.642	5.604	1.3939e-248	9.294e-245	up	26.347	4.72	1.6335e-195	5.0346e-192	up	39.957	5.32	4.5203e-114	4.2722e-111	up	21.634	4.435	8.93715e-40	3.91595e-38	up
g35871	LG9	13227633	13230678	-	Protein-only RNase P	15	15	31	25	19	20	70	82	53	233	198	257	0.503333	0.526667	1.66	5.61333	3.62	1.856	0.000265206	0.00118042	up	12.114	3.599	2.27949e-27	1.16644e-25	up	3.169	1.664	0.000146281	0.000669743	up	10.532	3.397	1.93932e-31	5.70577e-30	up
g35971	LG9	14027977	14030793	+	--	7	14	0	0	0	0	56	28	64	42	38	94	0.0833333	0	0.606667	0.716667	7.85	2.973	0.000632696	0.00254894	up	9.073	3.182	2.24904e-05	0.000109946	up	263.646	8.042	3.17914e-09	3.33498e-08	up	305.151	8.253	3.20901e-10	2.20172e-09	up
g35985	LG9	14137546	14139677	+	--	10	9	10	7	12	7	80	12	23	166	133	99	0.146667	0.14	0.56	2.07	4.085	2.03	0.0091752	0.0259641	up	14.983	3.905	1.42296e-20	4.36885e-19	up	4.1	2.036	0.0133233	0.0356455	up	15.033	3.91	4.27863e-18	5.76465e-17	up
g36130	LG9	15270864	15276119	+	--	46	64	48	68	58	66	244	87	117	145	94	199	0.6	0.743333	1.65667	1.66333	3.001	1.585	9.8941e-05	0.000491145	up	2.975	1.573	9.81217e-07	6.18833e-06	up	2.236	1.161	0.00300395	0.0098455	up	2.211	1.145	0.000189012	0.000609834	up
g36189	LG9	15754922	15766502	+	Pectate lyase superfamily protein	0	0	0	15	27	38	366	207	232	138	83	108	0	0.243333	2.37	0.986667	1566.55	10.613	2.8532e-18	1.04718e-16	up	643.02	9.329	3.44685e-14	5.83953e-13	up	9.735	3.283	2.47215e-18	7.0396e-17	up	3.991	1.997	7.41547e-07	3.44708e-06	up
g36269	LG9	16299783	16304450	+	Leucine rich repeat	19	29	42	0	0	0	530	223	440	185	140	177	0.236667	0	3.05667	1.31	14.083	3.816	1.65427e-21	8.52822e-20	up	5.977	2.579	2.42109e-14	4.17769e-13	up	2101.9	11.037	2.88849e-19	8.95772e-18	up	888.803	9.796	7.23659e-16	8.22719e-15	up
g36297	LG9	16484805	16499922	+	--	0	0	0	0	0	0	16	12	24	42	42	43	0	0	0.31	0.76	103.721	6.697	1.40182e-05	8.41916e-05	up	251.123	7.972	6.46444e-10	6.59564e-09	up	93.651	6.549	3.24518e-05	0.000171665	up	226.613	7.824	2.42167e-09	1.51121e-08	up
g36329	LG9	16700813	16703452	-	C-terminal domain on Strawberry notch homologue	58	15	32	60	54	65	247	258	219	101	170	143	0.48	0.843333	3.33	1.95333	7.593	2.925	4.36012e-12	7.72825e-11	up	4.383	2.132	2.42626e-06	1.43171e-05	up	3.998	1.999	1.62643e-15	3.53759e-14	up	2.307	1.206	0.000210505	0.000674438	up
g36380	LG9	17109181	17126795	+	--	7	0	0	1	1	3	14	7	39	13	15	29	0.0133333	0.0133333	0.13	0.12	9.923	3.311	0.018846	0.0474527	up	9.062	3.18	0.00615478	0.0170067	up	12.1	3.597	0.00223492	0.00760588	up	11.13	3.476	0.000754725	0.00218478	up
g365	LG1	1926123	1927022	+	--	113	69	78	83	89	81	229	202	145	202	144	193	2.83333	2.83	6.24667	5.93333	2.411	1.27	1.78423e-05	0.00010463	up	2.25	1.17	5.12262e-06	2.84711e-05	up	2.226	1.155	1.51543e-05	8.60096e-05	up	2.076	1.054	9.70635e-06	3.86258e-05	up
g36787	LG9	20173101	20175905	-	Helix-turn-helix domain of transposase family ISL3	13	21	6	0	5	0	50	36	44	105	44	102	0.16	0.0233333	0.533333	1.02667	3.573	1.837	0.001607	0.00575232	up	6.758	2.757	6.06421e-08	4.68611e-07	up	25.051	4.647	4.56804e-06	2.87914e-05	up	47.774	5.578	1.90706e-11	1.48115e-10	up
g36831	LG9	20474287	20474830	+	--	0	0	0	0	1	2	7	46	10	32	48	45	0	0.04	0.876667	1.73	129.491	7.017	2.61101e-05	0.000147575	up	249.137	7.961	1.0781e-09	1.0671e-08	up	21.377	4.418	0.00137448	0.00496016	up	41.306	5.368	1.29666e-07	6.63889e-07	up
g36943	LG9	21452228	21453564	-	--	0	0	0	0	0	0	38	22	14	23	17	24	0	0	0.706667	0.626667	142.591	7.156	1.01811e-06	7.76099e-06	up	125.35	6.97	5.73842e-07	3.77849e-06	up	128.862	7.01	2.56207e-06	1.69136e-05	up	113.087	6.821	1.97624e-06	8.64157e-06	up
g37076	LG9	22655820	22661049	+	C2 domain	115	54	27	80	113	88	517	437	314	281	335	414	0.976667	1.47333	6.39667	5.33	7.153	2.838	1.00766e-11	1.69732e-10	up	5.85	2.548	2.74933e-11	3.32801e-10	up	4.391	2.135	1.28691e-16	3.14943e-15	up	3.593	1.845	3.97674e-14	3.90286e-13	up
g37155	LG9	23329668	23332152	-	Plant transposase (Ptta/En/Spm family)	0	0	0	0	0	0	12	28	23	25	22	12	0	0	0.42	0.39	127.934	6.999	3.58027e-06	2.4421e-05	up	117.397	6.875	1.73403e-06	1.05205e-05	up	115.408	6.851	8.46364e-06	5.04905e-05	up	105.956	6.727	5.1067e-06	2.11033e-05	up
g37293	LG9	24539528	24540880	+	--	42	31	54	177	148	195	589	402	485	744	572	747	0.82	3.38667	9.37333	13.2933	12.524	3.647	5.87548e-40	1.01314e-37	up	17.512	4.13	2.86116e-78	1.11299e-75	up	2.785	1.478	3.39998e-14	6.45135e-13	up	3.882	1.957	1.19884e-36	4.45876e-35	up
g37401	LG9	25503365	25506388	-	EamA-like transporter family	294	252	400	220	202	246	2106	858	1727	920	716	948	4.19	2.98667	20.3	11.4167	5.277	2.4	1.37354e-14	3.35871e-13	up	2.93	1.551	3.44342e-14	5.83618e-13	up	6.828	2.771	9.71873e-25	4.81029e-23	up	3.782	1.919	2.05785e-43	1.05441e-41	up
g37543	LG9	26575813	26579611	+	2OG-Fe(II) oxygenase superfamily	20	18	8	15	20	21	78	34	82	261	195	177	0.163333	0.206667	0.71	2.34667	4.63	2.211	8.26144e-05	0.000417613	up	15.084	3.915	9.19775e-29	5.12554e-27	up	3.385	1.759	0.00083337	0.00317411	up	11.079	3.47	7.26377e-26	1.5965e-24	up
g3759	LG1	27189691	27193005	-	PRONE (Plant-specific Rop nucleotide exchanger)	6	6	0	12	6	6	80	64	84	13	32	31	0.04	0.0766667	0.74	0.25	21.078	4.398	2.7831e-11	4.40594e-10	up	7.158	2.84	0.00131218	0.00435188	up	9.414	3.235	6.9221e-10	7.89577e-09	up	3.176	1.667	0.0214822	0.0446675	up
g37687	LG9	27777381	27790952	-	Zinc knuckle	17	10	13	1	11	12	150	146	102	70	55	54	0.153333	0.0933333	1.5	0.686667	10.839	3.438	2.28075e-17	7.6225e-16	up	4.874	2.285	2.83068e-07	1.96631e-06	up	16.15	4.013	4.13018e-12	6.2695e-11	up	7.258	2.86	4.85093e-06	2.01277e-05	up
g37694	LG9	27834065	27837684	-	Protein of unknown function (DUF688)	24	54	42	33	20	39	125	159	117	91	128	141	0.376667	0.293333	1.26	1.15	3.654	1.869	3.75909e-06	2.55578e-05	up	3.271	1.71	7.77219e-06	4.18503e-05	up	4.344	2.119	2.99393e-08	2.70852e-07	up	3.884	1.958	1.57964e-07	7.99751e-07	up
g37814	LG9	28706056	28717789	+	--	29	25	29	33	9	11	177	75	146	186	93	140	0.276667	0.173333	1.29333	1.38	5.154	2.366	6.75318e-09	7.52327e-08	up	5.415	2.437	6.36141e-13	9.31929e-12	up	7.39	2.885	1.68017e-07	1.36027e-06	up	7.731	2.951	1.67734e-10	1.18487e-09	up
g37816	LG9	28737696	28744117	+	--	6	4	11	6	1	3	67	37	35	61	53	51	0.12	0.0566667	0.756667	0.933333	6.997	2.807	1.22047e-05	7.42925e-05	up	8.485	3.085	1.43845e-08	1.22158e-07	up	13.552	3.76	8.22898e-07	5.94556e-06	up	16.329	4.029	2.04661e-09	1.28679e-08	up
g37838	LG9	28869136	28870466	+	Sulfotransferase family	0	0	0	0	0	0	11	25	20	14	17	12	0	0	0.316667	0.243333	113.602	6.828	8.95212e-06	5.61345e-05	up	85.833	6.423	1.7325e-05	8.68247e-05	up	102.484	6.679	2.06363e-05	0.000113835	up	77.473	6.276	5.04484e-05	0.000179004	up
g3789	LG1	27390476	27393764	-	Protein of unknown function (DUF620)	214	170	88	76	121	110	398	450	397	406	299	358	2.07	1.40667	5.56667	4.77333	2.939	1.555	2.74361e-07	2.32194e-06	up	2.473	1.306	8.72529e-07	5.56593e-06	up	4	2	2.30045e-14	4.45011e-13	up	3.37	1.753	1.79861e-14	1.81761e-13	up
g3792	LG1	27425809	27427243	+	--	0	1	2	0	0	2	22	27	19	4	9	26	0.02	0.01	0.38	0.216667	24.579	4.619	4.61244e-05	0.000247314	up	13.747	3.781	0.00460617	0.0131901	up	33.75	5.077	0.00014346	0.00065895	up	18.976	4.246	0.00607434	0.0144851	up
g37939	LG9	29690351	29691957	-	--	226	259	295	172	127	172	387	808	268	359	528	572	3.95	2.41333	7.42333	7.49	2.064	1.045	0.00837042	0.024018	up	2.04	1.028	1.70842e-05	8.57251e-05	up	3.114	1.639	2.78537e-05	0.000149635	up	3.075	1.62	1.90422e-12	1.6214e-11	up
g37942	LG9	29729912	29735670	+	Reverse transcriptase (RNA-dependent DNA polymerase)	7	24	9	0	8	0	121	357	108	326	193	266	0.0833333	0.02	1.29667	1.71333	16.437	4.039	1.01917e-10	1.48856e-09	up	21.196	4.406	2.05807e-30	1.28045e-28	up	71.158	6.153	0.000612313	0.002412	up	92.157	6.526	4.63889e-05	0.00016529	up
g37995	LG9	30181478	30184273	-	Domain of unknown function (DUF588)	2	0	0	1	0	0	43	39	23	47	51	86	0.0133333	0.00666667	0.656667	1.16667	57.348	5.842	2.24925e-06	1.60451e-05	up	100.162	6.646	4.3891e-09	4.02237e-08	up	95.431	6.576	1.67572e-06	1.14765e-05	up	167.207	7.385	8.86599e-09	5.20501e-08	up
g38118	LG9	31106942	31107882	-	--	47	25	21	45	50	46	148	144	149	98	76	144	0.913333	1.44	4.41	3.18333	5.246	2.391	1.15235e-10	1.66968e-09	up	3.718	1.894	1.39215e-06	8.5933e-06	up	3.088	1.627	2.68572e-08	2.44967e-07	up	2.188	1.13	0.000765684	0.00221353	up
g38246	LG10	583571	587443	+	Uracil phosphoribosyltransferase	4138	3689	3599	718	734	584	8334	6734	6689	13437	7709	9344	75.51	13.78	143.223	202.613	2.072	1.051	1.57142e-25	1.1327e-23	up	2.88	1.526	2.56336e-23	9.72598e-22	up	10.473	3.389	4.3231e-152	6.8643e-149	up	14.546	3.863	4.7932e-146	2.5095e-143	up
g38347	LG10	1251437	1253376	-	Plants and Prokaryotes Conserved (PCC) domain	44	35	46	82	91	101	574	830	743	181	175	315	0.506667	1.12667	8.74	2.72	18.987	4.247	3.75777e-49	1.11355e-46	up	5.783	2.532	2.40146e-16	5.04558e-15	up	7.826	2.968	3.00997e-31	2.18429e-29	up	2.384	1.253	5.57534e-06	2.29447e-05	up
g38440	LG10	1932695	1935252	+	Glycosyltransferase family 28 C-terminal domain	11	10	2	0	0	0	95	58	71	43	35	46	0.106667	0	1.08333	0.613333	10.674	3.416	2.75947e-09	3.26123e-08	up	5.93	2.568	1.94021e-05	9.62585e-05	up	395.92	8.629	1.52722e-11	2.1653e-10	up	219.658	7.779	3.27141e-09	2.01046e-08	up
g38641	LG10	3193440	3198309	+	Zinc finger, C2H2 type	72	56	63	406	240	352	3270	659	2680	769	667	842	0.82	4.35333	27.9033	9.89	36.912	5.206	3.86838e-17	1.25105e-15	up	12.952	3.695	7.32688e-98	5.33756e-95	up	6.425	2.684	1.786e-05	9.97963e-05	up	2.246	1.168	1.20788e-11	9.55935e-11	up
g38691	LG10	3522035	3526643	-	Alpha/beta hydrolase family	1537	1398	642	1013	758	486	4168	3897	5349	3016	2983	3937	15.9233	10.4033	61.11	45.4667	4.193	2.068	2.79558e-13	5.78867e-12	up	3.064	1.615	4.54012e-12	6.06971e-11	up	5.918	2.565	5.41285e-24	2.52187e-22	up	4.324	2.112	1.74141e-12	1.48587e-11	up
g38716	LG10	3730174	3730890	-	--	13	5	12	19	8	9	97	103	81	107	189	146	0.353333	0.423333	3.27333	5.29333	10.22	3.353	4.32571e-12	7.67746e-11	up	16.293	4.026	1.2405e-18	3.20773e-17	up	7.752	2.955	7.20864e-10	8.20141e-09	up	12.339	3.625	5.4859e-16	6.3e-15	up
g38871	LG10	4821132	4827064	-	--	27	18	10	12	7	6	55	34	48	76	54	46	0.166667	0.08	0.416667	0.546667	2.737	1.452	0.00627054	0.0187442	up	3.522	1.816	0.000121807	0.000511897	up	5.386	2.429	3.98451e-05	0.000205998	up	6.93	2.793	2.42172e-07	1.19844e-06	up
g39025	LG10	6043440	6045074	+	Heavy-metal-associated domain	2	0	2	3	0	0	14	14	53	14	11	8	0.03	0.0233333	0.623333	0.246667	22.701	4.505	0.000117251	0.000572237	up	8.963	3.164	0.00733814	0.0198727	up	27.859	4.8	0.000353448	0.0014767	up	11	3.459	0.014176	0.0308306	up
g39122	LG10	6793026	6793948	-	--	45	18	33	0	0	0	275	7	193	236	165	181	1.07333	0	5.14	6.54667	5.209	2.381	0.00499515	0.0154131	up	6.577	2.718	3.30175e-16	6.82618e-15	up	818.318	9.677	1.32249e-05	7.60154e-05	up	1031.15	10.01	1.52337e-16	1.82434e-15	up
g39230	LG10	7534217	7535248	+	--	29	12	24	14	7	23	75	33	80	61	67	51	0.466667	0.32	1.33333	1.30667	3.135	1.648	0.00293624	0.00969017	up	3.021	1.595	0.00048665	0.00179561	up	4.215	2.075	0.000664579	0.00259038	up	4.054	2.02	9.76682e-05	0.000330555	up
g39333	LG10	8413231	8415755	-	Leucine Rich Repeat	46	49	32	78	33	104	141	220	148	224	174	179	0.38	0.656667	1.55333	1.76	4.455	2.155	1.78602e-09	2.17569e-08	up	4.96	2.31	3.74775e-18	9.33258e-17	up	2.383	1.253	0.00430885	0.0134635	up	2.652	1.407	5.56292e-05	0.000196143	up
g39605	LG10	10477454	10478968	+	Chitin recognition protein	285	103	70	56	149	39	662	217	268	621	467	240	3.73667	2.11	9.23	11.2333	2.693	1.429	0.00423837	0.0133488	up	3.249	1.7	0.0121562	0.0307975	up	4.391	2.135	4.01736e-05	0.000207561	up	5.294	2.404	0.000684157	0.00199749	up
g39673	LG10	10987029	10988590	+	Chitin recognition protein	85	42	17	11	49	14	203	256	91	359	315	114	1.15	0.633333	4.46333	6.59	4.258	2.09	0.000146846	0.00069786	up	6.18	2.628	1.84608e-07	1.32368e-06	up	7.162	2.84	3.02361e-06	1.96855e-05	up	10.405	3.379	5.12559e-05	0.000181712	up
g39691	LG10	11141211	11142733	+	Chitin recognition protein	172	74	44	19	85	14	281	440	150	415	362	137	2.37333	1.03333	7.27667	7.81333	3.368	1.752	0.000529561	0.00217909	up	3.554	1.83	0.00900322	0.023709	up	7.138	2.836	8.46002e-06	5.04766e-05	up	7.539	2.914	0.00157365	0.00427367	up
g39703	LG10	11219169	11223177	-	gag-polypeptide of LTR copia-type	25	9	22	12	1	9	48	78	47	49	45	62	0.15	0.0566667	0.456667	0.41	3.404	1.767	0.00168822	0.0060065	up	3.014	1.592	0.00106332	0.00360594	up	7.953	2.992	3.71454e-05	0.000193489	up	7.02	2.811	1.05001e-05	4.15213e-05	up
g39912	LG10	12737627	12740810	+	Protease inhibitor/seed storage/LTP family	109	51	89	36	34	19	323	394	219	394	403	381	1.90667	0.693333	7.12	9.13	4.107	2.038	8.61801e-09	9.4275e-08	up	5.171	2.37	6.13506e-19	1.63223e-17	up	10.369	3.374	5.53858e-21	2.0078e-19	up	13.052	3.706	1.95207e-44	1.03798e-42	up
g39991	LG10	13360407	13366158	-	Helix-turn-helix domain	4	13	9	4	3	2	98	14	81	51	22	54	0.0966667	0.03	0.69	0.46	7.862	2.975	0.000135015	0.000647837	up	5.186	2.375	0.000115932	0.000489366	up	20.68	4.37	5.87268e-07	4.34755e-06	up	13.584	3.764	4.61222e-07	2.19829e-06	up
g40016	LG10	13528204	13533158	-	hAT family C-terminal dimerisation region	3	0	1	9	2	14	129	29	137	27	39	43	0.0166667	0.103333	1.19667	0.453333	80.009	6.322	1.17836e-10	1.70489e-09	up	30.006	4.907	1.36267e-07	9.94498e-07	up	11.613	3.538	2.09147e-06	1.40333e-05	up	4.35	2.121	0.00204198	0.00542047	up
g40140	LG10	14453885	14455579	-	--	1	1	0	0	2	0	21	1	18	18	3	12	0.02	0.0233333	0.42	0.35	21.585	4.432	0.00666073	0.0197526	up	17.582	4.136	0.0049049	0.0139369	up	18.798	4.233	0.0167665	0.0432309	up	15.403	3.945	0.0125379	0.027638	up
g40356	LG10	16021090	16030095	+	SWIM zinc finger	3	0	17	14	15	16	62	27	69	42	34	58	0.04	0.0866667	0.296667	0.253333	8.211	3.037	0.00238628	0.00811002	up	6.943	2.796	0.00138872	0.00458421	up	3.442	1.783	0.00153341	0.00545712	up	2.898	1.535	0.00195732	0.00521777	up
g40394	LG10	16248770	16249798	+	--	9	4	11	1	3	7	48	31	53	38	29	17	0.343333	0.16	1.86	1.20333	5.957	2.575	4.06911e-05	0.000221145	up	3.799	1.926	0.00425059	0.0123162	up	11.803	3.561	4.51889e-06	2.84952e-05	up	7.525	2.912	0.000489682	0.00146951	up
g40464	LG10	16781614	16797981	-	Domain of unknown function (DUF4219)	14	18	8	11	15	2	66	138	38	38	42	30	0.05	0.0366667	0.31	0.143333	6.748	2.755	9.48287e-06	5.90999e-05	up	3.046	1.607	0.00252925	0.00779236	up	8.556	3.097	3.61231e-05	0.000188945	up	3.873	1.953	0.00459714	0.0112902	up
g4062	LG1	29250292	29251368	-	--	1	0	0	1	1	0	24	27	17	10	7	18	0.00666667	0.0166667	0.563333	0.29	69.056	6.11	1.7752e-05	0.000104145	up	34.858	5.123	0.000895144	0.00309134	up	33.481	5.065	9.19862e-05	0.000440298	up	16.877	4.077	0.00479829	0.0117292	up
g40937	LG10	20429550	20431610	+	WD domain, G-beta repeat	483	366	439	502	637	617	4566	2733	3741	1437	912	1494	6.12	8.53667	51.9567	18.29	9.261	3.211	3.71935e-63	1.9076e-60	up	3.207	1.681	3.5525e-22	1.23988e-20	up	6.122	2.614	6.14622e-46	9.24144e-44	up	2.118	1.083	2.04758e-11	1.58486e-10	up
g40949	LG10	20540895	20546156	+	Phage tail sheath protein beta-sandwich domain	469	249	150	395	390	308	2098	2782	2113	664	730	975	3.12	4.08667	25.7333	8.77333	9.049	3.178	1.21638e-21	6.36096e-20	up	3.023	1.596	1.65818e-07	1.19515e-06	up	6.356	2.668	4.25938e-40	5.12351e-38	up	2.125	1.088	8.7047e-10	5.68142e-09	up
g4099	LG1	29490855	29493885	+	Patatin-like phospholipase	89	144	94	29	30	6	178	266	187	219	189	233	1.58333	0.326667	3.08333	3.14333	2.134	1.093	0.000921292	0.00353877	up	2.131	1.091	8.4534e-06	4.51242e-05	up	9.645	3.27	1.3849e-10	1.73145e-09	up	9.632	3.268	4.23769e-16	4.89962e-15	up
g41063	LG10	21562727	21566814	-	Peptidase family M20/M25/M40	97	55	47	41	53	21	181	327	190	250	188	239	0.866667	0.52	3.10333	3	3.931	1.975	5.05363e-07	4.07602e-06	up	3.717	1.894	1.10306e-11	1.40978e-10	up	6.038	2.594	2.62425e-09	2.77786e-08	up	5.726	2.517	4.84419e-15	5.14224e-14	up
g41117	LG10	22018316	22025492	-	gag-polyprotein putative aspartyl protease	0	0	0	0	3	0	11	9	22	30	25	32	0	0.00666667	0.07	0.14	84.414	6.399	9.16808e-05	0.000458576	up	170.943	7.417	2.97172e-08	2.39959e-07	up	13.711	3.777	0.0096226	0.0269676	up	28.075	4.811	1.10964e-05	4.37061e-05	up
g41239	LG10	22871217	22872192	+	Reverse transcriptase-like	0	0	0	0	0	0	23	5	5	0	9	15	0	0	0.336667	0.263333	61.643	5.946	0.00116047	0.00433429	up	47.803	5.579	0.00861734	0.0228354	up	55.778	5.802	0.00203251	0.00699379	up	43.128	5.431	0.0115626	0.025718	up
g41275	LG10	23183842	23190731	+	F-box-like	3	1	1	0	0	0	14	14	5	27	34	21	0.0233333	0	0.16	0.413333	7.198	2.848	0.0168772	0.0433304	up	18.227	4.188	3.56841e-06	2.04572e-05	up	58.253	5.864	0.00101529	0.00379455	up	148.176	7.211	2.26492e-07	1.1248e-06	up
g4138	LG1	29834421	29843740	+	--	51	40	30	9	11	12	254	70	257	101	96	128	0.496667	0.136667	2.38667	1.36333	5.217	2.383	9.55012e-07	7.31761e-06	up	2.935	1.553	7.21054e-07	4.66502e-06	up	17.659	4.142	5.03239e-14	9.40051e-13	up	9.941	3.313	1.60357e-15	1.77466e-14	up
g41387	LG11	272399	275137	-	--	0	0	0	22	37	21	117	78	87	105	49	62	0	0.62	2.1	1.62333	552.541	9.11	3.31055e-13	6.80569e-12	up	420.485	8.716	6.43923e-12	8.46182e-11	up	3.421	1.775	2.05723e-05	0.000113514	up	2.601	1.379	0.00232332	0.00608502	up
g41615	LG11	1799787	1802569	+	--	4	2	9	2	6	9	55	71	34	33	30	37	0.08	0.09	0.83	0.526667	11.484	3.522	6.64821e-07	5.24166e-06	up	7.143	2.837	3.21325e-05	0.000152	up	9.25	3.209	3.94277e-06	2.5154e-05	up	5.745	2.522	0.000256526	0.000809939	up
g41641	LG11	1954918	1960608	-	--	1	6	5	39	58	31	85	180	62	197	154	169	0.0766667	0.843333	2.10667	3.36	29.975	4.906	4.3901e-12	7.77106e-11	up	46.968	5.554	1.05272e-28	5.85014e-27	up	2.536	1.343	0.0099589	0.027767	up	3.96	1.986	1.84258e-10	1.29488e-09	up
g41673	LG11	2073698	2075188	-	NAD dependent epimerase/dehydratase family	50	27	23	12	18	15	82	50	122	82	95	90	0.49	0.23	1.26333	1.34667	2.821	1.496	0.00280026	0.00930436	up	2.952	1.562	3.79025e-05	0.000177101	up	5.576	2.479	2.49241e-06	1.64976e-05	up	5.847	2.548	8.64489e-10	5.64669e-09	up
g41700	LG11	2206380	2208591	+	Pyridine nucleotide-disulphide oxidoreductase	1268	1453	886	415	444	347	2172	2741	1810	2740	2519	2358	17.7767	6.13333	33.4833	38.4233	2.06	1.043	3.54081e-06	2.41724e-05	up	2.322	1.215	4.34563e-14	7.29435e-13	up	5.511	2.462	3.63348e-33	2.9375e-31	up	6.212	2.635	5.82939e-86	1.14449e-83	up
g41833	LG11	2895120	2898943	-	Cytochrome P450	6	4	4	2	0	7	358	241	553	28	12	24	0.0466667	0.03	3.91333	0.213333	90.838	6.505	2.25037e-34	2.82213e-32	up	4.906	2.294	0.0019589	0.00623013	up	127.778	6.997	3.92365e-28	2.36701e-26	up	6.91	2.789	0.00500632	0.0121736	up
g41902	LG11	3361903	3366011	+	SPRY domain	359	222	116	118	89	101	789	652	620	632	533	495	2.4	1.09667	7.19333	5.90333	3.274	1.711	1.20586e-07	1.08944e-06	up	2.643	1.402	2.76143e-06	1.61239e-05	up	6.581	2.718	1.24055e-53	2.73577e-51	up	5.311	2.409	2.30966e-37	8.94872e-36	up
g4192	LG2	18877	23791	-	zinc-binding in reverse transcriptase	10	11	11	6	2	6	90	60	82	252	152	187	0.0533333	0.0233333	0.386667	0.99	7.868	2.976	1.11685e-10	1.62118e-09	up	19.932	4.317	7.25348e-32	4.96795e-30	up	16.34	4.03	1.14347e-11	1.64935e-10	up	41.221	5.365	1.61159e-28	4.11585e-27	up
g4202	LG2	82574	83131	-	--	128	114	126	18	29	32	281	184	243	322	275	330	4.87	1.07	9.29667	12.3767	2.084	1.06	9.75825e-06	6.06461e-05	up	2.733	1.45	2.76394e-15	5.18945e-14	up	8.754	3.13	7.76158e-21	2.80087e-19	up	11.474	3.52	2.1993e-38	9.01735e-37	up
g42051	LG11	4381298	4386165	-	Phospholipase/Carboxylesterase	17	18	6	6	6	6	70	132	47	42	32	46	0.14	0.0633333	0.853333	0.413333	6.8	2.766	4.02301e-06	2.71767e-05	up	3.204	1.68	0.00152708	0.00498617	up	13.778	3.784	2.32901e-09	2.48322e-08	up	6.503	2.701	7.49884e-06	3.03078e-05	up
g42059	LG11	4419433	4420872	-	Purine nucleobase transmembrane transport	232	233	187	158	156	147	487	538	275	790	588	814	4.34	3.14667	8.63333	14.7467	2.176	1.122	3.78593e-05	0.000207191	up	3.646	1.866	3.20078e-36	2.68858e-34	up	2.768	1.469	8.29584e-08	7.04242e-07	up	4.637	2.213	3.25518e-47	1.88824e-45	up
g42060	LG11	4423795	4426142	-	--	642	672	655	556	510	605	1655	1976	1356	1504	1260	1651	13.24	11.45	33.54	29.9367	2.771	1.471	1.31933e-14	3.23208e-13	up	2.428	1.28	1.75668e-28	9.65498e-27	up	2.955	1.563	6.07295e-18	1.67221e-16	up	2.586	1.371	2.46025e-35	8.65368e-34	up
g42096	LG11	4635358	4637117	-	Domain of unknown function (DUF3552)	231	261	67	3	76	2	2435	1833	2645	588	470	575	4.30667	0.68	54.5433	12.9933	13.79	3.786	1.14551e-24	7.70188e-23	up	3.23	1.691	8.5404e-07	5.45581e-06	up	81.008	6.34	8.69165e-06	5.17031e-05	up	19.017	4.249	0.00273976	0.00706495	up
g42154	LG11	5035575	5036277	-	Zinc-ribbon, C4HC2 type	7	22	14	20	22	13	117	71	108	108	48	51	0.45	0.59	3.08667	2.17333	7.444	2.896	5.79036e-09	6.527e-08	up	5.159	2.367	1.0436e-05	5.47229e-05	up	5.264	2.396	3.0803e-08	2.78082e-07	up	3.644	1.865	0.000140128	0.000461821	up
g42158	LG11	5050465	5051207	-	Zinc-ribbon, C4HC2 type	5	6	2	0	3	1	22	19	21	43	10	17	0.123333	0.0433333	0.613333	0.686667	5.259	2.395	0.0025156	0.00848897	up	5.775	2.53	0.00255912	0.00787408	up	15.094	3.916	0.000462046	0.0018815	up	16.546	4.048	0.000332614	0.00102645	up
g42176	LG11	5155891	5158539	-	Multicopper oxidase	0	0	2	0	0	0	139	252	19	18	6	22	0.00666667	0	1.55667	0.176667	220.459	7.784	1.81521e-09	2.20924e-08	up	23.876	4.577	0.000994321	0.00339525	up	732.811	9.517	5.05538e-07	3.78772e-06	up	79.592	6.315	6.26652e-05	0.000218816	up
g42182	LG11	5185254	5187390	+	--	9	29	13	9	24	28	113	56	59	40	73	48	0.316667	0.393333	1.40333	1.04333	4.776	2.256	4.72402e-05	0.000252788	up	3.515	1.813	0.00119136	0.00398684	up	3.58	1.84	0.000786444	0.0030168	up	2.631	1.396	0.0114985	0.0255865	up
g42563	LG11	8090298	8092162	-	UDP-glucoronosyl and UDP-glucosyl transferase	113	111	148	105	89	158	393	430	322	309	275	339	1.77	1.69667	5.41333	4.41	3.343	1.741	8.99686e-12	1.52379e-10	up	2.679	1.421	4.41709e-11	5.19002e-10	up	3.22	1.687	5.10806e-10	5.92359e-09	up	2.575	1.365	6.70975e-09	3.98936e-08	up
g42577	LG11	8171584	8174349	-	S-adenosyl-L-methionine-dependent methyltransferase	4	8	13	50	40	31	254	469	64	57	131	186	0.163333	0.78	4.96667	2.41333	33.954	5.085	1.20659e-13	2.60777e-12	up	16.173	4.016	1.23502e-12	1.75598e-11	up	6.443	2.688	4.20455e-06	2.66783e-05	up	3.057	1.612	0.000254536	0.000804154	up
g42611	LG11	8384866	8389038	+	--	246	128	93	47	109	45	552	930	490	546	410	227	1.82333	0.823333	7.86333	4.76333	4.742	2.246	2.27559e-09	2.72805e-08	up	2.815	1.493	4.05492e-05	0.000188544	up	9.662	3.272	5.65153e-16	1.2945e-14	up	5.747	2.523	3.13593e-11	2.379e-10	up
g42698	LG11	8983378	8985405	-	SAM dependent carboxyl methyltransferase	4	4	0	0	2	0	36	114	36	72	22	123	0.04	0.01	0.936667	1.05667	26.51	4.728	1.33199e-07	1.19232e-06	up	28.974	4.857	2.15359e-09	2.05057e-08	up	93.077	6.54	2.36485e-07	1.867e-06	up	102.378	6.678	2.36668e-08	1.32172e-07	up
g42713	LG11	9070169	9072077	-	SAM dependent carboxyl methyltransferase	0	0	0	0	0	0	55	69	8	24	57	52	0	0	0.61	0.64	258.09	8.012	9.77566e-08	8.95934e-07	up	266.947	8.06	1.37982e-09	1.34974e-08	up	233.052	7.865	2.24497e-07	1.78086e-06	up	240.907	7.912	3.85967e-09	2.35329e-08	up
g42794	LG11	9641738	9643011	+	Lytic transglycolase	53	37	21	49	56	40	216	179	230	161	215	281	0.773333	1.04333	4.41	4.7	6.234	2.64	4.88799e-14	1.11485e-12	up	6.533	2.708	4.97769e-15	9.19083e-14	up	4.247	2.086	1.23906e-12	1.98966e-11	up	4.45	2.154	1.46415e-12	1.2593e-11	up
g42875	LG11	10165957	10167580	+	Serine hydrolase (FSH1)	47	22	60	53	59	96	3463	3198	2169	783	841	1284	1.13	1.83	75.5267	25.32	73.597	6.202	1.42613e-90	1.35839e-87	up	24.243	4.599	6.29235e-53	1.05931e-50	up	41.589	5.378	4.5509e-112	4.2011e-109	up	13.683	3.774	5.52575e-56	4.25765e-54	up
g4301	LG2	834727	836659	-	zinc-RING finger domain	113	93	87	82	62	105	359	159	313	357	201	391	1.22667	1.06	3.45	3.97667	3.069	1.618	4.20005e-07	3.43394e-06	up	3.482	1.8	3.01129e-13	4.57888e-12	up	3.263	1.706	7.69965e-07	5.59162e-06	up	3.696	1.886	2.52307e-12	2.12224e-11	up
g4316	LG2	953491	959170	+	Holliday junction DNA helicase RuvB P-loop domain	28	42	30	15	30	34	238	223	276	121	121	87	0.246667	0.203333	1.85333	0.84	8.094	3.017	9.37872e-23	5.39074e-21	up	3.611	1.853	1.07663e-07	7.97657e-07	up	9.207	3.203	7.70866e-19	2.30418e-17	up	4.106	2.038	5.25869e-07	2.49014e-06	up
g43207	LG11	12568577	12570853	+	Serine carboxypeptidase	13	12	27	22	25	36	55	124	67	76	61	68	0.25	0.393333	1.17	0.966667	5.189	2.375	3.91946e-05	0.000213738	up	4.225	2.079	5.40899e-06	2.99174e-05	up	2.978	1.574	0.00201159	0.00693265	up	2.42	1.275	0.00130039	0.00358569	up
g43247	LG11	12820798	12823876	+	--	960	873	604	620	770	675	1836	1996	1584	1616	1453	1506	12.14	10.63	27.2233	23.2933	2.452	1.294	7.7987e-12	1.33328e-10	up	2.061	1.043	2.94594e-12	4.01616e-11	up	2.583	1.369	7.86614e-16	1.77011e-14	up	2.171	1.119	3.15003e-18	4.29222e-17	up
g43250	LG11	12836078	12837723	-	--	1	0	2	1	4	1	27	23	18	12	11	18	0.0366667	0.0733333	0.79	0.486667	24.374	4.607	4.47196e-05	0.000240264	up	14.637	3.872	0.00119857	0.00400759	up	10.987	3.458	0.000396396	0.00163701	up	6.595	2.721	0.0111723	0.0249354	up
g43294	LG11	13130843	13131707	-	Lateral organ boundaries (LOB) domain	27	20	4	8	10	2	152	56	110	158	133	174	0.463333	0.193333	2.93333	4.40667	6.826	2.771	5.03425e-06	3.32884e-05	up	10.06	3.331	1.71917e-14	3.00927e-13	up	15.312	3.937	2.09062e-10	2.55423e-09	up	22.695	4.504	2.50498e-23	4.74031e-22	up
g43351	LG11	13550367	13551444	-	Peptidase of plants and bacteria	0	0	0	0	0	0	42	38	50	0	13	7	0	0	0.893333	0.143333	258.554	8.014	1.59529e-09	1.95586e-08	up	41.523	5.376	0.0146727	0.0362741	up	233.445	7.867	4.61552e-09	4.72564e-08	up	37.477	5.228	0.0193883	0.0408019	up
g43392	LG11	13798721	13802911	-	Phosphotransferase enzyme family	154	111	140	104	54	77	921	774	879	363	235	306	0.933333	0.55	5.90333	2.08667	6.933	2.793	4.98678e-47	1.32997e-44	up	2.409	1.268	4.99591e-09	4.54071e-08	up	10.855	3.44	1.70223e-52	3.55633e-50	up	3.768	1.914	6.38418e-14	6.17213e-13	up
g43395	LG11	13811703	13812871	-	Glutathione S-transferase, N-terminal domain	40	55	36	98	65	42	247	132	275	285	313	187	1.11333	1.78333	5.58333	6.87333	5.449	2.446	2.56177e-11	4.07165e-10	up	6.627	2.728	3.3548e-18	8.38531e-17	up	3.147	1.654	3.71478e-05	0.000193489	up	3.824	1.935	7.97244e-09	4.69663e-08	up
g43424	LG11	14022016	14023225	-	--	3	5	0	0	4	5	71	6	61	45	51	59	0.0633333	0.0733333	1.1	1.28	18.721	4.227	9.47473e-05	0.000472496	up	21.35	4.416	5.6171e-10	5.77734e-09	up	14.605	3.868	0.000419109	0.00172364	up	16.871	4.077	1.74412e-08	9.90642e-08	up
g4343	LG2	1139968	1144721	+	Kinase-like	8	2	15	11	19	37	730	36	631	1459	1081	1590	0.0966667	0.26	5.23667	15.8933	57.932	5.856	2.61054e-06	1.83928e-05	up	175.648	7.457	4.94994e-38	4.59096e-36	up	19.981	4.321	0.000106917	0.000504047	up	59.966	5.906	8.16843e-42	3.91519e-40	up
g43564	LG11	15078695	15079815	-	Peptidase of plants and bacteria	0	0	2	1	0	0	83	66	52	17	41	13	0.0133333	0.00666667	1.30667	0.486667	107.998	6.755	2.40739e-09	2.87057e-08	up	39.542	5.305	5.47647e-05	0.000247855	up	182.641	7.513	4.75687e-09	4.86033e-08	up	67.507	6.077	2.99696e-05	0.000110358	up
g43600	LG11	15294416	15295502	+	Peptidase of plants and bacteria	2	0	0	1	0	0	82	50	30	18	16	5	0.0133333	0.00666667	1.07333	0.27	86.963	6.442	7.89415e-08	7.34944e-07	up	21.873	4.451	0.00215745	0.00678194	up	144.985	7.18	8.3356e-08	7.07466e-07	up	36.159	5.176	0.0011488	0.0032023	up
g43692	LG11	16000009	16001492	+	No apical meristem (NAM) protein	67	40	27	92	79	87	340	162	288	305	286	443	0.76	1.51333	4.49333	5.99333	6.442	2.688	2.35418e-12	4.35208e-11	up	8.444	3.078	6.89998e-25	3.02474e-23	up	2.988	1.579	1.80785e-07	1.45623e-06	up	3.919	1.97	1.50182e-18	2.09747e-17	up
g43698	LG11	16052019	16052531	-	zinc-binding in reverse transcriptase	220	175	124	255	185	195	402	455	572	519	484	743	7.38667	9.28333	20.7533	25.2933	3.072	1.619	4.48895e-09	5.14557e-08	up	3.672	1.877	9.0563e-18	2.18458e-16	up	2.252	1.171	2.47458e-06	1.63878e-05	up	2.693	1.429	8.4264e-14	8.07767e-13	up
g43752	LG11	16472701	16473421	-	HSP20-like domain found in ArsA	20	7	6	8	2	14	410	471	264	71	52	105	0.333333	0.246667	11.6633	2.33667	38.255	5.258	5.78036e-34	7.11518e-32	up	7.518	2.91	2.7356e-08	2.22159e-07	up	47.242	5.562	1.60394e-33	1.3162e-31	up	9.274	3.213	2.52011e-08	1.40324e-07	up
g43753	LG11	16473866	16475977	+	--	2	8	7	0	0	0	168	293	144	26	40	52	0.15	0	5.36333	1.05667	39.108	5.289	1.91082e-21	9.8003e-20	up	7.529	2.913	1.16011e-05	6.02801e-05	up	1093.28	10.094	8.7963e-16	1.97271e-14	up	210.826	7.72	8.60059e-09	5.05501e-08	up
g43835	LG11	17116067	17120670	-	Phosphotransferase enzyme family	49	29	36	24	20	21	91	92	134	473	374	490	0.303333	0.176667	0.856667	3.6	3.078	1.622	4.39924e-05	0.000236739	up	12.727	3.67	4.16551e-58	8.55895e-56	up	4.866	2.283	3.04378e-08	2.74909e-07	up	20.116	4.33	1.12832e-66	1.25209e-64	up
g43839	LG11	17143359	17149757	-	Leucine Rich repeat	27	52	29	35	21	21	295	678	392	1221	693	1276	0.193333	0.14	2.48333	5.70667	14.148	3.822	4.07349e-20	1.83101e-18	up	31.719	4.987	1.23258e-79	5.03938e-77	up	17.936	4.165	2.07213e-24	1.00677e-22	up	40.165	5.328	8.11265e-97	2.0706e-94	up
g43840	LG11	17150917	17159527	-	FAR1 DNA-binding domain	16	7	10	29	24	14	92	24	70	43	53	55	0.113333	0.236667	0.63	0.526667	6.045	2.596	4.85879e-05	0.000259064	up	5.025	2.329	3.97504e-06	2.25528e-05	up	2.681	1.423	0.0174982	0.044795	up	2.226	1.155	0.0143414	0.0311355	up
g43843	LG11	17175026	17178777	-	Phosphotransferase enzyme family	19	11	7	14	9	12	44	69	24	125	88	116	0.0833333	0.0866667	0.32	0.773333	4.115	2.041	0.00164718	0.00587827	up	9.696	3.277	9.14805e-16	1.7985e-14	up	3.889	1.959	0.00181249	0.00631778	up	9.192	3.2	2.92394e-15	3.16641e-14	up
g43908	LG11	17626940	17630557	-	AP2 domain	2	4	4	1	6	7	39	52	28	13	37	24	0.0833333	0.116667	0.976667	0.626667	12.983	3.699	5.99285e-07	4.77103e-06	up	8.233	3.041	0.000224993	0.000894325	up	8.349	3.062	8.12454e-05	0.00039301	up	5.299	2.406	0.00519163	0.0125815	up
g44017	LG11	18553235	18556249	+	Anaphase-promoting complex subunit 4 WD40 domain	1	0	2	0	0	0	23	8	10	23	19	24	0.0133333	0	0.176667	0.3	14.257	3.834	0.00342136	0.0110702	up	23.7	4.567	2.2321e-05	0.000109212	up	70.898	6.148	0.000284247	0.00121429	up	117.013	6.871	1.42385e-06	6.35821e-06	up
g4436	LG2	1730010	1730674	+	--	1	0	4	0	0	2	9	14	16	38	20	34	0.0566667	0.0233333	0.44	1.01667	8.455	3.08	0.0132268	0.0353466	up	19.453	4.282	3.28193e-06	1.89259e-05	up	19.663	4.297	0.00466645	0.0144399	up	44.609	5.479	8.78972e-06	3.51839e-05	up
g44380	LG11	21705713	21708092	+	3'-5' exonuclease	14	35	8	30	18	15	51	40	80	64	87	70	0.263333	0.303333	0.823333	1.07667	3.348	1.743	0.00613876	0.0184135	up	4.32	2.111	5.44899e-05	0.000246778	up	2.713	1.44	0.0074681	0.0217113	up	3.499	1.807	4.39782e-05	0.000157235	up
g44417	LG11	21989642	21993457	+	--	1	1	0	0	0	0	9	7	9	14	12	21	0.00666667	0	0.103333	0.193333	13.816	3.788	0.0126705	0.0341037	up	25.578	4.677	0.000329714	0.00126393	up	44.635	5.48	0.00332486	0.0107528	up	82.916	6.374	2.94902e-05	0.0001087	up
g44554	LG11	22897394	22906560	+	GAG-pre-integrase domain	2	2	1	9	1	5	55	83	31	89	32	63	0.01	0.04	0.41	0.446667	37.216	5.218	2.63461e-09	3.12012e-08	up	39.363	5.299	8.42376e-11	9.59121e-10	up	11.288	3.497	4.96656e-06	3.10566e-05	up	11.91	3.574	1.06759e-07	5.52211e-07	up
g44826	LG11	24960604	24966685	+	--	18	14	3	16	24	19	123	171	162	51	51	52	0.156667	0.276667	2.10333	0.713333	14.677	3.875	2.8144e-14	6.59966e-13	up	4.889	2.289	4.32718e-05	0.000200089	up	7.692	2.943	1.26269e-13	2.26491e-12	up	2.56	1.356	0.00266709	0.00689167	up
g44831	LG11	24995004	24996407	+	Survival protein SurE	105	44	26	53	101	44	405	566	648	180	184	158	0.966667	1.15333	9.27333	3	10.505	3.393	4.88166e-15	1.25428e-13	up	3.333	1.737	2.6933e-05	0.000129283	up	8.12	3.022	4.02421e-16	9.36349e-15	up	2.582	1.368	8.14774e-05	0.000279323	up
g44833	LG11	25002987	25004519	-	Survival protein SurE	41	23	12	24	54	14	279	529	258	119	87	80	0.436667	0.556667	6.28667	1.69	15.804	3.982	1.83473e-18	6.91783e-17	up	4.153	2.054	2.07315e-06	1.24156e-05	up	11.435	3.515	1.65366e-12	2.61523e-11	up	3.012	1.591	0.000997099	0.00281653	up
g44834	LG11	25015544	25017992	+	Survival protein SurE	229	181	86	129	320	128	2128	1855	2146	438	565	890	2.64	3.24333	33.2167	10.37	13.728	3.779	7.25103e-43	1.47999e-40	up	4.21	2.074	5.26511e-11	6.14319e-10	up	10.341	3.37	3.91251e-24	1.85552e-22	up	3.171	1.665	0.00250457	0.00651459	up
g45083	LG11	26977615	26989512	+	Reverse transcriptase (RNA-dependent DNA polymerase)	48	40	74	38	34	27	108	100	95	139	145	145	0.296667	0.18	0.54	0.78	2.018	1.013	0.0073709	0.0215582	up	2.864	1.518	2.81344e-06	1.63989e-05	up	3.017	1.593	4.36757e-06	2.762e-05	up	4.272	2.095	1.22e-11	9.65338e-11	up
g45088	LG11	27009813	27023803	-	--	39	29	40	38	38	44	167	96	185	91	109	114	0.223333	0.253333	0.926667	0.663333	4.506	2.172	1.20214e-08	1.28759e-07	up	3.172	1.665	4.18253e-07	2.82313e-06	up	3.673	1.877	3.07862e-07	2.3845e-06	up	2.582	1.369	2.6736e-05	9.92382e-05	up
g45286	LG11	28375080	28378690	+	3-hydroxyacyl-CoA dehydrogenase, C-terminal domain	1	6	4	28	10	8	121	180	95	55	83	92	0.06	0.25	2.15	1.26667	39.481	5.303	1.90934e-17	6.4404e-16	up	22.862	4.515	3.32965e-13	5.04381e-12	up	8.627	3.109	7.73044e-09	7.65618e-08	up	4.988	2.319	1.12755e-05	4.43557e-05	up
g45357	LG11	28818530	28821067	-	Fructose-bisphosphate aldolase class-I	683	412	735	692	2238	641	4276	3605	4903	3345	3519	3228	8.91	17.9733	61.95	49.6	7.609	2.928	2.56472e-31	2.67192e-29	up	6.001	2.585	1.12762e-34	8.7729e-33	up	3.474	1.797	0.00464452	0.0143856	up	2.742	1.455	0.0199702	0.0418583	up
g45359	LG11	28830662	28839050	+	MULE transposase domain	6	8	10	27	21	30	62	60	48	105	42	67	0.0833333	0.26	0.553333	0.7	7.677	2.941	3.72598e-08	3.66596e-07	up	9.488	3.246	8.14614e-10	8.19461e-09	up	2.15	1.104	0.00910024	0.0257124	up	2.655	1.408	0.00138684	0.00380608	up
g45419	LG11	29292211	29295053	-	Domain of unknown function DUF223	38	33	17	140	202	149	443	439	360	461	362	392	0.366667	2.13667	5.25667	5.2	15.535	3.957	2.39124e-42	4.75927e-40	up	15.101	3.917	1.78007e-52	2.92304e-50	up	2.48	1.31	2.88862e-08	2.61969e-07	up	2.414	1.271	7.94253e-10	5.20708e-09	up
g45420	LG11	29295878	29299226	+	Iron-sulphur cluster biosynthesis	266	347	234	245	279	322	750	667	577	773	562	733	9.10667	9.35	21.4533	22.5133	2.569	1.361	1.43749e-12	2.74888e-11	up	2.649	1.405	1.19683e-16	2.59768e-15	up	2.313	1.21	9.3947e-12	1.36452e-10	up	2.383	1.253	1.85104e-15	2.04079e-14	up
g45552	LG11	30229789	30231235	-	U-box domain	18	14	2	10	12	3	52	66	18	128	83	16	0.203333	0.16	0.823333	1.42	4.453	2.155	0.00669708	0.0198457	up	7.505	2.908	0.000142801	0.000591075	up	5.306	2.408	0.00157913	0.00559926	up	8.953	3.162	1.43903e-05	5.56388e-05	up
g45671	LG11	31306964	31312244	-	--	46	56	39	55	36	34	97	99	128	125	76	102	0.86	0.78	2	1.86333	2.539	1.344	0.00011873	0.000578748	up	2.325	1.218	9.19223e-05	0.000398125	up	2.587	1.371	0.000266862	0.0011473	up	2.367	1.243	0.000331257	0.0010228	up
g4569	LG2	2587354	2589085	-	HSF-type DNA-binding	1	0	0	0	0	0	12	2	11	25	31	19	0.00333333	0	0.113333	0.343333	24.909	4.639	0.0109286	0.0300956	up	77.062	6.268	4.52066e-06	2.53967e-05	up	43.841	5.454	0.00654093	0.0193777	up	135.5	7.082	5.14175e-07	2.4373e-06	up
g45851	LG11	32823321	32825326	+	Cytochrome P450	111	97	46	59	123	87	185	531	164	260	165	168	0.916667	1.02	3.28	2.19333	3.931	1.975	9.26123e-05	0.00046283	up	2.562	1.357	2.45027e-05	0.000118626	up	3.266	1.707	0.000672864	0.00261933	up	2.137	1.095	0.000624769	0.00183565	up
g45859	LG11	32943312	32946407	+	Pectinacetylesterase	0	0	0	2	8	5	38	46	28	108	57	124	0	0.0833333	0.603333	1.55333	222.02	7.795	9.39671e-09	1.02068e-07	up	560.035	9.129	2.73367e-13	4.18053e-12	up	7.306	2.869	9.65283e-05	0.000460042	up	18.483	4.208	1.3011e-13	1.22822e-12	up
g45983	LG11	34145314	34147159	+	--	96	85	68	82	54	82	191	114	175	122	171	221	0.986667	0.883333	1.90667	2.08333	2.101	1.071	0.00028157	0.00124535	up	2.264	1.179	5.59275e-05	0.000252632	up	2.166	1.115	0.000440118	0.00180071	up	2.332	1.221	8.04924e-05	0.000276201	up
g45984	LG11	34147460	34157189	-	Fungal protein kinase	51	36	32	42	39	21	140	183	85	195	151	146	0.166667	0.143333	0.566667	0.693333	3.771	1.915	1.90551e-06	1.38048e-05	up	4.518	2.176	5.64328e-14	9.3627e-13	up	3.943	1.979	7.58551e-06	4.58166e-05	up	4.73	2.242	1.48351e-11	1.16415e-10	up
g46097	LG11	35019229	35024408	+	GAG-pre-integrase domain	27	23	30	13	0	4	37	193	28	96	108	73	0.133333	0.0266667	0.44	0.466667	3.624	1.857	0.0119258	0.0324194	up	3.799	1.926	2.85587e-07	1.9814e-06	up	15.796	3.981	0.000105	0.000495773	up	16.429	4.038	3.01904e-10	2.07837e-09	up
g46166	LG11	35607633	35611318	+	--	39	25	29	10	19	2	84	48	97	45	86	101	0.643333	0.223333	1.59333	1.64667	2.692	1.429	0.00125162	0.00462722	up	2.745	1.457	0.000754355	0.00265292	up	7.189	2.846	4.4603e-05	0.000228336	up	7.341	2.876	4.76329e-06	1.97883e-05	up
g46174	LG11	35662480	35666551	-	GDSL-like Lipase/Acylhydrolase	67	74	86	91	79	120	1969	1711	1645	1356	1326	1514	1.04	1.34	24.1067	19.3067	25.468	4.671	2.1152e-149	5.2887e-146	up	20.078	4.328	2.7916e-146	4.6604e-143	up	18.086	4.177	4.4702e-134	5.9148e-131	up	14.237	3.832	1.8478e-128	7.6999e-126	up
g46193	LG11	35803264	35808655	-	Transmembrane alpha-helix domain	6	0	5	10	14	4	144	54	93	52	64	64	0.04	0.1	0.986667	0.633333	28.166	4.816	9.03108e-12	1.52829e-10	up	17.893	4.161	2.22797e-10	2.4094e-09	up	9.969	3.317	1.381e-08	1.31083e-07	up	6.323	2.661	1.19594e-06	5.40188e-06	up
g46213	LG11	35950150	35953806	+	RING-H2 zinc finger domain	12	2	20	0	4	0	103	20	88	33	53	43	0.31	0.0366667	1.83333	1.17	6.498	2.7	0.000928574	0.00356503	up	4.116	2.041	0.00305678	0.00920578	up	50.089	5.646	2.05138e-07	1.64007e-06	up	31.789	4.99	2.3838e-07	1.18083e-06	up
g46219	LG11	35985738	35989677	-	GDSL-like Lipase/Acylhydrolase	49	96	71	98	112	121	4139	4027	3043	5746	5750	5034	1.04667	1.63667	53.9533	81.2733	56.367	5.817	5.8255e-131	1.0133e-127	up	83.641	6.386	7.346e-221	3.2703e-217	up	33.266	5.056	7.9915e-195	2.6435e-191	up	49.301	5.624	0	0	up
g46338	LG11	36790988	36792811	-	Root cap	18	17	5	2	16	10	51	18	68	26	41	36	0.273333	0.203333	0.96	0.74	3.799	1.926	0.00660527	0.0196172	up	2.881	1.527	0.0103325	0.0267248	up	4.742	2.245	0.00662695	0.0195902	up	3.61	1.852	0.00978211	0.0221155	up
g46346	LG11	36831419	36832722	+	Domain of unknown function (DUF4408)	79	107	102	17	28	20	329	220	146	350	153	158	1.63333	0.376667	3.85333	3.74333	2.572	1.363	2.43668e-05	0.000138642	up	2.457	1.297	0.000113811	0.000481682	up	10.289	3.363	5.66706e-18	1.56435e-16	up	9.817	3.295	4.12008e-17	5.15951e-16	up
g46375	LG11	37026426	37034372	+	Haspin like kinase domain	31	40	30	37	97	96	343	186	334	175	238	122	0.26	0.62	2.24	1.44	9.28	3.214	3.51653e-22	1.9166e-20	up	5.891	2.558	2.01342e-12	2.80305e-11	up	3.645	1.866	5.43605e-06	3.37374e-05	up	2.314	1.21	0.00281329	0.00723305	up
g46379	LG11	37056926	37063897	+	Domain of unknown function (DUF4283)	0	3	0	0	0	0	81	171	82	188	180	235	0.00333333	0	0.57	1.03	124.281	6.957	3.07174e-12	5.58315e-11	up	218.749	7.773	6.31851e-19	1.6788e-17	up	606.838	9.245	1.0136e-12	1.64493e-11	up	1070.78	10.064	9.12762e-17	1.11168e-15	up
g46464	LG11	37643424	37648204	+	Cellulase (glycosyl hydrolase family 5)	357	327	102	427	387	241	599	868	843	891	1313	2122	3.51667	4.92667	10.6967	20.0233	3.33	1.736	8.95217e-06	5.61345e-05	up	6.107	2.611	8.94026e-06	4.74827e-05	up	2.191	1.132	5.86773e-05	0.000293202	up	4.019	2.007	2.88264e-06	1.23459e-05	up
g46466	LG11	37659234	37664391	+	Cellulase (glycosyl hydrolase family 5)	1757	1596	488	2101	1331	891	2499	4872	4313	3799	5874	8616	17.1367	20.0367	54.31	84.64	3.478	1.798	0.00268278	0.00896764	up	5.302	2.407	4.30773e-05	0.000199305	up	2.739	1.454	0.00173201	0.00607189	up	4.179	2.063	7.33727e-06	2.96933e-05	up
g4656	LG2	3288123	3291084	+	Transposase DDE domain	2	4	1	0	0	0	172	116	139	142	124	164	0.0366667	0	2.11333	2.16667	66.315	6.051	6.08545e-21	2.99445e-19	up	66.802	6.062	1.16631e-22	4.22899e-21	up	757.229	9.565	8.7554e-15	1.76778e-13	up	762.41	9.574	4.32312e-15	4.61551e-14	up
g4658	LG2	3307903	3315253	+	C2H2 zinc-finger	46	44	31	33	31	31	89	123	52	102	84	91	0.353333	0.286667	0.776667	0.823333	2.402	1.264	0.00402061	0.0127432	up	2.501	1.322	2.02092e-05	9.97686e-05	up	2.745	1.457	0.00119324	0.004378	up	2.86	1.516	6.64881e-06	2.70624e-05	up
g4659	LG2	3316113	3320651	+	Transposase DDE domain	2	0	0	6	0	0	296	323	299	304	226	264	0.01	0.03	4.92	4.28	505.177	8.981	1.78388e-17	6.05292e-16	up	431.248	8.752	5.97088e-17	1.33875e-15	up	154.905	7.275	2.20292e-09	2.3551e-08	up	131.927	7.044	4.70302e-09	2.84151e-08	up
g46650	LG11	38788326	38789194	+	--	3632	1033	5141	587	627	734	48051	33859	50455	53346	54660	50039	84.9267	16.8833	1122	1363.42	14.459	3.854	6.45758e-11	9.66101e-10	up	17.328	4.115	7.84076e-13	1.13825e-11	up	66.895	6.064	1.5237e-275	1.2097e-271	up	80.093	6.324	0	0	up
g46656	LG11	38840799	38841691	+	Trypsin and protease inhibitor	505	198	622	2726	1313	1813	8750	5595	8232	7100	10582	11491	11.1	48.88	185.543	245.57	18.279	4.192	1.45871e-32	1.61204e-30	up	23.866	4.577	3.33136e-17	7.66233e-16	up	3.817	1.933	2.52572e-16	6.00428e-15	up	4.977	2.315	1.34301e-10	9.58819e-10	up
g46657	LG11	38847139	38853112	+	Trypsin and protease inhibitor	3109	1425	5791	39706	40533	38964	167084	174090	149794	173238	217942	140919	65.8533	757.74	3055.62	3393.99	50.838	5.668	6.61946e-22	3.51209e-20	up	55.704	5.8	7.50946e-20	2.15377e-18	up	4.066	2.024	7.54981e-71	2.606e-68	up	4.452	2.154	3.59315e-16	4.18163e-15	up
g46661	LG11	38887752	38891244	-	Trypsin and protease inhibitor	2148	1118	3688	16156	15105	15146	59221	60453	54298	66969	81028	78874	47.11	313.987	1154	1532.08	26.83	4.746	7.46637e-20	3.25373e-18	up	35.068	5.132	6.1277e-22	2.09308e-20	up	3.705	1.89	3.02575e-74	1.18918e-71	up	4.839	2.275	1.05559e-91	2.33011e-89	up
g46662	LG11	38897000	38897864	-	Trypsin and protease inhibitor	986	209	1566	11028	10186	8222	34497	42797	33612	58541	46545	31786	24.1333	256.16	949.257	1184.72	43.203	5.433	4.50998e-12	7.96213e-11	up	53.021	5.728	2.25725e-16	4.75755e-15	up	3.74	1.903	1.92337e-28	1.18922e-26	up	4.587	2.198	2.52056e-15	2.74706e-14	up
g46666	LG11	38916768	38922344	-	Trypsin and protease inhibitor	4327	2273	7302	40406	39792	41903	184129	137018	150268	275362	363152	253768	101.53	891.433	3350.52	6540.03	36.075	5.173	1.60803e-24	1.07215e-22	up	69.59	6.121	6.88397e-28	3.63879e-26	up	3.784	1.92	1.10623e-94	7.31862e-92	up	7.289	2.866	7.25146e-31	2.07663e-29	up
g46667	LG11	38927609	38929019	+	--	562	269	1030	3852	3534	3384	23668	22204	25114	27675	24307	22786	9.96333	57.4233	371.81	396.11	40.875	5.353	9.42159e-21	4.57416e-19	up	42.864	5.422	2.24913e-21	7.32651e-20	up	6.525	2.706	3.277e-111	2.9563e-108	up	6.835	2.773	4.5462e-177	3.8677e-174	up
g46673	LG11	38952421	38959894	-	Trypsin and protease inhibitor	2008	631	2977	10022	11025	10145	109614	85277	106089	87996	117047	90025	40.7067	226.377	2132.02	2143.38	57.337	5.841	1.44991e-24	9.71588e-23	up	56.912	5.831	4.62138e-22	1.59076e-20	up	9.483	3.245	7.4069e-146	1.1308e-142	up	9.405	3.233	3.13336e-43	1.60146e-41	up
g46674	LG11	38979264	38996651	-	Reverse transcriptase (RNA-dependent DNA polymerase)	10967	8524	15436	77115	78338	81392	349765	308538	294831	343100	390775	389592	59.26	405.427	1592.4	1915.44	29.377	4.877	6.14213e-97	6.46621e-94	up	34.806	5.121	5.81492e-56	1.131e-53	up	3.957	1.984	1.3729e-123	1.4342e-120	up	4.684	2.228	4.2701e-105	1.2194e-102	up
g46695	LG11	39116476	39117635	+	Phosphate-induced protein 1 conserved region	900	777	558	536	719	781	1301	1887	1598	1354	1289	2240	14.0833	13.2533	30.7267	31.2367	2.391	1.257	1.07126e-07	9.74879e-07	up	2.378	1.25	1.07066e-09	1.06026e-08	up	2.341	1.227	1.79962e-07	1.45048e-06	up	2.33	1.22	4.19687e-10	2.84036e-09	up
g46732	LG11	39355603	39356377	+	Cysteine-rich secretory protein family	7	0	0	5	13	10	18	49	32	43	113	158	0.0633333	0.276667	0.96	3.04667	16.395	4.035	0.000532083	0.00218819	up	51.104	5.675	0.000467694	0.00173221	up	3.546	1.826	0.0137079	0.0364603	up	11.024	3.463	1.66072e-09	1.05391e-08	up
g46840	LG11	39988098	39992480	-	AP-3 complex subunit delta-1	3	7	0	0	1	1	74	35	41	46	38	66	0.0533333	0.0133333	0.806667	0.826667	16.251	4.022	7.23945e-07	5.67168e-06	up	16.379	4.034	1.86715e-08	1.55791e-07	up	72.201	6.174	1.87213e-07	1.50525e-06	up	72.886	6.188	7.35625e-08	3.87422e-07	up
g46878	LG11	40186550	40189070	-	--	26098	11001	40522	276895	299033	294740	1266948	816194	1013924	959427	1116963	1002664	522.983	5874.85	20270.7	20712.9	42.357	5.405	2.57581e-24	1.69482e-22	up	42.737	5.417	7.61454e-24	3.03574e-22	up	3.471	1.795	1.61731e-41	2.06428e-39	up	3.498	1.806	6.83135e-56	5.25371e-54	up
g46883	LG11	40218666	40219667	-	--	113	73	14	36	58	23	91	182	315	107	104	285	1.85	1.14667	5.77333	4.72333	3.421	1.774	0.00626858	0.0187397	up	2.729	1.449	0.0103151	0.0266833	up	5.076	2.344	1.69901e-05	9.54323e-05	up	4.064	2.023	7.68659e-06	3.099e-05	up
g46886	LG11	40236152	40237094	+	Trypsin and protease inhibitor	148	102	42	7	6	1	97	270	256	149	129	292	2.23667	0.11	5.00667	4.46333	2.458	1.298	0.0124265	0.0335576	up	2.137	1.095	0.00775892	0.0208432	up	45.275	5.501	3.01492e-17	7.81693e-16	up	39.437	5.301	6.28526e-23	1.16193e-21	up
g46918	LG12	13526	17135	+	Zinc-binding dehydrogenase	4	6	0	2	4	8	21	36	31	21	31	28	0.06	0.09	0.563333	0.513333	9.974	3.318	0.000263178	0.00117269	up	8.951	3.162	0.00014152	0.000586441	up	6.295	2.654	0.000966743	0.00363055	up	5.666	2.502	0.00110311	0.00308589	up
g46960	LG12	390403	398066	+	--	1	5	8	11	6	14	60	35	77	40	49	49	0.09	0.193333	1.04667	0.856667	13.212	3.724	3.5324e-07	2.93364e-06	up	10.65	3.413	2.06215e-07	1.46809e-06	up	5.508	2.461	3.44998e-05	0.000181243	up	4.418	2.143	8.88092e-05	0.000302704	up
g47060	LG12	1140787	1144405	+	Leucine Rich Repeat	4	6	1	0	0	3	30	15	25	30	23	33	0.0333333	0.01	0.21	0.263333	6.96	2.799	0.00109036	0.00410193	up	8.543	3.095	2.59029e-05	0.000124787	up	22.831	4.513	0.000295191	0.00125752	up	28.03	4.809	1.26248e-05	4.92464e-05	up
g47115	LG12	1553878	1557267	+	Cytosol aminopeptidase family, N-terminal domain	529	539	300	455	362	235	746	765	1062	633	868	1289	5.65333	4.48333	10.8633	11.82	2.099	1.07	6.65109e-05	0.000343458	up	2.243	1.165	7.58356e-06	4.08841e-05	up	2.441	1.288	4.01718e-06	2.55917e-05	up	2.607	1.382	7.24126e-08	3.81756e-07	up
g47159	LG12	1871718	1872580	-	--	730	545	267	435	438	434	1266	1753	1535	1648	867	1290	12.95	11.4033	39.27	32.5333	3.325	1.733	3.37978e-08	3.35421e-07	up	2.694	1.43	2.2208e-07	1.57265e-06	up	3.476	1.797	2.29538e-19	7.18573e-18	up	2.819	1.495	7.10978e-19	1.01589e-17	up
g47172	LG12	1975497	1976707	-	Gibberellin regulated protein	109	86	77	17	34	60	2807	3236	3479	487	259	623	3.64667	1.53333	129.353	18.3833	38.783	5.277	3.2679e-138	6.5367e-135	up	5.395	2.432	7.82741e-19	2.07147e-17	up	85.233	6.413	4.74653e-90	2.77079e-87	up	11.844	3.566	1.78345e-22	3.19854e-21	up
g47201	LG12	2188541	2193308	-	POT family	230	193	166	175	271	182	669	708	481	938	437	691	2.06667	2.27667	6.53	7.27333	3.456	1.789	1.06832e-16	3.31304e-15	up	3.774	1.916	4.72578e-17	1.06916e-15	up	2.894	1.533	2.88075e-09	3.03642e-08	up	3.16	1.66	1.68527e-11	1.31514e-10	up
g47418	LG12	3766860	3784719	-	TIR domain	0	1	0	0	1	2	6	23	23	50	26	39	0.00333333	0.00666667	0.0966667	0.203333	54.875	5.778	0.00024525	0.00110325	up	114.961	6.845	1.66308e-07	1.19846e-06	up	17.662	4.143	0.00184878	0.00643127	up	37.108	5.214	4.08403e-07	1.95844e-06	up
g47448	LG12	3972852	3973366	-	--	349	498	296	799	706	593	2053	2109	1465	1379	1682	1889	16.2467	30.6467	80.23	72.0233	5.389	2.43	1.53086e-27	1.26013e-25	up	4.757	2.25	1.29203e-29	7.70352e-28	up	2.64	1.401	1.04294e-14	2.09299e-13	up	2.328	1.219	9.50716e-15	9.85891e-14	up
g47515	LG12	4429147	4431619	+	FBD	7	4	3	9	7	6	44	54	70	51	36	65	0.07	0.113333	0.87	0.78	13.396	3.744	5.98333e-09	6.72368e-08	up	11.76	3.556	3.08473e-09	2.88304e-08	up	7.647	2.935	5.34149e-07	3.98553e-06	up	6.718	2.748	8.96446e-07	4.12208e-06	up
g47621	LG12	5200734	5201916	-	Mitochondrial glycoprotein	17	23	21	10	21	7	51	41	51	40	44	57	0.51	0.33	1.19333	1.19333	2.552	1.352	0.00318279	0.0103953	up	2.51	1.328	0.00234672	0.0072979	up	3.672	1.877	0.00177577	0.00620014	up	3.611	1.852	0.0010892	0.00305072	up
g47660	LG12	5580850	5581838	+	NUDIX domain	2	0	0	0	7	0	28	30	25	24	13	14	0.02	0.0766667	0.833333	0.513333	45.911	5.521	1.17668e-05	7.18565e-05	up	27.851	4.8	0.000289245	0.00112342	up	11.384	3.509	0.00359243	0.0115011	up	6.9	2.787	0.0224621	0.0463907	up
g47667	LG12	5609418	5610055	-	--	34	9	10	5	70	22	147	287	35	161	126	81	0.6	1.17667	5.41	4.31667	9.896	3.307	6.21937e-06	4.02794e-05	up	7.706	2.946	4.87201e-09	4.43476e-08	up	4.664	2.222	0.00887552	0.0251689	up	3.657	1.871	0.00320629	0.00814781	up
g47673	LG12	5653341	5656625	-	Integrase zinc binding domain	6	9	3	4	6	0	45	9	48	27	25	11	0.0533333	0.0333333	0.303333	0.196667	6.171	2.625	0.00182174	0.00641877	up	3.892	1.96	0.0102246	0.0264711	up	9.845	3.299	0.00169941	0.00597131	up	6.218	2.637	0.00685197	0.0161183	up
g47683	LG12	5727086	5729897	-	--	0	2	1	2	0	0	55	30	72	51	49	56	0.0166667	0.01	0.93	0.933333	57.142	5.836	1.78601e-08	1.86017e-07	up	56.591	5.822	9.58944e-10	9.5411e-09	up	77.998	6.285	2.49592e-07	1.96154e-06	up	76.905	6.265	4.37864e-08	2.36741e-07	up
g47695	LG12	5827742	5828642	+	Mediator complex subunit MED14	15	16	6	12	12	4	141	64	122	101	83	117	0.296667	0.233333	2.64667	2.48333	9.638	3.269	7.3652e-11	1.09533e-09	up	8.881	3.151	2.67757e-14	4.59452e-13	up	11.362	3.506	1.39661e-10	1.74444e-09	up	10.485	3.39	2.8507e-13	2.6026e-12	up
g47727	LG12	6074011	6077335	+	Putative gypsy type transposon	15	0	10	6	0	1	151	202	182	286	124	201	0.08	0.0233333	1.72333	1.94333	23.667	4.565	2.27052e-13	4.7556e-12	up	26.113	4.707	2.44508e-05	0.000118418	up	76.73	6.262	3.37466e-20	1.14298e-18	up	84.693	6.404	1.10958e-22	2.01835e-21	up
g47729	LG12	6081261	6089817	+	Putative gypsy type transposon	4	0	0	0	4	3	14	44	20	55	40	35	0.0133333	0.0266667	0.296667	0.486667	22.428	4.487	0.000281271	0.0012443	up	35.767	5.161	2.87668e-08	2.32895e-07	up	11.137	3.477	0.00112069	0.00414363	up	18.1	4.178	1.65565e-07	8.35954e-07	up
g47749	LG12	6263964	6266954	+	--	4	21	3	1	2	0	66	9	61	39	38	68	0.0966667	0.01	0.48	0.523333	5.258	2.394	0.0106446	0.0294189	up	5.655	2.499	0.000345518	0.00131884	up	43.557	5.445	6.1066e-06	3.75816e-05	up	46.978	5.554	2.89821e-08	1.6022e-07	up
g47756	LG12	6303190	6306899	-	Prolyl oligopeptidase family	27	2	24	2	10	0	38	135	39	69	42	70	0.22	0.05	0.896667	0.753333	4.462	2.158	0.0108681	0.0299621	up	3.648	1.867	0.00460185	0.0131815	up	17.502	4.129	2.71147e-05	0.00014604	up	14.408	3.849	2.6278e-07	1.29338e-06	up
g47804	LG12	6704756	6709942	+	Serine carboxypeptidase	60	50	48	9	12	15	249	467	255	164	196	220	0.666667	0.153333	4.16	2.49667	6.833	2.773	6.36429e-15	1.61346e-13	up	4.018	2.007	2.05219e-14	3.56636e-13	up	26.962	4.753	9.69876e-28	5.75474e-26	up	15.871	3.988	2.64805e-27	6.28711e-26	up
g4787	LG2	4051045	4054469	+	Ankyrin repeat	0	1	0	0	2	0	286	372	237	295	177	194	0.00333333	0.00666667	3.39	2.53333	914.066	9.836	7.48951e-16	2.10406e-14	up	669.566	9.387	9.79797e-15	1.75649e-13	up	442.717	8.79	1.90986e-16	4.61424e-15	up	324.289	8.341	3.88674e-15	4.16815e-14	up
g47987	LG12	8208710	8209210	+	--	5	15	15	2	8	5	20	65	36	103	70	53	0.52	0.23	1.82333	3.36333	3.841	1.941	0.00838776	0.0240643	up	6.962	2.8	6.29519e-08	4.8487e-07	up	8.097	3.017	0.000248439	0.00107603	up	14.697	3.877	1.01501e-10	7.34016e-10	up
g4800	LG2	4132665	4133536	+	Core histone H2A/H2B/H3/H4	36	40	65	79	67	78	131	291	176	130	228	201	1.67333	2.66667	7.1	6.69667	4.672	2.224	6.49737e-07	5.12879e-06	up	4.328	2.114	9.12196e-09	7.98012e-08	up	2.691	1.428	0.0002036	0.000901396	up	2.49	1.316	1.60701e-05	6.1684e-05	up
g48010	LG12	8424127	8428169	+	--	26	28	28	12	1	0	110	133	111	39	54	67	0.676667	0.106667	2.93333	1.34	4.738	2.244	2.15586e-10	2.99248e-09	up	2.127	1.089	0.00861723	0.0228354	up	27.485	4.781	1.24727e-09	1.373e-08	up	12.333	3.624	1.33537e-05	5.18914e-05	up
g481	LG1	2629114	2633048	-	--	85	43	64	22	45	41	145	287	68	184	104	149	0.593333	0.34	1.54667	1.35	2.876	1.524	0.00373304	0.0119463	up	2.453	1.295	5.6719e-05	0.000255832	up	4.572	2.193	7.69926e-05	0.000374307	up	3.907	1.966	3.9058e-08	2.12697e-07	up
g48268	LG12	10430720	10432032	+	Protein of unknown function (DUF2959)	274	151	113	185	97	171	726	559	756	349	401	561	3.32333	2.87	12.7733	8.30333	4.202	2.071	5.06953e-12	8.89503e-11	up	2.686	1.425	1.12458e-06	7.01739e-06	up	4.473	2.161	1.61673e-17	4.28413e-16	up	2.857	1.515	1.93929e-09	1.22327e-08	up
g48570	LG12	12522743	12530318	+	Domain of unknown function (DUF4216)	18	15	18	13	12	7	60	95	33	50	40	32	0.156667	0.103333	0.583333	0.383333	4.037	2.013	0.000274315	0.00121689	up	2.605	1.381	0.00342702	0.0102014	up	5.814	2.539	3.67353e-05	0.000191769	up	3.75	1.907	0.000687797	0.00200726	up
g4866	LG2	4560528	4561833	-	--	59	119	76	15	17	20	713	527	542	630	527	555	1.91667	0.403333	13.3833	13.1067	7.597	2.925	9.17793e-27	7.11556e-25	up	7.329	2.874	6.31709e-33	4.58527e-31	up	33.543	5.068	5.86365e-77	2.47615e-74	up	32.309	5.014	6.23546e-83	1.11195e-80	up
g4867	LG2	4562362	4565503	-	Replication protein A OB domain	619	577	526	110	107	89	1536	1048	1069	1696	1484	1862	8.14333	1.48333	17.1333	24.15	2.295	1.199	8.38807e-16	2.34825e-14	up	3.184	1.671	9.62973e-56	1.8286e-53	up	11.642	3.541	5.10234e-84	2.56376e-81	up	16.134	4.012	2.4869e-183	2.3081e-180	up
g4869	LG2	4583968	4584487	+	Core histone H2A/H2B/H3/H4	171	126	93	1	41	14	243	379	208	400	419	515	5.47333	0.833333	11.83	19.1567	2.369	1.244	0.000211853	0.000968482	up	3.755	1.909	6.19682e-18	1.51488e-16	up	14.346	3.843	0.000840345	0.003197	up	22.804	4.511	5.3651e-05	0.000189561	up
g4870	LG2	4584778	4586848	+	Major Facilitator Superfamily	32	25	27	10	9	20	55	36	73	55	71	75	0.396667	0.19	0.78	0.973333	2.141	1.098	0.0193227	0.0484522	up	2.621	1.39	0.000230623	0.000914524	up	4.171	2.06	0.000430672	0.00176643	up	5.102	2.351	1.73785e-06	7.67062e-06	up
g4874	LG2	4616612	4620323	-	DNA-directed RNA polymerase III subunit Rpc31	12	17	4	11	6	9	42	24	51	29	36	25	0.203333	0.166667	0.75	0.59	3.928	1.974	0.00336441	0.0109124	up	3.047	1.608	0.0109554	0.0281275	up	4.458	2.156	0.000728557	0.00281379	up	3.457	1.789	0.00442959	0.0109254	up
g489	LG1	2695653	2699162	+	Hydroxymethylglutaryl-coenzyme A reductase	313	166	502	249	536	176	2570	4609	3504	953	877	1695	3.57333	3.56	38.7067	12.65	11.905	3.573	1.98318e-10	2.76822e-09	up	3.802	1.927	0.000451855	0.00167961	up	11.006	3.46	1.05603e-08	1.02242e-07	up	3.518	1.815	0.00117933	0.00328223	up
g48951	LG12	15354562	15363266	+	Glycosyl transferase family 21	838	790	969	527	1442	417	2143	3950	2690	3285	3851	3701	9.9	9.41	33.7533	41.85	3.742	1.904	3.31304e-12	5.99177e-11	up	4.552	2.186	1.38927e-42	1.63718e-40	up	3.629	1.86	0.00449956	0.0139922	up	4.419	2.144	0.000295361	0.000920528	up
g48963	LG12	15473874	15475654	+	--	53	39	38	56	36	53	120	201	73	174	186	153	0.57	0.646667	1.73333	2.29333	3.347	1.743	0.000102979	0.000508979	up	4.34	2.118	8.51443e-14	1.38509e-12	up	2.71	1.438	0.00145074	0.00519741	up	3.513	1.813	6.56033e-10	4.34416e-09	up
g49105	LG12	16596238	16599679	-	--	37	37	36	60	49	64	138	195	106	110	160	155	0.413333	0.663333	1.65	1.63	4.382	2.132	8.13624e-09	8.93468e-08	up	4.244	2.085	5.66674e-11	6.57732e-10	up	2.521	1.334	0.000169443	0.000764584	up	2.44	1.287	2.9229e-05	0.000107854	up
g49122	LG12	16708460	16713869	-	F-box-like	0	1	0	40	27	48	122	94	117	99	105	144	0.00333333	0.32	0.903333	0.956667	337.662	8.399	1.21472e-11	2.02058e-10	up	351.808	8.459	5.57733e-12	7.37514e-11	up	2.861	1.517	2.10009e-05	0.000115685	up	2.977	1.574	4.59996e-06	1.91409e-05	up
g49130	LG12	16747364	16750003	+	FBD	16	10	5	36	71	71	275	109	152	201	157	202	0.106667	0.65	1.85667	2	18.601	4.217	7.94654e-18	2.80336e-16	up	19.708	4.301	8.62469e-31	5.45056e-29	up	2.876	1.524	0.000275301	0.00117988	up	3.059	1.613	1.59865e-07	8.08473e-07	up
g49528	LG12	19714968	19718621	+	Rx N-terminal domain	155	111	118	58	98	103	288	319	308	660	558	547	2.90333	2.01667	6.96333	13.5467	2.625	1.392	6.13118e-09	6.88016e-08	up	5.017	2.327	4.55432e-37	4.00171e-35	up	3.488	1.803	1.39227e-09	1.52416e-08	up	6.672	2.738	4.65701e-34	1.56012e-32	up
g49529	LG12	19724048	19727352	+	Poxvirus A32 protein	73	73	81	266	250	198	492	1181	559	824	665	763	0.663333	2.11667	6.58333	6.61	10.939	3.451	2.65023e-20	1.2048e-18	up	10.756	3.427	1.04399e-90	5.73008e-88	up	3.145	1.653	2.8105e-06	1.84097e-05	up	3.089	1.627	3.70946e-26	8.32326e-25	up
g4960	LG2	5105938	5107502	+	Cation efflux family	87	79	108	48	42	72	337	240	165	236	213	154	1.3	0.776667	3.43667	2.89	2.89	1.531	7.35e-07	5.7474e-06	up	2.396	1.261	8.14805e-06	4.3698e-05	up	4.452	2.154	1.32605e-10	1.66469e-09	up	3.685	1.882	1.17307e-09	7.55834e-09	up
g49700	LG12	21003992	21011244	+	Integrase zinc binding domain	3	0	0	0	2	0	16	17	34	70	36	63	0.00666667	0.00333333	0.126667	0.306667	25.35	4.664	0.000217459	0.000991164	up	60.88	5.928	1.29282e-09	1.26804e-08	up	33.234	5.055	0.00025356	0.0010951	up	81.381	6.347	3.10592e-08	1.71278e-07	up
g49802	LG12	21631085	21633541	+	Fibronectin type-III domain	75	16	24	197	142	218	571	340	443	532	355	454	0.39	1.94667	4.61	4.64	12.927	3.692	7.54251e-16	2.11746e-14	up	12.784	3.676	2.57955e-20	7.75939e-19	up	2.381	1.251	9.66629e-08	8.12414e-07	up	2.355	1.236	2.58609e-10	1.79422e-09	up
g49918	LG12	22724783	22728315	+	Zinc-binding dehydrogenase	4	4	0	4	6	9	51	34	26	26	53	58	0.0466667	0.12	0.67	0.86	15.132	3.92	3.32644e-06	2.28872e-05	up	19.109	4.256	5.51373e-08	4.28386e-07	up	5.659	2.5	0.000197761	0.000878561	up	7.151	2.838	1.10754e-05	4.36277e-05	up
g49921	LG12	22744733	22746819	+	Zinc-binding dehydrogenase	6	2	11	2	27	1	627	263	772	405	390	306	0.11	0.183333	9.57333	6.46	94.249	6.558	8.52824e-34	1.04334e-31	up	63.201	5.982	1.91088e-46	2.54362e-44	up	52.648	5.718	9.73729e-06	5.73645e-05	up	35.162	5.136	3.27382e-05	0.000119818	up
g49972	LG12	23124292	23126476	+	Leucine rich repeat	289	274	272	275	358	335	1012	1412	1276	2032	1604	1757	2.81667	3.34667	12.6133	18.3867	4.904	2.294	2.87794e-25	2.03413e-23	up	7.015	2.81	2.0893e-117	2.2625e-114	up	3.805	1.928	2.84751e-17	7.39742e-16	up	5.444	2.445	7.30338e-71	9.37887e-69	up
g50106	LG12	24203781	24212870	+	Myb-like DNA-binding domain	0	0	0	0	0	0	654	784	742	927	668	774	0	0	15.97	17.3833	4352.84	12.088	8.08391e-24	5.18264e-22	up	4650.36	12.183	1.26352e-24	5.4087e-23	up	3928.75	11.94	2.4774e-23	1.08663e-21	up	4196.04	12.035	4.39415e-24	8.69398e-23	up
g50128	LG12	24325574	24326541	-	Polyketide cyclase / dehydrase and lipid transport	401	317	362	449	286	969	1604	1479	2459	3187	2012	1268	12.02	19.2067	62.2767	72.73	5.667	2.503	3.65301e-23	2.19427e-21	up	6.514	2.703	1.15522e-24	4.95568e-23	up	3.266	1.707	0.00228622	0.00776186	up	3.751	1.907	0.00225843	0.00593102	up
g50186	LG12	24711805	24713964	+	Pathogenesis-related protein Bet v I family	149	68	172	54	77	168	941	1038	579	624	608	761	4.88667	3.78667	31.58	25.0267	7.095	2.827	2.19015e-15	5.85676e-14	up	5.522	2.465	2.09877e-17	4.91188e-16	up	8.41	3.072	7.33231e-16	1.65467e-14	up	6.539	2.709	6.83924e-19	9.78264e-18	up
g50190	LG12	24759465	24760305	+	Pathogenesis-related protein Bet v I family	49	55	29	21	89	36	400	1702	436	145	84	262	1.53333	1.77333	30.25	5.69667	21.735	4.442	5.84195e-09	6.58145e-08	up	3.964	1.987	7.75039e-07	4.99027e-06	up	17.33	4.115	8.58827e-06	5.11265e-05	up	3.175	1.667	0.000899748	0.00256299	up
g50194	LG12	24785784	24787300	-	--	0	0	0	2	6	1	22	42	13	42	30	32	0	0.0933333	0.78	1.06333	153.891	7.266	1.1129e-06	8.40031e-06	up	204.374	7.675	5.5987e-09	5.05802e-08	up	8.406	3.071	0.00182549	0.00635667	up	11.211	3.487	9.14466e-06	3.65294e-05	up
g50248	LG12	25284916	25291500	-	Endonuclease/Exonuclease/phosphatase family	14	8	1	0	10	2	126	85	133	552	374	500	0.03	0.0166667	0.48	1.99333	16.636	4.056	6.07442e-12	1.05243e-10	up	67.46	6.076	9.61697e-60	2.14068e-57	up	27.721	4.793	7.05547e-11	9.1705e-10	up	112.993	6.82	9.69034e-11	7.02511e-10	up
g50321	LG12	25861174	25861850	+	Pyridoxal-dependent decarboxylase conserved domain	6	1	0	4	2	6	70	58	57	28	35	10	0.103333	0.186667	2.84667	1.16667	29.219	4.869	8.91177e-10	1.13287e-08	up	11.925	3.576	0.000519643	0.00190454	up	15.195	3.925	5.08817e-10	5.90225e-09	up	6.154	2.622	0.00227677	0.0059746	up
g50322	LG12	25862434	25864717	+	Pyridoxal-dependent decarboxylase conserved domain	69	34	28	25	29	44	363	385	424	146	171	136	0.563333	0.436667	5.14333	2.01667	9.961	3.316	4.65012e-23	2.77654e-21	up	3.846	1.943	7.11103e-08	5.42597e-07	up	11.874	3.57	3.26971e-33	2.6488e-31	up	4.583	2.196	1.07478e-10	7.74908e-10	up
g50337	LG12	25984144	25987825	+	Serglycin	1	0	0	1	2	2	17	6	19	34	47	43	0.00333333	0.0233333	0.193333	0.576667	42.355	5.404	0.000680025	0.00271528	up	126.782	6.986	7.22067e-08	5.50125e-07	up	8.198	3.035	0.00812409	0.0232976	up	24.557	4.618	5.60767e-08	2.99699e-07	up
g50413	LG12	26508678	26511313	+	SCO1/SenC	227	242	169	246	225	271	429	800	421	722	655	641	2.33	2.78	6.13	7.52667	2.883	1.528	1.61308e-06	1.18362e-05	up	3.465	1.793	9.11485e-28	4.78017e-26	up	2.226	1.155	0.000138344	0.000637959	up	2.678	1.421	1.17322e-21	2.00547e-20	up
g5045	LG2	5642434	5644730	+	--	23	35	10	15	13	22	123	74	114	63	78	81	0.293333	0.226667	1.37	1.00333	5.025	2.329	1.24002e-06	9.28971e-06	up	3.617	1.855	5.30004e-05	0.000240712	up	6.107	2.61	1.59226e-09	1.73449e-08	up	4.392	2.135	9.3336e-07	4.28317e-06	up
g50454	LG12	26732334	26736507	-	Golgi CORVET complex core vacuolar protein 8	2	9	3	14	32	41	110	208	103	405	318	282	0.07	0.436667	2.07333	4.96333	33.405	5.062	6.67067e-16	1.88563e-14	up	78.314	6.291	1.0758e-42	1.28669e-40	up	4.811	2.266	8.83981e-06	5.25058e-05	up	11.31	3.5	5.16835e-27	1.21021e-25	up
g50486	LG12	26920280	26921524	-	--	0	1	0	0	0	0	23	17	16	32	27	35	0.00666667	0	0.346667	0.593333	56.37	5.817	6.51895e-05	0.000337462	up	94.826	6.567	6.40294e-07	4.18373e-06	up	99.163	6.632	1.38067e-05	7.89591e-05	up	166.639	7.381	5.18273e-08	2.78227e-07	up
g505	LG1	2793890	2798579	+	Glycosyl transferases group 1	265	254	199	187	192	209	529	446	367	626	619	803	1.81333	1.52333	3.38	5.26333	2.036	1.026	4.67229e-08	4.51594e-07	up	3.112	1.638	6.66356e-24	2.67524e-22	up	2.235	1.16	3.57292e-10	4.23364e-09	up	3.414	1.772	2.00507e-28	5.09211e-27	up
g50518	LG12	27121861	27129362	+	Type III restriction enzyme, res subunit	161	213	112	171	97	167	1021	375	872	889	635	788	0.916667	0.836667	4.27	4.43667	5.055	2.338	1.78286e-11	2.90878e-10	up	5.183	2.374	3.75441e-31	2.44996e-29	up	5.097	2.35	6.41742e-12	9.51231e-11	up	5.215	2.383	1.78023e-34	6.04316e-33	up
g50544	LG12	27273705	27276198	+	NADH:flavin oxidoreductase / NADH oxidase family	10	16	5	0	4	1	52	46	58	93	27	78	0.186667	0.0333333	0.953333	1.19	5.566	2.477	1.19782e-05	7.30467e-05	up	6.832	2.772	2.12119e-06	1.26851e-05	up	30.567	4.934	2.43673e-08	2.23592e-07	up	37.496	5.229	1.90368e-09	1.20156e-08	up
g50565	LG12	27430571	27434167	+	Glycosyl hydrolase family 9	100	104	104	142	144	164	371	650	216	347	415	513	1.4	2.09	5.64	5.88	4.414	2.142	3.74576e-08	3.68361e-07	up	4.509	2.173	1.09534e-23	4.30266e-22	up	2.73	1.449	0.000122289	0.000570084	up	2.788	1.479	6.34326e-13	5.6203e-12	up
g50598	LG12	27603375	27606556	-	Pyruvate kinase, alpha/beta domain	842	882	900	1024	893	1284	3261	2331	2429	2546	1983	2453	9.86667	12.2367	29.85	26.4367	3.301	1.723	1.77776e-34	2.24351e-32	up	2.877	1.525	3.43298e-42	3.89658e-40	up	2.455	1.295	1.15438e-16	2.84615e-15	up	2.136	1.095	2.24693e-18	3.09993e-17	up
g50626	LG12	27840259	27842833	-	Transferase family	449	346	221	265	378	189	1141	1294	1212	916	763	809	4.74	4.04333	17.3033	11.8867	3.995	1.998	1.31263e-16	4.02081e-15	up	2.693	1.429	2.80323e-12	3.83596e-11	up	4.321	2.111	1.69764e-15	3.68643e-14	up	2.916	1.544	3.44174e-12	2.85904e-11	up
g50643	LG12	27911730	27915387	+	--	1440	1447	1366	1294	1039	1009	2329	4095	2073	3737	2690	3900	29.0167	23.24	58.45	70.8867	2.21	1.144	2.57378e-05	0.000145779	up	2.621	1.39	1.10004e-34	8.57493e-33	up	2.543	1.347	3.62443e-07	2.76676e-06	up	3.015	1.592	7.70097e-42	3.69547e-40	up
g50711	LG12	28455784	28460968	+	AAA ATPase domain	39	42	47	42	47	27	324	230	370	224	183	167	0.32	0.296667	2.31	1.45	7.864	2.975	6.48473e-23	3.82628e-21	up	4.871	2.284	5.71322e-17	1.28242e-15	up	7.843	2.971	1.61766e-19	5.15766e-18	up	4.853	2.279	9.04355e-14	8.64898e-13	up
g50713	LG12	28482454	28491998	+	Type III restriction enzyme, res subunit	147	156	126	55	35	60	836	204	842	406	383	417	0.84	0.3	3.65333	2.39667	4.734	2.243	1.65704e-07	1.45788e-06	up	3.068	1.617	7.50685e-22	2.53606e-20	up	12.266	3.617	1.63753e-15	3.55978e-14	up	7.927	2.987	1.3845e-39	6.002e-38	up
g50714	LG12	28506444	28514639	+	NACHT domain	132	88	72	22	43	56	1766	780	1709	1105	936	915	0.473333	0.203333	6.87667	4.87333	15.901	3.991	1.38323e-36	2.03441e-34	up	11.104	3.473	3.8277e-69	1.11945e-66	up	34.216	5.097	8.1441e-46	1.21534e-43	up	23.951	4.582	4.18579e-85	7.98763e-83	up
g50715	LG12	28524964	28553610	+	Poxvirus F12L protein	1013	914	948	342	258	279	2274	2537	2236	3230	2805	3071	2.38333	0.743333	5.85667	7.63333	2.69	1.427	4.30525e-20	1.93085e-18	up	3.444	1.784	1.04068e-71	3.28322e-69	up	7.965	2.994	1.65588e-76	6.84691e-74	up	10.187	3.349	4.3519e-204	4.5569e-201	up
g50719	LG12	28578834	28601264	-	Leucine Rich repeats (2 copies)	55	56	45	7	4	2	156	366	155	551	451	507	0.256667	0.02	1.13333	2.51667	4.848	2.277	1.03832e-07	9.46846e-07	up	10.529	3.396	1.27065e-69	3.7712e-67	up	52.463	5.713	2.95033e-20	1.00354e-18	up	113.856	6.831	8.67773e-55	6.47847e-53	up
g50721	LG12	28604621	28610924	-	TIR domain	0	0	1	0	1	0	14	29	2	36	56	26	0.00333333	0.00333333	0.186667	0.5	45.957	5.522	0.00142548	0.00518232	up	122.396	6.935	1.85341e-07	1.32821e-06	up	41.467	5.374	0.00228195	0.00774867	up	110.48	6.788	4.55412e-07	2.17161e-06	up
g50757	LG12	28940770	28954700	+	AMP-binding enzyme C-terminal domain	2312	2168	2279	3114	2879	3012	14248	12262	11977	7496	6669	8190	10.1567	13.7933	57.5733	33.9167	6.193	2.631	8.4045e-128	1.4009e-124	up	3.587	1.843	5.30741e-82	2.3628e-79	up	4.205	2.072	1.645e-158	3.1094e-155	up	2.434	1.283	1.15071e-72	1.57162e-70	up
g50763	LG12	28986872	28988165	-	non-haem dioxygenase in morphine synthesis N-terminal	980	828	416	135	622	121	5692	6304	3930	1756	1316	1927	12.4733	5.24	90.4333	28.6533	7.933	2.988	2.8916e-27	2.34642e-25	up	2.463	1.3	1.39124e-08	1.184e-07	up	17.428	4.123	2.59462e-07	2.03263e-06	up	5.419	2.438	0.00185669	0.00496865	up
g50833	LG12	29434436	29438687	-	Lateral organ boundaries (LOB) domain	132	92	109	127	165	226	1017	757	602	262	407	624	2.23	3.54667	15.7067	8.77667	7.702	2.945	2.38879e-39	4.04931e-37	up	4.232	2.081	6.94742e-12	9.10573e-11	up	4.46	2.157	1.38441e-17	3.68891e-16	up	2.449	1.292	1.94212e-05	7.35992e-05	up
g50998	LG12	30560271	30565467	+	--	4	0	7	0	0	0	48	71	76	51	56	88	0.11	0	1.97	1.96333	19.437	4.281	1.91549e-08	1.98455e-07	up	19.018	4.249	2.92338e-10	3.11436e-09	up	354.328	8.469	1.04322e-10	1.32812e-09	up	345.67	8.433	4.31871e-11	3.23365e-10	up
g51132	LG12	31426431	31428183	+	Protein kinase domain	64	30	48	33	20	16	184	114	88	141	135	163	0.936667	0.46	2.49333	2.93	2.913	1.542	0.000128214	0.000619543	up	3.366	1.751	3.54675e-08	2.83818e-07	up	5.43	2.441	1.43912e-08	1.36079e-07	up	6.263	2.647	2.78889e-14	2.77577e-13	up
g51202	LG13	267778	271437	-	AUX/IAA family	24	74	34	0	6	7	184	25	182	76	82	93	0.836667	0.0866667	2.46	1.62333	3.179	1.669	0.014296	0.0377225	up	2.078	1.055	0.0157736	0.0385654	up	28.843	4.85	3.24812e-08	2.91839e-07	up	18.901	4.24	2.45289e-12	2.06448e-11	up
g51298	LG13	1069467	1073795	+	LisH-like dimerisation domain	0	0	0	0	0	0	42	75	22	3	9	6	0	0	0.56	0.0766667	277.089	8.114	6.21783e-09	6.96568e-08	up	36.485	5.189	0.00569253	0.0158943	up	250.045	7.966	1.60053e-08	1.50552e-07	up	32.938	5.042	0.0104121	0.0233934	up
g51331	LG13	1285100	1291141	+	Suppressor of cytokine signalling	7	24	1	26	15	23	161	37	118	160	109	93	0.153333	0.313333	1.49	1.76333	10.716	3.422	2.5836e-05	0.000146232	up	12.501	3.644	3.59466e-09	3.33474e-08	up	4.778	2.256	5.85298e-05	0.000292576	up	5.568	2.477	1.30246e-10	9.32808e-10	up
g51524	LG13	2687935	2688800	-	--	0	0	0	0	0	0	292	82	201	63	58	74	0	0	6.11	2.14333	1109	10.115	2.36419e-15	6.30951e-14	up	383.715	8.584	7.48278e-12	9.77543e-11	up	1002.59	9.97	6.69113e-15	1.37263e-13	up	346.217	8.436	2.78806e-11	2.13054e-10	up
g51526	LG13	2705155	2707888	+	--	0	0	0	0	0	0	44	4	30	7	6	6	0	0	0.753333	0.19	149.095	7.22	8.03913e-06	5.0895e-05	up	37.488	5.228	0.00379792	0.0111675	up	134.847	7.075	1.6734e-05	9.41275e-05	up	33.827	5.08	0.00773314	0.0179448	up
g51541	LG13	2801604	2807147	+	Reverse transcriptase (RNA-dependent DNA polymerase)	0	0	0	1	1	0	16	5	17	15	14	18	0	0.00666667	0.14	0.173333	74.438	6.218	0.000250904	0.00112565	up	92.491	6.531	8.10315e-06	4.34805e-05	up	18.533	4.212	0.00480147	0.0147989	up	23.005	4.524	0.000726781	0.00210972	up
g51605	LG13	3210817	3224048	+	Plant protein of unknown function	22	22	11	20	29	36	53	110	71	56	60	74	0.0833333	0.133333	0.363333	0.293333	4.787	2.259	1.39385e-05	8.37757e-05	up	3.793	1.923	6.2578e-06	3.42435e-05	up	2.759	1.464	0.00340598	0.0109696	up	2.191	1.132	0.00664626	0.0156905	up
g51611	LG13	3273710	3274742	-	SAM domain (Sterile alpha motif)	12	24	22	10	7	14	224	81	156	117	141	198	0.42	0.223333	3.23	3.29333	8.44	3.077	5.98169e-11	8.98939e-10	up	8.513	3.09	4.51901e-16	9.20973e-15	up	14.407	3.849	1.59826e-14	3.1501e-13	up	14.471	3.855	4.27138e-20	6.59473e-19	up
g51652	LG13	3564924	3571436	+	FAR1 DNA-binding domain	15	10	16	29	8	1	80	32	51	53	70	33	0.15	0.136667	0.573333	0.576667	4.233	2.082	0.000134211	0.000644395	up	4.209	2.073	8.44068e-05	0.000367921	up	4.199	2.07	0.0185512	0.0470658	up	4.173	2.061	0.00803627	0.0185589	up
g5174	LG2	6433599	6436606	+	Cytochrome P450	1319	1890	1221	2110	2181	1869	5064	6564	3285	6119	4750	7382	18.3633	26.2433	62.05	76.4967	3.694	1.885	9.40341e-13	1.84313e-11	up	4.46	2.157	6.95405e-38	6.37592e-36	up	2.388	1.256	4.43211e-08	3.91049e-07	up	2.882	1.527	4.26621e-38	1.71139e-36	up
g51741	LG13	4146576	4148319	-	Phosphotransferase enzyme family	730	441	446	535	595	545	1635	2533	1687	1679	697	1229	6.79333	7.24	24.9533	15.1833	4.033	2.012	7.61129e-14	1.69443e-12	up	2.396	1.261	7.24694e-07	4.68706e-06	up	3.48	1.799	1.50632e-15	3.29258e-14	up	2.069	1.049	6.09639e-07	2.86258e-06	up
g51831	LG13	4804020	4806632	-	--	0	0	1	1	0	0	21	17	5	9	26	12	0.00666667	0.00666667	0.28	0.323333	42.702	5.416	0.000742888	0.00293349	up	49.296	5.623	0.000172945	0.000703775	up	38.58	5.27	0.00129533	0.00471122	up	44.506	5.476	0.000356006	0.00109359	up
g52174	LG13	7376026	7381857	+	--	13	5	17	14	24	10	96	55	179	34	36	55	0.123333	0.166667	1.15	0.433333	10.311	3.366	6.4129e-08	6.05067e-07	up	3.837	1.94	0.000763562	0.0026813	up	6.802	2.766	2.76619e-06	1.81464e-05	up	2.53	1.339	0.0149139	0.032243	up
g523	LG1	2928934	2934235	-	DNA alkylation repair enzyme	24	13	10	34	37	47	294	311	228	334	222	304	0.103333	0.273333	1.86333	1.93667	19.505	4.286	1.53205e-32	1.68842e-30	up	19.875	4.313	2.30469e-41	2.5093e-39	up	6.957	2.798	9.63004e-23	4.02808e-21	up	7.098	2.827	2.53955e-28	6.39776e-27	up
g52300	LG13	8375366	8375990	-	Probable lipid transfer	174	339	198	157	67	185	860	1458	1045	590	499	625	8.34667	4.87333	40.14	20.4167	5.257	2.394	6.83016e-14	1.53076e-12	up	2.619	1.389	4.55173e-09	4.16189e-08	up	8.311	3.055	1.5252e-18	4.45494e-17	up	4.135	2.048	2.61961e-14	2.61494e-13	up
g52660	LG13	10905548	10907545	-	Transposase, Mutator family	0	0	0	0	0	0	13	0	15	30	24	35	0	0	0.133333	0.44	54.471	5.767	0.0131121	0.0351034	up	174.419	7.446	2.57855e-08	2.10804e-07	up	49.241	5.622	0.0189278	0.0478804	up	157.357	7.298	9.38377e-08	4.8847e-07	up
g53119	LG13	14249453	14250291	-	Trypsin and protease inhibitor	364	275	56	238	153	158	1633	3388	2173	558	629	996	5.94	4.9	64.1967	19.3733	11.877	3.57	2.20665e-06	1.57609e-05	up	3.499	1.807	0.0106941	0.0275549	up	13.245	3.727	2.7999e-35	2.50885e-33	up	3.906	1.966	1.65817e-17	2.13409e-16	up
g53231	LG13	15175064	15182355	+	DUF761-associated sequence motif	38	111	47	69	99	67	152	204	186	163	168	180	0.356667	0.44	0.996667	0.946667	3.066	1.616	0.000236479	0.00106788	up	2.855	1.513	6.65506e-05	0.000295816	up	2.288	1.194	0.000270639	0.00116153	up	2.131	1.091	6.75052e-05	0.000234255	up
g53233	LG13	15194304	15196878	+	Aspartyl protease	39	83	54	15	17	32	142	115	104	239	193	304	0.566667	0.21	1.15667	2.38667	2.222	1.152	0.00175731	0.00622188	up	4.512	2.174	5.69627e-13	8.41255e-12	up	5.53	2.467	1.92975e-09	2.07592e-08	up	11.212	3.487	2.91323e-26	6.57642e-25	up
g53234	LG13	15196944	15198996	+	H2C2 zinc finger	7	21	8	4	12	6	34	85	47	274	217	220	0.126667	0.0833333	0.606667	2.58333	5.176	2.372	0.000383179	0.00163895	up	21.531	4.428	6.18601e-33	4.49827e-31	up	7.529	2.912	3.35101e-05	0.000176628	up	31.591	4.981	1.40325e-34	4.77937e-33	up
g53278	LG13	15506401	15508475	-	X8 domain	4	9	5	16	14	22	113	259	60	20	73	92	0.156667	0.46	3.75	1.63667	26.604	4.734	1.51942e-12	2.89311e-11	up	11.341	3.504	3.98088e-07	2.69794e-06	up	8.315	3.056	1.70872e-07	1.38255e-06	up	3.544	1.826	0.00217561	0.00573528	up
g53311	LG13	15768052	15771702	-	Phosphotransferase enzyme family	19	40	32	20	74	29	134	307	39	165	88	59	0.196667	0.276667	1.03	0.67	5.79	2.533	0.000118924	0.000579483	up	3.697	1.886	4.72656e-05	0.000216656	up	3.818	1.933	0.00667063	0.0196988	up	2.441	1.287	0.0147643	0.0319535	up
g53350	LG13	16063663	16065949	+	Thioredoxin	673	630	523	561	609	557	1745	2807	1718	1157	1368	1823	8.46667	8.22333	29.4333	20.5167	3.812	1.93	4.27527e-15	1.10343e-13	up	2.603	1.38	2.73662e-15	5.14055e-14	up	3.616	1.854	4.06216e-15	8.49118e-14	up	2.47	1.304	1.74978e-15	1.93333e-14	up
g5345	LG2	7550532	7555603	+	--	51	22	34	23	18	5	123	35	91	97	63	56	0.27	0.12	0.62	0.55	2.494	1.318	0.0140756	0.0372455	up	2.197	1.136	0.00711474	0.0193383	up	5.225	2.385	0.00026574	0.00114285	up	4.599	2.201	4.05642e-05	0.000146155	up
g5346	LG2	7555721	7559827	-	SWIM zinc finger	27	24	6	118	81	104	382	145	331	306	159	192	0.126667	0.713333	1.97	1.52667	16.49	4.043	2.29786e-16	6.80931e-15	up	12.597	3.655	5.23358e-19	1.39796e-17	up	2.764	1.467	3.60444e-05	0.000188608	up	2.114	1.08	7.99592e-05	0.000274436	up
g53565	LG13	17737704	17740759	-	SPFH domain / Band 7 family	34	51	25	17	29	26	185	57	149	121	141	159	0.49	0.336667	1.73333	1.92333	3.834	1.939	6.04104e-05	0.000314923	up	4.203	2.072	3.36305e-10	3.55346e-09	up	5.23	2.387	1.92003e-06	1.29817e-05	up	5.74	2.521	7.51707e-13	6.61155e-12	up
g53727	LG13	19028124	19030654	-	Putative gypsy type transposon	6	6	0	0	4	1	53	90	73	87	72	72	0.04	0.0166667	0.73	0.776667	20.352	4.347	1.29718e-09	1.61111e-08	up	21.193	4.406	1.19421e-13	1.91164e-12	up	42.917	5.423	3.66823e-10	4.33714e-09	up	45.121	5.496	1.83452e-12	1.56303e-11	up
g53789	LG13	19501616	19513722	+	Histidine kinase-, DNA gyrase B-, and HSP90-like ATPase	6	5	4	12	2	14	49	25	47	53	35	44	0.05	0.0933333	0.4	0.443333	8.777	3.134	2.47015e-06	1.74838e-05	up	9.544	3.255	2.83251e-08	2.29552e-07	up	4.281	2.098	0.00450032	0.0139923	up	4.644	2.215	0.000489752	0.00146962	up
g53797	LG13	19563895	19564591	-	Protease inhibitor/seed storage/LTP family	11	6	6	7	8	10	86	82	68	70	108	153	0.24	0.27	2.48667	3.55333	11.239	3.49	2.74895e-12	5.03072e-11	up	15.772	3.979	1.28643e-15	2.48881e-14	up	9.287	3.215	4.96449e-11	6.57762e-10	up	13.026	3.703	4.3976e-14	4.3035e-13	up
g5380	LG2	7789619	7796000	+	gag-polypeptide of LTR copia-type	56	30	36	84	22	30	108	153	116	281	205	133	0.233333	0.263333	0.73	1.21	3.426	1.777	3.87559e-06	2.62696e-05	up	5.563	2.476	4.06072e-12	5.46526e-11	up	2.801	1.486	0.00388306	0.0122917	up	4.54	2.183	7.27721e-07	3.3855e-06	up
g5394	LG2	7887059	7890799	+	AhpC/TSA family	67	60	51	47	74	61	82	891	448	286	149	918	1.05	1.11	8.75333	7.92	9.196	3.201	0.000427157	0.00180448	up	8.032	3.006	2.16607e-05	0.000106306	up	8.019	3.003	0.00116158	0.00427607	up	7.018	2.811	0.000120646	0.000402224	up
g5396	LG2	7910629	7912162	+	Xylanase inhibitor N-terminal	113	90	111	299	356	230	915	1993	724	1097	635	505	1.51333	4.36	17.6267	10.8367	12.813	3.68	1.07236e-22	6.13728e-21	up	7.704	2.946	2.17806e-27	1.11739e-25	up	4.093	2.033	2.83755e-08	2.57618e-07	up	2.462	1.3	4.1261e-07	1.97651e-06	up
g540	LG1	3059015	3061177	+	Divergent CCT motif	109	119	42	20	20	23	384	287	650	125	189	289	1.82	0.443333	9.17333	4.19667	5.493	2.458	4.59192e-09	5.25758e-08	up	2.469	1.304	0.000932626	0.00320696	up	20.913	4.386	2.4092e-29	1.56519e-27	up	9.402	3.233	1.16556e-17	1.5173e-16	up
g5412	LG2	7986436	7989109	+	--	6	11	14	24	49	25	140	54	86	148	84	124	0.16	0.51	1.38333	1.8	9.537	3.254	2.03306e-09	2.46015e-08	up	12.276	3.618	3.84979e-17	8.80923e-16	up	2.727	1.447	0.00371091	0.0118146	up	3.498	1.806	3.96663e-06	1.66532e-05	up
g54136	LG13	21935393	21936896	-	No apical meristem (NAM) protein	581	386	365	191	144	93	997	720	927	1465	997	1028	7.43333	2.44667	14.7967	19.76	2.174	1.121	1.03175e-07	9.41707e-07	up	2.858	1.515	4.36991e-15	8.09848e-14	up	6.082	2.604	4.04576e-24	1.91186e-22	up	7.987	2.998	1.69511e-42	8.43156e-41	up
g5443	LG2	8217750	8218352	-	Glutaredoxin	5	0	3	25	3	4	48	26	57	47	62	43	0.1	0.39	1.6	1.90667	17.898	4.162	1.10815e-06	8.36601e-06	up	21.01	4.393	2.41254e-09	2.28464e-08	up	4.112	2.04	0.0157205	0.0409063	up	4.815	2.268	0.0015233	0.00415212	up
g54432	LG13	23846980	23849576	-	Lytic transglycolase	39	52	54	76	36	94	118	356	185	204	397	347	0.716667	1.02667	3.31667	4.79667	5.076	2.344	5.84274e-07	4.65893e-06	up	7.202	2.848	5.75004e-18	1.40909e-16	up	3.268	1.708	0.00059746	0.00236146	up	4.629	2.211	3.89912e-10	2.64851e-09	up
g54452	LG13	23964201	23967389	+	Glycosyl hydrolase catalytic core	175	274	249	147	174	201	509	678	371	460	644	739	2.97	2.26667	6.61667	7.96	2.434	1.283	1.88934e-05	0.000110067	up	2.877	1.524	7.5843e-10	7.666e-09	up	2.949	1.56	1.66547e-08	1.56401e-07	up	3.483	1.8	4.53454e-16	5.23247e-15	up
g54484	LG13	24153523	24154227	-	--	17	24	32	11	26	14	184	174	113	112	104	33	0.88	0.63	5.56667	3.04	6.937	2.794	9.02812e-13	1.77392e-11	up	3.732	1.9	0.00037609	0.00142508	up	8.975	3.166	4.43011e-13	7.48311e-12	up	4.829	2.272	6.32191e-05	0.000220581	up
g5453	LG2	8308645	8313388	+	Glutathione S-transferase, C-terminal domain	1749	1360	984	1570	1542	1677	21008	17357	18545	17375	13893	18690	19.5567	23.5867	273.757	242.96	15.296	3.935	3.3742e-109	4.8209e-106	up	13.336	3.737	2.1335e-128	2.7575e-125	up	11.689	3.547	0	0	up	10.188	3.349	0	0	up
g5455	LG2	8320765	8322399	+	Glutathione S-transferase, C-terminal domain	374	305	242	360	531	509	1497	1726	1479	1850	2213	1702	5.82667	9.15	30.0667	37.5367	5.646	2.497	5.68318e-38	8.84652e-36	up	6.937	2.794	2.39723e-49	3.49585e-47	up	3.315	1.729	1.11548e-16	2.75366e-15	up	4.075	2.027	6.11498e-27	1.42289e-25	up
g54580	LG13	24676448	24677802	-	--	1	0	0	4	0	0	19496	18659	20402	10300	8221	10770	0.00666667	0.0233333	367.35	184.83	59720.9	15.866	1.05775e-40	1.89754e-38	up	29510.3	14.849	3.54288e-36	2.95735e-34	up	14503.5	13.824	3.80143e-79	1.69548e-76	up	7159.57	12.806	1.45428e-69	1.7781e-67	up
g54700	LG13	25412024	25416351	-	MatE	3092	2726	2462	2274	1936	1989	8223	10049	7114	6649	5828	6530	29.2367	22.3833	90.11	68.1233	3.375	1.755	1.79609e-23	1.11795e-21	up	2.504	1.324	4.85906e-50	7.26448e-48	up	4.062	2.022	1.36127e-35	1.24794e-33	up	3.012	1.591	1.88074e-92	4.29071e-90	up
g5471	LG2	8401415	8415924	+	Dynamin family	10017	11806	11514	1940	1944	2677	45370	34576	39289	33154	33948	37250	33.8967	6.79	120.443	107.397	3.875	1.954	9.88757e-44	2.14974e-41	up	3.404	1.767	1.52173e-46	2.03238e-44	up	17.854	4.158	4.0126e-171	1.0619e-167	up	15.664	3.969	1.2109e-230	1.978e-227	up
g54718	LG13	25522597	25528246	-	Xylanase inhibitor C-terminal	1	0	8	6	1	4	41	105	28	23	49	36	0.04	0.0466667	0.76	0.48	20.73	4.374	1.50928e-05	9.01042e-05	up	12.927	3.692	5.717e-05	0.000257635	up	16.03	4.003	1.9051e-06	1.2894e-05	up	9.932	3.312	1.90061e-05	7.21329e-05	up
g5473	LG2	8444255	8449724	+	RecF/RecN/SMC N terminal domain	29	52	60	28	28	18	727	446	509	328	270	391	0.256667	0.136667	2.96667	1.78	12.734	3.671	8.67265e-33	9.80083e-31	up	7.523	2.911	2.92674e-24	1.21017e-22	up	22.122	4.467	8.06338e-57	1.97578e-54	up	13.039	3.705	1.25049e-41	5.94484e-40	up
g5476	LG2	8454744	8461520	-	Dynamin family	494	578	489	56	37	103	1308	828	1178	979	1001	1078	2.40667	0.306667	5.08667	4.79	2.303	1.204	1.94365e-10	2.71588e-09	up	2.138	1.096	6.92962e-16	1.37928e-14	up	16.651	4.058	5.13215e-38	5.333e-36	up	15.425	3.947	1.78063e-56	1.39302e-54	up
g54802	LG13	26009356	26011636	-	NUDIX domain	15	22	8	5	19	0	81	65	102	66	35	18	0.36	0.206667	2.04	0.983333	6.102	2.609	1.22428e-07	1.10428e-06	up	2.9	1.536	0.0145116	0.0359311	up	10.016	3.324	0.000117514	0.000550253	up	4.753	2.249	0.014764	0.0319535	up
g54891	LG13	26617830	26619265	+	--	147	173	200	120	119	142	1516	1582	1309	1972	3217	3470	3.65	2.71	30.7267	61.6533	9.213	3.204	6.35962e-56	2.56987e-53	up	18.19	4.185	2.772e-70	8.41407e-68	up	11.423	3.514	1.17021e-95	8.29491e-93	up	22.543	4.495	3.2307e-104	9.0987e-102	up
g54911	LG13	26731098	26734347	-	Protein kinase domain	2	0	4	0	0	0	36	128	31	110	87	93	0.02	0	0.663333	0.976667	35.935	5.167	1.24862e-07	1.12426e-06	up	52.313	5.709	1.24891e-16	2.70194e-15	up	357.308	8.481	2.66871e-09	2.82116e-08	up	515.093	9.009	3.62447e-13	3.28479e-12	up
g54939	LG13	26917431	26919154	-	Lateral organ boundaries (LOB) domain	84	88	20	29	50	28	857	456	582	190	195	115	1.34333	0.79	13.38	3.66333	10.821	3.436	1.85625e-16	5.57083e-15	up	2.929	1.55	0.000637718	0.00228913	up	17.087	4.095	4.70611e-40	5.60989e-38	up	4.615	2.206	3.64937e-09	2.23165e-08	up
g54983	LG13	27196351	27200038	+	Aromatic amino acid lyase	1979	2211	2286	2103	3253	2635	9325	13102	8391	5744	6238	8192	17.8467	22.56	85.0733	56.12	5.22	2.384	8.96471e-28	7.50279e-26	up	3.377	1.756	9.86023e-31	6.21179e-29	up	3.81	1.93	1.23907e-16	3.04361e-15	up	2.464	1.301	3.93685e-15	4.21966e-14	up
g55007	LG13	27368063	27371476	-	Multicopper oxidase	0	2	2	0	0	0	104	151	85	122	52	30	0.0133333	0	1.23667	0.74	93.204	6.542	1.19723e-14	2.95284e-13	up	54.712	5.774	7.01801e-10	7.12778e-09	up	611.655	9.257	2.83434e-13	4.89808e-12	up	359.79	8.491	1.80049e-10	1.26682e-09	up
g55031	LG13	27506443	27507675	+	LSM domain	169	121	108	248	242	274	770	1328	743	461	943	756	3.65	7.20333	26.4733	20.5433	7.952	2.991	4.89128e-23	2.91184e-21	up	6.063	2.6	2.77261e-19	7.57777e-18	up	3.714	1.893	3.60185e-12	5.50117e-11	up	2.833	1.502	3.35898e-09	2.06086e-08	up
g55263	LG13	28875416	28876882	-	RNA recognition motif. (a.k.a. RRM, RBD, or RNP domain)	42	49	29	0	2	0	1485	1617	1250	261	202	265	0.843333	0.0166667	30.7867	5.19	39.859	5.317	2.544e-116	3.7694e-113	up	6.6	2.722	5.8814e-27	2.93828e-25	up	2148.94	11.069	1.21204e-26	6.65451e-25	up	355.311	8.473	6.80008e-16	7.74818e-15	up
g55270	LG13	28903817	28906189	+	--	14	20	17	33	23	45	70	119	55	74	90	64	0.216667	0.436667	1.04667	0.996667	5.267	2.397	1.89548e-06	1.37371e-05	up	4.917	2.298	4.01783e-08	3.18037e-07	up	2.414	1.272	0.00896183	0.025377	up	2.252	1.171	0.00405955	0.0100993	up
g55329	LG13	29189150	29189955	+	Trypsin and protease inhibitor	1238	1115	243	204	250	166	5634	7024	5708	1949	2365	3331	23.1367	5.81667	168.833	70.81	7.99	2.998	2.09623e-06	1.5061e-05	up	3.285	1.716	0.00818933	0.0218355	up	29.323	4.874	2.0341e-126	2.2428e-123	up	12.063	3.593	4.91148e-74	7.06233e-72	up
g55378	LG14	59886	60843	+	--	97	67	65	23	29	26	109	292	96	272	299	344	2.11	0.74	4.66333	8.58667	2.434	1.283	0.00821637	0.0236455	up	4.377	2.13	4.19874e-20	1.23421e-18	up	6.392	2.676	2.75697e-07	2.15217e-06	up	11.53	3.527	3.671e-38	1.47697e-36	up
g55448	LG14	585416	594205	-	Zinc knuckle	13	13	5	0	0	0	94	71	121	54	20	20	0.05	0	0.483333	0.156667	10.225	3.354	3.40671e-11	5.3112e-10	up	3.293	1.719	0.00964252	0.0251233	up	513.345	9.004	1.54633e-12	2.45526e-11	up	164.73	7.364	1.60912e-07	8.13664e-07	up
g55735	LG14	2638835	2641476	-	Domain of unknown function	0	4	0	4	11	30	800	1986	802	2918	3527	3209	0.02	0.223333	17.8	48.1567	1011.53	9.982	3.44164e-15	9.04618e-14	up	2654.17	11.374	2.20715e-53	3.77923e-51	up	80.116	6.324	1.0579e-12	1.71191e-11	up	212.309	7.73	1.09864e-25	2.3941e-24	up
g55849	LG14	3613332	3620590	+	AAA ATPase domain	81	144	104	103	74	112	309	148	222	251	236	179	0.686667	0.606667	1.39	1.40667	2.213	1.146	0.000629864	0.00253913	up	2.214	1.147	5.70293e-05	0.000257087	up	2.289	1.195	0.000111851	0.000525748	up	2.285	1.192	5.2531e-06	2.16797e-05	up
g55850	LG14	3627592	3630511	+	AAA ATPase domain	45	56	72	48	32	46	222	180	216	114	144	173	0.443333	0.323333	1.56	1.10667	3.866	1.951	1.85125e-10	2.59949e-09	up	2.698	1.432	8.28739e-06	4.43799e-05	up	4.849	2.278	2.31639e-15	4.95949e-14	up	3.381	1.757	4.00794e-08	2.17794e-07	up
g55854	LG14	3688997	3695146	+	AAA ATPase domain	123	101	80	75	71	100	279	124	268	315	314	348	0.61	0.506667	1.34667	2	2.403	1.265	0.000253709	0.00113632	up	3.521	1.816	5.20649e-19	1.39165e-17	up	2.668	1.416	6.6622e-05	0.000328639	up	3.909	1.967	1.39332e-19	2.09111e-18	up
g55895	LG14	4005762	4011224	-	AAA ATPase domain	57	67	61	85	79	56	498	390	335	252	227	331	0.52	0.633333	3.41	2.3	7.151	2.838	3.196e-35	4.31946e-33	up	4.74	2.245	8.26616e-22	2.78086e-20	up	5.433	2.442	1.88037e-23	8.34914e-22	up	3.597	1.847	1.18524e-13	1.12327e-12	up
g55900	LG14	4041598	4044469	-	Leucine Rich repeats (2 copies)	62	115	109	37	19	33	352	345	237	225	238	189	0.87	0.27	2.80667	2.00667	3.524	1.817	1.17635e-08	1.26132e-07	up	2.483	1.312	1.28611e-05	6.61496e-05	up	10.357	3.373	1.58865e-26	8.66227e-25	up	7.286	2.865	6.51078e-20	9.98051e-19	up
g55963	LG14	4455382	4456561	+	Cytochrome P450	8	10	7	10	25	49	119	165	106	99	166	86	0.186667	0.643333	2.92	2.70333	17.196	4.104	1.99074e-18	7.44294e-17	up	15.691	3.972	6.91853e-16	1.37776e-14	up	4.596	2.2	5.44429e-05	0.000273801	up	4.196	2.069	6.77109e-05	0.000234929	up
g55964	LG14	4460608	4466687	-	Cytochrome P450	73	42	105	168	149	377	3447	2990	3060	2071	1925	1648	0.976667	3.09333	41.5567	25.15	46.539	5.54	4.86274e-86	4.229e-83	up	27.757	4.795	1.39615e-74	4.90697e-72	up	13.521	3.757	5.73362e-38	5.91159e-36	up	8.053	3.01	4.4776e-12	3.68059e-11	up
g5668	LG2	9761561	9763696	-	--	0	0	0	4	5	2	51	14	26	26	12	16	0	0.0966667	0.746667	0.46	174.052	7.443	2.98253e-07	2.50717e-06	up	105.073	6.715	3.76266e-06	2.14725e-05	up	7.874	2.977	0.000492795	0.00199168	up	4.742	2.246	0.00993241	0.0224094	up
g56775	LG14	9953227	9957419	+	Zinc knuckle	2	2	0	0	0	0	14	11	11	18	14	13	0.0133333	0	0.153333	0.193333	9.934	3.312	0.00619004	0.0185437	up	12.399	3.632	0.000807001	0.00281656	up	63.969	5.999	0.000375464	0.00156096	up	80.062	6.323	3.65568e-05	0.000132818	up
g56901	LG14	10797034	10799328	+	Reverse transcriptase (RNA-dependent DNA polymerase)	128	133	119	116	74	77	271	198	293	447	312	425	1.27667	0.91	2.56	4	2.191	1.132	4.48496e-06	2.99534e-05	up	3.37	1.753	1.5636e-22	5.60364e-21	up	2.826	1.499	1.89277e-07	1.52123e-06	up	4.337	2.117	4.08467e-22	7.15597e-21	up
g5697	LG2	9993238	9994455	+	--	1018	1100	1112	570	535	550	3828	6335	4016	4684	5231	6558	25.01	13.0533	110.59	129.017	4.848	2.277	1.40398e-20	6.68643e-19	up	5.542	2.47	3.22462e-63	7.87811e-61	up	8.563	3.098	1.89915e-42	2.50455e-40	up	9.787	3.291	2.7182e-150	1.5417e-147	up
g57031	LG14	11839932	11842504	-	Leucine rich repeat	0	0	0	0	0	0	30	40	33	51	40	59	0	0	0.366667	0.533333	205.803	7.685	1.84084e-08	1.91082e-07	up	293.832	8.199	1.32951e-10	1.47807e-09	up	185.763	7.537	5.13413e-08	4.49355e-07	up	265.088	8.05	4.94333e-10	3.32133e-09	up
g57246	LG14	13453618	13458621	+	Haspin like kinase domain	0	0	1	0	0	0	5	24	13	11	9	9	0.00333333	0	0.196667	0.136667	44.259	5.468	0.00084502	0.00328728	up	29.352	4.875	0.00181834	0.00582936	up	77.75	6.281	0.000312779	0.00132364	up	51.589	5.689	0.000781563	0.00225623	up
g57285	LG14	13751596	13757010	-	POT family	59	45	71	51	69	34	580	337	379	216	241	349	0.563333	0.506667	4.08333	2.60333	7.918	2.985	5.56803e-26	4.12498e-24	up	4.975	2.315	7.049e-16	1.40095e-14	up	8.133	3.024	3.45674e-22	1.39446e-20	up	5.105	2.352	2.84952e-14	2.83405e-13	up
g57739	LG14	17140252	17152367	+	Integrase core domain	0	0	0	12	11	13	58	86	53	37	29	54	0	0.0933333	0.5	0.303333	393.376	8.62	3.15819e-11	4.94688e-10	up	234.183	7.871	1.84851e-09	1.77485e-08	up	5.444	2.445	1.60371e-06	1.10233e-05	up	3.242	1.697	0.00165065	0.00446312	up
g57832	LG14	17845526	17848879	-	Annexin	310	373	290	469	407	328	649	1197	932	873	1008	1349	4.98333	6.31	14.4833	16.7933	3.186	1.672	3.99795e-09	4.6265e-08	up	3.619	1.856	1.44036e-23	5.61936e-22	up	2.32	1.214	1.49006e-05	8.47391e-05	up	2.636	1.398	2.12216e-14	2.1314e-13	up
g5784	LG2	10678014	10680100	-	PIF1-like helicase	20	17	5	10	12	11	53	66	75	59	62	54	0.243333	0.203333	1.17333	1.06333	5.197	2.378	2.52966e-05	0.000143467	up	4.632	2.212	1.28981e-05	6.63227e-05	up	5.858	2.55	5.56783e-07	4.14274e-06	up	5.232	2.387	8.17856e-07	3.78414e-06	up
g57989	LG14	18996902	18999439	+	Aromatic amino acid lyase	3192	3456	2305	2007	2769	1660	16759	26651	17725	5276	5991	7860	28.3867	21.1267	197.017	61.8867	7.606	2.927	1.04741e-34	1.35167e-32	up	2.341	1.227	1.60232e-13	2.52359e-12	up	9.427	3.237	6.51614e-37	6.35524e-35	up	2.902	1.537	2.52879e-07	1.24841e-06	up
g58128	LG14	19996052	19998088	+	Cytochrome P450	13	13	7	0	2	0	19	71	75	15	37	68	0.146667	0.01	0.756667	0.54	5.728	2.518	0.00031621	0.00138115	up	3.99	1.996	0.00243798	0.00754072	up	83.657	6.386	7.06144e-07	5.16119e-06	up	58.409	5.868	3.04059e-06	1.29639e-05	up
g58144	LG14	20140642	20141267	-	--	42	30	27	49	38	33	117	228	183	113	85	67	1.15667	1.44	6.32667	3.16333	5.983	2.581	2.18118e-10	3.02349e-09	up	2.931	1.552	2.35115e-05	0.000114428	up	4.436	2.149	7.29209e-08	6.24239e-07	up	2.175	1.121	0.00235602	0.00616197	up
g58163	LG14	20331775	20334507	-	EamA-like transporter family	494	484	392	508	511	429	4310	3954	3701	3583	3624	5048	7.10667	7.71	62.2033	64.5267	9.559	3.257	4.4177e-154	1.3595e-150	up	9.744	3.285	8.4397e-113	8.6706e-110	up	8.132	3.024	4.1307e-128	4.6848e-125	up	8.283	3.05	1.056e-109	3.3955e-107	up
g58164	LG14	20339131	20343437	-	EamA-like transporter family	101	141	69	103	124	84	5258	3779	3822	1946	1663	2363	1.81333	1.87667	75.0333	35.4533	45.038	5.493	1.0997e-142	2.5879e-139	up	20.924	4.387	7.6709e-109	6.6815e-106	up	40.305	5.333	1.304e-206	5.1764e-203	up	18.718	4.226	3.654e-151	2.1626e-148	up
g58341	LG14	21544947	21549358	-	Glu/Leu/Phe/Val dehydrogenase, dimerisation domain	233	166	168	512	438	309	1687	1472	1787	1243	1588	1508	2.68333	6.09667	23.5167	21.0033	9.585	3.261	1.14279e-67	6.6257e-65	up	8.431	3.076	9.30249e-60	2.08225e-57	up	3.885	1.958	1.45986e-21	5.60435e-20	up	3.416	1.772	1.40213e-20	2.24281e-19	up
g58374	LG14	21774694	21775593	+	Cupin domain	0	0	2	0	1	0	48	54	7	12	15	6	0.0166667	0.01	0.876667	0.28	57.371	5.842	2.57791e-05	0.000145972	up	17.917	4.163	0.00436653	0.0126093	up	98.444	6.621	1.20551e-05	6.97867e-05	up	30.79	4.944	0.00221524	0.00582964	up
g58535	LG14	22990866	22992376	-	UDP-glucoronosyl and UDP-glucosyl transferase	38	30	44	12	61	26	153	117	153	72	86	79	0.546667	0.5	2.06333	1.18	4.101	2.036	1.1606e-09	1.45229e-08	up	2.309	1.207	0.000662087	0.00236602	up	4.134	2.047	0.000188149	0.000840867	up	2.33	1.22	0.0218808	0.0453668	up
g58540	LG14	23013308	23014866	-	UDP-glucoronosyl and UDP-glucosyl transferase	110	75	77	197	200	165	369	478	392	314	512	504	1.23333	2.71667	5.89333	6.43	5.232	2.387	1.8786e-19	7.91921e-18	up	5.61	2.488	5.31341e-20	1.5427e-18	up	2.19	1.131	1.13609e-06	8.01586e-06	up	2.348	1.231	3.02273e-07	1.47672e-06	up
g58599	LG14	23378144	23378960	+	VQ motif	0	5	5	0	4	0	23	4	37	29	25	27	0.0933333	0.04	0.576667	0.74	6.859	2.778	0.0198594	0.0495712	up	8.703	3.122	0.000127105	0.000532487	up	15.379	3.943	0.00664671	0.0196398	up	19.587	4.292	4.84973e-05	0.000172516	up
g5869	LG2	11295147	11298322	+	--	2	5	1	1	4	0	29	27	18	25	22	15	0.0933333	0.06	0.856667	0.736667	10.117	3.339	0.000146549	0.000696694	up	8.552	3.096	0.000362746	0.00137872	up	14.314	3.839	0.000316231	0.00133683	up	12.112	3.598	0.000624862	0.00183577	up
g58862	LG14	25102479	25109175	+	2OG-Fe(II) oxygenase superfamily	2033	1175	578	554	563	527	3637	4268	3574	4990	3522	2962	15.52	7.02667	48.1767	48.5167	3.405	1.767	1.45379e-07	1.29156e-06	up	3.365	1.751	0.00039207	0.0014784	up	6.92	2.791	7.50279e-74	2.89149e-71	up	6.844	2.775	1.43978e-66	1.58909e-64	up
g58886	LG14	25290965	25293281	+	Acyltransferase	176	131	176	121	88	260	247	430	261	1527	1839	2067	2.01667	1.98	3.93667	22.9433	2.145	1.101	0.000671533	0.0026862	up	12.267	3.617	3.90956e-83	1.76005e-80	up	2.01	1.007	0.0167713	0.0432381	up	11.485	3.522	7.42339e-14	7.14203e-13	up
g58927	LG14	25587405	25588774	-	KR domain	1	2	0	0	0	1	21	8	39	19	7	42	0.0233333	0.01	0.576667	0.556667	25.261	4.659	0.000202663	0.000930297	up	24.14	4.593	0.000121445	0.000510593	up	62.925	5.976	0.000112647	0.000529047	up	60.128	5.91	7.45617e-05	0.000256865	up
g59025	LG14	26157353	26159959	+	Cleavage site for pathogenic type III effector avirulence factor Avr	7	10	4	49	35	40	2887	808	2524	150	292	606	0.143333	0.873333	42.5333	7.33667	319.363	8.319	5.70888e-63	2.89093e-60	up	54.363	5.765	1.01378e-27	5.28897e-26	up	48.753	5.607	2.61999e-50	4.9761e-48	up	8.279	3.049	4.6088e-14	4.50262e-13	up
g59070	LG14	26399760	26403841	+	Glycosyl hydrolase family 9	46	88	41	96	102	158	370	366	210	221	286	244	0.773333	1.62333	4.19667	3.43333	5.893	2.559	1.08996e-12	2.11978e-11	up	4.744	2.246	1.75687e-12	2.4587e-11	up	2.604	1.381	7.97279e-06	4.79007e-05	up	2.094	1.066	7.25729e-05	0.000250627	up
g59115	LG14	26688045	26688791	-	--	55	20	41	28	9	47	377	358	244	178	117	134	1.43667	1.04667	11.9833	5.32667	9.174	3.197	1.36216e-18	5.20969e-17	up	4.003	2.001	6.52232e-08	5.01208e-07	up	11.534	3.528	3.20542e-15	6.77526e-14	up	5.028	2.33	1.967e-07	9.84873e-07	up
g5918	LG2	11704900	11714165	+	Prokaryotic RING finger family 4	0	0	2	15	10	5	30	55	18	28	39	36	0.00333333	0.05	0.176667	0.18	55.865	5.804	7.15599e-06	4.57236e-05	up	56.096	5.81	8.52633e-07	5.44856e-06	up	3.423	1.775	0.0165307	0.0426982	up	3.412	1.771	0.00432034	0.0106862	up
g59194	LG14	27197763	27199011	+	non-haem dioxygenase in morphine synthesis N-terminal	98	48	51	5	30	1	719	534	638	543	546	503	1.4	0.273333	13.4933	11.5933	10.523	3.395	1.0863e-34	1.39286e-32	up	8.903	3.154	2.91968e-35	2.33966e-33	up	50.097	5.647	5.74142e-07	4.26071e-06	up	42.479	5.409	1.70162e-06	7.51963e-06	up
g59195	LG14	27202973	27204230	+	non-haem dioxygenase in morphine synthesis N-terminal	380	293	213	36	89	26	2477	2044	2457	2370	2372	2547	5.59	1	44.44	47.1067	8.68	3.118	4.52862e-56	1.84865e-53	up	9.05	3.178	6.3572e-82	2.76863e-79	up	44.888	5.488	7.13049e-24	3.28358e-22	up	46.849	5.55	8.3613e-25	1.73413e-23	up
g59273	LG14	27724402	27727151	-	Terpene synthase, N-terminal domain	48	33	45	27	10	2	301	161	531	744	331	502	0.5	0.156667	3.96333	6.21667	8.676	3.117	2.59232e-12	4.76809e-11	up	13.387	3.743	1.63113e-38	1.54868e-36	up	25.604	4.678	3.75235e-13	6.38994e-12	up	39.439	5.302	9.61055e-10	6.24548e-09	up
g59283	LG14	27780600	27784861	-	RIO1 family	593	503	515	671	554	671	1460	2408	1249	1334	1383	1380	4.76333	5.71667	15.2467	12.3233	3.511	1.812	2.05708e-11	3.31695e-10	up	2.781	1.476	4.95389e-29	2.83149e-27	up	2.695	1.43	2.79908e-08	2.5443e-07	up	2.134	1.094	5.36569e-19	7.73724e-18	up
g59314	LG14	27976063	27978660	+	P21-Rho-binding domain	79	74	71	38	88	21	320	363	212	255	167	266	1.09667	0.746667	4.37667	3.38333	4.362	2.125	4.36257e-14	1.00071e-12	up	3.312	1.728	1.16778e-13	1.87157e-12	up	5.909	2.563	1.00805e-07	8.44906e-07	up	4.486	2.165	2.12e-07	1.05643e-06	up
g5935	LG2	11831051	11833587	-	Terpene synthase, N-terminal domain	17	8	21	5	7	0	74	59	42	42	55	61	0.183333	0.05	0.68	0.633333	4.074	2.026	0.000156729	0.000740601	up	3.729	1.899	0.00016687	0.000681201	up	14.131	3.821	5.77752e-07	4.2851e-06	up	12.935	3.693	1.80415e-07	9.07786e-07	up
g59352	LG14	28170629	28172142	+	Petal formation-expressed	2	0	0	0	2	0	32	35	23	15	12	10	0.01	0.01	0.436667	0.18	49.618	5.633	6.9087e-06	4.42708e-05	up	20.456	4.354	0.00183407	0.00587463	up	43.935	5.457	1.73614e-05	9.7339e-05	up	17.956	4.166	0.00412184	0.0102411	up
g59431	LG14	28644698	28648132	+	Ring finger domain	154	124	103	121	116	185	488	248	325	355	221	341	2.51667	2.86	6.94333	6.11333	3.006	1.588	2.77406e-09	3.27751e-08	up	2.605	1.381	2.70118e-10	2.88839e-09	up	2.441	1.288	8.78278e-06	5.21941e-05	up	2.113	1.08	7.16178e-06	2.90404e-05	up
g59465	LG14	28817684	28818275	-	--	824	779	795	1174	1048	1211	2944	3199	1751	1990	2585	2599	42.21	61.5867	138.057	128.64	3.578	1.839	9.30818e-17	2.90237e-15	up	3.279	1.713	8.77912e-27	4.35338e-25	up	2.261	1.177	1.30512e-08	1.24626e-07	up	2.07	1.05	1.67471e-13	1.56463e-12	up
g59466	LG14	28818400	28818969	+	--	1288	1301	1383	2087	1796	1930	5316	5731	3431	3797	4627	4861	51.4967	76.64	186.34	174.833	3.958	1.985	1.50222e-22	8.46426e-21	up	3.652	1.869	5.13881e-36	4.26287e-34	up	2.452	1.294	1.16296e-12	1.87276e-11	up	2.261	1.177	2.70597e-21	4.51219e-20	up
g59508	LG14	29050617	29053848	-	AAA domain	1	1	1	0	0	0	10	16	15	30	13	8	0.01	0	0.133333	0.166667	15.178	3.924	0.00125754	0.00464755	up	18.352	4.198	0.000377956	0.0014312	up	74.496	6.219	0.000162358	0.00073596	up	89.964	6.491	3.01656e-05	0.000111049	up
g59584	LG14	29423631	29441034	+	Mycoplasma MG185/MG260 protein	3172	2684	2430	1193	1097	1164	13740	8942	11070	6031	5484	7263	9.60333	4.1	38.9567	22.0667	4.425	2.146	4.04816e-48	1.14991e-45	up	2.468	1.303	1.06603e-30	6.70529e-29	up	9.559	3.257	1.2564e-140	1.8472e-137	up	5.325	2.413	1.4723e-150	8.4684e-148	up
g59658	LG14	29763705	29765395	-	UDP-glucoronosyl and UDP-glucosyl transferase	5	3	2	0	5	0	37	54	18	40	11	15	0.0466667	0.0233333	0.493333	0.3	12.022	3.588	9.71297e-06	6.03834e-05	up	7.092	2.826	0.00111817	0.00377152	up	21.031	4.394	0.000135467	0.000626001	up	12.392	3.631	0.00223936	0.00588663	up
g59680	LG14	29851900	29855340	+	Nitrite/Sulfite reductase ferredoxin-like half domain	917	1033	590	367	359	358	2603	1887	1543	1455	2221	2542	9.71333	4.27667	23.0067	24.48	2.581	1.368	2.39827e-10	3.30139e-09	up	2.707	1.437	4.12994e-10	4.31709e-09	up	5.416	2.437	1.05754e-49	1.94347e-47	up	5.674	2.504	8.23767e-40	3.61658e-38	up
g59778	LG14	30394646	30398148	-	Pyridoxal-dependent decarboxylase, pyridoxal binding domain	42	27	45	37	40	21	130	219	95	100	111	111	0.24	0.21	0.94	0.686667	4.272	2.095	2.21269e-06	1.58013e-05	up	3.076	1.621	1.34151e-06	8.3022e-06	up	4.494	2.168	2.3858e-06	1.58528e-05	up	3.235	1.694	3.34142e-06	1.41652e-05	up
g59797	LG14	30468815	30469613	+	Cyclophilin type peptidyl-prolyl cis-trans isomerase/CLD	120	88	80	104	109	81	325	277	267	301	293	242	2.64333	2.77667	7.98667	7.84667	3.3	1.723	5.34696e-14	1.21675e-12	up	3.192	1.675	1.10218e-12	1.57212e-11	up	2.901	1.536	1.9914e-11	2.77851e-10	up	2.804	1.488	3.39153e-10	2.31722e-09	up
g59807	LG14	30496500	30504470	-	Glycosyl hydrolase catalytic core	19	15	25	17	26	14	145	64	206	33	45	59	0.09	0.09	0.626667	0.206667	7.638	2.933	1.36177e-08	1.4481e-07	up	2.516	1.331	0.005634	0.015755	up	7.15	2.838	8.36e-08	7.09233e-07	up	2.353	1.234	0.0159969	0.034294	up
g59863	LG15	29371	30621	-	Ubiquitin-2 like Rad60 SUMO-like	152	175	139	176	173	199	1711	1931	1482	1232	1122	856	2.96667	3.57	32.7067	20.82	12.065	3.593	1.12153e-81	9.15646e-79	up	7.554	2.917	5.55148e-51	8.68872e-49	up	9.248	3.209	3.52392e-76	1.44208e-73	up	5.788	2.533	1.84995e-44	9.84961e-43	up
g59986	LG15	706700	708726	-	Xyloglucan fucosyltransferase	11	8	8	5	2	9	17	38	21	20	20	35	0.103333	0.06	0.293333	0.286667	3.143	1.652	0.0184534	0.0466142	up	3.013	1.591	0.00962355	0.025087	up	4.806	2.265	0.00771418	0.0222961	up	4.6	2.202	0.00439347	0.0108481	up
g60005	LG15	794518	798142	+	AAA domain	18	10	6	0	0	7	65	16	86	42	22	22	0.0766667	0.0166667	0.39	0.2	5.421	2.439	0.00086353	0.00334906	up	2.767	1.468	0.0188026	0.0447287	up	23.563	4.558	6.43283e-05	0.000318194	up	12.02	3.587	0.000598371	0.00176456	up
g60216	LG15	2089515	2090777	+	Prokaryotic RING finger family 4	69	63	101	88	66	63	402	635	355	354	227	253	1.37667	1.28667	8.17667	4.9	6.527	2.706	2.86616e-15	7.58338e-14	up	3.838	1.94	2.31156e-12	3.197e-11	up	6.402	2.679	6.19338e-18	1.70371e-16	up	3.759	1.91	1.08486e-14	1.11988e-13	up
g60217	LG15	2092215	2092788	+	Prokaryotic RING finger family 4	6	4	18	14	24	22	288	71	187	104	50	73	0.37	0.793333	6.84667	2.91667	20.217	4.337	9.71101e-12	1.63712e-10	up	8.526	3.092	9.00832e-08	6.75658e-07	up	8.685	3.119	1.395e-09	1.52673e-08	up	3.65	1.868	2.86334e-05	0.000105781	up
g60387	LG15	3205194	3206998	+	Plant zinc cluster domain	651	671	647	533	646	528	1301	1325	1105	1428	1421	1350	9.77	8.67667	18.49	21.1633	2.069	1.049	2.06076e-12	3.84339e-11	up	2.329	1.22	1.88617e-21	6.17933e-20	up	2.15	1.104	4.17209e-11	5.58317e-10	up	2.419	1.274	2.00672e-19	2.9832e-18	up
g60446	LG15	3561629	3567958	-	Homeodomain leucine-zipper encoding, Homez	5	3	4	2	10	18	173	10	132	102	96	99	0.0466667	0.12	1.21	1.18667	27.78	4.796	7.15025e-08	6.71154e-07	up	27.007	4.755	2.65561e-19	7.27288e-18	up	9.978	3.319	0.000307589	0.0013046	up	9.702	3.278	5.22912e-10	3.50471e-09	up
g60490	LG15	3833840	3835393	-	--	26	18	35	11	22	27	79	64	41	72	58	83	0.51	0.393333	1.15333	1.36333	2.49	1.316	0.0061164	0.0183533	up	2.895	1.534	0.00013371	0.000557193	up	2.974	1.572	0.00280064	0.00926274	up	3.452	1.788	7.21349e-05	0.000249261	up
g60501	LG15	3891997	3895555	+	Inositol-pentakisphosphate 2-kinase	212	167	185	166	123	171	1165	1054	970	771	707	1052	2.69	2.23	15.16	12.1667	6.166	2.624	5.73685e-59	2.57868e-56	up	4.86	2.281	1.21719e-37	1.09593e-35	up	6.841	2.774	7.71653e-64	2.26895e-61	up	5.388	2.43	5.78257e-42	2.80788e-40	up
g60502	LG15	3896517	3897366	+	Heavy-metal-associated domain	17	43	35	17	20	28	184	199	171	221	142	242	0.93	0.646667	5.40333	5.90333	6.349	2.666	5.76592e-12	1.00289e-10	up	6.811	2.768	3.42296e-15	6.38193e-14	up	8.427	3.075	4.142e-19	1.27061e-17	up	9.031	3.175	4.86214e-22	8.47439e-21	up
g60535	LG15	4101899	4102563	+	Auxin responsive protein	38	23	13	29	21	37	89	114	52	94	68	77	0.803333	0.98	2.82	2.67333	3.821	1.934	0.000164388	0.000772051	up	3.546	1.826	1.22402e-05	6.32565e-05	up	2.9	1.536	0.000947782	0.00356507	up	2.695	1.43	0.000173806	0.000564026	up
g60556	LG15	4221431	4224728	-	Misato Segment II tubulin-like domain	2956	2625	2659	2313	2359	3046	18047	19710	13024	5764	5423	6586	33.75	32.28	207.51	73.68	6.729	2.75	9.25371e-57	3.98059e-54	up	2.346	1.23	6.25461e-36	5.16708e-34	up	6.484	2.697	2.22947e-51	4.38113e-49	up	2.259	1.176	9.13537e-25	1.89083e-23	up
g60650	LG15	4856840	4859869	+	Aldehyde dehydrogenase family	307	270	256	374	334	296	864	582	908	754	636	748	2.59	3.18667	7.32	6.72667	3.087	1.626	1.54529e-14	3.75116e-13	up	2.792	1.481	1.19879e-29	7.15826e-28	up	2.309	1.207	9.5118e-09	9.29749e-08	up	2.087	1.062	1.11137e-14	1.14522e-13	up
g60727	LG15	5316181	5320514	+	AMP-binding enzyme C-terminal domain	1	2	0	1	2	4	5329	7080	4219	1781	1786	2224	0.01	0.0233333	60.7667	21.38	6099.51	12.574	1.06556e-47	2.93985e-45	up	2103.13	11.038	5.30372e-39	5.1957e-37	up	2354.43	11.201	7.65329e-81	3.57409e-78	up	812.25	9.666	1.16455e-66	1.2888e-64	up
g60728	LG15	5323261	5325592	+	AMP-binding enzyme	0	0	2	0	0	0	156	188	114	26	35	26	0.01	0	2.42333	0.47	249.605	7.964	2.6715e-13	5.54898e-12	up	47.473	5.569	3.93407e-06	2.23362e-05	up	819.529	9.679	6.85369e-15	1.40236e-13	up	156.915	7.294	1.18746e-07	6.10655e-07	up
g61049	LG15	7539852	7541549	-	Major intrinsic protein	219	322	184	267	171	115	879	1655	1599	908	1859	1397	4.91333	3.83667	28.7633	29.3	6.409	2.68	8.42296e-17	2.64076e-15	up	6.421	2.683	3.57651e-21	1.15286e-19	up	7.573	2.921	2.81009e-17	7.31452e-16	up	7.59	2.924	1.55949e-09	9.91728e-09	up
g61056	LG15	7605823	7613951	+	Hyaluronan mediated motility receptor C-terminal	286	238	147	34	102	106	1340	1103	1131	772	654	1008	1.88	0.71	10.1067	6.96	5.859	2.551	1.06796e-32	1.1934e-30	up	3.962	1.986	2.35473e-20	7.12052e-19	up	14.389	3.847	1.03154e-29	6.88186e-28	up	9.723	3.281	6.36154e-11	4.69437e-10	up
g61111	LG15	7947408	7948335	-	--	154	237	176	294	180	191	714	739	481	401	677	779	4.49667	5.36	15.2867	15.05	3.711	1.892	4.97977e-14	1.13513e-12	up	3.593	1.845	1.70355e-11	2.11778e-10	up	2.874	1.523	7.17672e-10	8.16977e-09	up	2.779	1.474	1.60353e-08	9.14059e-08	up
g61113	LG15	7956860	7965072	+	Zinc knuckle	0	0	0	0	4	0	35	47	55	38	29	31	0	0.00666667	0.196667	0.136667	275.439	8.106	1.3315e-09	1.65017e-08	up	192.795	7.591	9.50892e-09	8.2951e-08	up	33.798	5.079	8.67741e-07	6.25022e-06	up	23.693	4.566	5.97348e-06	2.44673e-05	up
g61137	LG15	8121682	8123568	+	Cytochrome P450	0	0	0	0	0	0	2	14	3	27	18	2	0	0	0.0866667	0.216667	39.057	5.288	0.013459	0.0358618	up	93.703	6.55	7.91205e-05	0.000346954	up	35.203	5.138	0.0197593	0.0496359	up	84.568	6.402	0.000140559	0.00046316	up
g61156	LG15	8246034	8250417	-	Leucine rich repeat N-terminal domain	70	93	36	65	64	128	138	347	235	134	208	203	0.443333	0.59	1.66	1.26	4.108	2.039	8.07054e-06	5.10858e-05	up	3.047	1.608	6.04978e-06	3.32096e-05	up	2.839	1.505	0.000717788	0.00277625	up	2.109	1.076	0.00162126	0.00439239	up
g61179	LG15	8410101	8413448	+	Ca2+ insensitive EF hand	222	220	58	300	128	185	499	632	596	510	803	1115	1.73333	2.2	6.18333	8.75333	3.897	1.962	1.46192e-06	1.08164e-05	up	5.417	2.438	6.57381e-05	0.000292496	up	2.834	1.503	7.05394e-07	5.1574e-06	up	3.938	1.977	9.32029e-06	3.71874e-05	up
g61582	LG15	11726863	11730906	-	--	2	0	0	0	2	1	13	9	8	9	10	24	0.01	0.0133333	0.13	0.193333	16.492	4.044	0.00956052	0.0268646	up	23.459	4.552	0.00116852	0.00391826	up	9.623	3.267	0.0188956	0.0478111	up	13.776	3.784	0.00300466	0.00767602	up
g61595	LG15	11833895	11835270	-	--	85	74	64	86	66	66	297	369	272	142	200	144	1.28333	1.28667	5.45333	2.89	4.636	2.213	2.37518e-17	7.90509e-16	up	2.415	1.272	1.22542e-05	6.33125e-05	up	4.274	2.096	2.54071e-15	5.4077e-14	up	2.226	1.154	0.000114521	0.000383304	up
g61629	LG15	12083329	12087673	+	--	1	0	0	0	0	0	62	13	56	115	101	99	0.00666667	0	0.706667	1.75667	130.587	7.029	7.34866e-07	5.7474e-06	up	319.322	8.319	1.16351e-11	1.48183e-10	up	229.887	7.845	6.63118e-08	5.70492e-07	up	561.235	9.132	1.416e-13	1.33207e-12	up
g61630	LG15	12089439	12092474	+	Leucine rich repeat	2	14	1	2	0	0	158	24	135	333	284	242	0.0533333	0.00666667	1.00667	2.82333	20.153	4.333	1.05138e-06	7.98567e-06	up	55.946	5.806	1.8661e-10	2.03563e-09	up	153.918	7.266	6.61714e-09	6.62799e-08	up	423.541	8.726	1.08795e-16	1.3164e-15	up
g61631	LG15	12092949	12099818	+	BAR domain of APPL family	2	4	2	10	4	0	217	9	196	584	390	410	0.0366667	0.0633333	1.84	6.19667	56.259	5.814	2.31163e-09	2.76794e-08	up	187.667	7.552	2.64815e-42	3.0143e-40	up	29.283	4.872	0.00213	0.00729699	up	97.297	6.604	5.8627e-15	6.18005e-14	up
g61633	LG15	12122490	12128685	-	Leucine rich repeat	11	6	7	19	2	2	120	16	76	137	76	117	0.0533333	0.05	0.476667	0.763333	9.358	3.226	1.26984e-05	7.69231e-05	up	14.827	3.89	4.29014e-18	1.06107e-16	up	8.967	3.165	0.00083163	0.0031681	up	14.11	3.819	8.54306e-10	5.58286e-09	up
g61637	LG15	12135648	12138845	-	Mitochondrial ATP synthase B chain precursor (ATP-synt_B)	0	2	2	0	0	1	67	4	38	63	46	32	0.03	0.00666667	0.77	1.04667	28.139	4.815	9.12568e-05	0.000456741	up	38.277	5.258	4.7864e-09	4.36352e-08	up	95.908	6.584	3.07153e-05	0.000163306	up	129.096	7.012	9.09642e-08	4.7442e-07	up
g61780	LG15	13241495	13244497	-	Hsp70 protein	1	0	1	1	1	6	29	47	23	34	22	46	0.0133333	0.06	0.76	0.776667	54.481	5.768	3.12292e-06	2.16108e-05	up	54.687	5.773	9.97849e-07	6.2853e-06	up	12.344	3.626	9.08366e-05	0.000435478	up	12.369	3.629	1.66992e-05	6.38763e-05	up
g61781	LG15	13244613	13250827	-	Leucine Rich Repeat	5	0	0	0	4	0	33	60	19	89	45	77	0.02	0.0166667	0.466667	0.876667	25.297	4.661	3.10397e-05	0.000172584	up	45.751	5.516	1.66101e-11	2.06682e-10	up	27.301	4.771	3.79048e-05	0.000196993	up	50.625	5.662	1.32515e-10	9.47063e-10	up
g62022	LG15	15338618	15347957	+	--	6	4	9	1	11	8	150	251	198	66	67	70	0.12	0.13	3.74	1.27	34.837	5.123	1.84336e-24	1.22702e-22	up	11.599	3.536	5.18334e-12	6.89054e-11	up	29.737	4.894	2.4179e-18	6.89501e-17	up	9.901	3.308	2.96947e-08	1.64068e-07	up
g62049	LG15	15554930	15557320	+	Cytochrome P450	68	26	4	54	63	35	362	299	525	101	192	217	0.44	0.723333	5.55333	2.41667	13.818	3.789	5.78255e-05	0.000302829	up	5.923	2.566	0.00810364	0.0216401	up	7.734	2.951	6.61351e-18	1.81176e-16	up	3.317	1.73	3.87881e-06	1.6318e-05	up
g62254	LG15	17174854	17176127	+	--	0	0	0	6	2	0	18	29	22	53	38	34	0	0.0766667	0.686667	1.24333	138.527	7.114	1.02453e-06	7.80245e-06	up	246.203	7.944	1.02916e-09	1.02043e-08	up	8.7	3.121	0.00272508	0.00905001	up	15.414	3.946	1.01703e-06	4.64257e-06	up
g62288	LG15	17450986	17453058	-	--	22	2	8	4	13	6	48	76	32	30	64	34	0.2	0.146667	0.983333	0.84	5.434	2.442	0.0016951	0.00602938	up	4.536	2.181	0.00316133	0.0094923	up	6.653	2.734	7.92735e-05	0.000383939	up	5.563	2.476	0.000256577	0.000809975	up
g62437	LG15	18550528	18557104	-	GDP dissociation inhibitor	0	0	3	3	0	2	46	129	53	84	96	135	0.01	0.0166667	0.7	0.963333	83.597	6.385	2.51259e-09	2.98445e-08	up	113.533	6.827	8.86664e-14	1.4383e-12	up	46.384	5.536	1.66356e-09	1.8072e-08	up	62.025	5.955	3.52451e-15	3.79563e-14	up
g62458	LG15	18739514	18748767	+	Major Facilitator Superfamily	0	0	0	0	0	0	312	0	341	20	52	55	0	0	2.09667	0.423333	1266.51	10.307	0.00834272	0.0239505	up	254.199	7.99	2.97345e-09	2.78488e-08	up	1145.08	10.161	0.00930446	0.0262055	up	229.386	7.842	7.92446e-09	4.66972e-08	up
g62475	LG15	18884345	18890013	-	Major Facilitator Superfamily	0	0	2	0	1	0	31	3	18	107	36	9	0.01	0.00333333	0.21	0.63	26.517	4.729	0.00253228	0.00853588	up	80.365	6.328	1.54568e-06	9.46667e-06	up	45.927	5.521	0.00100895	0.00377265	up	137.228	7.1	7.62724e-07	3.54149e-06	up
g62722	LG15	20784247	20785639	-	--	11	1	12	38	26	25	129	117	124	146	70	100	0.16	0.586667	2.41667	2.06333	16.736	4.065	5.25418e-13	1.05801e-11	up	14.032	3.811	7.49587e-12	9.78615e-11	up	4.113	2.04	3.16463e-09	3.32065e-08	up	3.449	1.786	2.99406e-06	1.27777e-05	up
g62765	LG15	21086506	21088194	+	Syntaxin-like protein	52	26	5	0	0	0	210	147	170	80	68	53	0.44	0	2.86667	1.11667	7.082	2.824	9.10531e-07	7.00361e-06	up	2.721	1.444	0.0180002	0.0430782	up	935.163	9.869	7.03877e-16	1.59295e-14	up	359.09	8.488	2.53237e-11	1.94242e-10	up
g6277	LG2	14550157	14551962	-	--	101	124	105	10	32	8	251	162	198	348	261	304	2.12667	0.336667	3.90333	5.93333	2.003	1.002	5.82998e-05	0.000305113	up	2.999	1.585	9.16906e-16	1.80087e-14	up	11.771	3.557	1.43801e-12	2.29336e-11	up	17.673	4.143	8.2935e-27	1.92105e-25	up
g63292	LG15	24841903	24844048	+	Small nuclear RNA activating complex (SNAPc), subunit SNAP43	63	85	60	68	49	76	135	190	114	165	113	147	1.6	1.51333	3.40667	3.30333	2.325	1.217	0.000397538	0.00169457	up	2.213	1.146	1.5958e-05	8.0741e-05	up	2.265	1.18	0.000750214	0.002889	up	2.154	1.107	8.77891e-05	0.000299478	up
g63506	LG15	26347124	26347676	-	--	9	5	7	0	4	6	22	53	26	73	45	62	0.28	0.136667	1.37	2.41	5.368	2.424	0.000709641	0.00281722	up	9.256	3.21	3.95848e-10	4.14652e-09	up	10.086	3.334	0.000533886	0.00213853	up	17.437	4.124	2.38323e-09	1.48927e-08	up
g63516	LG15	26402381	26407380	+	--	103	107	82	35	36	28	431	511	330	204	138	216	2.45333	0.853333	10.74	4.73	4.783	2.258	3.48598e-19	1.42594e-17	up	2.067	1.048	6.99986e-06	3.80289e-05	up	12.682	3.665	2.06236e-36	1.95383e-34	up	5.477	2.454	8.31714e-17	1.01752e-15	up
g63578	LG15	26857798	26868748	+	C2 domain of PTEN tumour-suppressor protein	0	0	0	0	0	0	1800	0	1317	599	551	521	0	0	4.62667	2.59333	5936.51	12.535	0.00133397	0.00489905	up	3304.36	11.69	1.05395e-22	3.83897e-21	up	5370.94	12.391	0.00151602	0.00540103	up	2981.61	11.542	3.61435e-22	6.35382e-21	up
g63587	LG15	26948116	26964523	-	ACT domain	283	291	270	219	250	231	540	598	492	839	708	893	1.88	1.59667	3.64333	5.49333	2.116	1.082	4.45333e-09	5.11207e-08	up	3.137	1.649	1.16707e-37	1.05555e-35	up	2.299	1.201	3.75494e-10	4.42949e-09	up	3.407	1.768	1.51214e-36	5.60357e-35	up
g63777	LG15	28328043	28332798	-	Eukaryotic-type carbonic anhydrase	51	58	48	44	34	36	535	253	301	120	97	145	1.06333	0.786667	7.25333	2.48	7.411	2.89	8.58634e-22	4.52564e-20	up	2.496	1.32	2.21807e-06	1.32033e-05	up	9.232	3.207	2.57369e-24	1.24135e-22	up	3.104	1.634	1.82217e-07	9.16404e-07	up
g63814	LG15	28653189	28660713	+	--	71	79	65	84	78	101	179	214	139	242	206	212	1.40333	1.75	3.47667	4.36667	2.712	1.439	1.00377e-06	7.66623e-06	up	3.345	1.742	3.0136e-15	5.64204e-14	up	2	1	0.000613821	0.00241674	up	2.466	1.302	1.00707e-08	5.86506e-08	up
g63841	LG15	28830538	28831015	-	--	0	0	0	0	0	0	7	5	8	7	7	15	0	0	0.386667	0.563333	39.612	5.308	0.00609863	0.0183055	up	56.593	5.823	0.000421205	0.0015765	up	35.772	5.161	0.0100189	0.0279087	up	51.051	5.674	0.000982306	0.00277861	up
g63954	LG15	29637524	29644353	+	Elongation factor Tu GTP binding domain	2	4	0	10	3	0	18	65	22	46	27	56	0.0166667	0.04	0.31	0.376667	19.97	4.32	3.25802e-05	0.000180248	up	23.259	4.54	2.3383e-08	1.92222e-07	up	8.284	3.05	0.00425451	0.0133137	up	9.675	3.274	4.19022e-05	0.000150471	up
g64092	LG15	30633765	30637700	-	Ribosomal protein L7Ae/L30e/S12e/Gadd45 family	11	2	5	8	4	3	67	168	73	160	110	144	0.08	0.0666667	1.34667	1.79333	19.242	4.266	3.28542e-10	4.42835e-09	up	24.962	4.642	1.01663e-22	3.7064e-21	up	20.756	4.375	5.36903e-11	7.08079e-10	up	26.974	4.754	4.20866e-22	7.37002e-21	up
g64093	LG15	30639558	30642420	-	Calponin homology (CH) domain	19	21	16	52	47	45	96	177	82	136	90	120	0.43	1.13	2.75	2.67	7.03	2.814	2.04485e-09	2.47143e-08	up	6.689	2.742	1.87655e-15	3.57526e-14	up	2.461	1.299	0.00204956	0.00704821	up	2.343	1.228	4.2593e-05	0.000152712	up
g64112	LG15	30749455	30751144	+	Glycerophosphoryl diester phosphodiesterase family	58	25	42	14	62	22	417	522	169	124	82	112	0.656667	0.536667	5.77667	1.68	9.653	3.271	2.34748e-13	4.9014e-12	up	2.751	1.46	5.35944e-05	0.000243135	up	10.891	3.445	4.65246e-10	5.43015e-09	up	3.108	1.636	0.00106085	0.0029791	up
g64129	LG15	30858680	30859310	-	--	1	2	1	3	1	10	17	39	25	51	35	66	0.0466667	0.163333	0.963333	1.77667	22.654	4.502	1.30518e-05	7.88966e-05	up	40.928	5.355	6.84251e-10	6.96542e-09	up	5.873	2.554	0.00635466	0.0188851	up	10.585	3.404	1.23327e-06	5.55515e-06	up
g64178	LG15	31186364	31199105	+	HhH-GPD superfamily base excision DNA repair protein	5	12	5	0	3	4	30	153	30	17	22	30	0.0866667	0.03	0.866667	0.28	10.982	3.457	2.58849e-05	0.000146488	up	3.43	1.778	0.00995719	0.0258709	up	30.749	4.942	9.93475e-07	7.07753e-06	up	9.63	3.268	0.000543907	0.00161827	up
g64290	LG15	31951093	31956704	-	Alanine dehydrogenase/PNT, C-terminal domain	0	0	0	0	2	0	31	102	6	15	12	6	0	0.0133333	0.83	0.196667	280.595	8.132	2.97963e-07	2.50526e-06	up	65.572	6.035	0.000172679	0.000702838	up	68.748	6.103	3.36405e-05	0.000177245	up	16.084	4.008	0.00822222	0.0189337	up
g652	LG1	3819646	3823447	-	Ferrous iron transport protein B	3	0	2	0	4	0	41	199	33	104	120	178	0.03	0.0233333	1.59667	2.33	61.641	5.946	7.33907e-09	8.13295e-08	up	87.414	6.45	1.79877e-18	4.58468e-17	up	68.085	6.089	1.02491e-07	8.58305e-07	up	98.032	6.615	4.93377e-16	5.6803e-15	up
g662	LG1	3870539	3875792	+	KR domain	58	52	60	40	45	8	176	158	303	139	147	215	1.13	0.633333	4.27333	3.35333	4.138	2.049	2.51822e-08	2.55171e-07	up	3.193	1.675	2.44965e-09	2.31814e-08	up	6.809	2.767	6.65706e-07	4.89084e-06	up	5.25	2.392	2.61645e-07	1.28872e-06	up
g677	LG1	3949789	3955441	+	STAS domain	117	143	50	29	42	40	273	421	124	401	529	345	0.956667	0.356667	2.56333	4.11333	2.933	1.552	0.00120619	0.00448122	up	4.615	2.206	3.04737e-11	3.66334e-10	up	7.252	2.858	3.08859e-10	3.67952e-09	up	11.434	3.515	3.95272e-34	1.32963e-32	up
g6783	LG2	18158467	18163721	-	Transketolase, thiamine diphosphate binding domain	407	263	77	211	198	120	993	1728	1392	558	551	1180	2.13667	1.58667	12.23	6.73333	6.293	2.654	5.53311e-05	0.000290985	up	3.381	1.758	0.0092157	0.0241786	up	7.799	2.963	1.92938e-23	8.55716e-22	up	4.196	2.069	1.31068e-13	1.23698e-12	up
g7126	LG2	20769962	20774372	+	Pyridoxal-phosphate dependent enzyme	1624	1524	1425	811	604	1216	3669	3142	2667	2970	2930	2971	25.69	15.0433	52.9933	50.6633	2.253	1.172	5.42847e-22	2.90329e-20	up	2.12	1.084	9.56331e-26	4.45033e-24	up	3.548	1.827	3.16273e-16	7.4463e-15	up	3.335	1.738	4.81005e-21	7.88868e-20	up
g7193	LG2	21276322	21278503	-	PLAC8 family	896	846	761	465	572	332	1617	2145	919	2738	2146	3571	22.1733	12.4767	41.4567	75.4733	2.048	1.034	0.000191745	0.00088485	up	3.649	1.868	1.24768e-37	1.11836e-35	up	3.357	1.747	1.48785e-08	1.40386e-07	up	5.982	2.581	5.79888e-43	2.9308e-41	up
g7305	LG2	22434486	22438560	+	NB-ARC domain	13	7	13	12	7	10	162	154	152	46	24	32	0.0933333	0.08	1.29333	0.283333	15.482	3.952	3.38885e-23	2.04173e-21	up	3.317	1.73	0.00214949	0.00675851	up	15.972	3.997	5.44297e-23	2.31326e-21	up	3.429	1.778	0.0028709	0.00736333	up
g7312	LG2	22490417	22495221	-	Pathogenesis-related protein Bet v I family	10	1	27	8	3	13	278	583	245	63	58	107	0.396667	0.243333	11.1967	2.29333	31.212	4.964	6.57804e-06	4.23418e-05	up	6.28	2.651	0.00019713	0.000792908	up	46.417	5.537	8.33271e-26	4.35793e-24	up	9.299	3.217	5.60251e-09	3.35863e-08	up
g739	LG1	4347848	4350925	+	Nucleotide-diphospho-sugar transferase	108	96	77	95	81	74	190	224	248	220	130	197	1.04667	0.953333	2.5	2.05	2.613	1.386	6.26843e-07	4.96965e-06	up	2.105	1.074	1.38484e-05	7.08095e-05	up	2.64	1.401	6.20228e-07	4.57365e-06	up	2.127	1.089	2.48389e-05	9.26173e-05	up
g7395	LG2	23176101	23184795	+	Barstar (barnase inhibitor)	0	1	1	0	0	1	4	15	10	13	10	20	0.00666667	0.00333333	0.0966667	0.14	16.21	4.019	0.00938377	0.0264607	up	23.01	4.524	0.000633095	0.0022754	up	27.471	4.78	0.00659355	0.0195045	up	38.817	5.279	0.000531181	0.00158427	up
g762	LG1	4488906	4490106	-	No apical meristem (NAM) protein	33	10	3	25	35	15	128	170	68	89	69	85	0.386667	0.676667	3.19333	2.15	8.945	3.161	3.8279e-06	2.59595e-05	up	5.876	2.555	2.26377e-05	0.000110532	up	4.781	2.257	6.52139e-06	3.99486e-05	up	3.152	1.656	7.28203e-05	0.000251417	up
g7682	LG2	25452477	25456528	+	--	1	3	2	6	10	10	110	66	55	140	83	110	0.0266667	0.106667	0.926667	1.37333	41.184	5.364	1.0899e-12	2.11978e-11	up	59.85	5.903	5.05699e-18	1.2423e-16	up	8.568	3.099	5.49864e-09	5.5695e-08	up	12.433	3.636	5.72644e-16	6.56699e-15	up
g7683	LG2	25456542	25457332	-	B3 DNA binding domain	0	0	0	37	24	13	71	55	136	38	57	105	0	0.703333	2.48	1.88333	526.076	9.039	5.73941e-12	9.98717e-11	up	392.812	8.618	3.01269e-11	3.6249e-10	up	3.553	1.829	0.00119295	0.00437758	up	2.651	1.407	0.00780427	0.0180886	up
g7781	LG2	26119568	26123889	+	Aldo/keto reductase family	6106	3774	5883	4449	4733	4206	24750	25351	26384	15388	16760	19497	61.2233	52.9233	296.747	202.517	5.308	2.408	1.62055e-29	1.51472e-27	up	3.561	1.832	5.18814e-23	1.92119e-21	up	5.653	2.499	1.15327e-80	5.32312e-78	up	3.791	1.922	2.10351e-69	2.55658e-67	up
g7804	LG2	26307410	26308534	-	Sar8.2 family	1250	1099	1913	386	520	916	3434	10054	4882	3455	2923	1964	62.55	26.9633	271.397	122.88	4.776	2.256	0.000183689	0.000851998	up	2.116	1.082	0.00564409	0.0157799	up	10.199	3.35	1.40141e-07	1.1496e-06	up	4.522	2.177	9.70806e-07	4.44698e-06	up
g7810	LG2	26357054	26360074	-	--	7	6	5	4	10	13	39	46	47	168	150	189	0.08	0.126667	0.603333	2.34	8.105	3.019	4.92603e-07	3.97952e-06	up	30.642	4.937	5.12989e-31	3.2939e-29	up	4.84	2.275	0.000309769	0.00131188	up	18.355	4.198	8.11647e-25	1.68507e-23	up
g7835	LG2	26556042	26556598	+	--	360	359	293	367	264	371	574	990	441	761	737	769	13.3367	13.4833	26.6833	30.4267	2.194	1.134	0.000275136	0.00122013	up	2.449	1.292	1.39837e-21	4.62007e-20	up	2.001	1	0.00134336	0.00486096	up	2.233	1.159	3.25381e-14	3.21759e-13	up
g7881	LG2	26961335	26965955	+	Domain of unknown function (DUF4219)	348	351	277	378	331	266	949	949	824	705	989	1028	4.79	4.90667	13.4133	13.6867	3.058	1.613	6.04664e-24	3.89526e-22	up	3.071	1.619	1.43878e-16	3.10602e-15	up	2.756	1.462	3.83924e-16	8.96462e-15	up	2.765	1.467	1.37537e-13	1.29564e-12	up
g7940	LG2	27479234	27481136	+	Elongation factor Tu GTP binding domain	25	26	17	21	35	26	65	69	49	96	54	73	0.41	0.516667	1.11333	1.36333	2.953	1.562	0.00028334	0.00125194	up	3.551	1.828	2.7492e-06	1.60595e-05	up	2.186	1.129	0.0117868	0.0321058	up	2.63	1.395	0.000706774	0.00205661	up
g8065	LG2	28499757	28504451	-	Toxin SpoIISA, type II toxin-antitoxin system	0	1	1	0	0	0	82	144	53	30	22	21	0.00666667	0	0.906667	0.24	153.363	7.261	3.71754e-10	4.96562e-09	up	39.534	5.305	1.22989e-05	6.35192e-05	up	502.681	8.973	9.08506e-12	1.32099e-10	up	129.689	7.019	6.1394e-07	2.88244e-06	up
g8120	LG2	28944243	28950252	+	Helix-loop-helix DNA-binding domain	0	0	0	0	0	0	3	10	14	9	6	20	0	0	0.246667	0.31	55.558	5.796	0.00197455	0.00687903	up	67.579	6.078	0.000163568	0.000669563	up	50.105	5.647	0.0033758	0.0108927	up	60.948	5.93	0.0003836	0.00117271	up
g8138	LG2	29100407	29104259	-	3-Oxoacyl-[acyl-carrier-protein (ACP)] synthase III C terminal	48	30	79	788	946	1701	36855	38328	34753	14872	17031	21092	0.796667	17.51	549.83	268.41	757.626	9.565	3.6912e-250	2.9533e-246	up	362.366	8.501	3.82533e-76	1.40614e-73	up	31.656	4.984	1.44836e-90	8.71104e-88	up	15.178	3.924	5.29254e-25	1.11064e-23	up
g8217	LG2	29687163	29689855	-	AAA domain	53	53	36	6	17	15	93	111	123	108	94	95	0.413333	0.113333	0.976667	0.89	2.557	1.354	0.000115297	0.000564074	up	2.289	1.195	6.50104e-05	0.000289612	up	8.52	3.091	3.95228e-10	4.64984e-09	up	7.638	2.933	3.96283e-11	2.98085e-10	up
g8328	LG2	30540550	30541783	-	--	11	0	2	15	12	17	83	77	33	126	124	183	0.183333	0.65	2.76	6.34333	16.321	4.029	4.39752e-06	2.94087e-05	up	36.494	5.19	3.84333e-19	1.03837e-17	up	4.28	2.098	9.93677e-05	0.00047148	up	9.641	3.269	1.63752e-18	2.27918e-17	up
g837	LG1	4889830	4890703	-	Family of unknown function (DUF5580)	187	238	212	211	167	206	494	643	422	913	757	836	5.37667	5.01333	13.1867	21.37	2.682	1.423	1.03009e-08	1.11353e-07	up	4.269	2.094	2.12585e-42	2.4476e-40	up	2.653	1.407	1.96508e-09	2.11164e-08	up	4.215	2.076	5.11268e-49	3.15864e-47	up
g8510	LG2	31811790	31813782	+	Rap1 Myb domain	48	61	41	102	87	87	166	219	206	285	284	239	1.01333	1.90667	4.04667	5.57667	4.366	2.126	2.15424e-11	3.46202e-10	up	5.913	2.564	4.05973e-24	1.65474e-22	up	2.137	1.095	9.86837e-05	0.000468627	up	2.894	1.533	1.1617e-11	9.21347e-11	up
g8741	LG2	33344626	33346346	+	--	42	71	86	157	61	53	355	211	415	337	301	466	0.896667	1.22	4.37	4.95333	5.315	2.41	1.56444e-10	2.22091e-09	up	5.94	2.57	9.90605e-19	2.58739e-17	up	3.605	1.85	1.61109e-05	9.09834e-05	up	4.013	2.005	3.33812e-09	2.04929e-08	up
g8789	LG2	33719351	33727873	+	Response regulator receiver domain	33	22	33	20	33	23	271	203	190	97	124	143	0.433333	0.383333	3.22667	1.81667	8.152	3.027	4.96949e-23	2.954e-21	up	4.51	2.173	3.63356e-10	3.82115e-09	up	8.505	3.088	2.71532e-21	1.01588e-19	up	4.701	2.233	1.94646e-09	1.22723e-08	up
g8790	LG2	33728711	33731145	+	WRKY DNA -binding domain	844	675	819	628	712	752	8780	7348	6588	5153	3885	5749	12.3133	11.24	118.623	78.1633	10.53	3.396	3.5794e-118	5.5075e-115	up	6.816	2.769	4.21158e-88	2.13602e-85	up	10.633	3.41	6.4222e-164	1.4163e-160	up	6.877	2.782	1.9654e-124	7.8686e-122	up
g9110	LG2	35693783	35694607	+	Plant invertase/pectin methylesterase inhibitor	0	2	0	4	2	2	6681	5795	4734	2462	2564	1345	0.0166667	0.0733333	152.743	58.2967	9354.2	13.191	1.98289e-37	3.02769e-35	up	3529.87	11.785	2.10028e-25	9.55187e-24	up	2110.45	11.043	5.0077e-97	3.75058e-94	up	794.641	9.634	3.23019e-66	3.51763e-64	up
g9114	LG2	35720576	35721328	-	--	37	46	5	60	59	46	596	424	1190	75	178	228	0.906667	1.79	23.8433	5.21667	28.59	4.837	3.22105e-08	3.21102e-07	up	6.147	2.62	7.45115e-06	4.02732e-05	up	13.397	3.744	3.32132e-22	1.3412e-20	up	2.886	1.529	0.000137646	0.000454373	up
g9217	LG2	36384100	36385742	+	3-beta hydroxysteroid dehydrogenase/isomerase family	2	0	0	0	0	8	600	1788	420	363	385	281	0.0133333	0.06	21.6333	7.98	1593.94	10.638	5.52486e-14	1.25083e-12	up	566.787	9.147	3.61187e-18	9.01101e-17	up	356.363	8.477	2.4178e-06	1.60439e-05	up	128.555	7.006	7.50804e-06	3.0342e-05	up
g9321	LG2	37047507	37049648	-	Mature-T-Cell Proliferation I type	12	9	7	31	27	36	194	129	162	55	95	93	0.286667	0.983333	4.94333	2.55333	18.857	4.237	4.77123e-25	3.28525e-23	up	9.604	3.264	2.01348e-11	2.47695e-10	up	5.059	2.339	2.23176e-13	3.90263e-12	up	2.571	1.362	0.000771291	0.002228	up
g9378	LG2	37359380	37361632	-	Glycosyl hydrolases family 18	6	5	1	2	7	6	27	33	23	11	29	35	0.0633333	0.08	0.433333	0.4	7.7	2.945	0.00021549	0.000983198	up	6.986	2.805	0.000808481	0.00282124	up	5.435	2.442	0.00157451	0.00558437	up	4.927	2.301	0.00521612	0.0126311	up
g9385	LG2	37394155	37400702	-	DHH family	8	11	5	16	12	8	108	162	47	659	687	617	0.07	0.106667	0.913333	5.78333	14.538	3.862	2.00272e-10	2.79354e-09	up	89.772	6.488	4.48728e-78	1.7123e-75	up	8.704	3.122	8.39777e-08	7.11981e-07	up	53.905	5.752	1.76189e-81	2.98549e-79	up
g9534	LG3	665130	668968	+	bHLH-MYC and R2R3-MYB transcription factors N-terminal	13	11	23	8	19	26	8792	8776	7796	7367	6598	8611	0.266667	0.303333	141.6	127.343	588.42	9.201	1.6803e-268	1.6805e-264	up	520.532	9.024	2.357e-307	1.8887e-303	up	471.94	8.882	3.5949e-284	3.5675e-280	up	416.87	8.703	0	0	up
g9535	LG3	670260	672074	+	Helix-loop-helix DNA-binding domain	36	12	33	24	18	21	10261	9998	8789	8884	7889	9911	0.476667	0.376667	170.26	158.247	391.093	8.611	1.3281e-242	6.6414e-239	up	356.405	8.477	1.1152e-102	9.309e-100	up	455.087	8.83	0	0	up	415.148	8.697	0	0	up
g9543	LG3	729704	735652	-	Kinase-like	25	31	27	17	14	17	190	189	112	475	315	459	0.32	0.186667	1.87	4.82	6.418	2.682	4.52971e-14	1.03668e-12	up	16.232	4.021	1.23823e-58	2.65306e-56	up	10.042	3.328	1.72144e-17	4.55246e-16	up	25.343	4.664	3.86697e-59	3.3599e-57	up
g9650	LG3	1570833	1576913	-	Leucine rich repeat N-terminal domain	5	2	0	3	1	6	42	76	30	35	24	36	0.0133333	0.0233333	0.29	0.183333	23.772	4.571	2.57166e-07	2.18613e-06	up	14.869	3.894	2.65721e-06	1.55698e-05	up	14.823	3.89	1.52521e-06	1.05219e-05	up	9.294	3.216	3.44296e-05	0.000125626	up
g9673	LG3	1721044	1724493	-	Leucine Rich repeat	5	0	6	0	0	0	8	38	18	111	79	123	0.0266667	0	0.156667	0.743333	6.504	2.701	0.0160752	0.0415943	up	30.577	4.934	1.14998e-17	2.74919e-16	up	118.373	6.887	1.95067e-05	0.0001081	up	551.941	9.108	1.8634e-13	1.72906e-12	up
g9674	LG3	1730180	1733824	-	Leucine rich repeat N-terminal domain	1	5	3	6	0	3	28	69	29	28	37	42	0.0266667	0.0233333	0.343333	0.293333	15.549	3.959	2.9e-06	2.02081e-05	up	12.975	3.698	5.19681e-07	3.4548e-06	up	14.288	3.837	3.8888e-05	0.000201628	up	11.869	3.569	1.16151e-05	4.55778e-05	up
g9689	LG3	1800010	1805294	-	Leucine rich repeat N-terminal domain	0	0	3	92	64	34	208	447	152	679	532	806	0.00666667	0.433333	1.83333	4.57333	295.352	8.206	2.18884e-17	7.33372e-16	up	725.979	9.504	6.79045e-29	3.84284e-27	up	4.26	2.091	1.82643e-05	0.000101869	up	10.367	3.374	1.42943e-37	5.58067e-36	up
g9690	LG3	1807873	1813704	-	Leucine rich repeat N-terminal domain	2	5	0	8	2	0	38	133	28	260	155	237	0.02	0.03	0.593333	1.92667	32.333	5.015	2.58515e-07	2.19619e-06	up	100.639	6.653	2.31438e-27	1.18128e-25	up	20.346	4.347	1.23889e-05	7.15417e-05	up	63.509	5.989	2.07831e-27	4.96036e-26	up
g9745	LG3	2161611	2164835	+	Leucine rich repeat N-terminal domain	0	1	6	0	0	1	19	30	20	12	19	11	0.02	0.00333333	0.163333	0.103333	10.524	3.396	0.00181868	0.00640855	up	6.439	2.687	0.0171842	0.0414372	up	64.024	6.001	3.54486e-05	0.000185638	up	39.174	5.292	0.000543719	0.001618	up
g9834	LG3	2761628	2762451	+	Helix-loop-helix DNA-binding domain	16	25	10	22	19	24	217	177	132	66	57	73	0.45	0.59	4.65667	1.77	11.227	3.489	7.27982e-19	2.88346e-17	up	4.2	2.07	2.10239e-06	1.25782e-05	up	7.914	2.984	2.71091e-18	7.6919e-17	up	2.955	1.563	0.000101478	0.000342513	up
g9838	LG3	2785639	2793123	-	Reverse transcriptase (RNA-dependent DNA polymerase)	350	236	79	236	409	102	720	1047	1297	793	609	652	1.17667	1.40333	5.65333	3.76333	5.261	2.395	2.29229e-08	2.33817e-07	up	3.433	1.779	0.000952866	0.00326898	up	4.075	2.027	0.0014736	0.00526881	up	2.663	1.413	0.0125208	0.0276072	up
g10276	LG3	6049806	6056430	+	Reverse transcriptase-like	13	2	10	10	8	3	0	0	0	0	0	0	0.146667	0.126667	0	0	0.024	-5.377	0.00690922	0.0203702	down	0.024	-5.382	0.0033092	0.00989327	down	0.026	-5.269	0.00917395	0.0258875	down	0.026	-5.275	0.00521796	0.0126348	down
g10283	LG3	6097066	6099545	+	Heavy-metal-associated domain	1304	1261	1164	1887	1586	1565	339	403	198	427	597	549	25.4833	35.15	6.40667	11.0033	0.275	-1.862	6.51495e-14	1.4634e-12	down	0.464	-1.107	3.15934e-10	3.35148e-09	down	0.184	-2.443	5.40247e-25	2.73186e-23	down	0.31	-1.689	3.4118e-25	7.2228e-24	down
g10320	LG3	6319408	6321838	+	Heavy-metal-associated domain	125	112	97	217	167	226	62	34	24	35	22	17	1.94667	3.62667	0.683333	0.436667	0.385	-1.378	0.000372779	0.00159959	down	0.241	-2.05	1.34535e-08	1.14836e-07	down	0.19	-2.393	7.55493e-12	1.11113e-10	down	0.119	-3.069	1.68644e-21	2.847e-20	down
g10452	LG3	7441375	7447831	-	MORN repeat	6082	6940	6044	7426	6484	7108	2974	2467	2852	2361	2216	2569	50.9533	57.3167	22.1567	19.3533	0.475	-1.075	1.36221e-16	4.1663e-15	down	0.408	-1.294	2.9192e-37	2.57629e-35	down	0.389	-1.361	4.66416e-39	5.24487e-37	down	0.334	-1.581	4.87861e-95	1.17193e-92	down
g1055	LG1	6223120	6228962	-	Centrosomin N-terminal motif 1	3972	5285	5611	3148	2699	2659	1431	1521	1245	1200	1152	1199	44.4733	25.7867	12.4833	10.71	0.307	-1.705	1.75247e-17	5.95646e-16	down	0.259	-1.951	1.26267e-32	9.05035e-31	down	0.488	-1.035	1.81227e-14	3.54549e-13	down	0.411	-1.282	2.27652e-38	9.3246e-37	down
g10904	LG3	10997158	10999985	+	Hydrogenase/urease nickel incorporation, metallochaperone, hypA	1500	717	463	1581	1077	937	125	145	113	186	255	138	14.21	19.7267	2.07	3.21667	0.16	-2.645	5.51481e-13	1.10586e-11	down	0.245	-2.031	0.000217825	0.00086859	down	0.106	-3.241	1.86195e-43	2.55744e-41	down	0.162	-2.629	2.22606e-26	5.05875e-25	down
g11051	LG3	12050122	12054529	-	BED zinc finger	28	27	36	203	169	149	0	0	0	2	3	0	0.29	1.67	0	0.0166667	0.007	-7.249	2.33208e-07	2.00247e-06	down	0.06	-4.055	7.4744e-06	4.03825e-05	down	0.001	-9.901	6.55292e-16	1.49065e-14	down	0.009	-6.724	2.89568e-21	4.81477e-20	down
g11188	LG3	12999075	13003793	+	--	42	70	30	26	54	36	8	10	11	2	4	10	0.74	0.636667	0.153333	0.0833333	0.227	-2.141	0.000380918	0.00163102	down	0.123	-3.025	8.84271e-06	4.7002e-05	down	0.246	-2.022	0.00138037	0.00497854	down	0.133	-2.907	5.30508e-05	0.000187619	down
g11217	LG3	13223947	13224585	+	--	177	106	106	60	43	93	35	12	10	46	22	16	4.46	2.29667	0.633333	0.973333	0.156	-2.683	6.30107e-08	5.9592e-07	down	0.235	-2.089	6.89213e-07	4.47781e-06	down	0.278	-1.848	0.00175598	0.00614345	down	0.42	-1.252	0.0123963	0.0273548	down
g11278	LG3	13682784	13684917	-	PCI domain	109	488	78	73	89	115	49	24	35	39	32	24	5.68	2.43667	0.913333	0.826667	0.174	-2.519	5.90735e-05	0.000308597	down	0.156	-2.681	2.6216e-06	1.53769e-05	down	0.379	-1.401	0.000540124	0.00216066	down	0.337	-1.568	3.81801e-05	0.000138211	down
g1177	LG1	7044761	7054292	+	--	35	39	42	35	56	37	20	9	2	12	9	7	0.73	0.83	0.186667	0.18	0.279	-1.843	0.0124717	0.0336654	down	0.262	-1.934	0.000355485	0.00135431	down	0.228	-2.134	0.00433767	0.0135436	down	0.214	-2.228	9.7772e-05	0.000330824	down
g12205	LG3	20492585	20510880	+	Leucine Rich Repeat	56	92	103	64	65	79	12	14	26	34	15	21	0.436667	0.363333	0.09	0.123333	0.227	-2.137	5.91936e-05	0.000309103	down	0.297	-1.752	7.85625e-05	0.000344658	down	0.25	-1.999	6.89634e-05	0.00033861	down	0.327	-1.614	0.000141725	0.000466708	down
g12223	LG3	20662132	20666170	-	X8 domain	161	124	110	105	138	98	59	31	68	52	31	51	1.89667	1.69333	0.763333	0.65	0.438	-1.191	0.00152767	0.00550433	down	0.368	-1.444	1.5846e-06	9.68873e-06	down	0.454	-1.14	0.00437738	0.0136561	down	0.38	-1.394	2.79323e-05	0.000103387	down
g12391	LG3	22021490	22023194	-	Leucine rich repeat	15	11	4	14	15	28	0	0	0	0	0	0	0.17	0.336667	0	0	0.021	-5.607	0.00223364	0.00765763	down	0.02	-5.613	0.000965372	0.00330779	down	0.01	-6.709	1.45519e-05	8.29104e-05	down	0.01	-6.714	5.70162e-06	2.34243e-05	down
g12473	LG3	22653506	22656042	+	B-box zinc finger	234	345	438	186	252	251	87	143	75	98	65	51	5.48667	3.76667	1.63667	1.15333	0.327	-1.615	1.75301e-05	0.000102965	down	0.226	-2.146	4.33221e-11	5.09477e-10	down	0.439	-1.188	0.000494039	0.00199602	down	0.304	-1.72	3.4901e-09	2.13842e-08	down
g12496	LG3	22910793	22916248	+	CBS domain	1323	1533	1297	1586	1272	1391	669	486	576	487	449	461	12.2833	12.8167	5.10333	4.19667	0.453	-1.143	3.93312e-14	9.08456e-13	down	0.367	-1.448	4.62973e-30	2.81914e-28	down	0.401	-1.32	1.10569e-21	4.29456e-20	down	0.324	-1.627	5.91829e-44	3.0906e-42	down
g12575	LG3	23423704	23424728	+	--	273	174	220	209	147	163	73	70	49	111	59	81	5.44	4.30333	1.55667	2.05	0.313	-1.674	2.15399e-08	2.20893e-07	down	0.406	-1.301	2.66862e-06	1.56321e-05	down	0.364	-1.456	5.56255e-07	4.14036e-06	down	0.472	-1.085	8.18225e-05	0.000280412	down
g12606	LG3	23637079	23639635	+	Super-infection exclusion protein B	538	517	390	559	583	582	126	77	123	123	110	154	11.0967	13.6167	2.50667	3.02	0.247	-2.02	5.33717e-17	1.70538e-15	down	0.292	-1.776	1.52169e-21	5.00571e-20	down	0.185	-2.431	1.1428e-28	7.20052e-27	down	0.219	-2.188	7.88822e-39	3.29715e-37	down
g13187	LG4	2817087	2821361	+	Plant protein of unknown function	915	931	972	754	805	829	183	133	183	477	345	394	8.13333	7.03	1.43333	3.53333	0.192	-2.377	1.47484e-35	2.04155e-33	down	0.467	-1.1	2.01022e-14	3.49884e-13	down	0.205	-2.283	9.99661e-36	9.24978e-34	down	0.498	-1.007	2.03117e-13	1.87961e-12	down
g1323	LG1	7952090	7957393	-	MULE transposase domain	82	64	88	131	124	134	23	8	19	17	9	9	0.786667	1.32667	0.163333	0.116667	0.229	-2.125	1.54186e-05	9.17209e-05	down	0.161	-2.633	7.00851e-09	6.21949e-08	down	0.125	-2.996	4.66206e-13	7.8349e-12	down	0.088	-3.507	5.15866e-19	7.4466e-18	down
g13266	LG4	3342274	3344072	+	Chlorophyll A-B binding protein	58148	74382	68915	175832	149303	176410	6808	1882	5806	28880	23426	13141	1832.45	4639.56	129.677	604.8	0.077	-3.703	7.77882e-27	6.07796e-25	down	0.355	-1.493	1.01398e-05	5.33163e-05	down	0.028	-5.157	2.6252e-34	2.26046e-32	down	0.129	-2.95	1.49481e-20	2.38544e-19	down
g13267	LG4	3346965	3349699	-	HSF-type DNA-binding	5309	5522	3302	5459	4630	4999	1114	656	1010	2145	1624	1339	60.7	66.7233	11.9833	22.4433	0.215	-2.216	2.83252e-23	1.73e-21	down	0.397	-1.332	1.17073e-11	1.49008e-10	down	0.181	-2.468	1.9984e-47	3.27795e-45	down	0.333	-1.585	2.27887e-28	5.76236e-27	down
g13293	LG4	3516320	3519877	-	Cytochrome P450	2384	1994	2110	1532	1545	1514	392	345	339	886	467	748	26.1133	18.8833	4.32	8.46333	0.181	-2.467	9.50868e-72	6.33991e-69	down	0.348	-1.524	8.32355e-19	2.19552e-17	down	0.23	-2.117	6.23502e-68	1.99596e-65	down	0.443	-1.175	6.35863e-14	6.14889e-13	down
g13705	LG4	6280911	6282115	+	--	40	44	22	10	19	14	1	0	1	0	0	0	0.966667	0.406667	0.02	0	0.021	-5.595	5.10676e-06	3.36733e-05	down	0.006	-7.447	2.78277e-08	2.25749e-07	down	0.045	-4.471	0.00153602	0.00546591	down	0.013	-6.32	4.7256e-05	0.000168306	down
g13850	LG4	7514754	7516646	-	Fis1 C-terminal tetratricopeptide repeat	350	290	283	211	215	289	108	35	73	129	96	87	6.98333	5.53667	1.60667	2.39333	0.251	-1.996	8.06329e-09	8.8643e-08	down	0.368	-1.441	3.66192e-11	4.35377e-10	down	0.292	-1.777	1.57487e-06	1.08363e-05	down	0.428	-1.223	7.59959e-07	3.52945e-06	down
g13863	LG4	7630358	7636446	-	Retrotransposon gag protein	54	45	57	45	34	44	12	4	5	4	2	2	0.283333	0.226667	0.0366667	0.0133333	0.143	-2.804	3.54331e-06	2.41821e-05	down	0.055	-4.174	1.39306e-09	1.36169e-08	down	0.165	-2.6	5.04807e-05	0.000255684	down	0.064	-3.971	7.05932e-08	3.72697e-07	down
g14003	LG4	8704965	8706760	+	Ammonium Transporter Family	304	165	134	180	99	131	50	37	67	60	53	87	2.44333	1.70333	0.636667	0.826667	0.284	-1.816	5.53235e-06	3.62347e-05	down	0.363	-1.461	1.33094e-05	6.82366e-05	down	0.374	-1.417	0.000192949	0.000859853	down	0.479	-1.063	0.00076821	0.00222014	down
g14114	LG4	9614543	9615778	+	EamA-like transporter family	506	632	547	360	352	348	173	165	184	122	94	143	11.48	7.37667	3.56667	2.46	0.339	-1.561	1.52957e-14	3.71978e-13	down	0.23	-2.119	3.63405e-29	2.10109e-27	down	0.487	-1.039	5.85711e-08	5.07638e-07	down	0.33	-1.598	3.77011e-17	4.73286e-16	down
g14470	LG4	12446331	12457210	-	Myb-like DNA-binding domain	1497	1658	1402	1825	1051	970	608	370	348	41	41	89	10.1467	8.70667	2.91	0.383333	0.313	-1.677	4.56138e-19	1.84321e-17	down	0.041	-4.624	1.4314e-91	8.19314e-89	down	0.336	-1.572	1.21902e-09	1.34451e-08	down	0.043	-4.525	1.78825e-25	3.85162e-24	down
g14519	LG4	12832644	12836899	-	Reverse transcriptase (RNA-dependent DNA polymerase)	22	16	7	15	21	24	3	0	0	0	1	2	0.126667	0.176667	0.00666667	0.01	0.07	-3.834	0.00697463	0.0205373	down	0.074	-3.76	0.00226243	0.00706757	down	0.047	-4.411	0.000560763	0.00223399	down	0.049	-4.353	0.000152258	0.000498737	down
g15362	LG4	19417547	19418793	+	--	48	72	96	99	113	128	20	0	20	36	14	10	2.08333	3.30333	0.376667	0.57	0.195	-2.358	0.00650796	0.0193757	down	0.295	-1.76	0.00116852	0.00391826	down	0.114	-3.138	2.9724e-05	0.000158673	down	0.171	-2.544	1.42804e-08	8.18254e-08	down
g15620	LG4	21305520	21308890	+	Pentapeptide repeats (9 copies)	150	211	253	660	655	705	118	33	69	107	105	40	3.87	12.8733	1.33667	1.61333	0.376	-1.411	0.00114181	0.00427177	down	0.449	-1.156	0.00358449	0.0106118	down	0.105	-3.257	2.69866e-23	1.17847e-21	down	0.124	-3.009	8.72808e-26	1.91114e-24	down
g15752	LG4	22415994	22422020	+	--	540	500	731	553	605	550	255	142	196	243	141	137	9.49	9.27333	3.11333	2.78	0.358	-1.482	2.95538e-08	2.96316e-07	down	0.315	-1.665	1.31808e-10	1.46658e-09	down	0.338	-1.565	1.58238e-13	2.80538e-12	down	0.297	-1.75	1.66383e-16	1.98847e-15	down
g15762	LG4	22485376	22491529	-	Leucine rich repeat	1127	922	937	1090	906	855	265	183	349	332	249	327	8.14667	7.93667	2.18667	2.49667	0.293	-1.77	2.93519e-12	5.34224e-11	down	0.33	-1.6	5.29133e-31	3.39212e-29	down	0.277	-1.851	8.48133e-14	1.54505e-12	down	0.312	-1.683	1.52737e-33	4.94241e-32	down
g15763	LG4	22491973	22493369	-	--	161	92	144	170	153	201	0	0	0	55	46	74	2.10333	2.82	0	0.926667	0.002	-9.366	8.57421e-14	1.8897e-12	down	0.476	-1.072	0.000982597	0.00336005	down	0.001	-9.909	5.6383e-16	1.29222e-14	down	0.326	-1.616	2.71271e-09	1.68562e-08	down
g16269	LG4	26738375	26742503	+	NifU-like domain	214	309	259	700	661	807	115	90	62	132	70	136	5.08667	14.3767	1.71333	2.19333	0.367	-1.444	6.97512e-07	5.48104e-06	down	0.462	-1.113	2.98136e-05	0.00014191	down	0.12	-3.056	1.13745e-45	1.69105e-43	down	0.151	-2.725	5.5575e-44	2.90591e-42	down
g16281	LG4	26864720	26867840	-	Heme oxygenase	126	170	188	72	92	100	17	12	3	66	17	47	2.61667	1.45	0.166667	0.69	0.07	-3.833	1.96804e-14	4.70601e-13	down	0.283	-1.821	7.13542e-06	3.87234e-05	down	0.117	-3.099	2.57703e-08	2.35541e-07	down	0.47	-1.088	0.0125081	0.0275821	down
g16295	LG4	26974188	26976459	-	--	89	99	97	132	164	133	12	5	2	17	4	2	2.04667	3.15333	0.13	0.163333	0.071	-3.82	1.19861e-11	1.99471e-10	down	0.086	-3.532	8.12469e-10	8.17509e-09	down	0.043	-4.554	2.22054e-18	6.36421e-17	down	0.052	-4.269	1.07664e-16	1.3035e-15	down
g16479	LG4	28374155	28378646	+	--	118	161	143	153	192	106	0	0	0	25	46	38	3.35667	3.67333	0	0.89	0.001	-9.456	2.30062e-14	5.45885e-13	down	0.284	-1.817	1.93572e-07	1.38374e-06	down	0.001	-9.702	8.90635e-15	1.79734e-13	down	0.239	-2.063	3.57246e-08	1.95718e-07	down
g16480	LG4	28381902	28386740	-	Leucine Rich repeats (2 copies)	1378	1525	1289	730	775	743	323	332	304	238	283	334	8.68667	4.77333	1.99333	1.80333	0.251	-1.997	6.58171e-39	1.0791e-36	down	0.223	-2.167	1.64856e-42	1.92574e-40	down	0.421	-1.248	1.73371e-15	3.75859e-14	down	0.374	-1.419	4.43847e-18	5.96676e-17	down
g16521	LG4	28679342	28681069	+	Transferase family	23	30	18	46	12	102	4	0	0	0	0	2	0.413333	0.953333	0.02	0.01	0.059	-4.091	0.000563608	0.00229792	down	0.03	-5.036	6.37134e-05	0.000284421	down	0.024	-5.401	7.27434e-06	4.41387e-05	down	0.012	-6.35	6.61844e-07	3.09348e-06	down
g16574	LG4	29006947	29015319	-	Reverse transcriptase-like	70	64	49	26	63	51	18	20	17	7	9	16	0.253333	0.203333	0.08	0.0466667	0.331	-1.597	0.000287046	0.00126607	down	0.191	-2.391	9.34264e-07	5.92203e-06	down	0.385	-1.378	0.0143597	0.0378893	down	0.222	-2.174	0.000281444	0.000881322	down
g16645	LG5	232307	234612	-	Replication factor-A C terminal domain	517	476	450	386	437	438	72	101	37	176	75	143	6.56	5.87667	0.953333	1.78667	0.159	-2.651	1.28559e-15	3.52502e-14	down	0.293	-1.773	8.65975e-14	1.40782e-12	down	0.164	-2.609	8.06373e-15	1.63645e-13	down	0.301	-1.731	5.6064e-13	4.98581e-12	down
g16737	LG5	860350	861727	+	Heavy-metal-associated domain	2180	1667	1395	744	805	915	238	379	193	342	134	275	36.4133	17.61	5.69333	5.22333	0.172	-2.544	6.3799e-20	2.8047e-18	down	0.154	-2.7	3.12694e-29	1.81313e-27	down	0.327	-1.615	3.21397e-09	3.36708e-08	down	0.293	-1.77	1.19322e-14	1.22493e-13	down
g16881	LG5	1693859	1697378	+	AAA domain (Cdc48 subfamily)	277	59	147	119	106	60	0	0	1	9	4	1	1.67667	1.01	0.00333333	0.05	0.002	-8.673	4.90016e-11	7.47638e-10	down	0.032	-4.98	9.89443e-14	1.59855e-12	down	0.004	-8.071	2.75898e-10	3.30869e-09	down	0.048	-4.379	4.04083e-13	3.64353e-12	down
g17181	LG5	3623273	3626058	+	Conserved in the green lineage and diatoms 27	534	451	427	771	602	804	101	140	98	135	184	103	8.34333	13.13	2.02	2.57	0.265	-1.917	4.39926e-15	1.13397e-13	down	0.332	-1.592	5.29635e-10	5.46508e-09	down	0.155	-2.69	1.33796e-31	9.87177e-30	down	0.194	-2.365	4.98502e-24	9.82971e-23	down
g17342	LG5	4812550	4815288	-	--	571	633	535	655	490	588	190	238	162	156	143	166	14.11	14.33	4.80667	3.82333	0.372	-1.425	9.3629e-11	1.37454e-09	down	0.291	-1.781	3.7165e-30	2.28038e-28	down	0.338	-1.565	8.82423e-13	1.44266e-11	down	0.264	-1.922	1.36429e-31	4.03137e-30	down
g17415	LG5	5223049	5225363	-	Transmembrane amino acid transporter protein	216	482	245	568	219	203	103	180	85	133	148	86	4.66333	4.97	1.84333	1.87	0.432	-1.211	0.00325922	0.0106168	down	0.431	-1.216	0.000431486	0.00161047	down	0.375	-1.416	0.00149216	0.00532727	down	0.373	-1.423	0.000113093	0.000378875	down
g17672	LG5	7216502	7222880	-	Cytochrome P450	364	367	254	174	169	166	0	0	0	0	0	2	4.31667	2.29333	0	0.01	0.001	-10.665	1.17631e-18	4.51183e-17	down	0.002	-8.818	3.8496e-17	8.80923e-16	down	0.001	-9.869	6.3268e-16	1.44086e-14	down	0.004	-8.023	3.93862e-14	3.86731e-13	down
g17723	LG5	7569804	7575219	+	Leucine rich repeat N-terminal domain	135	120	56	203	147	187	15	34	21	50	44	40	0.723333	1.29	0.17	0.32	0.254	-1.976	0.000113117	0.000554494	down	0.476	-1.07	0.00449044	0.012914	down	0.131	-2.933	1.66015e-13	2.93933e-12	down	0.246	-2.023	2.73544e-13	2.50369e-12	down
g17860	LG5	8632687	8636919	-	Reverse transcriptase-like	69	61	48	142	137	131	17	4	7	11	10	28	0.853333	2.02333	0.13	0.236667	0.168	-2.576	1.25667e-05	7.62177e-05	down	0.297	-1.749	0.000403797	0.00151673	down	0.066	-3.925	1.27873e-16	3.13135e-15	down	0.116	-3.107	8.71964e-15	9.0722e-14	down
g17893	LG5	8887315	8894336	-	haloacid dehalogenase-like hydrolase	8712	13678	11939	13983	12595	13881	5988	5551	2829	5574	3531	4695	77.18	92.51	31.8133	31.09	0.45	-1.153	1.83147e-05	0.000107101	down	0.432	-1.212	1.79957e-11	2.233e-10	down	0.347	-1.529	2.17106e-12	3.4023e-11	down	0.332	-1.59	7.11506e-53	4.9753e-51	down
g18003	LG5	9662398	9665948	-	--	393	353	353	402	368	263	35	178	71	0	0	0	9.58	9.20667	2.55	0	0.293	-1.772	0.000479818	0.00199991	down	0.001	-10.836	1.24617e-19	3.50633e-18	down	0.28	-1.834	0.000358002	0.00149447	down	0.001	-10.896	1.45734e-19	2.18318e-18	down
g18004	LG5	9666456	9667958	-	--	152	118	105	105	126	154	21	70	35	0	0	0	4.47667	4.73	1.54667	0	0.379	-1.399	0.00473799	0.0147104	down	0.002	-9.278	3.73761e-14	6.31313e-13	down	0.331	-1.597	0.00135747	0.00490664	down	0.001	-9.474	1.35733e-14	1.38817e-13	down
g18087	LG5	10331620	10339204	-	--	148	166	158	212	170	170	29	2	12	22	11	12	3.85333	4.58333	0.333333	0.37	0.095	-3.395	8.87582e-09	9.68304e-08	down	0.103	-3.28	3.80099e-20	1.12477e-18	down	0.074	-3.758	3.97074e-11	5.32856e-10	down	0.08	-3.649	2.08334e-25	4.46603e-24	down
g18090	LG5	10364511	10368144	-	Zinc knuckle	503	477	464	385	357	332	36	7	16	51	63	86	4.87333	3.7	0.19	0.683333	0.043	-4.527	9.52827e-33	1.07374e-30	down	0.151	-2.73	2.33626e-36	1.9874e-34	down	0.053	-4.247	1.20506e-26	6.62535e-25	down	0.183	-2.451	4.45437e-26	9.9292e-25	down
g18092	LG5	10396060	10400935	+	Glycosyl transferase 4-like	563	700	473	545	446	462	243	126	249	174	175	180	6.51333	5.58333	2.32333	2.02667	0.388	-1.366	1.05534e-06	8.00967e-06	down	0.334	-1.584	6.54994e-18	1.5973e-16	down	0.418	-1.259	1.95355e-06	1.31791e-05	down	0.359	-1.479	4.11733e-19	5.98574e-18	down
g1822	LG1	11821703	11826231	-	Cyanobacterial and plastid NDH-1 subunit M	28	50	39	54	19	38	2	0	14	0	0	0	0.69	0.66	0.0966667	0	0.154	-2.702	0.00956005	0.0268646	down	0.005	-7.61	9.52125e-09	8.30405e-08	down	0.149	-2.751	0.0113783	0.0311685	down	0.005	-7.662	1.94962e-08	1.10044e-07	down
g1845	LG1	11973013	11976697	+	--	60	51	49	59	61	40	29	22	13	17	17	10	0.96	0.986667	0.38	0.273333	0.432	-1.212	0.00938462	0.0264612	down	0.302	-1.728	0.000183637	0.000743736	down	0.388	-1.365	0.00609323	0.0182159	down	0.272	-1.881	0.000167542	0.000545043	down
g18506	LG5	13546560	13562146	+	Domain of unknown function (DUF4033)	130	182	111	29	52	46	4	7	6	18	13	10	3.16	0.98	0.126667	0.31	0.044	-4.496	1.08384e-18	4.19737e-17	down	0.106	-3.24	1.09575e-16	2.38475e-15	down	0.132	-2.917	1.32384e-05	7.60496e-05	down	0.315	-1.666	0.00224218	0.00589366	down
g18608	LG5	14276623	14283837	+	Ulp1 protease family, C-terminal catalytic domain	123	133	89	171	107	110	53	16	35	25	25	39	0.736667	0.85	0.22	0.196667	0.324	-1.626	0.000200087	0.000919843	down	0.281	-1.83	6.22499e-08	4.80109e-07	down	0.26	-1.943	1.21433e-05	7.02462e-05	down	0.225	-2.15	1.19171e-09	7.67358e-09	down
g1865	LG1	12142498	12145045	-	Retrotransposon gag protein	48	42	52	18	4	5	0	0	0	0	0	0	0.476667	0.09	0	0	0.004	-7.886	2.59383e-09	3.07456e-08	down	0.004	-7.89	9.61509e-10	9.56187e-09	down	0.02	-5.608	0.00398096	0.0125605	down	0.02	-5.616	0.00193853	0.00517173	down
g19014	LG5	17214398	17217595	-	--	32	31	34	55	69	72	1	0	0	2	2	1	0.496667	1.02667	0.00333333	0.0233333	0.012	-6.372	2.98396e-06	2.07161e-05	down	0.056	-4.156	1.21759e-06	7.56596e-06	down	0.005	-7.534	4.47483e-09	4.59462e-08	down	0.025	-5.321	1.17284e-11	9.29465e-11	down
g19027	LG5	17298730	17299258	+	Auxin responsive protein	57	81	72	26	41	78	13	10	9	11	24	15	2.93	2.06667	0.44	0.723333	0.165	-2.602	9.45597e-08	8.69024e-07	down	0.263	-1.928	3.7298e-05	0.00017452	down	0.216	-2.213	0.000495644	0.00200141	down	0.345	-1.534	0.00979592	0.0221418	down
g19337	LG5	20037124	20040474	-	Protein of unknown function (DUF3119)	328	356	295	491	685	539	169	79	163	101	145	118	7.39	13.3267	3.08667	2.82333	0.455	-1.135	0.000129186	0.000623564	down	0.41	-1.287	2.53004e-08	2.07091e-07	down	0.233	-2.1	1.55945e-12	2.4751e-11	down	0.21	-2.253	1.7116e-22	3.07509e-21	down
g19378	LG5	20307758	20313384	+	Reverse transcriptase-like	44	93	80	97	93	96	14	29	24	16	13	2	0.75	1	0.233333	0.11	0.341	-1.551	0.00385627	0.0122905	down	0.156	-2.679	1.70537e-05	8.56037e-05	down	0.235	-2.09	1.62958e-06	1.11875e-05	down	0.107	-3.218	6.66344e-10	4.40672e-09	down
g19512	LG5	21312839	21314893	+	--	20	11	13	42	38	55	0	0	0	1	0	1	0.233333	0.726667	0	0.0133333	0.014	-6.182	0.000125918	0.000609701	down	0.049	-4.35	0.00113994	0.00383621	down	0.004	-7.952	2.60001e-09	2.7544e-08	down	0.014	-6.112	1.32282e-07	6.76347e-07	down
g19641	LG5	22328450	22330524	+	Aminotransferase class I and II	601	620	821	999	882	987	415	126	306	251	236	96	8.86	12.5767	3.57667	2.56667	0.439	-1.188	0.000895608	0.00345571	down	0.313	-1.678	2.71365e-07	1.89176e-06	down	0.285	-1.809	1.25993e-08	1.20543e-07	down	0.203	-2.302	1.73878e-07	8.76298e-07	down
g19642	LG5	22332970	22336165	+	--	2941	2619	2808	1305	1282	1439	517	411	471	873	416	469	66.61	32.68	11.0967	14.0067	0.182	-2.459	2.83834e-71	1.86144e-68	down	0.226	-2.147	1.29575e-23	5.07001e-22	down	0.342	-1.549	5.40502e-32	4.1102e-30	down	0.424	-1.239	1.02285e-09	6.627e-09	down
g19654	LG5	22412151	22412635	-	--	22	24	6	156	158	146	0	3	0	4	0	0	0.77	7.14667	0.0466667	0.06	0.066	-3.919	0.00571457	0.0173204	down	0.083	-3.587	0.00453581	0.013024	down	0.006	-7.279	6.884e-16	1.5606e-14	down	0.008	-6.881	2.4701e-18	3.39407e-17	down
g19677	LG5	22646452	22648014	-	--	91	90	111	59	61	62	25	22	40	34	20	32	1.38667	0.876667	0.413333	0.406667	0.326	-1.616	0.00012377	0.000600581	down	0.316	-1.662	2.21506e-06	1.31873e-05	down	0.475	-1.074	0.0172839	0.0443437	down	0.459	-1.123	0.00455286	0.0111963	down
g19690	LG5	22748809	22759672	+	4Fe-4S iron sulfur cluster binding proteins, NifH/frxC family	220	301	152	474	332	472	93	60	68	85	92	74	2.16333	4.22	0.71	0.83	0.358	-1.482	2.89347e-06	2.01661e-05	down	0.412	-1.279	1.07875e-05	5.64479e-05	down	0.17	-2.559	9.90741e-27	5.485e-25	down	0.195	-2.361	1.95237e-26	4.44916e-25	down
g19724	LG5	23027664	23037673	+	Tetratricopeptide repeat	269	405	374	232	279	246	103	49	83	124	79	75	2.83667	2.09	0.623333	0.756667	0.241	-2.056	7.29984e-11	1.08602e-09	down	0.286	-1.805	1.65851e-11	2.06435e-10	down	0.302	-1.729	6.01542e-09	6.06354e-08	down	0.358	-1.481	3.79162e-09	2.31378e-08	down
g19770	LG5	23443225	23453818	-	RNase II-type exonuclease C-terminal S1 domain	4947	5531	4845	5441	4678	4945	2229	1646	1987	1682	1504	1565	27.41	27.5	10.4533	8.61667	0.416	-1.265	1.62333e-21	8.37952e-20	down	0.338	-1.566	3.33745e-53	5.66616e-51	down	0.383	-1.386	1.21772e-33	1.01336e-31	down	0.31	-1.688	1.57332e-89	3.31183e-87	down
g19897	LG5	24391414	24394259	-	Methyltransferase domain	24	21	21	134	53	46	5	4	0	1	3	1	0.456667	1.63667	0.06	0.0366667	0.146	-2.779	0.00373096	0.0119425	down	0.084	-3.578	0.000131443	0.000548941	down	0.038	-4.726	5.5351e-09	5.60214e-08	down	0.021	-5.54	3.6807e-11	2.77783e-10	down
g19971	LG5	25021163	25023130	+	GATA zinc finger	184	229	325	52	24	65	6	0	4	5	17	16	3.88333	0.74	0.05	0.203333	0.014	-6.118	9.49275e-24	6.05674e-22	down	0.056	-4.16	4.59344e-22	1.5825e-20	down	0.069	-3.859	6.90484e-06	4.20896e-05	down	0.271	-1.883	0.00257608	0.00667974	down
g19972	LG5	25030503	25034152	+	Thioredoxin-like	894	930	886	631	534	478	93	101	149	94	142	143	13.7233	8.48333	1.76	1.96	0.14	-2.839	4.56429e-30	4.4319e-28	down	0.153	-2.706	1.85373e-41	2.02933e-39	down	0.209	-2.262	2.07028e-17	5.44598e-16	down	0.229	-2.13	1.74515e-22	3.1326e-21	down
g19974	LG5	25041643	25044314	+	Methyltransferase domain	19	16	28	39	33	67	0	0	0	0	0	0	0.37	0.813333	0	0	0.009	-6.725	7.74289e-06	4.91351e-05	down	0.009	-6.728	2.58724e-06	1.51909e-05	down	0.004	-7.992	3.86285e-09	4.00878e-08	down	0.004	-7.998	1.39038e-09	8.88003e-09	down
g19978	LG5	25064153	25066811	+	Methyltransferase domain	50	64	54	176	160	139	8	0	1	3	25	18	1.00667	2.91	0.05	0.29	0.056	-4.169	9.34089e-07	7.17103e-06	down	0.307	-1.706	0.00685787	0.0187125	down	0.018	-5.781	2.8992e-19	8.98391e-18	down	0.097	-3.359	4.07396e-12	3.36166e-11	down
g20002	LG5	25229621	25237205	-	Ribosomal protein L31e	2031	1774	1577	1309	1239	1350	98	84	72	69	46	78	40.6667	30.17	1.91667	1.47	0.051	-4.28	4.6559e-142	1.0348e-138	down	0.039	-4.683	2.6187e-172	5.829e-169	down	0.064	-3.966	4.4751e-138	6.3443e-135	down	0.048	-4.37	7.974e-164	5.6144e-161	down
g20022	LG5	25355410	25356051	+	Photosystem II reaction centre X protein (PsbX)	900	1066	1441	1672	1530	2101	532	315	397	380	300	261	39.54	62.0667	14.1267	10.9467	0.389	-1.361	9.5367e-08	8.75438e-07	down	0.298	-1.749	2.4799e-14	4.27548e-13	down	0.229	-2.126	2.24553e-30	1.55833e-28	down	0.175	-2.518	1.08916e-54	8.07222e-53	down
g20148	LG5	26198965	26201314	+	Myo-inositol oxygenase	82	61	75	58	80	107	0	4	0	0	0	0	1.31	1.50333	0.0233333	0	0.02	-5.626	5.98344e-10	7.78348e-09	down	0.003	-8.504	1.23568e-11	1.5643e-10	down	0.016	-5.944	1.0567e-10	1.34398e-09	down	0.002	-8.823	2.97213e-12	2.48613e-11	down
g20205	LG5	26489479	26490043	-	--	76	60	61	97	84	122	35	21	25	14	29	11	2.56333	4.02667	1.04333	0.733333	0.445	-1.167	0.00382752	0.0122125	down	0.307	-1.705	0.000549774	0.00200453	down	0.262	-1.935	3.19373e-07	2.46692e-06	down	0.18	-2.477	5.62916e-08	3.0077e-07	down
g20320	LG5	27159829	27160685	-	zinc-binding in reverse transcriptase	41	21	37	16	37	36	4	10	3	9	0	6	1.01667	0.933333	0.176667	0.15	0.189	-2.402	0.0016827	0.00599166	down	0.159	-2.652	0.000996047	0.00339966	down	0.189	-2.403	0.00315655	0.0102788	down	0.159	-2.656	0.00194584	0.00519055	down
g20696	LG5	29573230	29574423	+	HSP20-like domain found in ArsA	2085	130	25	128	39	17	0	0	1	5	2	0	16.5833	1.42333	0.00666667	0.0533333	0.001	-10.83	1.76045e-06	1.28282e-05	down	0.004	-8.141	1.94501e-05	9.64491e-05	down	0.006	-7.418	3.17001e-07	2.45146e-06	down	0.038	-4.727	3.45851e-07	1.6736e-06	down
g20723	LG5	29699257	29701802	+	Rubredoxin	1339	1466	1274	1210	1076	1327	259	287	449	274	209	194	28.2233	25.5133	6.99667	4.74667	0.271	-1.885	4.35423e-13	8.81534e-12	down	0.181	-2.469	1.11321e-57	2.27566e-55	down	0.276	-1.857	2.03862e-13	3.58066e-12	down	0.184	-2.441	1.76832e-58	1.50443e-56	down
g20828	LG5	30302998	30309783	+	Regulator of chromosome condensation (RCC1) repeat	334	289	243	137	139	202	42	25	80	44	103	63	3.71	2.10333	0.643333	0.936667	0.188	-2.409	4.47906e-09	5.13571e-08	down	0.272	-1.88	1.50109e-08	1.27182e-07	down	0.307	-1.705	0.000209575	0.000924958	down	0.443	-1.176	0.0015072	0.00411209	down
g20949	LG6	458482	466242	-	--	4956	5013	4296	8225	7123	7658	1952	1681	1622	1748	1471	1553	85.33	140.683	31.4067	28.96	0.402	-1.315	1.81451e-38	2.86915e-36	down	0.365	-1.456	9.56362e-54	1.65166e-51	down	0.225	-2.153	9.6976e-136	1.3274e-132	down	0.204	-2.295	1.5198e-176	1.2666e-173	down
g21176	LG6	2234816	2235566	-	non-haem dioxygenase in morphine synthesis N-terminal	103	135	157	137	98	138	68	47	35	25	9	16	3.90667	3.72333	1.45	0.486667	0.405	-1.304	0.000372916	0.00160001	down	0.135	-2.891	1.7406e-12	2.43763e-11	down	0.393	-1.349	7.4825e-05	0.000364932	down	0.13	-2.939	1.25377e-13	1.1841e-12	down
g21256	LG6	2883573	2886147	+	Domain of unknown function	65	77	72	137	114	90	9	19	18	34	34	13	0.903333	1.46333	0.196667	0.35	0.238	-2.068	3.28784e-05	0.000181746	down	0.417	-1.263	0.00532298	0.0149867	down	0.135	-2.886	3.80444e-10	4.48389e-09	down	0.236	-2.08	8.00852e-07	3.70882e-06	down
g22512	LG6	12342877	12352928	+	GAG-pre-integrase domain	149	122	91	82	57	131	9	21	13	12	12	14	0.6	0.453333	0.0733333	0.0666667	0.133	-2.914	3.07251e-10	4.15537e-09	down	0.115	-3.12	9.37572e-16	1.84055e-14	down	0.16	-2.64	1.33563e-06	9.32589e-06	down	0.139	-2.849	1.34639e-09	8.61258e-09	down
g22790	LG6	14423001	14428601	+	Zinc knuckle	3764	4342	3764	3338	3008	3201	1666	1613	1163	1505	1213	1370	34.06	27.9667	12.6867	11.86	0.407	-1.297	1.09536e-15	3.02206e-14	down	0.374	-1.419	1.19989e-40	1.25853e-38	down	0.457	-1.128	1.11944e-15	2.48107e-14	down	0.42	-1.252	1.31716e-52	9.10133e-51	down
g22840	LG6	14804211	14808410	+	gag-polypeptide of LTR copia-type	68	82	96	91	77	104	0	0	0	12	4	29	0.73	0.816667	0	0.13	0.002	-8.684	1.01057e-11	1.69936e-10	down	0.192	-2.379	1.83378e-05	9.14769e-05	down	0.002	-8.962	1.08774e-12	1.75663e-11	down	0.159	-2.657	4.21052e-07	2.01553e-06	down
g23014	LG6	16015700	16019289	-	--	601	616	512	412	355	496	128	152	149	197	180	210	7.94	5.92667	1.99	2.74	0.274	-1.87	1.8847e-19	7.93659e-18	down	0.37	-1.435	2.1911e-22	7.77598e-21	down	0.338	-1.565	1.34827e-11	1.92397e-10	down	0.457	-1.13	2.4825e-10	1.72412e-09	down
g23026	LG6	16117853	16125601	+	V-type ATPase 116kDa subunit family	303	217	270	125	128	178	61	22	38	42	45	49	1.85667	1.03333	0.276667	0.326667	0.164	-2.61	1.11087e-13	2.40869e-12	down	0.187	-2.415	6.72901e-21	2.1246e-19	down	0.271	-1.882	2.06961e-06	1.38983e-05	down	0.31	-1.687	2.4641e-08	1.37336e-07	down
g23055	LG6	16354584	16361235	-	ERCC3/RAD25/XPB C-terminal helicase	4334	5162	4575	4721	4091	4081	1245	897	1227	1962	1842	1540	32.0567	29.95	7.66	12.3767	0.261	-1.941	2.20981e-31	2.3264e-29	down	0.415	-1.269	3.23864e-18	8.1051e-17	down	0.257	-1.958	6.93125e-42	8.99137e-40	down	0.41	-1.288	5.93485e-26	1.31077e-24	down
g23293	LG6	17940420	17949105	-	NHL repeat	411	312	344	206	277	229	74	99	128	62	43	89	4.05	2.77333	1.16	0.736667	0.313	-1.674	3.07419e-08	3.07457e-07	down	0.196	-2.351	8.69953e-21	2.72529e-19	down	0.422	-1.246	0.000135293	0.000625333	down	0.263	-1.924	7.82973e-12	6.29167e-11	down
g23295	LG6	17954396	17956745	-	6-bladed beta-propeller	92	75	107	70	65	50	19	36	23	29	11	15	1.98333	1.36	0.57	0.396667	0.313	-1.675	0.000194655	0.000897348	down	0.214	-2.221	3.0171e-07	2.08461e-06	down	0.421	-1.247	0.00910487	0.0257237	down	0.288	-1.796	0.000165956	0.000540271	down
g23730	LG6	21140933	21148439	+	--	256	299	272	406	365	448	101	70	93	82	115	107	3.69	5.53667	1.17	1.38333	0.347	-1.529	2.65355e-10	3.62962e-09	down	0.403	-1.312	3.876e-08	3.07951e-07	down	0.213	-2.231	4.51473e-25	2.28879e-23	down	0.247	-2.017	8.99052e-21	1.45117e-19	down
g23905	LG6	22620850	22627796	-	Kinase-like	232	245	236	316	251	333	188	56	90	153	90	85	1.60667	2.06667	0.73	0.743333	0.494	-1.018	0.00669058	0.0198338	down	0.497	-1.007	9.00781e-05	0.000390728	down	0.355	-1.493	4.588e-05	0.00023445	down	0.357	-1.486	2.53963e-09	1.58144e-08	down
g23911	LG6	22697150	22706777	-	Kinase-like	229	221	290	202	254	268	44	22	21	49	66	30	1.53333	1.52667	0.176667	0.306667	0.125	-2.999	8.67734e-18	3.03441e-16	down	0.216	-2.214	6.81631e-11	7.8457e-10	down	0.116	-3.107	3.75045e-20	1.26486e-18	down	0.2	-2.325	9.13145e-13	7.98161e-12	down
g23939	LG6	22863563	22867149	-	Holliday junction DNA helicase RuvB P-loop domain	10839	13309	13629	18577	16188	17659	6919	5102	4312	6325	5499	4680	114.26	161.007	48.63	50.4667	0.464	-1.108	5.61342e-10	7.33393e-09	down	0.475	-1.075	2.24627e-11	2.74478e-10	down	0.304	-1.718	4.03918e-40	4.87341e-38	down	0.311	-1.687	2.22042e-49	1.38647e-47	down
g24014	LG6	23435824	23441372	+	--	195	208	247	192	167	139	11	20	14	102	70	79	3.10667	2.41667	0.216667	1.20333	0.076	-3.722	5.23739e-22	2.80484e-20	down	0.416	-1.265	4.00682e-07	2.71414e-06	down	0.09	-3.475	1.83508e-18	5.31703e-17	down	0.493	-1.02	8.5996e-05	0.000293753	down
g24015	LG6	23444414	23447530	+	--	817	715	689	559	504	561	0	0	7	248	216	215	11.79	8.81	0.04	3.66	0.004	-8.109	7.64301e-08	7.14389e-07	down	0.333	-1.585	9.41956e-28	4.93351e-26	down	0.004	-7.808	2.15576e-07	1.71555e-06	down	0.411	-1.283	1.15357e-17	1.50266e-16	down
g24092	LG6	24099634	24102056	+	Replication protein A OB domain	254	260	210	119	151	132	0	1	0	0	0	0	3.89	2.22333	0.00666667	0	0.002	-9.264	2.01414e-14	4.81336e-13	down	0.001	-10.23	1.80819e-17	4.2492e-16	down	0.003	-8.572	4.11982e-12	6.2565e-11	down	0.001	-9.538	7.07438e-15	7.41521e-14	down
g24370	LG6	25983877	25986320	+	Fructose-1-6-bisphosphatase, N-terminal domain	57	71	30	97	64	97	4	6	0	0	0	6	0.696667	1.17667	0.0433333	0.0266667	0.07	-3.847	2.54093e-06	1.79276e-05	down	0.041	-4.608	2.30235e-07	1.62437e-06	down	0.038	-4.711	5.5539e-12	8.30991e-11	down	0.023	-5.465	6.45321e-13	5.71029e-12	down
g24492	LG6	26782009	26788645	-	Reverse transcriptase-like	1385	1461	1171	1047	969	929	257	466	150	285	234	282	6.67333	5.01333	1.46	1.34667	0.24	-2.058	4.74107e-09	5.42214e-08	down	0.217	-2.204	7.5891e-70	2.2692e-67	down	0.295	-1.762	3.24632e-07	2.50365e-06	down	0.266	-1.908	7.51316e-53	5.2447e-51	down
g24552	LG6	27181390	27185614	+	PAN-like domain	731	808	809	1200	978	1366	349	309	232	329	233	273	8.98333	13.7733	3.37333	3.21333	0.41	-1.286	8.5772e-12	1.4558e-10	down	0.384	-1.38	1.46923e-18	3.76873e-17	down	0.247	-2.019	7.83386e-29	4.96749e-27	down	0.231	-2.115	6.09168e-45	3.29491e-43	down
g24601	LG6	27521852	27524980	+	Kinetochore Sim4 complex subunit FTA2	80	99	84	86	112	69	40	25	23	30	28	26	0.843333	0.88	0.28	0.273333	0.36	-1.473	0.000105711	0.000521265	down	0.348	-1.523	9.13281e-06	4.84347e-05	down	0.319	-1.648	7.46898e-05	0.000364362	down	0.308	-1.698	9.37827e-06	3.74004e-05	down
g24655	LG6	27892461	27894569	+	--	224	244	262	419	296	367	94	65	81	68	121	127	3.99	5.99	1.3	1.75667	0.356	-1.492	4.77619e-09	5.46075e-08	down	0.474	-1.078	0.00020941	0.000838121	down	0.218	-2.195	3.77127e-21	1.38869e-19	down	0.291	-1.783	1.79697e-11	1.39777e-10	down
g24809	LG6	28916450	28919442	+	FAD binding domain	152	143	114	98	91	91	22	26	58	31	27	22	1.55	1.08667	0.416667	0.31	0.29	-1.783	9.90077e-05	0.000491354	down	0.214	-2.224	1.84802e-12	2.58085e-11	down	0.381	-1.391	0.00409439	0.0128765	down	0.281	-1.83	2.70536e-07	1.3292e-06	down
g24810	LG6	28919521	28920365	-	--	1937	1812	1908	2056	1812	2144	557	305	413	728	764	475	63.7433	68.9733	14.1767	22.6333	0.243	-2.044	5.52156e-27	4.3568e-25	down	0.382	-1.387	6.48005e-12	8.50988e-11	down	0.207	-2.274	1.31885e-37	1.34235e-35	down	0.326	-1.619	4.66002e-19	6.74827e-18	down
g24914	LG6	29505669	29511880	-	--	71	39	61	72	40	71	20	16	26	34	16	11	0.48	0.516667	0.173333	0.17	0.397	-1.333	0.00725617	0.0212637	down	0.385	-1.376	0.00814591	0.0217356	down	0.337	-1.567	0.00130767	0.00475045	down	0.327	-1.612	0.00175502	0.00472039	down
g24932	LG6	29606405	29608257	+	ML-like domain	66	155	67	63	90	155	31	15	13	8	14	27	2.31	2.55333	0.466667	0.403333	0.219	-2.188	4.08686e-05	0.000221989	down	0.185	-2.431	4.94397e-06	2.75892e-05	down	0.184	-2.44	2.40385e-06	1.59593e-05	down	0.155	-2.685	1.40005e-07	7.13425e-07	down
g25071	LG6	30458025	30464078	+	Exo70 exocyst complex subunit	41	49	35	24	25	77	20	6	4	6	8	8	0.32	0.33	0.0733333	0.0566667	0.252	-1.987	0.00337329	0.0109367	down	0.193	-2.375	1.75932e-05	8.79816e-05	down	0.225	-2.149	0.00755671	0.021916	down	0.173	-2.533	0.000228586	0.000727119	down
g25241	LG6	31451720	31455143	-	Sigma-70, region 4	1236	1337	1487	1677	1495	1829	619	443	419	605	508	612	12.7333	15.9167	4.57333	5.43667	0.392	-1.35	6.70745e-14	1.50494e-12	down	0.459	-1.123	3.53769e-15	6.58358e-14	down	0.29	-1.788	1.77388e-35	1.61131e-33	down	0.338	-1.564	1.81401e-48	1.09584e-46	down
g25541	LG7	1642065	1648868	-	Multicopper oxidase	331	442	242	250	199	251	52	30	99	27	14	2	2.15667	1.53	0.393333	0.0933333	0.198	-2.334	6.268e-08	5.93084e-07	down	0.047	-4.426	1.34973e-07	9.86312e-07	down	0.258	-1.952	3.88444e-06	2.48138e-05	down	0.061	-4.047	5.50057e-19	7.91775e-18	down
g25552	LG7	1716435	1717168	-	FKBP26_C-terminal	13296	4335	3963	26021	19643	20378	503	627	373	1453	1518	661	213.233	675.107	15.0933	37.4233	0.078	-3.683	1.4976e-10	2.13284e-09	down	0.19	-2.396	0.000452981	0.00168317	down	0.023	-5.47	1.2414e-176	3.5197e-173	down	0.055	-4.182	1.60881e-27	3.87147e-26	down
g25628	LG7	2214359	2216266	-	Mitochondrial 28S ribosomal protein S27	70	24	46	49	85	66	4	5	4	14	16	11	0.566667	0.833333	0.05	0.166667	0.102	-3.293	6.00542e-06	3.90074e-05	down	0.322	-1.633	0.00371955	0.0109695	down	0.064	-3.972	2.98428e-10	3.5638e-09	down	0.202	-2.311	1.6288e-06	7.21344e-06	down
g25672	LG7	2489965	2490737	+	Chlorophyll A-B binding protein	963	1045	1160	1018	921	1112	348	196	235	386	359	281	30.3467	29.6667	7.32333	9.95333	0.263	-1.925	2.28552e-19	9.55405e-18	down	0.353	-1.504	1.08514e-15	2.11677e-14	down	0.249	-2.008	8.53981e-27	4.74109e-25	down	0.332	-1.59	5.44406e-23	1.00871e-21	down
g26261	LG7	6771990	6776240	+	Myo-inositol oxygenase	114	125	99	125	96	74	1	3	3	3	2	2	1.33667	1.19333	0.03	0.0266667	0.023	-5.456	1.84476e-16	5.54052e-15	down	0.023	-5.471	7.3913e-18	1.79483e-16	down	0.024	-5.405	1.08717e-14	2.18066e-13	down	0.023	-5.424	5.85308e-16	6.70657e-15	down
g26266	LG7	6800120	6804313	+	IclR helix-turn-helix domain	457	887	843	71	111	185	57	35	59	50	35	53	8.72333	1.48667	0.596667	0.55	0.074	-3.748	1.62328e-28	1.4148e-26	down	0.068	-3.887	2.97646e-40	3.08958e-38	down	0.404	-1.309	0.00355906	0.0114016	down	0.366	-1.452	0.000228246	0.00072615	down
g26290	LG7	6943512	6954789	+	hAT family C-terminal dimerisation region	69	69	81	43	56	42	26	13	21	15	18	12	0.43	0.283333	0.116667	0.0933333	0.295	-1.762	5.9682e-05	0.000311491	down	0.224	-2.156	4.05869e-07	2.74556e-06	down	0.414	-1.274	0.0107695	0.0296892	down	0.315	-1.666	0.000852625	0.0024429	down
g26321	LG7	7205333	7208541	+	Reverse transcriptase-like	6	23	9	11	4	15	0	0	0	1	0	2	0.126667	0.1	0	0.01	0.016	-5.975	0.000641526	0.00258142	down	0.084	-3.568	0.00647093	0.0177778	down	0.018	-5.769	0.00175424	0.00613891	down	0.097	-3.369	0.0157381	0.0337905	down
g26400	LG7	7939991	7942348	-	--	137	228	178	905	803	820	10	46	16	15	5	18	1.95	9.25333	0.263333	0.136667	0.149	-2.75	8.18892e-07	6.35002e-06	down	0.075	-3.741	9.31663e-20	2.65309e-18	down	0.029	-5.118	2.17922e-34	1.88462e-32	down	0.015	-6.09	1.3623e-106	4.0907e-104	down
g26434	LG7	8237835	8240075	-	--	166	307	199	1056	832	904	37	17	17	26	20	17	2.66	11.2867	0.276667	0.253333	0.113	-3.147	6.8575e-15	1.73191e-13	down	0.102	-3.293	1.25543e-20	3.87736e-19	down	0.025	-5.333	6.19716e-94	4.03272e-91	down	0.022	-5.495	6.7518e-123	2.6259e-120	down
g26437	LG7	8251939	8253363	-	RING-like zinc finger	3475	3891	3568	3676	2797	2993	1586	1124	671	498	344	290	104.693	92.2433	31.74	10.9533	0.331	-1.597	2.13891e-11	3.43919e-10	down	0.112	-3.153	1.10994e-70	3.42092e-68	down	0.346	-1.53	3.56535e-11	4.81546e-10	down	0.118	-3.088	2.66505e-78	4.25128e-76	down
g26453	LG7	8387128	8395177	+	AAA domain	3281	3043	3120	2889	2648	2910	1198	757	1100	725	758	726	32.4367	29.5833	10.4333	7.71	0.351	-1.511	1.79048e-18	6.75738e-17	down	0.256	-1.968	2.68718e-59	5.85147e-57	down	0.355	-1.495	5.01248e-21	1.82541e-19	down	0.258	-1.954	8.90746e-76	1.35729e-73	down
g26514	LG7	8801729	8804093	+	Lipocalin-like domain	43241	39446	40210	57603	54435	60358	14413	11223	11355	19171	16635	14556	837.337	1198.52	250.477	348.15	0.327	-1.614	8.76009e-55	3.27521e-52	down	0.447	-1.161	7.35361e-20	2.11058e-18	down	0.21	-2.249	2.5802e-152	4.2675e-149	down	0.288	-1.796	9.24501e-63	9.03202e-61	down
g26584	LG7	9390163	9392424	+	Cation transport protein	57	46	40	22	57	32	3	0	9	4	3	6	0.693333	0.56	0.06	0.0666667	0.093	-3.424	5.61696e-05	0.000295045	down	0.099	-3.339	4.40617e-08	3.47114e-07	down	0.107	-3.229	0.00102553	0.00382741	down	0.113	-3.148	1.5783e-05	6.06903e-05	down
g2662	LG1	18696989	18703930	-	Nicastrin	1677	1476	1594	1509	1303	1435	723	517	660	627	581	517	14.48	13.1933	5.76667	5.34	0.435	-1.201	2.66601e-14	6.27743e-13	down	0.396	-1.335	3.55054e-21	1.14541e-19	down	0.44	-1.184	3.24861e-17	8.39543e-16	down	0.401	-1.319	8.61803e-26	1.88806e-24	down
g26865	LG7	11795433	11798500	+	PPPDE putative peptidase domain	282	278	257	156	66	204	58	48	38	27	17	32	6.11	3.22	1.07	0.57	0.191	-2.386	1.50743e-21	7.7913e-20	down	0.101	-3.314	6.98281e-35	5.50749e-33	down	0.334	-1.582	0.00035435	0.00148031	down	0.175	-2.516	6.76213e-09	4.01782e-08	down
g2691	LG1	18885172	18892019	+	--	27	11	43	54	33	45	0	0	0	1	4	2	0.223333	0.363333	0	0.0233333	0.007	-7.097	3.00538e-06	2.0848e-05	down	0.094	-3.408	0.000255515	0.00100311	down	0.004	-7.914	3.68652e-09	3.83482e-08	down	0.053	-4.239	3.89462e-08	2.12116e-07	down
g26910	LG7	12206126	12212756	-	AAA domain	2089	2718	1418	4465	3569	2759	746	1038	927	1015	582	906	10.8267	19.33	4.81	4.40667	0.486	-1.041	5.14326e-05	0.000273176	down	0.436	-1.198	1.17362e-08	1.01039e-07	down	0.251	-1.993	5.25829e-19	1.6019e-17	down	0.225	-2.151	1.71883e-36	6.35447e-35	down
g26963	LG7	12654601	12656169	+	--	31	26	19	44	39	26	0	0	0	0	0	0	0.576667	0.853333	0	0	0.008	-6.967	1.31645e-06	9.82181e-06	down	0.008	-6.971	4.45874e-07	2.99695e-06	down	0.005	-7.646	2.9284e-08	2.65395e-07	down	0.005	-7.651	1.16321e-08	6.72832e-08	down
g26995	LG7	13017059	13021393	-	hAT family C-terminal dimerisation region	10	25	13	47	33	34	0	0	0	0	0	0	0.4	0.976667	0	0	0.013	-6.314	9.1111e-05	0.000456068	down	0.013	-6.318	3.21436e-05	0.000152004	down	0.005	-7.705	1.48173e-08	1.39842e-07	down	0.005	-7.711	6.38685e-09	3.8037e-08	down
g26999	LG7	13046168	13050986	+	Protein phosphatase 2C	2348	2576	2019	2841	2590	2704	1133	685	874	1045	1013	930	32.6633	39.1933	12.5867	14.3367	0.42	-1.252	9.63805e-14	2.1104e-12	down	0.472	-1.085	3.71201e-17	8.50366e-16	down	0.323	-1.63	5.71454e-28	3.4214e-26	down	0.362	-1.465	3.39974e-43	1.73544e-41	down
g27250	LG7	14942551	14946305	-	--	120	84	72	37	33	66	3	10	2	0	1	1	1.79667	0.906667	0.0966667	0.0133333	0.06	-4.048	1.55587e-10	2.21032e-09	down	0.008	-6.976	1.77639e-10	1.94679e-09	down	0.111	-3.177	4.18543e-05	0.000215543	down	0.015	-6.107	1.89845e-07	9.52302e-07	down
g27259	LG7	15001920	15009069	+	Rpp14/Pop5 family	159	185	157	126	162	111	8	0	6	13	22	18	4.6	3.76	0.126667	0.5	0.03	-5.055	1.35934e-20	6.48157e-19	down	0.116	-3.108	5.63578e-20	1.63039e-18	down	0.034	-4.883	3.96647e-16	9.2454e-15	down	0.131	-2.932	3.25881e-14	3.22149e-13	down
g27261	LG7	15022141	15022715	-	--	292	198	297	183	219	276	11	19	5	1	4	3	10.1433	8.89	0.446667	0.106667	0.048	-4.368	1.51426e-22	8.52009e-21	down	0.011	-6.501	8.7746e-29	4.90338e-27	down	0.051	-4.296	4.31585e-22	1.73048e-20	down	0.012	-6.43	3.00675e-28	7.54681e-27	down
g27280	LG7	15132492	15137891	+	--	547	355	475	460	500	500	295	42	223	22	28	19	7.98	8.63667	3.16667	0.41	0.431	-1.213	0.0161556	0.0417726	down	0.055	-4.189	9.16395e-47	1.24045e-44	down	0.368	-1.444	0.00284005	0.00937668	down	0.047	-4.426	1.98892e-68	2.35425e-66	down
g27316	LG7	15415595	15423979	+	VIT family	348	368	301	242	164	269	75	52	110	106	114	105	2.38333	1.61333	0.56	0.776667	0.257	-1.963	3.4231e-10	4.59533e-09	down	0.35	-1.515	9.8292e-15	1.7613e-13	down	0.35	-1.515	2.01505e-05	0.000111356	down	0.477	-1.068	1.99041e-05	7.52894e-05	down
g27419	LG7	16199010	16201991	-	--	87	79	98	105	72	119	1	18	2	0	2	0	2.2	2.5	0.18	0.02	0.09	-3.478	2.65494e-05	0.000149719	down	0.008	-6.921	2.28196e-10	2.46246e-09	down	0.073	-3.78	3.40049e-06	2.19627e-05	down	0.007	-7.221	4.02125e-11	3.02256e-10	down
g27646	LG7	17827372	17829974	-	--	63	62	55	32	33	38	5	14	5	3	2	0	1.90667	1.11333	0.256667	0.0533333	0.148	-2.758	4.31147e-06	2.89105e-05	down	0.03	-5.044	1.40283e-10	1.55483e-09	down	0.233	-2.101	0.00249494	0.00838369	down	0.048	-4.387	8.38435e-07	3.87233e-06	down
g27792	LG7	18755747	18761281	-	--	204	183	137	153	155	117	9	3	2	1	0	0	2.24	1.87333	0.06	0.00333333	0.029	-5.114	1.4632e-22	8.25606e-21	down	0.002	-8.797	4.26508e-13	6.38598e-12	down	0.032	-4.973	8.39577e-20	2.73846e-18	down	0.002	-8.654	1.50648e-12	1.29407e-11	down
g27844	LG7	19075776	19097555	-	Pyridine nucleotide-disulphide oxidoreductase	615	807	800	511	417	620	137	72	73	166	128	134	3.71667	2.62667	0.46	0.72	0.135	-2.887	1.03451e-27	8.64001e-26	down	0.208	-2.264	5.96273e-31	3.81643e-29	down	0.177	-2.5	2.8051e-21	1.04553e-19	down	0.272	-1.88	2.47505e-22	4.3945e-21	down
g280	LG1	1457879	1459654	+	Chlorophyll A-B binding protein	186	94	122	844	847	930	73	31	42	61	39	42	2.58333	17.2633	0.92	0.92	0.39	-1.359	0.000900431	0.00347064	down	0.384	-1.38	6.50537e-05	0.000289741	down	0.054	-4.21	1.68734e-67	5.35832e-65	down	0.053	-4.238	1.0973e-111	3.7974e-109	down
g28014	LG7	20417318	20419063	+	Iron dependent repressor, metal binding and dimerisation domain	312	357	325	560	495	497	199	101	140	122	93	118	5.08667	8.1	2.21667	1.71667	0.476	-1.072	2.23421e-05	0.000128033	down	0.363	-1.463	1.57544e-14	2.76978e-13	down	0.276	-1.858	2.29529e-16	5.48203e-15	down	0.21	-2.251	6.74789e-41	3.10319e-39	down
g28106	LG7	21037254	21037702	-	--	136	145	137	118	121	121	66	26	56	59	40	63	6.86667	6.04	2.4	2.67	0.381	-1.391	0.000184609	0.000855615	down	0.418	-1.258	2.97879e-06	1.72973e-05	down	0.4	-1.322	0.000547853	0.00218893	down	0.438	-1.191	3.88732e-05	0.000140596	down
g28230	LG7	21866726	21867091	-	--	426	418	397	307	274	326	27	42	20	194	117	128	24.98	18.6267	1.8	8.89667	0.079	-3.669	1.1043e-33	1.33065e-31	down	0.383	-1.386	9.99328e-12	1.28622e-10	down	0.097	-3.362	7.01886e-26	3.69514e-24	down	0.473	-1.081	6.02051e-07	2.82955e-06	down
g28231	LG7	21868536	21869858	+	Poly(A) polymerase central domain	603	506	505	332	405	374	41	55	19	190	157	168	20.91	14.77	1.48333	6.76	0.078	-3.684	2.56559e-29	2.35342e-27	down	0.347	-1.526	1.29998e-21	4.31176e-20	down	0.102	-3.299	4.11845e-21	1.51092e-19	down	0.453	-1.141	6.94379e-10	4.58174e-09	down
g28291	LG7	22223310	22227002	-	Adenovirus endoprotease	199	254	264	202	156	251	116	28	109	40	56	58	3.36333	2.89	1.16667	0.733333	0.377	-1.408	0.00204638	0.00709773	down	0.234	-2.097	1.30216e-13	2.0745e-12	down	0.405	-1.305	0.00488496	0.015027	down	0.25	-1.997	1.33142e-11	1.05085e-10	down
g28397	LG7	22933615	22934848	+	Regulator of chromosome condensation (RCC1) repeat	333	371	357	371	260	380	153	83	119	148	134	144	6.34667	6.13667	2.1	2.57667	0.361	-1.472	2.18649e-09	2.62595e-08	down	0.436	-1.197	3.14385e-11	3.7714e-10	down	0.344	-1.54	4.16053e-09	4.30084e-08	down	0.415	-1.268	3.98083e-10	2.70132e-09	down
g28548	LG7	23937351	23939354	-	DNA / pantothenate metabolism flavoprotein	92	60	76	47	46	61	23	9	26	19	10	31	1.32333	0.913333	0.333333	0.346667	0.276	-1.855	0.000225645	0.00102416	down	0.282	-1.828	4.99974e-05	0.00022816	down	0.37	-1.436	0.00806228	0.0231492	down	0.376	-1.411	0.00453049	0.0111473	down
g28970	LG7	27092230	27098729	-	PRANC domain	229	231	229	16	19	22	0	1	1	1	0	0	1.50333	0.126667	0.00666667	0.00333333	0.003	-8.304	4.19947e-15	1.08597e-13	down	0.002	-9.203	2.05718e-14	3.57282e-13	down	0.035	-4.837	0.000254326	0.00109793	down	0.019	-5.756	6.29506e-05	0.000219757	down
g28971	LG7	27101886	27104859	-	--	130	138	102	23	30	32	0	0	0	3	0	0	2.51333	0.593333	0	0.02	0.002	-9.256	8.09647e-14	1.7895e-12	down	0.009	-6.826	3.40939e-14	5.78341e-13	down	0.006	-7.291	2.68387e-07	2.09924e-06	down	0.034	-4.875	1.03438e-05	4.0943e-05	down
g29084	LG7	27856998	27859902	-	--	71	68	52	48	55	57	18	0	16	6	0	0	1.60333	1.38333	0.28	0.05	0.191	-2.391	0.00369035	0.0118314	down	0.034	-4.886	1.02384e-09	1.0154e-08	down	0.204	-2.292	0.00767846	0.0222139	down	0.036	-4.791	1.129e-08	6.54066e-08	down
g29128	LG7	28244309	28252007	-	Retroviral aspartyl protease	67	80	73	94	64	58	32	14	43	46	28	23	0.636667	0.633333	0.256667	0.28	0.441	-1.182	0.0158277	0.0410893	down	0.478	-1.066	0.00586148	0.0162956	down	0.408	-1.294	0.0115118	0.0314667	down	0.441	-1.181	0.00472841	0.0115764	down
g29220	LG7	28835338	28836292	-	Ribulose-1,5-bisphosphate carboxylase small subunit	1040	1714	468	385	275	213	79	45	83	31	32	19	29.75	8.36333	1.94333	0.79	0.071	-3.816	4.17308e-21	2.08419e-19	down	0.028	-5.135	4.04556e-19	1.08934e-17	down	0.234	-2.098	2.54057e-10	3.06621e-09	down	0.093	-3.425	3.02875e-26	6.83342e-25	down
g29230	LG7	28925968	28929310	-	Protein of unknown function (DUF2854)	353	323	358	419	310	380	133	68	165	185	110	109	6.55667	7.14	2.31667	2.57667	0.385	-1.376	2.73183e-05	0.000153709	down	0.422	-1.245	1.07257e-07	7.9524e-07	down	0.326	-1.616	4.99751e-07	3.74577e-06	down	0.357	-1.487	8.38561e-11	6.1249e-10	down
g29274	LG7	29268552	29269093	+	--	41	47	40	79	96	83	9	2	15	13	5	4	1.73667	3.59333	0.353333	0.3	0.222	-2.17	0.00215693	0.00743161	down	0.186	-2.43	4.56962e-05	0.000210159	down	0.099	-3.334	3.11955e-08	2.81281e-07	down	0.083	-3.593	2.61736e-12	2.19883e-11	down
g29379	LG7	30029703	30032048	+	Fructose-bisphosphate aldolase class-I	374	581	405	878	918	843	108	23	77	107	93	233	7.47667	14.8733	1.12333	2.38667	0.163	-2.619	1.11059e-09	1.39313e-08	down	0.342	-1.549	6.66817e-07	4.33935e-06	down	0.076	-3.722	1.56016e-23	6.97415e-22	down	0.159	-2.656	2.10542e-26	4.78991e-25	down
g29756	LG7	32627468	32628998	-	Protein of unknown function (DUF3148)	210	244	213	136	205	121	69	61	60	75	41	62	9.22	6.57333	2.62333	2.46667	0.31	-1.688	1.11748e-11	1.86893e-10	down	0.288	-1.798	1.26737e-12	1.79879e-11	down	0.402	-1.315	9.68118e-05	0.000461153	down	0.372	-1.427	1.37152e-05	5.31846e-05	down
g29834	LG7	33134179	33138383	-	CAAD domains of cyanobacterial aminoacyl-tRNA synthetase	123	107	138	306	214	216	42	40	52	44	46	58	1.94667	3.94	0.71	0.786667	0.398	-1.33	9.86538e-05	0.000489841	down	0.436	-1.199	6.01605e-05	0.000269837	down	0.181	-2.467	9.56557e-17	2.3702e-15	down	0.198	-2.337	7.60893e-19	1.08494e-17	down
g29965	LG7	33947275	33949194	+	Manganese-stabilising protein / photosystem II polypeptide	1911	2023	2844	2705	2602	3230	871	593	656	1227	659	682	38.36	48.79	11.77	14.45	0.335	-1.579	1.55716e-12	2.95935e-11	down	0.404	-1.306	5.04621e-08	3.94126e-07	down	0.243	-2.042	2.28665e-46	3.54564e-44	down	0.293	-1.771	1.53767e-22	2.76746e-21	down
g30153	LG7	35057103	35059918	+	Cyclophilin type peptidyl-prolyl cis-trans isomerase/CLD	1118	1297	1228	1132	1034	1148	445	574	376	527	478	451	13.9967	12.9733	5.36333	5.67	0.419	-1.254	6.80001e-09	7.56912e-08	down	0.435	-1.201	1.03878e-16	2.26692e-15	down	0.417	-1.261	1.24981e-10	1.57446e-09	down	0.433	-1.209	7.77149e-23	1.42444e-21	down
g30309	LG8	411033	414085	+	AAA domain	161	282	166	137	161	177	67	63	104	60	67	63	1.57	1.26	0.613333	0.503333	0.425	-1.234	0.00081988	0.00320243	down	0.342	-1.548	2.82573e-07	1.96321e-06	down	0.49	-1.03	0.00223884	0.00761858	down	0.394	-1.344	8.61411e-07	3.97261e-06	down
g30354	LG8	624931	634551	-	Major Facilitator Superfamily	2260	2783	2319	1970	1784	1979	397	552	295	503	602	555	14.5667	11.5767	2.46667	3.35	0.185	-2.431	2.68143e-23	1.64023e-21	down	0.247	-2.016	2.88427e-38	2.68754e-36	down	0.215	-2.217	8.15613e-23	3.42964e-21	down	0.287	-1.803	7.24907e-43	3.65019e-41	down
g30582	LG8	1852184	1854788	+	Glutathione S-transferase, C-terminal domain	3419	2730	3076	3689	2953	2803	1036	1178	770	1351	1272	1137	66.9733	69.8167	21.62	27.7133	0.353	-1.501	9.08183e-15	2.26367e-13	down	0.445	-1.167	5.84806e-17	1.31195e-15	down	0.312	-1.679	4.69252e-20	1.56925e-18	down	0.393	-1.347	5.20884e-26	1.15605e-24	down
g30616	LG8	1991854	1995311	-	short chain dehydrogenase	84	67	105	148	77	403	57	33	18	28	39	6	0.703333	1.73667	0.286667	0.206667	0.445	-1.168	0.0138669	0.03676	down	0.317	-1.656	0.00397325	0.0116134	down	0.166	-2.587	1.1962e-05	6.9298e-05	down	0.119	-3.07	0.00140838	0.00386077	down
g30628	LG8	2063094	2066521	-	Common central domain of tyrosinase	27	28	27	51	18	115	8	0	6	0	0	6	0.303333	0.693333	0.05	0.0233333	0.181	-2.463	0.00658867	0.0195752	down	0.078	-3.688	0.000268022	0.00104708	down	0.074	-3.759	6.78012e-05	0.00033371	down	0.031	-5.009	0.00282365	0.00725673	down
g30643	LG8	2138320	2143361	-	Glutathione S-transferase, C-terminal domain	202	167	148	115	61	117	10	10	23	12	37	25	2.64667	1.52667	0.226667	0.396667	0.092	-3.437	1.64188e-15	4.46009e-14	down	0.16	-2.647	2.28718e-11	2.79221e-10	down	0.148	-2.757	2.11298e-07	1.68525e-06	down	0.256	-1.968	3.68722e-05	0.000133876	down
g30898	LG8	3489271	3490513	-	Ubiquitin-like domain	191	281	161	128	72	125	43	27	45	33	60	50	3.73	1.95333	0.68	0.873333	0.199	-2.331	2.34543e-11	3.74866e-10	down	0.25	-1.998	2.42149e-09	2.29204e-08	down	0.35	-1.514	0.000131998	0.000611608	down	0.441	-1.182	0.00183528	0.00491555	down
g31049	LG8	4364537	4366458	+	--	775	878	765	192	187	167	0	0	0	78	84	86	17.3067	3.99667	0	1.80333	0	-11.97	1.14207e-23	7.24063e-22	down	0.112	-3.161	5.59489e-75	1.98381e-72	down	0.001	-9.971	3.02275e-16	7.13789e-15	down	0.447	-1.161	1.3171e-06	5.90801e-06	down
g31082	LG8	4546107	4550035	+	VDE lipocalin domain	203	287	214	939	764	943	78	10	31	58	64	51	2.61667	10.0267	0.426667	0.656667	0.176	-2.506	2.61876e-06	1.84443e-05	down	0.269	-1.893	1.5192e-12	2.13654e-11	down	0.042	-4.56	2.2202e-11	3.07612e-10	down	0.065	-3.953	4.5846e-101	1.25652e-98	down
g31293	LG8	6046317	6048003	-	--	545	862	750	409	344	407	33	7	13	72	106	40	13.0367	7.12667	0.306667	1.36	0.026	-5.27	5.58075e-40	9.66484e-38	down	0.112	-3.157	1.3974e-21	4.62007e-20	down	0.044	-4.509	1.03083e-31	7.66273e-30	down	0.189	-2.402	1.65552e-14	1.67758e-13	down
g31426	LG8	7004675	7005361	+	--	965	1088	1209	854	864	1121	491	362	339	220	146	123	43.7	38.6233	15.7367	6.58667	0.393	-1.347	1.04185e-12	2.03115e-11	down	0.162	-2.627	3.51504e-33	2.57472e-31	down	0.41	-1.285	2.68918e-13	4.65941e-12	down	0.169	-2.566	2.66122e-36	9.75548e-35	down
g31545	LG8	7762680	7766588	-	Domain of unknown function (DUF1995)	758	802	782	742	668	633	487	275	284	223	135	137	9.83333	8.74333	4.31333	2.09333	0.478	-1.064	3.05748e-07	2.5664e-06	down	0.228	-2.13	2.25856e-27	1.15721e-25	down	0.496	-1.01	7.22221e-07	5.26996e-06	down	0.237	-2.078	1.48643e-27	3.58542e-26	down
g31546	LG8	7774333	7781943	-	Domain of unknown function (DUF1995)	73	60	60	35	33	55	21	12	6	14	12	7	1.42	0.923333	0.28	0.246667	0.216	-2.211	2.57334e-05	0.000145775	down	0.187	-2.418	2.32995e-07	1.6424e-06	down	0.306	-1.71	0.00575829	0.01735	down	0.265	-1.915	0.000771204	0.00222791	down
g31547	LG8	7782476	7784073	-	F-box domain	89	98	97	91	61	70	0	0	0	0	0	0	1.75667	1.39333	0	0	0.002	-8.884	1.42024e-12	2.7211e-11	down	0.002	-8.887	6.41742e-13	9.39447e-12	down	0.002	-8.666	1.22727e-11	1.75935e-10	down	0.002	-8.672	5.84286e-12	4.74646e-11	down
g31574	LG8	7985115	7988397	+	Stress up-regulated Nod 19	72	50	49	28	20	104	20	10	7	2	4	7	0.886667	0.8	0.186667	0.07	0.232	-2.108	9.66814e-05	0.000481362	down	0.083	-3.59	4.14961e-09	3.81511e-08	down	0.235	-2.088	0.00709605	0.0207727	down	0.084	-3.567	8.79684e-06	3.52089e-05	down
g31928	LG8	10931070	10932660	+	--	37	22	67	43	57	63	10	8	18	0	0	1	0.906667	1.18	0.26	0.00666667	0.309	-1.693	0.0148225	0.0388887	down	0.009	-6.777	5.64869e-07	3.7237e-06	down	0.219	-2.191	9.74363e-05	0.000463813	down	0.006	-7.274	1.50459e-08	8.60543e-08	down
g31943	LG8	11065268	11069942	+	--	56	35	41	50	36	29	12	15	12	16	20	14	0.36	0.32	0.106667	0.14	0.325	-1.621	0.00229162	0.00783693	down	0.417	-1.261	0.00878622	0.0232215	down	0.337	-1.57	0.00522681	0.015939	down	0.432	-1.21	0.0212309	0.0442012	down
g32241	LG8	13537146	13539605	-	HSP20-like domain found in ArsA	61	4	5	59	21	51	3	2	3	0	5	2	0.516667	1.00667	0.06	0.0566667	0.129	-2.953	0.0169915	0.0435649	down	0.118	-3.084	0.0167317	0.0405045	down	0.061	-4.042	6.63606e-07	4.87631e-06	down	0.054	-4.2	9.83163e-07	4.49904e-06	down
g32249	LG8	13585500	13587634	+	HSP20-like domain found in ArsA	91	37	10	157	76	65	0	0	0	1	15	0	0.776667	1.74667	0	0.103333	0.005	-7.793	2.48307e-07	2.12028e-06	down	0.141	-2.826	0.0108682	0.0279462	down	0.002	-9.085	2.58633e-12	4.01032e-11	down	0.058	-4.105	0.00767187	0.0178273	down
g32321	LG8	14145254	14152008	+	BNR/Asp-box repeat	788	704	778	825	721	612	269	145	187	220	182	176	11.5133	11.1467	3.00333	2.96	0.285	-1.813	2.7137e-17	8.98688e-16	down	0.277	-1.854	2.19742e-30	1.36081e-28	down	0.271	-1.884	1.15328e-17	3.09949e-16	down	0.263	-1.926	7.81362e-30	2.12581e-28	down
g32369	LG8	14601339	14608419	-	BNR/Asp-box repeat	427	443	383	997	923	1205	116	143	117	113	135	195	6.15	15.68	1.86	2.20333	0.33	-1.6	2.82024e-13	5.83671e-12	down	0.385	-1.378	2.90157e-10	3.09442e-09	down	0.119	-3.067	1.0224e-53	2.26726e-51	down	0.139	-2.845	3.34048e-50	2.14152e-48	down
g32382	LG8	14726001	14726857	+	AP2 domain	107	40	77	75	62	132	22	15	7	4	0	3	2.97333	3.62667	0.57	0.09	0.211	-2.248	0.00011138	0.000546316	down	0.033	-4.9	1.0238e-10	1.15296e-09	down	0.159	-2.655	7.59291e-07	5.52421e-06	down	0.025	-5.306	1.40456e-13	1.32222e-12	down
g32551	LG8	15971249	15973685	-	Glyceraldehyde 3-phosphate dehydrogenase, NAD binding domain	42	75	19	128	78	79	4	4	16	8	1	9	0.703333	1.53	0.133333	0.0933333	0.201	-2.316	0.00464742	0.0144662	down	0.142	-2.814	0.000170702	0.00069564	down	0.085	-3.553	1.4526e-08	1.3714e-07	down	0.061	-4.032	2.21098e-13	2.03907e-12	down
g33148	LG8	20280829	20283068	-	zinc-binding in reverse transcriptase	246	212	217	58	76	74	45	13	18	22	18	0	2.29333	0.723333	0.25	0.14	0.119	-3.067	1.8073e-14	4.3424e-13	down	0.066	-3.924	0.00159317	0.00517615	down	0.347	-1.525	0.00342538	0.011024	down	0.192	-2.383	0.000947461	0.00268728	down
g33166	LG8	20454744	20462006	+	--	86	54	65	81	86	109	36	14	21	2	1	3	0.706667	0.973333	0.24	0.02	0.371	-1.429	0.00252147	0.00850445	down	0.032	-4.978	1.04033e-11	1.33471e-10	down	0.249	-2.007	4.05666e-06	2.58101e-05	down	0.021	-5.558	3.1572e-15	3.41357e-14	down
g333	LG1	1744108	1745371	+	Ribosomal protein L7/L12 dimerisation domain	2536	2975	2607	3982	3402	3841	1205	1115	897	1023	1053	1019	47.3267	66.72	18.67	18.3433	0.431	-1.215	2.52762e-16	7.44057e-15	down	0.416	-1.264	5.76105e-23	2.12549e-21	down	0.282	-1.826	4.05946e-52	8.43667e-50	down	0.272	-1.877	1.81527e-75	2.72686e-73	down
g33458	LG8	22852267	22855410	+	haloacid dehalogenase-like hydrolase	59	93	67	113	80	72	12	22	26	15	17	38	1.22333	1.51	0.34	0.393333	0.305	-1.713	0.000674768	0.00269725	down	0.345	-1.536	0.000813329	0.00283544	down	0.228	-2.132	8.96232e-06	5.31539e-05	down	0.258	-1.955	9.42556e-06	3.75743e-05	down
g33567	LG8	23808726	23811092	+	CobW/HypB/UreG, nucleotide-binding domain	3877	5266	5130	4384	4026	4371	2158	1729	2040	2149	1958	1751	46.9233	42.7	19.3767	19.4733	0.45	-1.151	2.90694e-10	3.94479e-09	down	0.446	-1.165	2.15149e-12	2.98696e-11	down	0.457	-1.13	1.02915e-25	5.35415e-24	down	0.452	-1.146	5.89636e-27	1.37437e-25	down
g33990	LG9	231196	238862	-	Threonyl and Alanyl tRNA synthetase second additional domain	2781	2965	2479	2784	2503	2821	578	744	528	567	522	470	16.66	16.79	3.77	3.21333	0.248	-2.014	1.2653e-26	9.77189e-25	down	0.207	-2.27	6.26367e-71	1.94548e-68	down	0.227	-2.142	7.888e-35	6.9273e-33	down	0.19	-2.4	5.0685e-99	1.36173e-96	down
g34078	LG9	737744	738971	+	mTERF	223	237	159	252	247	227	88	62	64	98	30	49	3.68667	4.45	1.27333	1.05667	0.377	-1.409	1.51086e-07	1.33781e-06	down	0.307	-1.704	2.45559e-06	1.44774e-05	down	0.288	-1.794	5.38233e-14	1.00165e-12	down	0.235	-2.091	3.37004e-10	2.30421e-09	down
g3438	LG1	24558450	24567457	+	C-terminus of AA_permease	1652	1426	1995	1473	1423	1636	686	153	501	869	443	339	12.6	11.4033	3.23667	4.09333	0.279	-1.842	3.06831e-06	2.12697e-05	down	0.349	-1.518	0.000444082	0.00165317	down	0.284	-1.814	0.000844944	0.00321296	down	0.355	-1.493	0.000141235	0.000465132	down
g34403	LG9	2407722	2415271	+	U-box domain	7262	8006	6854	6831	6228	6989	2355	1353	1032	2636	3117	2399	70.7533	65.51	14.84	26.6833	0.228	-2.13	4.10907e-21	2.05994e-19	down	0.406	-1.301	7.0155e-17	1.55642e-15	down	0.228	-2.134	9.60098e-24	4.35555e-22	down	0.404	-1.307	4.34514e-22	7.59275e-21	down
g34521	LG9	3165497	3169032	+	Smr domain	1737	1702	1770	1184	1061	1317	158	103	136	195	140	120	14.7733	10.2833	1.11667	1.3	0.083	-3.598	9.92152e-95	9.68075e-92	down	0.095	-3.399	3.55104e-84	1.65441e-81	down	0.109	-3.192	2.46665e-74	9.79138e-72	down	0.125	-2.995	1.6558e-67	1.87308e-65	down
g34522	LG9	3169537	3174578	+	Transcription initiation factor IID, 18kD subunit	260	186	194	158	177	171	43	26	49	59	34	53	2.5	2.02667	0.463333	0.573333	0.202	-2.31	2.8921e-12	5.2686e-11	down	0.247	-2.019	8.72534e-14	1.4171e-12	down	0.229	-2.125	1.88364e-10	2.3192e-09	down	0.28	-1.835	4.86271e-11	3.62833e-10	down
g34604	LG9	3676558	3677307	-	--	123	99	103	83	134	101	64	22	34	21	15	14	3.19	3.21333	1.15	0.496667	0.393	-1.346	0.00108523	0.00408531	down	0.167	-2.579	1.84763e-12	2.58085e-11	down	0.36	-1.473	0.00103713	0.00386599	down	0.153	-2.707	3.87229e-11	2.91543e-10	down
g34605	LG9	3677965	3679537	-	--	147	148	109	113	133	143	62	14	35	48	34	39	3.29333	3.26667	0.886667	1	0.293	-1.773	0.000142348	0.000679224	down	0.326	-1.616	2.25078e-08	1.85496e-07	down	0.273	-1.874	7.13739e-05	0.000349431	down	0.304	-1.719	1.84115e-08	1.04224e-07	down
g3475	LG1	24851978	24864535	-	Plant mobile domain	20	38	12	12	36	24	0	0	0	0	0	0	0.176667	0.186667	0	0	0.009	-6.843	6.90674e-06	4.42653e-05	down	0.009	-6.847	2.18952e-06	1.30557e-05	down	0.007	-7.066	3.26812e-06	2.11387e-05	down	0.007	-7.07	1.06238e-06	4.83555e-06	down
g34813	LG9	5103089	5108157	+	Domain of unknown function (DUF4283)	285	348	219	85	101	101	12	0	4	4	1	0	1.79333	0.623333	0.0333333	0.01	0.02	-5.64	5.39052e-26	4.00763e-24	down	0.006	-7.287	1.44785e-25	6.66026e-24	down	0.053	-4.244	6.57921e-10	7.52627e-09	down	0.017	-5.879	8.1539e-15	8.5096e-14	down
g35012	LG9	6740074	6743517	-	B3 DNA binding domain	2299	2012	2335	3828	3414	3670	1192	551	686	598	463	300	23.5833	39.3833	8.42333	4.89	0.389	-1.362	3.98148e-09	4.60878e-08	down	0.223	-2.163	1.47138e-22	5.28261e-21	down	0.215	-2.218	6.8886e-27	3.85131e-25	down	0.123	-3.022	9.22059e-60	8.22143e-58	down
g35039	LG9	6926515	6930149	-	OPT oligopeptide transporter protein	314	248	364	957	889	933	71	85	64	0	2	1	2.75667	8.38	0.65	0.01	0.259	-1.951	2.04882e-11	3.3063e-10	down	0.004	-8.156	1.0863e-20	3.37401e-19	down	0.078	-3.676	1.12237e-85	6.02059e-83	down	0.001	-9.883	1.08536e-31	3.22113e-30	down
g3509	LG1	25130347	25133722	+	TRF2-interacting telomeric protein/Rap1 - C terminal domain	875	1048	839	1006	872	972	39	22	17	260	215	218	9.04333	9.53333	0.253333	2.30333	0.03	-5.037	1.01127e-80	8.09115e-78	down	0.273	-1.872	1.27248e-34	9.86157e-33	down	0.027	-5.226	6.1649e-104	5.2067e-101	down	0.239	-2.066	5.99316e-54	4.37041e-52	down
g35165	LG9	7836934	7841081	+	Uncharacterized protein family UPF0016	539	634	654	384	402	362	154	164	145	103	109	114	8.20667	5.25333	2.07667	1.48333	0.276	-1.856	1.50984e-18	5.73611e-17	down	0.194	-2.368	1.13059e-34	8.77894e-33	down	0.398	-1.329	2.03902e-11	2.84096e-10	down	0.279	-1.841	4.46176e-22	7.78653e-21	down
g35180	LG9	7985901	7989256	-	Histidine kinase-, DNA gyrase B-, and HSP90-like ATPase	1534	242	88	440	288	318	55	37	42	8	16	8	6.08667	3.58333	0.446667	0.113333	0.081	-3.626	0.000532554	0.00218982	down	0.02	-5.647	8.64568e-07	5.51866e-06	down	0.126	-2.989	2.72208e-28	1.6598e-26	down	0.03	-5.039	1.59628e-45	8.84495e-44	down
g35332	LG9	9034054	9041577	-	--	451	67	30	277	107	68	0	3	5	6	1	6	2.39667	2.06	0.0366667	0.0566667	0.017	-5.843	0.000106635	0.00052536	down	0.026	-5.267	2.41366e-05	0.000117151	down	0.018	-5.788	5.43468e-13	9.04147e-12	down	0.028	-5.156	9.67667e-16	1.08951e-14	down
g3552	LG1	25534596	25537088	-	NB-ARC domain	80	92	85	96	130	92	33	39	30	55	35	26	0.823333	1.04333	0.33	0.373333	0.434	-1.204	0.000946162	0.00362282	down	0.49	-1.03	0.00543924	0.0152658	down	0.316	-1.664	9.33718e-06	5.51958e-05	down	0.356	-1.49	8.23215e-05	0.000282003	down
g35554	LG9	10851886	10856579	-	Prokaryotic RING finger family 4	47	26	49	50	34	48	11	8	11	0	0	0	1.01333	1.10667	0.25	0	0.266	-1.908	0.0014426	0.0052379	down	0.005	-7.673	7.61307e-09	6.71583e-08	down	0.225	-2.155	9.25031e-05	0.000442505	down	0.004	-7.921	1.446e-09	9.22519e-09	down
g35613	LG9	11255500	11258458	-	Domain of unknown function (DUF3511)	229	255	242	342	257	420	34	10	17	71	69	34	4.13333	5.89333	0.336667	1.01333	0.089	-3.482	5.17104e-20	2.29853e-18	down	0.263	-1.926	5.79051e-10	5.95046e-09	down	0.058	-4.109	1.99796e-27	1.1578e-25	down	0.17	-2.556	4.68578e-17	5.84463e-16	down
g35659	LG9	11584021	11593817	+	PA domain	315	371	323	1253	1315	1302	224	81	159	76	47	64	3.02333	11.8533	1.36667	0.563333	0.492	-1.024	0.00144997	0.00525893	down	0.2	-2.32	1.42867e-25	6.57961e-24	down	0.116	-3.109	9.34413e-31	6.64723e-29	down	0.047	-4.406	1.2479e-159	8.2197e-157	down
g35679	LG9	11799059	11801551	+	--	164	142	92	182	159	150	22	10	23	20	22	18	2.62	3.33333	0.366667	0.406667	0.152	-2.723	2.79981e-10	3.81104e-09	down	0.166	-2.588	8.31377e-13	1.20299e-11	down	0.11	-3.185	5.59326e-17	1.41237e-15	down	0.12	-3.053	5.9033e-21	9.63136e-20	down
g36164	LG9	15541778	15544398	+	Ulp1 protease family, C-terminal catalytic domain	60	69	90	360	288	425	0	0	0	0	0	3	1.38	6.81333	0	0.0166667	0.003	-8.519	4.06394e-11	6.25541e-10	down	0.015	-6.093	1.94522e-10	2.11849e-09	down	0.001	-10.941	1.34806e-19	4.3189e-18	down	0.003	-8.51	8.30242e-23	1.51902e-21	down
g36356	LG9	16910999	16915332	+	--	83	112	72	131	172	189	36	31	39	25	21	31	1.12	2.12	0.446667	0.326667	0.436	-1.199	0.00133802	0.00491033	down	0.314	-1.673	4.30271e-06	2.4271e-05	down	0.212	-2.237	1.56766e-11	2.21847e-10	down	0.153	-2.712	9.50384e-17	1.15612e-15	down
g36408	LG9	17331409	17334873	-	--	222	247	171	217	189	216	74	79	64	25	28	53	4.39	4.37667	1.5	0.736667	0.372	-1.425	8.64011e-08	8.00111e-07	down	0.18	-2.473	7.04747e-15	1.28292e-13	down	0.345	-1.537	5.73687e-10	6.59118e-09	down	0.167	-2.586	4.55739e-17	5.6897e-16	down
g37128	LG9	23075738	23086211	+	AMP-binding enzyme C-terminal domain	259	224	277	363	304	354	61	39	44	129	95	80	2.74	3.73667	0.51	1.10667	0.204	-2.292	1.93249e-16	5.77366e-15	down	0.434	-1.205	1.50375e-06	9.22394e-06	down	0.138	-2.855	9.21045e-33	7.32683e-31	down	0.293	-1.772	1.0279e-15	1.15447e-14	down
g37139	LG9	23182368	23182893	+	Myosin head (motor domain)	96	108	67	67	94	51	0	0	0	0	0	0	4.59667	3.72667	0	0	0.002	-8.803	3.5108e-12	6.30101e-11	down	0.002	-8.807	1.4835e-12	2.08925e-11	down	0.003	-8.615	3.87436e-11	5.20625e-10	down	0.003	-8.619	1.45124e-11	1.14058e-10	down
g37246	LG9	24038977	24048620	+	PIF1-like helicase	20	16	6	22	10	46	0	0	0	0	0	0	0.143333	0.27	0	0	0.015	-6.095	0.000288101	0.00127017	down	0.015	-6.1	0.000106371	0.000454125	down	0.007	-7.15	3.62082e-06	2.32495e-05	down	0.007	-7.156	1.02112e-06	4.65969e-06	down
g37281	LG9	24435336	24437493	-	FAR1 DNA-binding domain	84	72	133	30	11	15	0	0	0	0	2	0	1.61	0.31	0	0.0133333	0.002	-8.925	4.03247e-12	7.1921e-11	down	0.007	-7.061	2.08082e-10	2.25706e-09	down	0.01	-6.669	2.3051e-05	0.000126017	down	0.036	-4.777	0.000435255	0.00131878	down
g37310	LG9	24773390	24781799	-	A-macroglobulin TED domain	41	10	45	34	22	112	0	2	1	0	0	0	0.483333	0.843333	0.0166667	0	0.034	-4.86	5.47707e-05	0.000288417	down	0.006	-7.335	3.17949e-07	2.1885e-06	down	0.018	-5.793	4.543e-07	3.42191e-06	down	0.003	-8.266	1.95353e-09	1.23112e-08	down
g37313	LG9	24793898	24796829	-	Beta-ketoacyl synthase, N-terminal domain	394	419	325	245	247	297	157	31	142	115	62	86	8.82	6.27	2.53333	2.05333	0.312	-1.682	0.00023579	0.00106532	down	0.25	-2	1.40702e-19	3.94507e-18	down	0.405	-1.304	0.00553323	0.0167486	down	0.324	-1.625	1.71526e-11	1.33675e-10	down
g37937	LG9	29683512	29685917	+	Rieske [2Fe-2S] domain	2817	3855	3196	5134	4322	4835	953	968	1025	971	736	710	67.4833	99.5833	20.22	16.71	0.327	-1.612	5.76897e-19	2.3125e-17	down	0.266	-1.911	6.35338e-32	4.38898e-30	down	0.205	-2.289	5.85073e-71	2.03723e-68	down	0.166	-2.589	1.9256e-111	6.553e-109	down
g38031	LG9	30452132	30455844	+	26S proteasome subunit RPN7	2318	2477	2578	2754	2362	2332	1131	908	945	1107	855	1078	21.48	22.0667	8.63333	8.90667	0.439	-1.189	9.99556e-18	3.4681e-16	down	0.445	-1.167	3.08893e-22	1.08375e-20	down	0.394	-1.344	1.47449e-33	1.21683e-31	down	0.399	-1.324	5.20587e-42	2.53993e-40	down
g38094	LG9	30948654	30955077	+	Alpha/beta hydrolase family	559	847	704	679	684	649	271	425	246	263	227	190	6.10667	5.94333	2.74333	1.99333	0.491	-1.026	0.000420511	0.00177922	down	0.351	-1.511	1.85195e-12	2.58544e-11	down	0.466	-1.103	1.27923e-05	7.37281e-05	down	0.333	-1.589	1.95537e-21	3.28606e-20	down
g38312	LG10	967708	975515	-	MA3 domain	961	779	665	891	705	791	115	27	43	266	277	280	3.48	3.53667	0.256667	1.21667	0.081	-3.624	4.39413e-21	2.18369e-19	down	0.376	-1.413	3.04493e-18	7.62984e-17	down	0.074	-3.762	3.82071e-24	1.81421e-22	down	0.34	-1.555	4.21007e-27	9.89791e-26	down
g38759	LG10	4022614	4027931	-	Serine carboxypeptidase	19	26	22	14	8	65	3	1	4	2	0	0	0.333333	0.443333	0.04	0.01	0.13	-2.946	0.000923483	0.00354616	down	0.032	-4.963	8.83989e-05	0.000384152	down	0.091	-3.455	0.00154458	0.00549047	down	0.022	-5.481	8.59286e-05	0.00029355	down
g38959	LG10	5536741	5540093	+	KR domain	2148	2071	2119	1455	1539	1807	665	669	443	550	477	573	23.69	18.3133	6.60333	6.03667	0.305	-1.715	2.21704e-21	1.13273e-19	down	0.274	-1.868	6.53399e-67	1.78094e-64	down	0.363	-1.46	2.2963e-15	4.92179e-14	down	0.326	-1.615	8.03199e-41	3.68128e-39	down
g39015	LG10	5957080	5964801	+	MatE	4399	5784	4089	4753	4142	3937	1213	964	832	1057	1044	431	46.4867	42.8033	9.75333	8.49	0.229	-2.128	8.6854e-37	1.28689e-34	down	0.197	-2.346	2.24974e-07	1.59062e-06	down	0.23	-2.123	1.87777e-61	5.14056e-59	down	0.197	-2.342	9.28088e-08	4.83299e-07	down
g39241	LG10	7632199	7633401	-	Tektin family	972	1371	1033	557	499	532	109	84	54	39	18	8	20.6467	9.92333	1.49	0.4	0.079	-3.664	5.21392e-49	1.5225e-46	down	0.021	-5.584	4.7141e-22	1.61989e-20	down	0.152	-2.721	1.12252e-31	8.32865e-30	down	0.04	-4.641	3.09028e-48	1.84499e-46	down
g39417	LG10	9092417	9096603	+	Restriction alleviation protein Lar	1746	1965	1886	1624	1315	1406	650	247	682	421	313	389	30.0467	23.73	8.41667	6.06667	0.305	-1.715	5.6503e-08	5.38576e-07	down	0.217	-2.205	8.07635e-65	2.04807e-62	down	0.356	-1.49	1.08785e-06	7.7042e-06	down	0.253	-1.982	3.62006e-62	3.44598e-60	down
g3965	LG1	28605918	28610541	+	Endonuclease-reverse transcriptase	123	149	109	61	76	91	29	29	24	0	0	0	0.71	0.44	0.153333	0	0.235	-2.087	1.02595e-09	1.29311e-08	down	0.002	-9.304	2.94879e-14	5.03404e-13	down	0.354	-1.5	0.000210029	0.00092655	down	0.002	-8.718	4.58295e-12	3.76264e-11	down
g40545	LG10	17334824	17338108	+	zinc-binding in reverse transcriptase	345	397	380	294	244	221	38	111	44	129	74	123	4.10333	2.82667	0.716667	1.19333	0.192	-2.383	1.70845e-08	1.78514e-07	down	0.312	-1.68	7.04154e-15	1.28242e-13	down	0.257	-1.962	7.33991e-06	4.44957e-05	down	0.418	-1.26	9.15336e-08	4.77267e-07	down
g41101	LG10	21874646	21884952	+	SDA1	2152	2007	1882	2429	1823	2069	999	602	799	533	385	530	10.95	11.6767	4.32	2.64667	0.43	-1.217	1.5672e-13	3.33133e-12	down	0.26	-1.946	3.45998e-65	9.00202e-63	down	0.372	-1.427	2.58546e-17	6.75178e-16	down	0.224	-2.158	1.23478e-69	1.51425e-67	down
g41266	LG10	23106237	23109917	-	NAD(P)H-binding	95	106	114	95	80	138	28	18	24	18	8	12	1.61333	1.62667	0.356667	0.196667	0.24	-2.058	4.61214e-08	4.46563e-07	down	0.13	-2.948	5.33493e-13	7.89928e-12	down	0.22	-2.186	8.54559e-08	7.23586e-07	down	0.118	-3.079	2.49842e-12	2.10237e-11	down
g41630	LG11	1908637	1910267	+	Ribosomal protein S6	2238	2382	2101	2315	1926	2112	891	578	746	920	700	623	44.0967	42.53	14.4467	14.9167	0.357	-1.485	5.51489e-22	2.94557e-20	down	0.363	-1.46	4.18298e-22	1.44857e-20	down	0.342	-1.548	3.16337e-26	1.7038e-24	down	0.347	-1.526	5.00457e-28	1.24465e-26	down
g41657	LG11	2018273	2020908	-	4Fe-4S binding domain	435	537	384	606	574	541	74	63	71	53	22	25	7.32333	9.53333	1.12667	0.543333	0.168	-2.575	3.40682e-29	3.08348e-27	down	0.08	-3.649	1.94341e-36	1.66027e-34	down	0.119	-3.071	3.30535e-56	8.00035e-54	down	0.057	-4.144	2.15769e-60	1.95808e-58	down
g41950	LG11	3613787	3615174	+	LIM domain	561	550	476	529	495	621	283	191	199	210	151	122	12.0767	12.8033	5.08	3.73	0.46	-1.122	2.43333e-10	3.34406e-09	down	0.332	-1.591	3.32925e-14	5.65225e-13	down	0.4	-1.322	9.60018e-13	1.56308e-11	down	0.289	-1.793	8.29881e-18	1.09676e-16	down
g41954	LG11	3632797	3635332	+	Reverse transcriptase-like	42	38	43	21	30	25	0	0	0	0	0	0	0.593333	0.376667	0	0	0.005	-7.676	1.04099e-08	1.12432e-07	down	0.005	-7.68	3.79187e-09	3.50713e-08	down	0.007	-7.132	7.85429e-07	5.69454e-06	down	0.007	-7.137	3.23532e-07	1.57305e-06	down
g42594	LG11	8279234	8280799	+	UDP-glucoronosyl and UDP-glucosyl transferase	1173	1629	1422	1511	1263	1475	554	190	424	195	152	128	22.3067	22.8267	6.06	2.54	0.295	-1.761	2.0911e-08	2.15106e-07	down	0.122	-3.034	2.10383e-52	3.44057e-50	down	0.267	-1.908	3.58214e-11	4.83485e-10	down	0.11	-3.184	2.64552e-92	6.00196e-90	down
g42595	LG11	8281374	8283293	+	UDP-glucoronosyl and UDP-glucosyl transferase	1272	1673	1713	816	568	828	238	177	439	537	261	297	19.7367	9.48	3.65	4.63	0.202	-2.31	6.0183e-12	1.04362e-10	down	0.251	-1.992	4.53079e-17	1.02853e-15	down	0.387	-1.368	4.12433e-05	0.000212656	down	0.483	-1.051	3.54763e-06	1.49974e-05	down
g42642	LG11	8595153	8598858	-	RmlD substrate binding domain	370	482	523	299	240	285	57	35	64	103	102	129	5.85667	3.55333	0.656667	1.43	0.123	-3.026	2.89142e-23	1.75805e-21	down	0.262	-1.931	1.14213e-17	2.73367e-16	down	0.187	-2.42	3.54728e-17	9.13754e-16	down	0.398	-1.328	1.17548e-10	8.44827e-10	down
g42980	LG11	10962143	10969211	+	GAG-pre-integrase domain	24	24	18	19	16	13	0	0	0	0	0	1	0.17	0.126667	0	0.00333333	0.009	-6.768	4.05054e-06	2.73442e-05	down	0.018	-5.81	2.75678e-05	0.000132045	down	0.011	-6.461	4.08547e-05	0.000210833	down	0.022	-5.505	0.000199646	0.000641965	down
g43118	LG11	11920871	11921472	-	PetM family of cytochrome b6f complex subunit 7	240	305	202	160	138	180	41	45	39	25	5	2	9.09667	5.96333	1.53333	0.386667	0.184	-2.444	4.3016e-17	1.38656e-15	down	0.046	-4.449	5.21527e-07	3.46574e-06	down	0.259	-1.95	7.34802e-11	9.52891e-10	down	0.065	-3.949	2.72189e-13	2.49223e-12	down
g43149	LG11	12164963	12179037	+	Phosphoinositide 3-kinase family, accessory domain (PIK domain)	99	106	71	79	61	104	38	41	40	37	15	28	0.316667	0.286667	0.14	0.09	0.475	-1.073	0.00233084	0.00794592	down	0.313	-1.677	1.34332e-05	6.88006e-05	down	0.484	-1.046	0.00667413	0.0197062	down	0.318	-1.653	8.59293e-05	0.00029355	down
g43179	LG11	12336342	12344655	-	Zinc knuckle	225	173	109	122	140	132	0	4	0	0	0	0	0.64	0.513333	0.00666667	0	0.009	-6.831	3.86036e-16	1.12152e-14	down	0.001	-9.703	2.90642e-15	5.44674e-14	down	0.01	-6.638	7.64288e-16	1.72182e-14	down	0.001	-9.508	7.97718e-15	8.32943e-14	down
g43271	LG11	12967744	12971495	-	TIP41-like family	244	195	226	199	138	185	132	41	48	73	76	67	4.06	3.23667	1.29667	1.34	0.349	-1.519	0.000167667	0.000785147	down	0.355	-1.496	4.69019e-10	4.86718e-09	down	0.404	-1.308	0.00180795	0.00630307	down	0.41	-1.288	1.04044e-06	4.74201e-06	down
g43318	LG11	13314910	13317148	+	--	145	104	103	105	88	94	24	6	53	0	0	0	1.49	1.24333	0.36	0	0.262	-1.935	0.00229573	0.00784827	down	0.002	-9.188	7.83421e-14	1.27911e-12	down	0.289	-1.792	0.00556002	0.0168182	down	0.002	-9.046	2.76684e-13	2.53e-12	down
g43363	LG11	13631959	13632827	+	--	5965	6373	5343	3654	3241	4025	995	1260	956	362	217	366	193.173	121.92	35.3233	10.3633	0.2	-2.322	7.41638e-40	1.27336e-37	down	0.058	-4.117	2.6054e-184	6.5245e-181	down	0.292	-1.775	1.40453e-25	7.26897e-24	down	0.084	-3.571	1.2097e-152	7.2649e-150	down
g43390	LG11	13788546	13794710	+	Malectin domain	499	619	502	1128	1068	1101	101	164	55	127	199	164	3.34	6.95333	0.663333	1.03667	0.217	-2.206	1.04285e-09	1.31358e-08	down	0.334	-1.584	7.81785e-12	1.01899e-10	down	0.096	-3.379	5.14867e-26	2.72502e-24	down	0.148	-2.759	2.88427e-49	1.7955e-47	down
g43444	LG11	14161371	14165361	-	F-box-like	313	183	304	480	376	563	47	50	36	47	54	78	4.06333	7.29667	0.67	0.913333	0.181	-2.468	1.80486e-13	3.81827e-12	down	0.242	-2.046	2.93143e-11	3.53776e-10	down	0.093	-3.433	2.05461e-40	2.50947e-38	down	0.124	-3.011	8.67888e-37	3.25454e-35	down
g43521	LG11	14714947	14720135	+	ATPase domain predominantly from Archaea	251	267	220	313	304	424	103	76	107	102	84	80	1.83333	2.64333	0.713333	0.67	0.424	-1.239	3.89623e-07	3.2052e-06	down	0.393	-1.347	3.21334e-10	3.40459e-09	down	0.271	-1.884	1.00576e-13	1.82217e-12	down	0.251	-1.994	6.90174e-19	9.86857e-18	down
g43522	LG11	14727307	14730284	+	AAA domain	191	223	208	266	227	382	63	133	39	46	30	32	1.67333	2.39333	0.633333	0.293333	0.417	-1.263	0.00464317	0.0144571	down	0.188	-2.412	1.66972e-18	4.25847e-17	down	0.269	-1.897	1.7616e-05	9.85855e-05	down	0.121	-3.047	8.29756e-26	1.81883e-24	down
g43612	LG11	15416899	15418523	+	--	316	381	275	544	367	390	132	175	115	73	88	50	4.38667	6	1.91667	0.98	0.478	-1.064	5.63519e-05	0.000295895	down	0.24	-2.059	6.73918e-14	1.10845e-12	down	0.323	-1.631	3.72895e-10	4.40144e-09	down	0.162	-2.627	1.71811e-23	3.27556e-22	down
g43673	LG11	15851576	15855052	-	CBS domain	756	690	889	817	738	827	183	85	166	98	98	72	13.2467	13.7	2.42667	1.54	0.2	-2.324	1.74639e-16	5.26483e-15	down	0.125	-3.001	1.49086e-42	1.75174e-40	down	0.178	-2.489	1.77451e-23	7.88794e-22	down	0.111	-3.17	7.46718e-70	9.24052e-68	down
g43740	LG11	16396543	16406435	+	RNA recognition motif. (a.k.a. RRM, RBD, or RNP domain)	77	85	100	62	97	70	25	21	16	21	33	36	0.75	0.666667	0.176667	0.26	0.255	-1.971	1.51983e-06	1.11972e-05	down	0.374	-1.419	0.000190592	0.000769416	down	0.263	-1.924	1.53155e-05	8.68625e-05	down	0.386	-1.373	0.000985405	0.002786	down
g44087	LG11	19071863	19079801	-	Retroviral aspartyl protease	93	85	86	43	31	37	3	1	0	2	1	6	0.463333	0.196667	0.00666667	0.0166667	0.016	-5.937	2.10086e-12	3.91453e-11	down	0.037	-4.765	1.01895e-14	1.82504e-13	down	0.035	-4.841	7.51195e-07	5.46831e-06	down	0.079	-3.667	1.56989e-06	6.96312e-06	down
g44088	LG11	19079932	19082491	-	Pentacotripeptide-repeat region of PRORP	242	214	266	188	123	167	69	49	45	59	25	53	3.96	2.65333	0.876667	0.746667	0.243	-2.04	1.66075e-13	3.5227e-12	down	0.203	-2.304	9.10445e-15	1.63729e-13	down	0.335	-1.58	1.9289e-07	1.54776e-06	down	0.278	-1.846	1.81821e-08	1.0304e-07	down
g44090	LG11	19104206	19106010	+	--	25	38	24	8	11	19	0	1	0	0	0	0	0.406667	0.183333	0.00333333	0	0.014	-6.208	8.50627e-06	5.36571e-05	down	0.007	-7.174	1.38014e-07	1.00597e-06	down	0.028	-5.165	0.00146305	0.00523439	down	0.014	-6.132	0.000136712	0.000451581	down
g44091	LG11	19107377	19109381	-	--	254	230	213	128	131	111	3	0	0	0	0	0	4.28667	2.33	0.0166667	0	0.005	-7.744	1.96206e-18	7.35636e-17	down	0.001	-10.177	2.68928e-17	6.22394e-16	down	0.008	-6.988	3.91186e-14	7.3838e-13	down	0.001	-9.416	1.6524e-14	1.67525e-13	down
g44092	LG11	19110453	19117911	-	--	811	681	642	410	398	329	21	14	17	34	27	40	6.65667	3.63333	0.163333	0.32	0.027	-5.235	1.95792e-82	1.63181e-79	down	0.051	-4.281	4.91585e-91	2.7356e-88	down	0.045	-4.479	5.71069e-50	1.06927e-47	down	0.087	-3.526	1.49203e-47	8.74176e-46	down
g44094	LG11	19125489	19127751	-	--	104	93	78	51	44	71	4	0	2	19	11	15	1.73333	1.06667	0.0366667	0.286667	0.024	-5.406	1.88786e-13	3.98122e-12	down	0.178	-2.493	1.29622e-10	1.44386e-09	down	0.035	-4.834	5.0289e-09	5.11718e-08	down	0.265	-1.918	6.08428e-05	0.000212908	down
g44270	LG11	20742869	20747021	+	SWIM zinc finger	43	38	48	73	83	34	9	1	7	0	2	4	0.453333	0.683333	0.06	0.02	0.14	-2.831	7.79612e-05	0.000396597	down	0.05	-4.311	8.88013e-08	6.67167e-07	down	0.086	-3.536	1.12214e-06	7.92304e-06	down	0.031	-5.018	5.37765e-10	3.59893e-09	down
g44284	LG11	20884498	20890484	-	PsbP	163	195	152	142	181	175	68	53	93	43	77	81	1.99	1.99667	0.843333	0.806667	0.461	-1.116	0.000548734	0.00224643	down	0.433	-1.206	0.000112926	0.000478694	down	0.425	-1.236	0.000196078	0.000871591	down	0.399	-1.326	3.27655e-05	0.000119896	down
g44369	LG11	21617523	21620533	+	zinc-binding in reverse transcriptase	31	20	15	18	30	21	0	2	2	1	4	0	0.17	0.186667	0.0133333	0.0133333	0.069	-3.868	0.000429666	0.00181393	down	0.086	-3.538	0.000547276	0.00199633	down	0.058	-4.108	0.000157929	0.000717767	down	0.073	-3.776	0.000225641	0.000718423	down
g44643	LG11	23493960	23499075	-	--	134	115	110	109	90	182	35	82	26	31	14	31	1.25	1.35333	0.503333	0.263333	0.443	-1.176	0.014738	0.0387075	down	0.228	-2.134	8.16006e-10	8.20655e-09	down	0.377	-1.408	0.00659069	0.0195004	down	0.194	-2.369	5.00539e-09	3.01616e-08	down
g4466	LG2	1888816	1890550	+	non-haem dioxygenase in morphine synthesis N-terminal	523	657	602	366	343	340	193	130	180	162	123	131	11.8833	7.12667	3.33667	2.79667	0.306	-1.708	4.43123e-15	1.14148e-13	down	0.253	-1.984	9.9539e-27	4.91767e-25	down	0.471	-1.086	1.41756e-07	1.16212e-06	down	0.389	-1.364	7.81935e-14	7.50808e-13	down
g4477	LG2	1937475	1940901	-	RNA-binding protein Tab2/Atab2	1257	1326	1443	2014	1886	2029	627	664	549	457	548	617	19.5467	29.2667	8.90333	7.97333	0.498	-1.006	7.46053e-09	8.25731e-08	down	0.438	-1.19	1.41788e-12	2.00107e-11	down	0.307	-1.706	3.50041e-38	3.68565e-36	down	0.27	-1.891	2.88199e-46	1.63916e-44	down
g44780	LG11	24572039	24581217	-	Domain of unknown function (DUF4049)	364	324	245	422	306	420	115	126	138	114	142	157	4.84	6.09667	1.99333	2.19667	0.45	-1.153	2.84168e-06	1.98535e-05	down	0.487	-1.039	3.11744e-06	1.80501e-05	down	0.329	-1.604	7.52178e-12	1.10666e-10	down	0.356	-1.491	2.67618e-12	2.24547e-11	down
g45211	LG11	27859340	27865188	-	Leucine Rich repeat	64	84	61	130	163	179	32	4	9	0	0	0	1.16	2.69	0.236667	0	0.224	-2.16	0.00107143	0.00404288	down	0.003	-8.439	1.96375e-11	2.42172e-10	down	0.09	-3.481	8.86381e-10	9.95329e-09	down	0.001	-9.769	1.23949e-15	1.38374e-14	down
g45927	LG11	33677997	33680769	+	Methylmalonyl Co-A mutase-associated GTPase MeaB	2204	2509	2291	2109	1636	2036	1014	816	812	767	744	736	40.41	33.94	15.16	13.1567	0.409	-1.288	5.06026e-23	3.0035e-21	down	0.35	-1.516	5.46787e-35	4.32966e-33	down	0.45	-1.153	2.13895e-20	7.38311e-19	down	0.384	-1.382	5.71366e-32	1.71944e-30	down
g46127	LG11	35264819	35270856	-	Cathepsin propeptide inhibitor domain (I29)	115	266	95	396	176	106	8	7	5	1	0	4	2.68667	3.92	0.11	0.03	0.046	-4.442	6.6005e-15	1.67122e-13	down	0.011	-6.455	4.53088e-16	9.22922e-15	down	0.029	-5.098	1.55455e-18	4.53401e-17	down	0.007	-7.113	1.57889e-19	2.35404e-18	down
g4635	LG2	3106742	3111161	-	Leucine rich repeat N-terminal domain	163	166	176	226	159	193	37	62	34	40	72	70	1.13667	1.31667	0.3	0.42	0.289	-1.789	5.77723e-07	4.61314e-06	down	0.395	-1.339	1.66514e-05	8.37734e-05	down	0.23	-2.122	1.4495e-09	1.58376e-08	down	0.313	-1.674	4.85352e-08	2.61241e-07	down
g4638	LG2	3139216	3140621	-	Protein of unknown function (DUF1635)	4136	3434	2558	3011	3031	3481	1667	1234	1207	1351	1408	1850	60.0533	58.13	24.3467	27.8833	0.443	-1.175	4.21765e-12	7.49566e-11	down	0.499	-1.003	8.18209e-10	8.22458e-09	down	0.422	-1.245	8.93365e-24	4.0704e-22	down	0.475	-1.075	3.14902e-18	4.29222e-17	down
g46477	LG11	37735274	37736446	-	HSP20-like domain found in ArsA	60	85	32	73	50	60	12	2	8	8	7	4	1.55667	1.66333	0.193333	0.173333	0.134	-2.896	2.56092e-05	0.000145112	down	0.119	-3.075	2.71391e-07	1.89176e-06	down	0.117	-3.1	5.62358e-07	4.18187e-06	down	0.103	-3.284	2.33518e-09	1.46059e-08	down
g46591	LG11	38440508	38442299	-	2Fe-2S iron-sulfur cluster binding domain	1207	1442	1367	4036	3938	4175	325	303	281	204	180	59	25.5667	78.8233	5.76333	2.88333	0.246	-2.022	2.31648e-34	2.89596e-32	down	0.122	-3.041	1.70888e-08	1.43482e-07	down	0.074	-3.763	3.7781e-252	2.1425e-248	down	0.036	-4.782	1.53901e-19	2.29878e-18	down
g46675	LG11	39003046	39004741	-	Trypsin and protease inhibitor	428	534	545	2478	1978	4078	64	144	105	107	100	81	9.52333	54.6167	2.00667	1.84667	0.231	-2.116	1.06124e-09	1.33465e-08	down	0.208	-2.267	1.3309e-24	5.69104e-23	down	0.037	-4.753	2.7624e-46	4.21743e-44	down	0.033	-4.903	1.04987e-46	6.03002e-45	down
g46706	LG11	39184693	39189689	+	GDP dissociation inhibitor	399	562	408	495	357	440	184	91	162	158	125	119	5.73667	5.52333	1.82	1.71	0.345	-1.534	5.97225e-08	5.66833e-07	down	0.32	-1.645	9.38362e-15	1.68522e-13	down	0.332	-1.593	1.94466e-09	2.09083e-08	down	0.306	-1.707	1.89242e-18	2.62413e-17	down
g46744	LG11	39426915	39430548	-	Ankyrin repeat	861	807	765	1643	1201	1120	212	279	142	249	234	339	8.78	14.5767	2.28667	2.99667	0.285	-1.811	1.41741e-12	2.71699e-11	down	0.367	-1.448	1.2561e-20	3.87736e-19	down	0.158	-2.66	4.36291e-25	2.21465e-23	down	0.203	-2.298	7.31509e-42	3.51857e-40	down
g46881	LG11	40203924	40204820	-	Trypsin and protease inhibitor	807	644	787	1303	833	1973	167	126	82	122	84	43	18.4433	34.25	3.03333	2.07667	0.18	-2.474	1.11026e-23	7.05014e-22	down	0.121	-3.045	9.94754e-25	4.30419e-23	down	0.089	-3.486	1.31238e-29	8.69697e-28	down	0.06	-4.057	2.68889e-14	2.68016e-13	down
g47170	LG12	1968252	1971277	-	--	348	356	305	397	365	435	179	69	138	161	115	123	8.14333	9.88	3.07667	3.25667	0.411	-1.281	3.46564e-05	0.000190784	down	0.43	-1.219	1.09837e-10	1.23341e-09	down	0.313	-1.675	2.48357e-08	2.27365e-07	down	0.327	-1.615	5.38273e-18	7.19289e-17	down
g47217	LG12	2311290	2315916	+	--	1202	753	897	781	767	845	429	279	374	391	264	386	11.23	9.63667	4.24	4.12667	0.413	-1.277	8.79927e-09	9.60477e-08	down	0.395	-1.341	1.81037e-12	2.53092e-11	down	0.443	-1.174	5.30918e-12	7.96477e-11	down	0.424	-1.239	1.22655e-18	1.71949e-17	down
g47328	LG12	3128417	3131530	-	Sulfotransferase domain	78	75	53	43	42	47	4	0	0	0	2	0	0.91	0.6	0.0166667	0.01	0.021	-5.591	1.01149e-09	1.2785e-08	down	0.011	-6.545	3.51909e-09	3.2669e-08	down	0.029	-5.115	2.94252e-07	2.28668e-06	down	0.015	-6.053	1.67018e-07	8.42767e-07	down
g47499	LG12	4294582	4296923	+	F-box-like	83	80	51	603	519	514	2	0	4	0	0	0	0.783333	6.15667	0.0233333	0	0.031	-5.018	1.71264e-10	2.42099e-09	down	0.003	-8.464	1.86985e-11	2.31304e-10	down	0.004	-8.113	1.02462e-38	1.11737e-36	down	0	-11.557	2.88792e-22	5.10316e-21	down
g47821	LG12	6870703	6873693	-	--	132	134	115	36	57	50	5	6	2	23	25	8	1.84667	0.716667	0.0633333	0.276667	0.037	-4.749	4.88242e-19	1.97095e-17	down	0.162	-2.622	3.04283e-10	3.23473e-09	down	0.089	-3.494	3.54573e-07	2.71452e-06	down	0.389	-1.362	0.0142211	0.0309155	down
g47948	LG12	7919828	7923923	-	Transposase, Mutator family	48	28	37	17	6	12	1	0	0	3	0	0	0.293333	0.09	0.00333333	0.00666667	0.01	-6.586	1.17943e-06	8.87036e-06	down	0.029	-5.128	8.81623e-07	5.61769e-06	down	0.031	-5.029	0.00244207	0.00822693	down	0.083	-3.591	0.0108987	0.0243808	down
g48093	LG12	9096406	9101850	+	Domain of unknown function (DUF4413)	106	119	115	45	39	26	0	0	0	0	0	0	1.60667	0.53	0	0	0.002	-9.143	1.93097e-13	4.06999e-12	down	0.002	-9.147	9.13885e-14	1.48126e-12	down	0.005	-7.659	2.74587e-08	2.49994e-07	down	0.005	-7.664	1.08386e-08	6.29161e-08	down
g4824	LG2	4260375	4261182	+	HSP20-like domain found in ArsA	2594	568	659	1422	675	708	36	63	37	11	81	18	34.2233	25.89	1.25333	1.07333	0.04	-4.63	3.75858e-10	5.01709e-09	down	0.034	-4.869	6.41144e-06	3.50555e-05	down	0.049	-4.359	9.19561e-36	8.54848e-34	down	0.041	-4.592	8.94503e-07	4.11407e-06	down
g48364	LG12	11125290	11125929	-	--	73	47	49	79	76	79	16	22	29	3	3	23	1.94	2.75333	0.786667	0.326667	0.442	-1.179	0.0168436	0.0432606	down	0.183	-2.451	0.000530998	0.00194173	down	0.286	-1.805	3.74928e-05	0.000195107	down	0.119	-3.073	1.21052e-06	5.46049e-06	down
g48429	LG12	11559216	11561913	-	Protein kinase domain	1330	1212	1124	1394	1239	1469	531	209	430	632	367	361	14.19	16.2267	4.48	5.31	0.344	-1.541	1.8952e-08	1.96571e-07	down	0.402	-1.315	1.61043e-11	2.01076e-10	down	0.277	-1.85	2.44117e-12	3.79562e-11	down	0.324	-1.626	1.54214e-19	2.3026e-18	down
g4849	LG2	4431430	4432216	+	HSP20-like domain found in ArsA	2940	625	597	887	330	355	1	1	0	16	168	13	38.1433	14.85	0.02	2.00333	0.001	-10.865	3.54014e-21	1.78817e-19	down	0.058	-4.119	0.00166111	0.00537173	down	0.001	-9.629	1.76095e-18	5.10972e-17	down	0.135	-2.884	0.0172827	0.036807	down
g4879	LG2	4632958	4633740	+	HSP20-like domain found in ArsA	1128	183	291	41	19	26	0	0	0	0	6	0	14.82	0.816667	0	0.0633333	0	-11.342	1.15508e-11	1.92698e-10	down	0.005	-7.779	1.71326e-05	8.59462e-05	down	0.006	-7.292	4.01203e-07	3.0445e-06	down	0.073	-3.774	0.000329955	0.00101909	down
g4887	LG2	4683247	4686514	+	Glyoxalase/Bleomycin resistance protein/Dioxygenase superfamily	206	185	181	165	137	148	5	16	3	70	41	51	5.35667	4.3	0.23	1.52667	0.046	-4.431	4.53232e-18	1.632e-16	down	0.306	-1.707	3.77573e-11	4.47316e-10	down	0.053	-4.231	3.41038e-15	7.1817e-14	down	0.351	-1.508	9.1226e-08	4.75724e-07	down
g4897	LG2	4752460	4753212	-	HSP20-like domain found in ArsA	2503	514	302	2065	840	887	0	0	0	12	122	5	31.6	37.4833	0	1.48	0	-12.378	7.48313e-12	1.28097e-10	down	0.051	-4.281	0.00319107	0.00957368	down	0	-12.751	2.7572e-25	1.40859e-23	down	0.04	-4.654	0.000296033	0.00092234	down
g48971	LG12	15540844	15543909	+	GTP cyclohydrolase I	108	209	101	116	97	116	15	26	33	39	41	31	1.92	1.55333	0.35	0.523333	0.198	-2.335	1.37366e-06	1.02106e-05	down	0.292	-1.774	2.70709e-06	1.58297e-05	down	0.226	-2.144	6.19173e-07	4.56842e-06	down	0.334	-1.583	1.2547e-06	5.64486e-06	down
g49006	LG12	15816563	15820759	+	Endonuclease/Exonuclease/phosphatase family	33	10	17	30	29	32	0	0	0	0	0	0	0.15	0.24	0	0	0.01	-6.624	2.40634e-05	0.000137072	down	0.01	-6.629	7.87725e-06	4.2383e-05	down	0.006	-7.385	1.17239e-07	9.71362e-07	down	0.006	-7.39	5.18081e-08	2.78161e-07	down
g49009	LG12	15835121	15836898	-	Photosystem I reaction centre subunit XI	90	87	60	60	56	41	24	9	17	22	12	18	1.84667	1.25667	0.386667	0.406667	0.228	-2.131	5.64055e-06	3.68649e-05	down	0.238	-2.069	2.85524e-07	1.98131e-06	down	0.309	-1.695	0.00131605	0.0047765	down	0.322	-1.635	0.000502034	0.00150349	down
g49502	LG12	19497191	19505253	+	No apical meristem (NAM) protein	90	65	59	78	69	108	9	15	18	14	25	27	1.29333	1.57667	0.26	0.41	0.219	-2.191	1.21024e-05	7.37707e-05	down	0.34	-1.557	0.000249924	0.000982508	down	0.165	-2.598	1.15432e-07	9.57395e-07	down	0.256	-1.963	3.69105e-06	1.55746e-05	down
g4953	LG2	5080197	5080813	-	--	13903	18072	11889	14901	12969	15418	2781	2241	2224	3039	4296	4383	521.057	527.133	86.1133	142.823	0.18	-2.472	1.46052e-54	5.41001e-52	down	0.295	-1.763	3.9276e-21	1.26197e-19	down	0.165	-2.604	6.0213e-170	1.4939e-166	down	0.269	-1.896	5.72333e-39	2.40952e-37	down
g49566	LG12	20026669	20032566	-	No apical meristem (NAM) protein	491	365	554	247	232	365	58	56	59	66	46	92	9.14333	5.53667	1.11333	1.31333	0.133	-2.907	4.36405e-26	3.26325e-24	down	0.155	-2.692	7.86243e-24	3.12834e-22	down	0.203	-2.302	9.1194e-16	2.04056e-14	down	0.235	-2.089	7.67702e-14	7.37836e-13	down
g49769	LG12	21423503	21427597	+	GAG-pre-integrase domain	380	417	206	884	830	875	88	40	141	78	69	142	1.78	4.75667	0.486667	0.523333	0.298	-1.747	7.42296e-05	0.000379448	down	0.314	-1.672	8.08054e-08	6.11335e-07	down	0.103	-3.279	3.71241e-20	1.2531e-18	down	0.109	-3.202	5.88628e-54	4.30015e-52	down
g49871	LG12	22135140	22135826	+	CP12 domain	43	66	62	34	28	20	4	1	0	4	3	2	1.84	0.896667	0.05	0.0966667	0.031	-5.014	1.09959e-08	1.1841e-07	down	0.057	-4.134	5.84141e-10	5.99662e-09	down	0.058	-4.104	6.84206e-05	0.000336324	down	0.108	-3.212	5.48608e-05	0.000193551	down
g50219	LG12	25020353	25021405	-	Plant invertase/pectin methylesterase inhibitor	206	168	206	279	131	192	38	41	41	72	52	62	4.07333	4.26333	0.843333	1.31333	0.226	-2.145	9.14972e-13	1.79605e-11	down	0.347	-1.528	1.15515e-09	1.14083e-08	down	0.199	-2.329	7.46215e-11	9.66743e-10	down	0.304	-1.716	2.05243e-08	1.15591e-07	down
g50338	LG12	25989281	25998619	-	Integrase core domain	35	41	60	34	41	45	9	12	9	12	10	8	0.29	0.26	0.0633333	0.0633333	0.239	-2.064	0.000423544	0.00179073	down	0.238	-2.073	0.000137402	0.000571385	down	0.247	-2.016	0.000392251	0.00162208	down	0.245	-2.027	0.000232573	0.000739141	down
g50420	LG12	26533250	26535060	-	--	7	6	6	22	36	51	0	0	0	0	0	0	0.186667	1.09333	0	0	0.032	-4.976	0.0130824	0.0350357	down	0.032	-4.981	0.00699723	0.0190551	down	0.005	-7.651	5.10122e-08	4.46708e-07	down	0.005	-7.655	1.73049e-08	9.8355e-08	down
g50796	LG12	29227145	29227747	+	--	382	162	191	197	118	105	28	57	24	78	53	30	8.91333	5.21	1.34667	1.99667	0.166	-2.592	2.24421e-08	2.29498e-07	down	0.241	-2.051	2.76003e-07	1.92123e-06	down	0.26	-1.941	2.77777e-05	0.000149305	down	0.379	-1.399	0.000346784	0.00106719	down
g51189	LG13	188546	189107	-	--	50	44	84	63	99	147	4	7	13	21	23	9	2.75333	4.82	0.376667	0.83	0.148	-2.754	2.88511e-05	0.000161493	down	0.324	-1.625	0.00241975	0.00749013	down	0.078	-3.684	8.00145e-10	9.03092e-09	down	0.17	-2.554	1.51306e-07	7.67945e-07	down
g51191	LG13	194017	194937	-	--	450	641	579	657	511	485	181	220	127	177	172	171	13.4033	13.4733	4.22	4.22333	0.344	-1.539	1.74994e-08	1.82539e-07	down	0.338	-1.563	7.89846e-15	1.43198e-13	down	0.316	-1.662	1.81369e-11	2.55028e-10	down	0.31	-1.689	6.7278e-22	1.16466e-20	down
g51405	LG13	1835415	1835956	-	--	110	85	101	66	69	89	12	8	21	12	12	16	4.72	3.64333	0.663333	0.64	0.152	-2.717	1.5919e-08	1.67413e-07	down	0.147	-2.769	2.06322e-12	2.86938e-11	down	0.182	-2.46	1.97269e-06	1.33038e-05	down	0.175	-2.515	9.87808e-09	5.76273e-08	down
g51406	LG13	1840790	1841716	-	--	264	417	296	715	537	716	163	78	186	145	121	95	7.75333	15.92	3.39	2.91667	0.475	-1.073	0.00219479	0.00754364	down	0.403	-1.31	4.10781e-07	2.77692e-06	down	0.214	-2.225	7.61336e-14	1.39848e-12	down	0.181	-2.465	1.39278e-35	4.93725e-34	down
g51792	LG13	4512579	4516517	-	FGGY family of carbohydrate kinases, C-terminal domain	7753	1664	424	1384	511	473	51	61	56	18	79	8	25.87	6.49	0.463333	0.303333	0.02	-5.676	3.87656e-08	3.80382e-07	down	0.013	-6.274	2.69155e-06	1.5748e-05	down	0.071	-3.811	2.82355e-22	1.14837e-20	down	0.047	-4.407	2.39085e-05	8.94096e-05	down
g51810	LG13	4663989	4666740	+	--	606	507	761	2209	2137	2525	53	44	41	110	83	66	15.96	59.2067	1.15667	2.21667	0.079	-3.655	6.8171e-41	1.24529e-38	down	0.149	-2.743	3.44566e-27	1.74756e-25	down	0.02	-5.663	1.1848e-216	5.2257e-213	down	0.037	-4.756	2.2305e-194	2.1688e-191	down
g51818	LG13	4719627	4722368	+	--	900	909	798	348	281	385	102	49	79	128	98	86	19.08	7.57333	1.66667	2.31667	0.095	-3.39	6.07046e-50	1.85381e-47	down	0.13	-2.939	6.2618e-64	1.54871e-61	down	0.222	-2.174	4.77326e-15	9.93053e-14	down	0.303	-1.723	9.44634e-15	9.80082e-14	down
g51926	LG13	5552341	5560753	+	zinc-binding in reverse transcriptase	278	240	218	195	194	211	96	37	76	104	89	84	2.30667	1.92667	0.646667	0.883333	0.306	-1.707	2.68304e-07	2.27453e-06	down	0.411	-1.283	2.01171e-09	1.91958e-08	down	0.338	-1.563	4.26252e-06	2.70116e-05	down	0.454	-1.14	5.61898e-07	2.6509e-06	down
g52228	LG13	7827051	7828905	-	Zinc ribbon domain	116	108	118	195	133	178	20	6	10	41	42	35	3.09333	4.64667	0.316667	1.08667	0.112	-3.155	7.97454e-12	1.35927e-10	down	0.376	-1.41	3.55943e-06	2.04144e-05	down	0.069	-3.855	4.00171e-19	1.22852e-17	down	0.231	-2.115	8.33952e-13	7.31131e-12	down
g52268	LG13	8075569	8076765	+	--	525	643	729	886	650	946	42	29	28	138	142	72	25.4567	33.6367	1.30333	4.80333	0.056	-4.156	1.63089e-50	5.17806e-48	down	0.203	-2.3	6.31197e-16	1.26388e-14	down	0.039	-4.673	8.36035e-82	4.04712e-79	down	0.141	-2.821	4.62646e-30	1.2714e-28	down
g52437	LG13	9331063	9331792	+	--	96	88	37	28	35	27	5	0	10	0	0	0	2.43667	1.03667	0.17	0	0.076	-3.726	3.43623e-06	2.35266e-05	down	0.003	-8.5	3.90856e-11	4.62232e-10	down	0.164	-2.606	0.00585475	0.0176091	down	0.006	-7.38	6.23577e-08	3.31489e-07	down
g52508	LG13	9712964	9715418	-	Isoprenylcysteine carboxyl methyltransferase (ICMT) family	854	771	1023	1016	929	1177	124	91	106	262	175	186	14.0867	16.82	1.69	3.31667	0.131	-2.934	2.52468e-40	4.44667e-38	down	0.253	-1.981	4.88713e-23	1.81308e-21	down	0.101	-3.307	1.43533e-79	6.47446e-77	down	0.195	-2.356	2.32935e-48	1.39682e-46	down
g5288	LG2	7182851	7187190	+	No apical meristem (NAM) protein	1498	1280	1360	1370	1233	1279	468	386	502	481	647	688	17.76	16.9933	5.82667	7.93667	0.358	-1.481	3.44482e-18	1.25054e-16	down	0.481	-1.056	1.71965e-09	1.65867e-08	down	0.345	-1.535	7.30845e-24	3.36163e-22	down	0.463	-1.112	1.78005e-12	1.51789e-11	down
g53218	LG13	15068611	15072085	+	PsbP	322	413	474	351	321	400	76	34	58	114	106	99	7.24	6.5	0.986667	1.92667	0.148	-2.752	9.60922e-18	3.33985e-16	down	0.286	-1.808	2.29459e-14	3.96623e-13	down	0.153	-2.71	6.61567e-22	2.60525e-20	down	0.293	-1.771	2.93334e-19	4.32138e-18	down
g53323	LG13	15868048	15869669	-	--	1351	1817	1630	796	677	818	420	212	219	392	305	396	66.6033	32.3467	11.54	15.2667	0.189	-2.406	7.56206e-23	4.42281e-21	down	0.246	-2.023	7.7983e-38	7.10123e-36	down	0.359	-1.478	1.37582e-10	1.72288e-09	down	0.467	-1.098	4.17066e-17	5.21965e-16	down
g53324	LG13	15870105	15874599	-	ATP-dependent protease La (LON) substrate-binding domain	1780	2309	2178	1297	1127	1383	649	343	452	605	502	565	32.8	20.2567	7.43333	8.82333	0.247	-2.019	1.4784e-20	7.00749e-19	down	0.289	-1.792	3.33541e-34	2.52628e-32	down	0.369	-1.438	9.21675e-14	1.67288e-12	down	0.431	-1.214	5.40301e-27	1.26298e-25	down
g53733	LG13	19075629	19076604	-	--	93	109	38	70	36	58	1	0	0	0	0	0	2.97	2.09333	0.01	0	0.005	-7.652	5.75638e-09	6.49602e-08	down	0.003	-8.619	2.16845e-11	2.65535e-10	down	0.007	-7.263	3.49519e-08	3.12622e-07	down	0.003	-8.231	2.13672e-10	1.4926e-09	down
g53780	LG13	19447209	19452465	-	--	388	401	343	73	129	116	3	14	20	19	13	19	2.41	0.696667	0.0833333	0.11	0.037	-4.768	2.59275e-26	1.94968e-24	down	0.049	-4.353	8.38947e-57	1.67234e-54	down	0.118	-3.084	8.53244e-07	6.15362e-06	down	0.156	-2.684	9.05023e-11	6.58443e-10	down
g53845	LG13	19969893	19971208	-	Ribosomal protein S8e	472	480	448	300	277	316	68	74	65	79	74	106	11.2	7.29333	1.66333	2.09333	0.162	-2.628	3.29297e-35	4.43553e-33	down	0.201	-2.317	1.70241e-34	1.31174e-32	down	0.229	-2.126	1.84949e-20	6.40363e-19	down	0.284	-1.816	1.22222e-17	1.58652e-16	down
g54048	LG13	21340758	21344550	-	--	328	301	218	344	308	421	72	78	35	32	29	26	3.44667	4.48667	0.753333	0.36	0.239	-2.067	3.80429e-10	5.06965e-09	down	0.113	-3.151	3.74127e-31	2.44538e-29	down	0.169	-2.563	1.5975e-16	3.88796e-15	down	0.08	-3.648	2.35532e-45	1.2928e-43	down
g54049	LG13	21346733	21350350	-	--	78	71	86	216	154	273	34	29	23	19	34	28	1.04667	2.90333	0.38	0.366667	0.396	-1.338	0.000490962	0.00203807	down	0.378	-1.403	0.000411496	0.00154304	down	0.132	-2.925	7.06487e-18	1.9261e-16	down	0.126	-2.994	1.91708e-18	2.65742e-17	down
g54057	LG13	21385575	21387169	+	Ankyrin repeats (many copies)	1002	1236	1054	2090	1900	2219	626	312	467	549	447	391	28.98	55.7633	12.2133	12.38	0.459	-1.124	6.54443e-07	5.16288e-06	down	0.459	-1.124	2.44991e-11	2.98088e-10	down	0.22	-2.183	2.65634e-28	1.62221e-26	down	0.22	-2.185	3.37607e-59	2.94591e-57	down
g54080	LG13	21538978	21541941	+	Glucosyltransferase 24	214	154	135	251	213	233	72	78	64	71	43	64	1.86667	2.65333	0.8	0.666667	0.469	-1.094	0.000196194	0.000903714	down	0.384	-1.38	9.1747e-07	5.82572e-06	down	0.304	-1.72	1.31287e-12	2.10479e-11	down	0.249	-2.005	1.0865e-16	1.31504e-15	down
g54209	LG13	22459262	22461000	+	F-box domain	1348	1230	879	1798	1654	1887	395	371	274	497	442	412	15.6833	24.9033	4.73	6.26667	0.329	-1.602	2.84375e-16	8.34661e-15	down	0.429	-1.22	8.66118e-14	1.40782e-12	down	0.191	-2.385	9.22684e-58	2.30352e-55	down	0.249	-2.005	2.7384e-64	2.7957e-62	down
g54240	LG13	22668313	22671115	+	Beta-eliminating lyase	1195	1115	1284	1167	942	938	364	147	236	659	472	305	13.38	11.5167	2.71667	5.40333	0.221	-2.176	2.16328e-16	6.4248e-15	down	0.434	-1.203	6.14305e-07	4.02837e-06	down	0.237	-2.075	5.5752e-16	1.27997e-14	down	0.465	-1.105	7.04469e-07	3.28294e-06	down
g54265	LG13	22822084	22826586	-	AAA domain	1308	1327	1195	1221	985	1175	483	339	432	539	439	517	15.1067	13.6	4.93	5.96667	0.356	-1.49	1.91942e-22	1.06648e-20	down	0.424	-1.238	2.40431e-30	1.48663e-28	down	0.365	-1.455	5.5187e-21	2.00242e-19	down	0.434	-1.204	2.3177e-25	4.95539e-24	down
g54346	LG13	23334659	23341546	-	ADP-ribosylation factor family	7671	8578	8341	9514	8337	9187	3019	2262	2438	3281	2913	2365	45.15	50.5367	14.0633	15.9433	0.34	-1.557	6.16301e-33	7.10522e-31	down	0.38	-1.397	2.55036e-20	7.67733e-19	down	0.28	-1.835	2.0902e-83	1.02433e-80	down	0.313	-1.677	9.61666e-42	4.59316e-40	down
g54469	LG13	24060143	24063474	-	Myb-like DNA-binding domain	14459	14040	15279	9694	8724	9683	3925	2137	3155	4727	4135	3347	167.283	109.237	34.7733	47.27	0.227	-2.142	2.169e-29	1.99933e-27	down	0.304	-1.718	8.94837e-30	5.3834e-28	down	0.32	-1.644	4.67281e-22	1.86795e-20	down	0.429	-1.221	1.85273e-22	3.31843e-21	down
g54499	LG13	24223282	24225409	+	--	494	670	503	1375	1347	1649	1	5	0	0	2	3	7.94	21.2967	0.0266667	0.0233333	0.004	-7.991	1.14343e-35	1.5994e-33	down	0.003	-8.26	3.31116e-34	2.51266e-32	down	0.001	-9.531	1.38083e-54	3.16832e-52	down	0.001	-9.8	5.37856e-50	3.43731e-48	down
g5467	LG2	8374705	8377500	-	Glycosyl hydrolase family 3 N terminal domain	90	56	52	89	58	67	29	9	15	6	4	3	1.41667	1.56667	0.37	0.0966667	0.287	-1.8	0.000687203	0.00274039	down	0.072	-3.798	1.36832e-10	1.51868e-09	down	0.239	-2.062	5.20552e-05	0.000262892	down	0.06	-4.064	2.86128e-12	2.39635e-11	down
g54710	LG13	25472798	25475046	-	PDZ domain	1177	1432	1363	769	811	854	435	277	321	484	392	349	14.3833	8.98667	3.69667	4.48333	0.28	-1.836	4.09274e-23	2.45105e-21	down	0.335	-1.578	1.00365e-20	3.12943e-19	down	0.414	-1.272	3.82545e-14	7.23102e-13	down	0.494	-1.016	4.0681e-11	3.05553e-10	down
g54780	LG13	25881034	25881988	+	--	623	653	674	613	635	631	313	193	251	308	220	253	17.2733	16.9733	6.63667	6.95667	0.419	-1.255	1.93802e-10	2.70896e-09	down	0.433	-1.208	3.68479e-14	6.22685e-13	down	0.393	-1.346	2.20056e-13	3.85147e-12	down	0.406	-1.3	2.28967e-18	3.15251e-17	down
g54964	LG13	27073017	27074573	-	Chlorophyll A-B binding protein	46	62	36	38	59	52	22	14	10	0	8	11	1.07	1.14667	0.34	0.146667	0.345	-1.535	0.00357696	0.011514	down	0.146	-2.776	0.000178957	0.000726397	down	0.298	-1.746	0.00100973	0.0037752	down	0.126	-2.989	3.98299e-05	0.000143814	down
g55177	LG13	28427287	28429713	+	PA domain	124	111	90	115	80	312	11	15	29	26	17	17	0.983333	1.56	0.17	0.183333	0.189	-2.401	4.87381e-07	3.94211e-06	down	0.201	-2.314	8.08797e-11	9.22725e-10	down	0.11	-3.185	1.25961e-07	1.03907e-06	down	0.116	-3.102	2.34327e-10	1.62964e-09	down
g55188	LG13	28474734	28477582	-	NAD(P)H-binding	202	268	272	257	310	394	72	49	48	24	54	36	5.54	7.30333	1.24	0.876667	0.245	-2.03	2.88152e-12	5.2531e-11	down	0.169	-2.561	1.73544e-13	2.7197e-12	down	0.171	-2.544	1.0064e-19	3.25584e-18	down	0.118	-3.078	2.28869e-21	3.83046e-20	down
g55313	LG13	29136640	29137655	+	Trypsin and protease inhibitor	39	60	24	80	78	505	6	9	0	0	2	4	0.88	4.88	0.106667	0.0433333	0.134	-2.904	0.00108363	0.00407969	down	0.054	-4.221	9.03406e-07	5.74278e-06	down	0.022	-5.491	7.83522e-05	0.00037994	down	0.009	-6.804	2.98902e-07	1.46078e-06	down
g55348	LG13	29324637	29331314	-	TFIIH C1-like domain	583	533	517	254	225	205	116	51	118	120	60	85	6.49333	2.77667	1.12667	1.05667	0.189	-2.401	6.11907e-16	1.73859e-14	down	0.175	-2.515	1.77223e-32	1.25234e-30	down	0.408	-1.293	0.000123727	0.000576244	down	0.376	-1.41	4.26955e-08	2.31134e-07	down
g55801	LG14	3268351	3270031	+	Voltage gated chloride channel	86	32	56	69	30	30	16	14	17	8	13	14	1.10667	0.83	0.3	0.226667	0.297	-1.754	0.00146094	0.00529599	down	0.221	-2.178	7.45337e-05	0.000328314	down	0.363	-1.462	0.0124784	0.0336938	down	0.27	-1.887	0.00148046	0.00404289	down
g56284	LG14	6455813	6458551	-	Ubiquitin family	383	355	372	251	251	275	165	86	145	48	40	40	8.58667	6.13	3.03333	1	0.386	-1.375	8.91018e-08	8.23214e-07	down	0.125	-2.997	9.0352e-42	1.00559e-39	down	0.498	-1.006	0.000164676	0.000745191	down	0.162	-2.629	2.15373e-27	5.13137e-26	down
g5684	LG2	9891188	9899184	+	Myb-like DNA-binding domain	432	372	327	230	262	285	110	71	82	131	94	98	6.39	4.51	1.47667	1.85	0.253	-1.985	3.59962e-19	1.46642e-17	down	0.311	-1.685	1.86055e-17	4.36969e-16	down	0.33	-1.598	8.10657e-11	1.04545e-09	down	0.406	-1.299	5.64947e-09	3.3833e-08	down
g5701	LG2	10009378	10010235	+	CS domain	1332	99	26	272	138	80	0	9	1	11	34	25	12.0667	4.26333	0.09	0.623333	0.008	-6.918	0.000463098	0.0019383	down	0.056	-4.155	0.00355742	0.0105386	down	0.021	-5.582	8.59362e-12	1.25275e-10	down	0.144	-2.792	2.15545e-08	1.2096e-07	down
g5751	LG2	10408835	10412741	+	SNARE associated Golgi protein	3425	3033	3209	6715	6380	7024	753	375	496	1100	1366	1116	46.33	98.3467	7.65667	17.5333	0.18	-2.473	3.05403e-34	3.80612e-32	down	0.407	-1.295	3.37669e-16	6.9775e-15	down	0.078	-3.675	2.3859e-90	1.41356e-87	down	0.177	-2.5	2.23351e-79	3.60514e-77	down
g57879	LG14	18241142	18241989	-	Cysteine-rich secretory protein family	51	94	38	61	57	45	6	2	2	13	25	16	1.57	1.45	0.0833333	0.486667	0.059	-4.085	3.59595e-08	3.54835e-07	down	0.33	-1.601	0.00216206	0.00679482	down	0.059	-4.074	4.94132e-09	5.03454e-08	down	0.331	-1.596	0.00103294	0.00290612	down
g58059	LG14	19477529	19481404	-	--	55	46	59	63	28	55	27	3	6	4	7	16	1.23333	1.13333	0.26	0.21	0.231	-2.113	0.00385497	0.0122873	down	0.182	-2.459	1.51506e-05	7.68995e-05	down	0.232	-2.108	0.00687946	0.0202192	down	0.182	-2.459	8.91217e-05	0.000303643	down
g58496	LG14	22704975	22707983	-	C2H2-type zinc finger	129	222	130	77	64	99	10	22	20	33	21	35	2.56	1.31	0.286667	0.476667	0.121	-3.052	2.85887e-11	4.52052e-10	down	0.2	-2.321	2.45962e-11	2.99179e-10	down	0.218	-2.196	9.92297e-06	5.83717e-05	down	0.362	-1.468	0.000119428	0.000398388	down
g58693	LG14	24028797	24030507	+	UDP-glucoronosyl and UDP-glucosyl transferase	32	42	31	42	10	275	10	17	7	0	2	4	0.453333	1.42	0.15	0.0266667	0.356	-1.489	0.0153351	0.0400026	down	0.062	-4.005	1.99322e-06	1.19697e-05	down	0.104	-3.26	0.000568561	0.00226075	down	0.018	-5.776	0.000357611	0.00109803	down
g58785	LG14	24628692	24630679	-	Reverse transcriptase (RNA-dependent DNA polymerase)	102	91	46	16	18	51	0	0	0	0	4	2	0.873333	0.32	0	0.0233333	0.003	-8.611	3.16781e-11	4.96002e-10	down	0.028	-5.157	1.01501e-11	1.30432e-10	down	0.006	-7.284	1.32239e-06	9.24e-06	down	0.071	-3.81	0.000126704	0.000420874	down
g58891	LG14	25353295	25354385	+	--	858	1020	833	844	701	803	401	322	358	442	303	369	20.25	17.9	8.06333	8.39333	0.434	-1.203	3.97639e-14	9.1792e-13	down	0.445	-1.168	7.92908e-15	1.43688e-13	down	0.454	-1.141	7.31519e-16	1.65174e-14	down	0.464	-1.108	1.6838e-15	1.86193e-14	down
g59035	LG14	26210531	26211788	-	--	93	68	86	241	158	166	10	14	27	5	10	9	2.67333	6.20333	0.563333	0.266667	0.23	-2.122	4.41176e-05	0.000237284	down	0.106	-3.234	1.80093e-11	2.23394e-10	down	0.091	-3.459	5.09534e-15	1.05729e-13	down	0.042	-4.572	7.60972e-28	1.86866e-26	down
g59118	LG14	26713756	26715880	+	--	1201	2480	1458	1080	702	579	88	100	132	307	247	177	35.8333	16.7967	2.26667	5.19667	0.069	-3.86	3.37901e-35	4.53615e-33	down	0.156	-2.685	2.65394e-23	1.00411e-21	down	0.136	-2.881	4.5478e-23	1.94741e-21	down	0.306	-1.706	2.54484e-12	2.1401e-11	down
g59328	LG14	28041081	28042640	-	ATP synthase	766	1137	816	626	618	756	227	138	220	201	196	206	13.5667	10.2067	2.91333	3.06	0.234	-2.097	2.22958e-17	7.46398e-16	down	0.242	-2.048	9.87866e-28	5.16721e-26	down	0.287	-1.8	1.87068e-16	4.52233e-15	down	0.296	-1.754	3.88047e-29	1.02568e-27	down
g59366	LG14	28254144	28256664	-	Ankyrin repeat	273	323	224	291	197	187	79	53	102	92	86	59	3.00333	2.53	0.866667	0.89	0.314	-1.673	7.27664e-08	6.82376e-07	down	0.318	-1.654	1.84968e-10	2.02048e-09	down	0.344	-1.539	4.15601e-06	2.63914e-05	down	0.348	-1.522	8.4561e-08	4.42663e-07	down
g59439	LG14	28697956	28700205	-	Cupin domain	31	26	23	15	9	41	4	2	0	1	9	0	0.406667	0.336667	0.03	0.0533333	0.08	-3.642	0.000141064	0.000673904	down	0.145	-2.785	0.00486968	0.0138457	down	0.089	-3.495	0.00263163	0.00878207	down	0.163	-2.619	0.0210504	0.0438746	down
g59454	LG14	28762940	28766986	+	PAP_fibrillin	270	348	252	446	317	344	108	41	108	113	140	112	4.09333	5.31	1.20333	1.76	0.32	-1.643	5.96765e-06	3.88062e-05	down	0.462	-1.115	2.36975e-06	1.40187e-05	down	0.228	-2.135	6.62148e-10	7.57027e-09	down	0.328	-1.609	5.0648e-13	4.51991e-12	down
g59475	LG14	28872440	28874818	-	Zinc finger domain	15	17	42	36	18	47	4	8	0	1	2	2	0.356667	0.48	0.0566667	0.0233333	0.173	-2.533	0.0176221	0.0449398	down	0.072	-3.793	0.000116353	0.000490988	down	0.118	-3.082	0.00122642	0.00448694	down	0.049	-4.348	1.83677e-06	8.06974e-06	down
g59636	LG14	29686491	29688311	-	--	169	177	400	98	49	30	0	0	0	5	2	0	3.09	0.726667	0	0.03	0.001	-10.306	5.63688e-16	1.60844e-14	down	0.01	-6.649	1.03189e-21	3.43395e-20	down	0.003	-8.334	1.16093e-09	1.28258e-08	down	0.039	-4.681	1.32017e-08	7.59215e-08	down
g59719	LG14	30051266	30052557	+	PetM family of cytochrome b6f complex subunit 7	418	401	578	809	1014	1078	157	196	141	116	106	137	14.1267	29.7467	4.96333	3.63333	0.384	-1.379	6.26111e-07	4.96483e-06	down	0.276	-1.855	1.43022e-15	2.75238e-14	down	0.168	-2.572	9.15345e-32	6.82982e-30	down	0.121	-3.048	5.2824e-68	6.1458e-66	down
g59873	LG15	121516	126432	+	ESCO1/2 acetyl-transferase	154	192	116	94	122	78	35	41	26	19	8	5	1.55	1.02	0.343333	0.11	0.243	-2.043	7.38801e-09	8.18491e-08	down	0.075	-3.73	4.23181e-17	9.61746e-16	down	0.341	-1.554	9.89977e-05	0.000470062	down	0.106	-3.242	7.81297e-11	5.72096e-10	down
g59877	LG15	146826	147665	+	Late embryogenesis abundant protein	531	638	500	196	128	118	34	40	47	18	11	13	14.6067	3.94	1.07333	0.37	0.08	-3.648	9.01393e-46	2.21228e-43	down	0.027	-5.193	3.23208e-73	1.10684e-70	down	0.274	-1.87	2.73022e-07	2.13254e-06	down	0.093	-3.423	1.29984e-18	1.82036e-17	down
g60012	LG15	823858	827603	+	--	441	450	419	394	416	427	208	145	161	111	108	134	3.14	3.03	1.22	0.856667	0.425	-1.233	1.85217e-11	3.00959e-10	down	0.293	-1.771	3.2383e-24	1.33487e-22	down	0.406	-1.299	3.14746e-12	4.83883e-11	down	0.28	-1.838	4.96972e-24	9.80427e-23	down
g60181	LG15	1923487	1928591	-	CLIP1 zinc knuckle	48	63	37	44	34	24	11	16	10	0	2	2	0.32	0.23	0.0833333	0.00666667	0.276	-1.857	0.000561863	0.0022922	down	0.03	-5.073	9.95523e-09	8.65616e-08	down	0.36	-1.473	0.014778	0.0388099	down	0.039	-4.687	1.07554e-06	4.89272e-06	down
g60323	LG15	2811179	2813226	-	Reverse transcriptase-like	33	36	19	35	43	30	6	5	11	0	0	2	0.356667	0.456667	0.09	0.00666667	0.278	-1.846	0.00841499	0.024132	down	0.025	-5.338	1.38157e-05	7.06512e-05	down	0.202	-2.309	0.000463976	0.00188859	down	0.018	-5.8	1.33326e-06	5.97655e-06	down
g60401	LG15	3308984	3310445	+	HSF-type DNA-binding	333	402	259	560	300	330	38	47	46	122	83	98	5.37333	6.56333	0.72	1.66333	0.146	-2.78	4.26194e-22	2.29783e-20	down	0.332	-1.592	1.12541e-12	1.60411e-11	down	0.11	-3.183	2.32446e-23	1.02635e-21	down	0.25	-1.998	5.20393e-15	5.51073e-14	down
g60411	LG15	3388831	3394275	+	Chlorophyll A-B binding protein	587	547	680	950	698	508	320	259	177	385	122	95	6.34333	7.63333	2.59667	2.09	0.448	-1.16	8.62319e-07	6.6571e-06	down	0.353	-1.503	0.0128848	0.0323915	down	0.343	-1.545	7.46562e-09	7.40869e-08	down	0.27	-1.889	0.00293916	0.0075214	down
g6048	LG2	12704492	12708953	-	Zinc knuckle	96	80	59	65	57	84	5	21	6	0	0	0	0.44	0.393333	0.0633333	0	0.153	-2.705	1.8742e-05	0.000109328	down	0.003	-8.6	6.56786e-12	8.62236e-11	down	0.157	-2.672	3.75834e-05	0.000195527	down	0.003	-8.567	1.32067e-11	1.04278e-10	down
g60657	LG15	4906571	4909376	-	--	165	119	108	44	45	91	25	28	17	25	22	33	3.55333	1.67	0.636667	0.733333	0.196	-2.352	4.40476e-10	5.83292e-09	down	0.222	-2.169	5.32236e-11	6.20638e-10	down	0.384	-1.383	0.0075024	0.0217887	down	0.435	-1.201	0.00951519	0.0215861	down
g60658	LG15	4909601	4914742	+	--	91	110	89	105	99	75	34	32	53	24	24	42	1.21333	1.19333	0.506667	0.376667	0.453	-1.144	0.00315761	0.0103253	down	0.336	-1.573	9.74326e-06	5.13933e-05	down	0.424	-1.237	0.00214096	0.00732823	down	0.315	-1.668	1.09407e-05	4.3126e-05	down
g60677	LG15	5009334	5011576	-	--	2631	1882	1698	1905	1843	1899	1187	487	910	796	424	360	26.17	24.44	10.7933	6.73667	0.449	-1.154	2.11022e-05	0.00012173	down	0.277	-1.853	7.5408e-14	1.23372e-12	down	0.444	-1.172	1.39653e-06	9.71865e-06	down	0.273	-1.874	2.38719e-08	1.33231e-07	down
g60788	LG15	5753587	5754169	+	--	650	740	794	931	706	911	272	118	186	344	288	330	27.7333	32.7767	7.16	12.2933	0.281	-1.83	1.10111e-11	1.84309e-10	down	0.476	-1.07	2.73349e-11	3.31085e-10	down	0.22	-2.186	1.87337e-18	5.42404e-17	down	0.371	-1.43	7.39478e-25	1.5415e-23	down
g60789	LG15	5754777	5757304	+	No apical meristem (NAM) protein	1419	1871	1783	1762	1674	1694	412	158	338	799	594	593	25.62	26.37	4.51333	10.1033	0.191	-2.385	5.17555e-16	1.48315e-14	down	0.423	-1.24	3.46327e-13	5.22844e-12	down	0.172	-2.54	7.54079e-22	2.95782e-20	down	0.379	-1.398	7.64356e-30	2.0851e-28	down
g60894	LG15	6479229	6488050	+	Microtubule binding	160	176	208	587	560	603	28	52	32	37	51	38	1.32333	4.31667	0.273333	0.313333	0.226	-2.144	1.56624e-08	1.65018e-07	down	0.253	-1.983	1.18433e-10	1.32291e-09	down	0.064	-3.973	3.76275e-47	6.04706e-45	down	0.071	-3.813	5.50918e-71	7.11957e-69	down
g61039	LG15	7483874	7484962	+	Iodothyronine deiodinase	584	937	583	541	355	495	205	150	267	94	85	115	25.7667	17.3833	7.69333	3.65333	0.325	-1.622	2.69878e-08	2.72363e-07	down	0.152	-2.718	1.47815e-32	1.05009e-30	down	0.445	-1.168	1.62217e-05	9.15441e-05	down	0.208	-2.267	9.43346e-28	2.30265e-26	down
g61217	LG15	8628370	8633248	+	Bacterial trigger factor protein (TF)	1111	1285	1186	1345	1395	1382	659	412	416	498	483	376	12.7333	14.9633	5.20667	4.90667	0.446	-1.165	1.91658e-10	2.68274e-09	down	0.414	-1.271	1.24205e-13	1.98425e-12	down	0.351	-1.512	2.90434e-20	9.88747e-19	down	0.325	-1.621	3.74799e-27	8.8421e-26	down
[truncated: 51 more rows]

## Sheet: Table S5
Table S5. Values of the correlation coefficient reflecting the gene-metabolite, metabolite-metabolite, gene-gene, and metabolite-gene interactions visualized in Figure 5 (P<0.05)
Genes (Var1 )	Metabolites (Var2)	PCC	P_value (P<0.05)
[truncated: 196 more rows]
